# Supplementary material
Source: publisher figshare collection journal article supplement (https://acs.figshare.com/ndownloader/files/7862941)
Supplement: Supplementary file 1 [file 7862941]

 
data_shelx
# start Validation Reply Form
_vrf_PLAT601_shelx
;
PROBLEM: Structure Contains Solvent Accessible VOIDS of .        146 Ang3  
RESPONSE: The molecules reside around a crystallographic 3-fold rotation 
axis.  Molecules are stacked along the c-axis direction.  The void is 
situated between adjacent molecules stacked along c.  No appreciable 
electron density was observed in this area.
;
# end Validation Reply Form
 
_audit_creation_method            'SHELXL-2014/7'
_shelx_SHELXL_version_number      '2014/7'
_chemical_name_systematic         ?
_chemical_name_common             ?
_chemical_melting_point           ?
_chemical_formula_moiety          
 'C84 H87 N9'
_chemical_formula_sum
 'C84 H87 N9' 
_chemical_formula_weight          1222.62

loop_
 _atom_type_symbol
 _atom_type_description
 _atom_type_scat_dispersion_real
 _atom_type_scat_dispersion_imag
 _atom_type_scat_source
 'C'  'C'   0.0181   0.0091
 'International Tables Vol C Tables 4.2.6.8 and 6.1.1.4'
 'H'  'H'   0.0000   0.0000
 'International Tables Vol C Tables 4.2.6.8 and 6.1.1.4'
 'N'  'N'   0.0311   0.0180
 'International Tables Vol C Tables 4.2.6.8 and 6.1.1.4'
 
_space_group_crystal_system       trigonal
_space_group_IT_number            161
_space_group_name_H-M_alt         'R 3 c :H'
_space_group_name_Hall            'R 3 -2"c'
 
_shelx_space_group_comment
;
The symmetry employed for this shelxl refinement is uniquely defined
by the following loop, which should always be used as a source of
symmetry information in preference to the above space-group names.
They are only intended as comments.
;
 
loop_
 _space_group_symop_operation_xyz
 'x, y, z'
 '-y, x-y, z'
 '-x+y, -x, z'
 '-x+y, y, z+1/2'
 'x, x-y, z+1/2'
 '-y, -x, z+1/2'
 'x+2/3, y+1/3, z+1/3'
 '-y+2/3, x-y+1/3, z+1/3'
 '-x+y+2/3, -x+1/3, z+1/3'
 '-x+y+2/3, y+1/3, z+5/6'
 'x+2/3, x-y+1/3, z+5/6'
 '-y+2/3, -x+1/3, z+5/6'
 'x+1/3, y+2/3, z+2/3'
 '-y+1/3, x-y+2/3, z+2/3'
 '-x+y+1/3, -x+2/3, z+2/3'
 '-x+y+1/3, y+2/3, z+7/6'
 'x+1/3, x-y+2/3, z+7/6'
 '-y+1/3, -x+2/3, z+7/6'
 
_cell_length_a                    33.1271(7)
_cell_length_b                    33.1271(7)
_cell_length_c                    10.8586(3)
_cell_angle_alpha                 90
_cell_angle_beta                  90
_cell_angle_gamma                 120
_cell_volume                      10319.8(5)
_cell_formula_units_Z             6
_cell_measurement_temperature     100(2)
_cell_measurement_reflns_used     5022
_cell_measurement_theta_min       2.63
_cell_measurement_theta_max       73.5
 
_exptl_crystal_description        needle
_exptl_crystal_colour             red
_exptl_crystal_density_meas       ?
_exptl_crystal_density_method     ?
_exptl_crystal_density_diffrn     1.180          
_exptl_crystal_F_000              3924
_exptl_transmission_factor_min    ?
_exptl_transmission_factor_max    ?
_exptl_crystal_size_max           0.370
_exptl_crystal_size_mid           0.040
_exptl_crystal_size_min           0.040
_exptl_absorpt_coefficient_mu     0.533
_shelx_estimated_absorpt_T_min    0.827
_shelx_estimated_absorpt_T_max    0.979
_exptl_absorpt_correction_type    multi-scan
_exptl_absorpt_correction_T_min   0.697
_exptl_absorpt_correction_T_max   1.00
_exptl_absorpt_process_details    
;
CrysAlisPro 1.171.38.27t (Agilent, 2015)
Empirical absorption correction using spherical harmonics,
 implemented in SCALE3 ABSPACK scaling algorithm.
;
_exptl_absorpt_special_details    ?
_diffrn_ambient_temperature       100(2)
_diffrn_radiation_wavelength      1.54184
_diffrn_radiation_type            CuK\a
_diffrn_source                    'sealed microfocus tube'
_diffrn_measurement_device_type   'Agilent SuperNova with AtlasS2 CCD'
_diffrn_measurement_method        \w-scans
_diffrn_detector_area_resol_mean  ?
_diffrn_reflns_number             13468
_diffrn_reflns_av_unetI/netI      0.0409
_diffrn_reflns_av_R_equivalents   0.0425
_diffrn_reflns_limit_h_min        -39
_diffrn_reflns_limit_h_max        39
_diffrn_reflns_limit_k_min        -39
_diffrn_reflns_limit_k_max        41
_diffrn_reflns_limit_l_min        -13
_diffrn_reflns_limit_l_max        9
_diffrn_reflns_theta_min          2.668
_diffrn_reflns_theta_max          73.526
_diffrn_reflns_theta_full         67.684
_diffrn_measured_fraction_theta_max   0.989
_diffrn_measured_fraction_theta_full  0.998
_diffrn_reflns_Laue_measured_fraction_max    0.989
_diffrn_reflns_Laue_measured_fraction_full   0.998
_diffrn_reflns_point_group_measured_fraction_max   0.989
_diffrn_reflns_point_group_measured_fraction_full  0.998
_reflns_number_total              4003
_reflns_number_gt                 3673
_reflns_threshold_expression      'I > 2\s(I)'
_reflns_Friedel_coverage          0.991
_reflns_Friedel_fraction_max      0.989
_reflns_Friedel_fraction_full     0.998
 
_reflns_special_details
;
 Reflections were merged by SHELXL according to the crystal
 class for the calculation of statistics and refinement.
 
 _reflns_Friedel_fraction is defined as the number of unique
 Friedel pairs measured divided by the number that would be
 possible theoretically, ignoring centric projections and
 systematic absences.
;
_publ_section_references
;
CrysAlisPro.  Agilent Technologies (2013).  Agilent Technologies UK Ltd.,
 Oxford, UK, SuperNova CCD System, CrysAlicPro Software 
System, 1.171.37.31

Sheldrick, G. M. (2015). Acta Cryst. A71, 3-8. SHELXT.  An Integrated Space Group 
and Crystal Structure Determination Program.  

Farrugia, L. J. (1999. J. Appl. Cryst., 32, 837-838.  An Integrated System 
of Windows Programs for the Solution, Refinement and Analysis of 
Single Crystal X-ray Diffraction Data.


Sheldrick, G. M.  (2015).  SHELXL-2014/7.  Acta Cryst., C71, 9-18.

Spek, A. L. (1998) PLATON, A Multipurpose Crystallographic Tool, Utrecht 
University, Utrecht, The Netherlands. 
;


_computing_data_collection        'CrysAlisPro V 1.171.37.31, Agilent Technologies'
_computing_cell_refinement        'CrysAlisPro V 1.171.37.31, Agilent Technologies'
_computing_data_reduction         'CrysAlisPro V 1.171.37.31, Agilent Technologies'

_computing_structure_solution     
;

SUPERFLIP.  Palatinus, L. and Chapuis, G., J. Appl. Cryst. 40, 786-790.
;
_computing_structure_refinement   'Shelxl-2014/7, Sheldrick, G. M.'
_computing_molecular_graphics     'XP SHELXTL/PC, Siemens Analytical' 
_computing_publication_material   'Shelxl-2014/7, Sheldrick, G. M.' 


 

  
_refine_special_details
;
 Refined as a 2-component inversion twin.
;
_refine_ls_structure_factor_coef  Fsqd
_refine_ls_matrix_type            full
_refine_ls_weighting_scheme       calc
_refine_ls_weighting_details
'w=1/[\s^2^(Fo^2^)+(0.0527P)^2^+0.6104P] where P=(Fo^2^+2Fc^2^)/3'
_atom_sites_solution_primary      ?
_atom_sites_solution_secondary    ?
_atom_sites_solution_hydrogens    mixed
_refine_ls_hydrogen_treatment     mixed
_refine_ls_extinction_method      none
_refine_ls_extinction_coef        .
_refine_ls_abs_structure_details
;
 Refined as an inversion twin.
;
_refine_ls_abs_structure_Flack    0.1(6)
_chemical_absolute_configuration  unk
_refine_ls_number_reflns          4003
_refine_ls_number_parameters      289
_refine_ls_number_restraints      1
_refine_ls_R_factor_all           0.0417
_refine_ls_R_factor_gt            0.0358
_refine_ls_wR_factor_ref          0.0884
_refine_ls_wR_factor_gt           0.0849
_refine_ls_goodness_of_fit_ref    1.032
_refine_ls_restrained_S_all       1.032
_refine_ls_shift/su_max           0.002
_refine_ls_shift/su_mean          0.000
 
loop_
 _atom_site_label
 _atom_site_type_symbol
 _atom_site_fract_x
 _atom_site_fract_y
 _atom_site_fract_z
 _atom_site_U_iso_or_equiv
 _atom_site_adp_type
 _atom_site_occupancy
 _atom_site_site_symmetry_order  
 _atom_site_calc_flag
 _atom_site_refinement_flags_posn
 _atom_site_refinement_flags_adp
 _atom_site_refinement_flags_occupancy
 _atom_site_disorder_assembly
 _atom_site_disorder_group
C1 C 0.16144(8) 0.55333(8) 0.9715(2) 0.0185(5) Uani 1 1 d . . . . .
C2 C 0.11285(8) 0.52850(8) 0.9329(2) 0.0190(5) Uani 1 1 d . . . . .
C3 C 0.10451(8) 0.48640(8) 0.8888(2) 0.0182(5) Uani 1 1 d . . . . .
C4 C 0.14904(8) 0.48682(8) 0.8978(2) 0.0182(5) Uani 1 1 d . . . . .
C5 C 0.16166(8) 0.45498(8) 0.8578(2) 0.0181(5) Uani 1 1 d . . . . .
C6 C 0.20789(8) 0.46161(8) 0.8727(2) 0.0179(5) Uani 1 1 d . . . . .
C7 C 0.22950(8) 0.43652(8) 0.8306(2) 0.0180(5) Uani 1 1 d . . . . .
C8 C 0.27684(8) 0.46181(8) 0.8693(2) 0.0183(5) Uani 1 1 d . . . . .
C9 C 0.28225(8) 0.49994(8) 0.9373(2) 0.0204(5) Uani 1 1 d . . . . .
C10 C 0.32116(8) 0.53569(8) 1.0105(2) 0.0195(5) Uani 1 1 d . . . . .
C11 C 0.31189(8) 0.55177(9) 1.1199(3) 0.0250(5) Uani 1 1 d . . . . .
H11 H 0.2809 0.5386 1.1496 0.030 Uiso 1 1 calc R U . . .
C12 C 0.34852(9) 0.58717(9) 1.1841(3) 0.0260(5) Uani 1 1 d . . . . .
H12 H 0.3433 0.5980 1.2601 0.031 Uiso 1 1 calc R U . . .
C13 C 0.39323(9) 0.60659(9) 1.1351(3) 0.0251(5) Uani 1 1 d . . . . .
H13 H 0.4189 0.6322 1.1743 0.030 Uiso 1 1 calc R U . . .
C14 C 0.39957(8) 0.58768(8) 1.0274(2) 0.0194(5) Uani 1 1 d . . . . .
C15 C 0.07933(8) 0.54597(8) 0.9524(3) 0.0215(5) Uani 1 1 d . . . . .
H15A H 0.0507 0.5266 0.9039 0.026 Uiso 1 1 calc R U . . .
H15B H 0.0936 0.5784 0.9218 0.026 Uiso 1 1 calc R U . . .
C16 C 0.06633(10) 0.54465(11) 1.0878(3) 0.0327(6) Uani 1 1 d . . . . .
H16A H 0.0944 0.5648 1.1357 0.049 Uiso 1 1 calc R U . . .
H16B H 0.0522 0.5126 1.1184 0.049 Uiso 1 1 calc R U . . .
H16C H 0.0440 0.5557 1.0961 0.049 Uiso 1 1 calc R U . . .
C17 C 0.05732(8) 0.44719(8) 0.8514(2) 0.0214(5) Uani 1 1 d . . . . .
H17A H 0.0611 0.4286 0.7857 0.026 Uiso 1 1 calc R U . . .
H17B H 0.0386 0.4603 0.8176 0.026 Uiso 1 1 calc R U . . .
C18 C 0.03128(9) 0.41517(9) 0.9609(3) 0.0294(6) Uani 1 1 d . . . . .
H18A H 0.0245 0.4327 1.0224 0.044 Uiso 1 1 calc R U . . .
H18B H 0.0507 0.4038 0.9981 0.044 Uiso 1 1 calc R U . . .
H18C H 0.0020 0.3886 0.9319 0.044 Uiso 1 1 calc R U . . .
C19 C 0.12652(8) 0.41188(8) 0.7926(2) 0.0186(5) Uani 1 1 d . . . . .
C20 C 0.09771(8) 0.37114(8) 0.8582(2) 0.0222(5) Uani 1 1 d . . . . .
H20 H 0.1007 0.3705 0.9451 0.027 Uiso 1 1 calc R U . . .
C21 C 0.06460(9) 0.33149(9) 0.7966(3) 0.0277(6) Uani 1 1 d . . . . .
H21 H 0.0446 0.3041 0.8417 0.033 Uiso 1 1 calc R U . . .
C22 C 0.06073(9) 0.33192(9) 0.6694(3) 0.0293(6) Uani 1 1 d . . . . .
H22 H 0.0383 0.3048 0.6273 0.035 Uiso 1 1 calc R U . . .
C23 C 0.08967(9) 0.37204(9) 0.6043(3) 0.0265(5) Uani 1 1 d . . . . .
H23 H 0.0872 0.3723 0.5172 0.032 Uiso 1 1 calc R U . . .
C24 C 0.12236(9) 0.41195(8) 0.6654(3) 0.0228(5) Uani 1 1 d . . . . .
H24 H 0.1420 0.4394 0.6200 0.027 Uiso 1 1 calc R U . . .
C25 C 0.20817(8) 0.39068(8) 0.7643(2) 0.0211(5) Uani 1 1 d . . . . .
H25A H 0.1741 0.3736 0.7791 0.025 Uiso 1 1 calc R U . . .
H25B H 0.2210 0.3718 0.7988 0.025 Uiso 1 1 calc R U . . .
C26 C 0.21706(10) 0.39586(9) 0.6255(3) 0.0275(6) Uani 1 1 d . . . . .
H26A H 0.2506 0.4103 0.6099 0.041 Uiso 1 1 calc R U . . .
H26B H 0.2055 0.4155 0.5911 0.041 Uiso 1 1 calc R U . . .
H26C H 0.2008 0.3651 0.5866 0.041 Uiso 1 1 calc R U . . .
C27 C 0.31428(8) 0.45000(8) 0.8415(2) 0.0204(5) Uani 1 1 d . . . . .
H27A H 0.2994 0.4162 0.8245 0.024 Uiso 1 1 calc R U . . .
H27B H 0.3343 0.4568 0.9152 0.024 Uiso 1 1 calc R U . . .
C28 C 0.34496(9) 0.47697(9) 0.7316(3) 0.0255(5) Uani 1 1 d . . . . .
H28A H 0.3627 0.5103 0.7516 0.038 Uiso 1 1 calc R U . . .
H28B H 0.3252 0.4722 0.6596 0.038 Uiso 1 1 calc R U . . .
H28C H 0.3666 0.4657 0.7133 0.038 Uiso 1 1 calc R U . . .
N1 N 0.18231(7) 0.52916(7) 0.9522(2) 0.0186(4) Uani 1 1 d . . . . .
N2 N 0.24086(7) 0.49902(7) 0.9383(2) 0.0189(4) Uani 1 1 d . . . . .
N3 N 0.36461(7) 0.55224(7) 0.9655(2) 0.0185(4) Uani 1 1 d . . . . .
H2N H 0.2344(12) 0.5209(13) 0.973(3) 0.039(9) Uiso 1 1 d . . . . .
 
loop_
 _atom_site_aniso_label
 _atom_site_aniso_U_11
 _atom_site_aniso_U_22
 _atom_site_aniso_U_33
 _atom_site_aniso_U_23
 _atom_site_aniso_U_13
 _atom_site_aniso_U_12
C1 0.0170(11) 0.0157(11) 0.0224(12) 0.0024(9) 0.0011(9) 0.0080(9)
C2 0.0165(11) 0.0185(11) 0.0222(13) 0.0012(9) 0.0005(9) 0.0089(9)
C3 0.0149(11) 0.0185(11) 0.0217(13) 0.0022(9) -0.0001(8) 0.0086(9)
C4 0.0144(11) 0.0156(11) 0.0225(12) 0.0029(9) 0.0015(9) 0.0060(9)
C5 0.0162(11) 0.0162(10) 0.0211(12) 0.0033(9) 0.0024(9) 0.0077(9)
C6 0.0163(11) 0.0140(10) 0.0220(13) 0.0010(9) -0.0001(9) 0.0067(9)
C7 0.0164(11) 0.0170(11) 0.0201(12) 0.0016(9) 0.0001(9) 0.0080(9)
C8 0.0167(11) 0.0164(11) 0.0220(12) 0.0028(9) 0.0011(9) 0.0085(9)
C9 0.0162(11) 0.0176(11) 0.0280(13) 0.0050(9) 0.0027(10) 0.0088(9)
C10 0.0150(10) 0.0152(11) 0.0286(14) 0.0010(9) -0.0007(9) 0.0077(9)
C11 0.0152(11) 0.0246(13) 0.0335(15) -0.0011(11) 0.0014(10) 0.0088(10)
C12 0.0223(12) 0.0290(13) 0.0261(14) -0.0046(11) 0.0004(10) 0.0122(11)
C13 0.0183(12) 0.0227(12) 0.0309(15) -0.0050(10) -0.0019(10) 0.0077(10)
C14 0.0152(11) 0.0155(11) 0.0279(13) 0.0010(9) 0.0000(9) 0.0079(9)
C15 0.0168(11) 0.0178(11) 0.0322(14) -0.0012(10) -0.0008(10) 0.0104(9)
C16 0.0288(14) 0.0416(16) 0.0371(17) -0.0058(13) -0.0010(12) 0.0247(13)
C17 0.0149(11) 0.0185(11) 0.0303(14) -0.0024(10) -0.0021(10) 0.0080(9)
C18 0.0200(12) 0.0205(12) 0.0438(17) 0.0055(11) 0.0065(11) 0.0072(10)
C19 0.0135(10) 0.0153(11) 0.0285(13) 0.0004(9) -0.0005(9) 0.0083(9)
C20 0.0187(11) 0.0189(11) 0.0273(14) 0.0022(10) -0.0024(10) 0.0082(10)
C21 0.0201(12) 0.0169(12) 0.0423(17) 0.0009(11) -0.0014(11) 0.0065(10)
C22 0.0242(13) 0.0210(12) 0.0414(17) -0.0074(11) -0.0081(11) 0.0103(11)
C23 0.0280(13) 0.0258(13) 0.0272(14) -0.0063(11) -0.0065(11) 0.0146(11)
C24 0.0194(11) 0.0189(12) 0.0300(14) 0.0008(10) 0.0011(10) 0.0096(10)
C25 0.0189(11) 0.0156(11) 0.0298(14) -0.0013(10) -0.0013(10) 0.0095(9)
C26 0.0275(13) 0.0240(13) 0.0305(15) -0.0046(11) 0.0006(10) 0.0124(11)
C27 0.0161(11) 0.0180(11) 0.0278(14) 0.0009(10) 0.0018(9) 0.0091(9)
C28 0.0230(12) 0.0253(12) 0.0296(14) 0.0022(10) 0.0039(10) 0.0132(10)
N1 0.0166(9) 0.0138(9) 0.0242(11) 0.0008(8) 0.0002(8) 0.0066(8)
N2 0.0134(9) 0.0162(9) 0.0270(11) -0.0023(8) -0.0011(8) 0.0072(8)
N3 0.0149(9) 0.0158(9) 0.0259(11) 0.0000(8) -0.0005(8) 0.0084(8)
 
_geom_special_details
;
 All esds (except the esd in the dihedral angle between two l.s. planes)
 are estimated using the full covariance matrix.  The cell esds are taken
 into account individually in the estimation of esds in distances, angles
 and torsion angles; correlations between esds in cell parameters are only
 used when they are defined by crystal symmetry.  An approximate (isotropic)
 treatment of cell esds is used for estimating esds involving l.s. planes.
;
 
loop_
 _geom_bond_atom_site_label_1
 _geom_bond_atom_site_label_2
 _geom_bond_distance
 _geom_bond_site_symmetry_2
 _geom_bond_publ_flag
C1 N1 1.310(3) . ?
C1 C2 1.456(3) . ?
C1 C14 1.485(3) 3_565 ?
C2 C3 1.366(3) . ?
C2 C15 1.501(3) . ?
C3 C4 1.471(3) . ?
C3 C17 1.505(3) . ?
C4 C5 1.385(3) . ?
C4 N1 1.409(3) . ?
C5 C6 1.443(3) . ?
C5 C19 1.494(3) . ?
C6 N2 1.372(3) . ?
C6 C7 1.417(3) . ?
C7 C8 1.423(3) . ?
C7 C25 1.500(3) . ?
C8 C9 1.395(3) . ?
C8 C27 1.506(3) . ?
C9 N2 1.356(3) . ?
C9 C10 1.472(3) . ?
C10 N3 1.350(3) . ?
C10 C11 1.397(4) . ?
C11 C12 1.383(4) . ?
C11 H11 0.9500 . ?
C12 C13 1.392(4) . ?
C12 H12 0.9500 . ?
C13 C14 1.391(4) . ?
C13 H13 0.9500 . ?
C14 N3 1.346(3) . ?
C14 C1 1.485(3) 2_665 ?
C15 C16 1.526(4) . ?
C15 H15A 0.9900 . ?
C15 H15B 0.9900 . ?
C16 H16A 0.9800 . ?
C16 H16B 0.9800 . ?
C16 H16C 0.9800 . ?
C17 C18 1.539(4) . ?
C17 H17A 0.9900 . ?
C17 H17B 0.9900 . ?
C18 H18A 0.9800 . ?
C18 H18B 0.9800 . ?
C18 H18C 0.9800 . ?
C19 C24 1.388(4) . ?
C19 C20 1.397(3) . ?
C20 C21 1.391(4) . ?
C20 H20 0.9500 . ?
C21 C22 1.388(4) . ?
C21 H21 0.9500 . ?
C22 C23 1.382(4) . ?
C22 H22 0.9500 . ?
C23 C24 1.389(4) . ?
C23 H23 0.9500 . ?
C24 H24 0.9500 . ?
C25 C26 1.529(4) . ?
C25 H25A 0.9900 . ?
C25 H25B 0.9900 . ?
C26 H26A 0.9800 . ?
C26 H26B 0.9800 . ?
C26 H26C 0.9800 . ?
C27 C28 1.532(4) . ?
C27 H27A 0.9900 . ?
C27 H27B 0.9900 . ?
C28 H28A 0.9800 . ?
C28 H28B 0.9800 . ?
C28 H28C 0.9800 . ?
N2 H2N 0.93(4) . ?
 
loop_
 _geom_angle_atom_site_label_1
 _geom_angle_atom_site_label_2
 _geom_angle_atom_site_label_3
 _geom_angle
 _geom_angle_site_symmetry_1
 _geom_angle_site_symmetry_3
 _geom_angle_publ_flag
N1 C1 C2 112.4(2) . . ?
N1 C1 C14 119.3(2) . 3_565 ?
C2 C1 C14 128.3(2) . 3_565 ?
C3 C2 C1 106.2(2) . . ?
C3 C2 C15 129.2(2) . . ?
C1 C2 C15 124.3(2) . . ?
C2 C3 C4 106.1(2) . . ?
C2 C3 C17 124.6(2) . . ?
C4 C3 C17 129.0(2) . . ?
C5 C4 N1 120.4(2) . . ?
C5 C4 C3 130.9(2) . . ?
N1 C4 C3 108.6(2) . . ?
C4 C5 C6 123.4(2) . . ?
C4 C5 C19 119.3(2) . . ?
C6 C5 C19 117.3(2) . . ?
N2 C6 C7 106.8(2) . . ?
N2 C6 C5 120.0(2) . . ?
C7 C6 C5 133.1(2) . . ?
C6 C7 C8 106.9(2) . . ?
C6 C7 C25 128.9(2) . . ?
C8 C7 C25 124.1(2) . . ?
C9 C8 C7 107.1(2) . . ?
C9 C8 C27 126.3(2) . . ?
C7 C8 C27 126.6(2) . . ?
N2 C9 C8 108.2(2) . . ?
N2 C9 C10 118.8(2) . . ?
C8 C9 C10 132.7(2) . . ?
N3 C10 C11 123.1(2) . . ?
N3 C10 C9 117.3(2) . . ?
C11 C10 C9 119.6(2) . . ?
C12 C11 C10 119.0(2) . . ?
C12 C11 H11 120.5 . . ?
C10 C11 H11 120.5 . . ?
C11 C12 C13 118.6(2) . . ?
C11 C12 H12 120.7 . . ?
C13 C12 H12 120.7 . . ?
C14 C13 C12 118.6(2) . . ?
C14 C13 H13 120.7 . . ?
C12 C13 H13 120.7 . . ?
N3 C14 C13 123.7(2) . . ?
N3 C14 C1 116.3(2) . 2_665 ?
C13 C14 C1 119.9(2) . 2_665 ?
C2 C15 C16 112.2(2) . . ?
C2 C15 H15A 109.2 . . ?
C16 C15 H15A 109.2 . . ?
C2 C15 H15B 109.2 . . ?
C16 C15 H15B 109.2 . . ?
H15A C15 H15B 107.9 . . ?
C15 C16 H16A 109.5 . . ?
C15 C16 H16B 109.5 . . ?
H16A C16 H16B 109.5 . . ?
C15 C16 H16C 109.5 . . ?
H16A C16 H16C 109.5 . . ?
H16B C16 H16C 109.5 . . ?
C3 C17 C18 111.7(2) . . ?
C3 C17 H17A 109.3 . . ?
C18 C17 H17A 109.3 . . ?
C3 C17 H17B 109.3 . . ?
C18 C17 H17B 109.3 . . ?
H17A C17 H17B 108.0 . . ?
C17 C18 H18A 109.5 . . ?
C17 C18 H18B 109.5 . . ?
H18A C18 H18B 109.5 . . ?
C17 C18 H18C 109.5 . . ?
H18A C18 H18C 109.5 . . ?
H18B C18 H18C 109.5 . . ?
C24 C19 C20 119.3(2) . . ?
C24 C19 C5 120.0(2) . . ?
C20 C19 C5 120.7(2) . . ?
C21 C20 C19 120.1(2) . . ?
C21 C20 H20 119.9 . . ?
C19 C20 H20 119.9 . . ?
C22 C21 C20 120.1(2) . . ?
C22 C21 H21 119.9 . . ?
C20 C21 H21 119.9 . . ?
C23 C22 C21 119.7(2) . . ?
C23 C22 H22 120.1 . . ?
C21 C22 H22 120.1 . . ?
C22 C23 C24 120.4(3) . . ?
C22 C23 H23 119.8 . . ?
C24 C23 H23 119.8 . . ?
C19 C24 C23 120.3(2) . . ?
C19 C24 H24 119.8 . . ?
C23 C24 H24 119.9 . . ?
C7 C25 C26 113.1(2) . . ?
C7 C25 H25A 109.0 . . ?
C26 C25 H25A 109.0 . . ?
C7 C25 H25B 109.0 . . ?
C26 C25 H25B 109.0 . . ?
H25A C25 H25B 107.8 . . ?
C25 C26 H26A 109.5 . . ?
C25 C26 H26B 109.5 . . ?
H26A C26 H26B 109.5 . . ?
C25 C26 H26C 109.5 . . ?
H26A C26 H26C 109.5 . . ?
H26B C26 H26C 109.5 . . ?
C8 C27 C28 113.4(2) . . ?
C8 C27 H27A 108.9 . . ?
C28 C27 H27A 108.9 . . ?
C8 C27 H27B 108.9 . . ?
C28 C27 H27B 108.9 . . ?
H27A C27 H27B 107.7 . . ?
C27 C28 H28A 109.5 . . ?
C27 C28 H28B 109.5 . . ?
H28A C28 H28B 109.5 . . ?
C27 C28 H28C 109.5 . . ?
H28A C28 H28C 109.5 . . ?
H28B C28 H28C 109.5 . . ?
C1 N1 C4 106.64(19) . . ?
C9 N2 C6 110.8(2) . . ?
C9 N2 H2N 128(2) . . ?
C6 N2 H2N 121(2) . . ?
C14 N3 C10 116.8(2) . . ?
 
loop_
 _geom_torsion_atom_site_label_1
 _geom_torsion_atom_site_label_2
 _geom_torsion_atom_site_label_3
 _geom_torsion_atom_site_label_4
 _geom_torsion
 _geom_torsion_site_symmetry_1
 _geom_torsion_site_symmetry_2
 _geom_torsion_site_symmetry_3
 _geom_torsion_site_symmetry_4
 _geom_torsion_publ_flag
N1 C1 C2 C3 0.7(3) . . . . ?
C14 C1 C2 C3 -179.2(2) 3_565 . . . ?
N1 C1 C2 C15 175.2(2) . . . . ?
C14 C1 C2 C15 -4.7(4) 3_565 . . . ?
C1 C2 C3 C4 -1.8(3) . . . . ?
C15 C2 C3 C4 -175.9(2) . . . . ?
C1 C2 C3 C17 173.1(2) . . . . ?
C15 C2 C3 C17 -1.1(4) . . . . ?
C2 C3 C4 C5 -174.3(3) . . . . ?
C17 C3 C4 C5 11.2(4) . . . . ?
C2 C3 C4 N1 2.3(3) . . . . ?
C17 C3 C4 N1 -172.2(2) . . . . ?
N1 C4 C5 C6 2.5(4) . . . . ?
C3 C4 C5 C6 178.8(2) . . . . ?
N1 C4 C5 C19 -175.8(2) . . . . ?
C3 C4 C5 C19 0.5(4) . . . . ?
C4 C5 C6 N2 5.7(4) . . . . ?
C19 C5 C6 N2 -176.0(2) . . . . ?
C4 C5 C6 C7 -173.5(3) . . . . ?
C19 C5 C6 C7 4.8(4) . . . . ?
N2 C6 C7 C8 -2.6(3) . . . . ?
C5 C6 C7 C8 176.7(3) . . . . ?
N2 C6 C7 C25 174.0(2) . . . . ?
C5 C6 C7 C25 -6.7(4) . . . . ?
C6 C7 C8 C9 2.4(3) . . . . ?
C25 C7 C8 C9 -174.4(2) . . . . ?
C6 C7 C8 C27 -177.1(2) . . . . ?
C25 C7 C8 C27 6.1(4) . . . . ?
C7 C8 C9 N2 -1.4(3) . . . . ?
C27 C8 C9 N2 178.2(2) . . . . ?
C7 C8 C9 C10 173.1(3) . . . . ?
C27 C8 C9 C10 -7.3(5) . . . . ?
N2 C9 C10 N3 -146.8(2) . . . . ?
C8 C9 C10 N3 39.1(4) . . . . ?
N2 C9 C10 C11 31.6(4) . . . . ?
C8 C9 C10 C11 -142.5(3) . . . . ?
N3 C10 C11 C12 1.8(4) . . . . ?
C9 C10 C11 C12 -176.5(2) . . . . ?
C10 C11 C12 C13 2.1(4) . . . . ?
C11 C12 C13 C14 -3.9(4) . . . . ?
C12 C13 C14 N3 1.9(4) . . . . ?
C12 C13 C14 C1 178.9(2) . . . 2_665 ?
C3 C2 C15 C16 102.9(3) . . . . ?
C1 C2 C15 C16 -70.4(3) . . . . ?
C2 C3 C17 C18 -88.6(3) . . . . ?
C4 C3 C17 C18 85.0(3) . . . . ?
C4 C5 C19 C24 89.9(3) . . . . ?
C6 C5 C19 C24 -88.5(3) . . . . ?
C4 C5 C19 C20 -90.4(3) . . . . ?
C6 C5 C19 C20 91.2(3) . . . . ?
C24 C19 C20 C21 -1.4(4) . . . . ?
C5 C19 C20 C21 178.9(2) . . . . ?
C19 C20 C21 C22 1.4(4) . . . . ?
C20 C21 C22 C23 -0.5(4) . . . . ?
C21 C22 C23 C24 -0.4(4) . . . . ?
C20 C19 C24 C23 0.5(3) . . . . ?
C5 C19 C24 C23 -179.8(2) . . . . ?
C22 C23 C24 C19 0.4(4) . . . . ?
C6 C7 C25 C26 100.6(3) . . . . ?
C8 C7 C25 C26 -83.4(3) . . . . ?
C9 C8 C27 C28 -82.4(3) . . . . ?
C7 C8 C27 C28 97.1(3) . . . . ?
C2 C1 N1 C4 0.8(3) . . . . ?
C14 C1 N1 C4 -179.3(2) 3_565 . . . ?
C5 C4 N1 C1 175.2(2) . . . . ?
C3 C4 N1 C1 -1.8(3) . . . . ?
C8 C9 N2 C6 -0.3(3) . . . . ?
C10 C9 N2 C6 -175.7(2) . . . . ?
C7 C6 N2 C9 1.8(3) . . . . ?
C5 C6 N2 C9 -177.6(2) . . . . ?
C13 C14 N3 C10 2.0(4) . . . . ?
C1 C14 N3 C10 -175.2(2) 2_665 . . . ?
C11 C10 N3 C14 -3.8(3) . . . . ?
C9 C10 N3 C14 174.5(2) . . . . ?
 
loop_
 _geom_hbond_atom_site_label_D 
 _geom_hbond_atom_site_label_H 
 _geom_hbond_atom_site_label_A 
 _geom_hbond_distance_DH 
 _geom_hbond_distance_HA 
 _geom_hbond_distance_DA 
 _geom_hbond_angle_DHA 
 _geom_hbond_site_symmetry_A 
N2 H2N N1  0.93(4) 1.89(4) 2.592(3) 130(3) .
 
_refine_diff_density_max    0.151
_refine_diff_density_min   -0.222
_refine_diff_density_rms    0.038

_shelx_res_file
;

    shelx.res created by SHELXL-2014/7

TITL P3P6-ph in R3c #161 red needles
CELL  1.54184  33.1271  33.1271  10.8586   90.000   90.000  120.000
ZERR     6.00   0.0007   0.0007   0.0003    0.000    0.000    0.000
LATT  -3
SYMM  - Y,   X - Y,   Z
SYMM  - X + Y, - X,   Z
SYMM  - X + Y,   Y, 1/2 + Z
SYMM    X,   X - Y, 1/2 + Z
SYMM  - Y, - X, 1/2 + Z
SFAC  C    H    N
UNIT  504  522  54
MERG   2
TWIN
HTAB N2 N1
FMAP   2
PLAN   20
SIZE     0.040   0.040   0.370
ACTA
HTAB    2.00000
BOND   $H
CONF
LIST   4
L.S.   4
TEMP  -173.00
WGHT    0.052700    0.610400
BASF   0.05633
FVAR       1.80158
C1    1    0.161444    0.553329    0.971530    11.00000    0.01703    0.01571 =
         0.02243    0.00243    0.00112    0.00797
C2    1    0.112848    0.528502    0.932899    11.00000    0.01648    0.01854 =
         0.02223    0.00123    0.00049    0.00892
C3    1    0.104507    0.486397    0.888834    11.00000    0.01491    0.01847 =
         0.02171    0.00218   -0.00007    0.00863
C4    1    0.149037    0.486820    0.897802    11.00000    0.01445    0.01562 =
         0.02249    0.00288    0.00153    0.00599
C5    1    0.161664    0.454983    0.857785    11.00000    0.01624    0.01621 =
         0.02111    0.00330    0.00241    0.00766
C6    1    0.207886    0.461614    0.872651    11.00000    0.01634    0.01401 =
         0.02204    0.00098   -0.00013    0.00669
C7    1    0.229503    0.436520    0.830550    11.00000    0.01640    0.01695 =
         0.02009    0.00157    0.00014    0.00798
C8    1    0.276839    0.461807    0.869322    11.00000    0.01668    0.01642 =
         0.02200    0.00282    0.00107    0.00854
C9    1    0.282254    0.499939    0.937341    11.00000    0.01620    0.01757 =
         0.02800    0.00503    0.00268    0.00884
C10   1    0.321161    0.535692    1.010465    11.00000    0.01495    0.01519 =
         0.02863    0.00095   -0.00067    0.00772
C11   1    0.311885    0.551770    1.119855    11.00000    0.01519    0.02464 =
         0.03350   -0.00106    0.00144    0.00877
AFIX  43
H11   2    0.280864    0.538573    1.149637    11.00000   -1.20000
AFIX   0
C12   1    0.348522    0.587167    1.184105    11.00000    0.02229    0.02896 =
         0.02607   -0.00458    0.00037    0.01224
AFIX  43
H12   2    0.343296    0.598007    1.260125    11.00000   -1.20000
AFIX   0
C13   1    0.393232    0.606593    1.135070    11.00000    0.01834    0.02270 =
         0.03086   -0.00499   -0.00195    0.00773
AFIX  43
H13   2    0.418867    0.632224    1.174297    11.00000   -1.20000
AFIX   0
C14   1    0.399567    0.587677    1.027442    11.00000    0.01524    0.01545 =
         0.02786    0.00097   -0.00002    0.00795
C15   1    0.079335    0.545967    0.952375    11.00000    0.01683    0.01782 =
         0.03221   -0.00124   -0.00080    0.01043
AFIX  23
H15A  2    0.050703    0.526588    0.903884    11.00000   -1.20000
H15B  2    0.093557    0.578395    0.921795    11.00000   -1.20000
AFIX   0
C16   1    0.066328    0.544649    1.087752    11.00000    0.02883    0.04162 =
         0.03708   -0.00577   -0.00096    0.02468
AFIX 137
H16A  2    0.094414    0.564770    1.135658    11.00000   -1.50000
H16B  2    0.052195    0.512596    1.118417    11.00000   -1.50000
H16C  2    0.044023    0.555735    1.096101    11.00000   -1.50000
AFIX   0
C17   1    0.057323    0.447192    0.851432    11.00000    0.01489    0.01851 =
         0.03028   -0.00240   -0.00207    0.00802
AFIX  23
H17A  2    0.061135    0.428646    0.785722    11.00000   -1.20000
H17B  2    0.038560    0.460312    0.817636    11.00000   -1.20000
AFIX   0
C18   1    0.031278    0.415166    0.960884    11.00000    0.02000    0.02054 =
         0.04381    0.00553    0.00651    0.00724
AFIX 137
H18A  2    0.024545    0.432660    1.022355    11.00000   -1.50000
H18B  2    0.050708    0.403825    0.998077    11.00000   -1.50000
H18C  2    0.001991    0.388613    0.931937    11.00000   -1.50000
AFIX   0
C19   1    0.126521    0.411877    0.792569    11.00000    0.01348    0.01532 =
         0.02854    0.00039   -0.00046    0.00827
C20   1    0.097711    0.371137    0.858202    11.00000    0.01873    0.01894 =
         0.02733    0.00217   -0.00238    0.00819
AFIX  43
H20   2    0.100740    0.370514    0.945080    11.00000   -1.20000
AFIX   0
C21   1    0.064604    0.331487    0.796606    11.00000    0.02011    0.01688 =
         0.04234    0.00091   -0.00138    0.00651
AFIX  43
H21   2    0.044602    0.304054    0.841697    11.00000   -1.20000
AFIX   0
C22   1    0.060731    0.331922    0.669412    11.00000    0.02424    0.02099 =
         0.04140   -0.00739   -0.00810    0.01028
AFIX  43
H22   2    0.038289    0.304768    0.627272    11.00000   -1.20000
AFIX   0
C23   1    0.089674    0.372041    0.604297    11.00000    0.02800    0.02582 =
         0.02717   -0.00630   -0.00651    0.01457
AFIX  43
H23   2    0.087191    0.372314    0.517177    11.00000   -1.20000
AFIX   0
C24   1    0.122360    0.411954    0.665418    11.00000    0.01940    0.01895 =
         0.02995    0.00076    0.00110    0.00955
AFIX  43
H24   2    0.141955    0.439428    0.619966    11.00000   -1.20000
AFIX   0
C25   1    0.208169    0.390679    0.764306    11.00000    0.01894    0.01559 =
         0.02984   -0.00132   -0.00135    0.00947
AFIX  23
H25A  2    0.174120    0.373643    0.779134    11.00000   -1.20000
H25B  2    0.221005    0.371772    0.798837    11.00000   -1.20000
AFIX   0
C26   1    0.217056    0.395863    0.625527    11.00000    0.02752    0.02400 =
         0.03048   -0.00456    0.00055    0.01244
AFIX 137
H26A  2    0.250593    0.410314    0.609889    11.00000   -1.50000
H26B  2    0.205504    0.415539    0.591111    11.00000   -1.50000
H26C  2    0.200770    0.365060    0.586607    11.00000   -1.50000
AFIX   0
C27   1    0.314276    0.449997    0.841498    11.00000    0.01615    0.01803 =
         0.02783    0.00090    0.00183    0.00914
AFIX  23
H27A  2    0.299429    0.416179    0.824473    11.00000   -1.20000
H27B  2    0.334264    0.456755    0.915159    11.00000   -1.20000
AFIX   0
C28   1    0.344958    0.476966    0.731591    11.00000    0.02301    0.02535 =
         0.02957    0.00222    0.00390    0.01319
AFIX 137
H28A  2    0.362681    0.510256    0.751560    11.00000   -1.50000
H28B  2    0.325236    0.472220    0.659573    11.00000   -1.50000
H28C  2    0.366583    0.465672    0.713342    11.00000   -1.50000
AFIX   0
N1    3    0.182312    0.529163    0.952199    11.00000    0.01659    0.01384 =
         0.02415    0.00076    0.00018    0.00662
N2    3    0.240861    0.499020    0.938302    11.00000    0.01339    0.01621 =
         0.02702   -0.00230   -0.00105    0.00724
N3    3    0.364611    0.552241    0.965493    11.00000    0.01490    0.01581 =
         0.02586   -0.00002   -0.00054    0.00843
H2N   2    0.234359    0.520923    0.972877    11.00000    0.03890
HKLF    4

REM  P3P6-ph in R3c #161 red needles
REM R1 =  0.0358 for    3673 Fo > 4sig(Fo)  and  0.0417 for all    4003 data
REM    289 parameters refined using      1 restraints

END

WGHT      0.0510      0.9240

REM Instructions for potential hydrogen bonds
HTAB N2 N1

REM Highest difference peak  0.151,  deepest hole -0.222,  1-sigma level  0.038
Q1    1   0.3333  0.6667  1.3753  10.33333  0.05    0.15
Q2    1   0.2531  0.4474  0.8356  11.00000  0.05    0.14
Q3    1   0.3660  0.5536  0.8843  11.00000  0.05    0.13
Q4    1   0.3458  0.6035  1.3386  11.00000  0.05    0.12
Q5    1   0.3584  0.6136  0.9485  11.00000  0.05    0.12
Q6    1   0.3742  0.5938  0.8983  11.00000  0.05    0.12
Q7    1   0.3074  0.5654  0.9493  11.00000  0.05    0.12
Q8    1   0.3455  0.6525  1.4292  11.00000  0.05    0.12
Q9    1   0.2978  0.5928  0.9361  11.00000  0.05    0.12
Q10   1   0.3688  0.5955  1.4000  11.00000  0.05    0.11
Q11   1   0.3901  0.6088  1.3588  11.00000  0.05    0.11
Q12   1   0.0112  0.3122  0.5276  11.00000  0.05    0.11
Q13   1   0.3058  0.6217  1.3484  11.00000  0.05    0.11
Q14   1   0.3472  0.6456  1.3345  11.00000  0.05    0.11
Q15   1   0.3801  0.6319  1.3573  11.00000  0.05    0.11
Q16   1   0.4224  0.5959  1.0041  11.00000  0.05    0.11
Q17   1   0.3569  0.5338  0.7118  11.00000  0.05    0.11
Q18   1   0.0933  0.3688  1.0176  11.00000  0.05    0.11
Q19   1   0.0443  0.5775  1.1184  11.00000  0.05    0.11
Q20   1   0.1918  0.3448  0.8028  11.00000  0.05    0.11
;
_shelx_res_checksum   11458

_shelx_hkl_file
;
   0   0 -12 56135.6 1799.86   4
   0   0  -9-113.724 448.906   4
   0   0  -3 89.4650 405.583   2
   0   1 -13 127.733 305.892   4
  -1   0 -10 15412.0 1062.82   4
   1  -1 -10 15539.2 1051.71   4
   0   1 -10 13560.5 1012.53   4
   0   1  -4 224934. 5236.95   2
   0   1  -4 222371. 5093.36   1
  -1   0  -4 226647. 5065.07   2
   1  -1  -4 224956. 4866.05   2
  -1   0  -1 8.73184 176.029   2
   0   1  -1-96.5821 183.354   1
  -1   1 -11-194.127 470.766   4
   1   0 -11 32.4354 469.565   4
   0  -1 -11-112.112 493.836   4
  -1   1  -8 7554.21 686.600   4
   0  -1  -8 9251.03 753.182   4
   1   0  -8 8255.38 740.509   4
  -1   1  -5-559.638 491.165   1
   1   0  -5-391.832 540.681   1
  -1   1  -5 13.0433 426.130   2
   1   0  -5-45.1825 413.851   2
   0  -1  -5 13.5087 366.359   2
   0  -1  -2 661707. 12220.4   2
  -1   1  -2 699842. 12638.4   2
   2  -2 -11 218.486 528.383   4
  -2   0 -11-48.5844 443.581   4
   0   2 -11-46.4069 527.110   4
   0   2  -8 2393.49 509.964   4
  -2   0  -8 3164.15 501.943   6
   2  -2  -8 3249.65 559.079   4
  -2   0  -8 3544.57 549.331   4
  -2   0  -5 199.402 442.593   2
  -2   0  -5 302.986 409.745   1
   0   2  -5 331.874 510.314   2
   0   2  -5-293.800 482.819   1
   0   2  -2 983043. 17835.2   1
  -2   0  -2 979447. 17862.6   2
  -1  -1 -12 1242.53 444.545   4
   2  -1 -12 1777.75 491.101   4
  -2   1 -12 1236.34 430.198   4
   1   1 -12 1407.76 492.411   4
  -1   2 -12 2250.90 496.548   4
   1  -2 -12 1201.33 468.464   4
  -2   1  -9 2661.00 515.659   6
  -1   2  -9 3296.86 595.908   4
   1   1  -9 2912.02 610.081   4
  -1  -1  -9 2352.50 546.019   4
   1  -2  -9 3160.36 594.429   4
   2  -1  -9 2482.66 562.113   4
  -2   1  -9 3388.69 629.635   4
   1   1  -6 2162.52 664.990   1
   2  -1  -6 1416.63 660.907   1
  -1   2  -6 1482.54 589.610   2
   2  -1  -3 101405. 2541.50   2
  -1   2  -3 105063. 2906.86   2
  -2   1  -3 101016. 2754.92   2
  -1  -1  -3 110331. 2603.30   2
   1  -2  -3 102722. 2330.54   2
  -1   2  -3 101977. 2551.69   1
  -1  -1   0 1652.20 123.234   7
   1   1   0 1846.17 195.635   1
  -1   2   0 1906.36 175.089   1
   1  -2   0 1904.75 131.450   7
  -2   1   0 1796.56 175.531   2
   2   0 -13 385.971 336.141   4
  -2   2 -13 273.873 287.738   4
  -2   2 -10 815.100 512.915   4
   2   0 -10 740.187 544.936   4
   0  -2 -10 1504.94 571.465   4
   0  -2  -4 211400. 4362.25   2
   2   0  -4 192393. 4676.54   2
  -2   2  -4 202253. 4370.94   1
  -2   2  -4 198034. 4890.74   2
  -2   2  -1-75.4909 284.066   2
   0  -2  -1 121.678 117.671   2
  -2   2  -1 21.2772 109.455   1
   0   3 -12 9388.57 742.934   4
  -3   0 -12 8077.53 685.868   4
   3  -3 -12 8746.41 710.604   4
   3  -3  -9-512.184 518.357   4
   0   3  -9 513.782 488.829   4
  -3   0  -9-279.767 485.138   6
  -3   0  -9-252.241 481.622   4
   0   3  -6 52041.6 2381.33   2
   3  -3  -3 47.3070 184.943   2
   0   3  -3 517.367 493.182   1
  -3   0  -3-42.4543 405.047   2
  -3   0   0 511700. 9391.91   2
   0   3   0 517009. 9384.53   1
   3  -3   0 508767. 9086.15   7
  -1   3 -13 373.023 317.128   4
   1   2 -13 581.722 332.811   4
   3  -2 -10 4311.56 699.540   4
  -2  -1 -10 4642.33 690.462   4
  -3   1 -10 4282.43 661.839   4
   2  -3 -10 5203.56 728.285   4
  -1   3 -10 5599.20 710.047   4
   1   2 -10 4789.88 677.898   4
  -3   1 -10 6052.56 651.674   6
   3  -2  -4 176929. 3873.59   2
  -1   3  -4 187999. 4754.94   2
  -1   3  -4 175353. 4093.75   1
   2  -3  -4 165036. 3508.79   2
  -3   1  -4 169985. 4335.10   2
   1   2  -4 174868. 4372.79   1
  -2  -1  -4 184508. 4127.60   2
   1   2  -4 176067. 4494.12   2
  -3   1  -4 171851. 3634.35   1
  -1   3  -1 97614.4 2109.01   1
  -2  -1  -1 93504.8 2081.19   2
  -3   1  -1 99858.8 2269.21   2
   1   2  -1 95576.5 2226.59   1
  -1  -2 -11 12178.5 900.464   4
   3  -1 -11 11508.1 938.351   4
   2   1 -11 11448.6 930.380   4
  -3   2 -11 12250.2 908.466   4
   1  -3 -11 10749.8 879.009   4
  -2   3 -11 10689.5 898.161   4
   3  -1  -8 22902.4 1149.69   4
  -3   2  -8 23087.7 1101.53   4
  -2   3  -8 24060.1 1147.05   6
   2   1  -8 23140.4 1146.43   4
  -1  -2  -8 22816.0 1119.57   4
   1  -3  -8 22998.4 1135.07   4
  -3   2  -8 25382.7 1157.65   6
  -2   3  -8 23251.5 1100.50   4
  -3   2  -5 23634.6 1436.87   2
  -1  -2  -5 25070.3 1129.48   2
   2   1  -5 22224.9 1422.04   2
   2   1  -5 21813.4 1477.96   1
  -2   3  -5 22678.1 1129.45   1
  -2   3  -5 23279.8 1448.15   2
   3  -1  -5 23870.7 1200.91   2
  -3   2  -2 64856.2 1955.39   2
  -2   3  -2 66490.9 2012.59   2
  -2   3  -2 65244.8 1603.54   1
  -1  -2  -2 67764.8 1579.45   2
  -1  -2   1 93723.8 2061.26   7
   2   1   1 93109.3 1905.01   1
   0  -3 -12 1916.86 466.245   4
   3   0 -12 1857.46 528.703   4
  -3   3 -12 2086.33 466.658   4
  -3   3  -9 66.2377 471.297   4
   0  -3  -9-229.929 475.287   4
   3   0  -9-108.573 444.311   4
  -3   3  -9-528.892 453.398   6
   3   0  -6 22522.1 1614.95   1
  -3   3  -6 22711.4 1581.76   2
  -3   3  -3 81.2829 534.794   2
  -3   3  -3 87.5197 245.444   1
   0  -3  -3-121.221 217.442   2
   3   0   0 508887. 9418.17   1
   0  -3   0 509131. 9251.04   7
  -3   3   0 523691. 9440.41   2
   0   4 -13 434.626 329.266   4
   4  -4 -10 3755.08 681.548   4
  -4   0 -10 4433.18 597.484   6
  -4   0 -10 3468.67 633.588   4
   0   4 -10 3955.45 672.213   4
   0   4  -4 316842. 6947.28   1
  -4   0  -4 316786. 6949.03   2
   0   4  -4 328263. 7505.74   2
   0   4  -1-306.838 342.882   1
  -4   0  -1-240.050 373.626   2
   1   3 -11 846.114 525.443   4
   3  -4 -11 1346.05 533.613   4
  -4   1 -11 2035.59 517.044   4
   4  -3 -11 1568.62 563.136   4
  -1   4 -11 1355.54 578.100   4
  -3  -1 -11 1634.84 536.371   4
  -1   4  -8 698.106 482.578   6
  -3  -1  -8 657.736 427.803   4
   3  -4  -8 791.068 433.600   4
  -3  -1  -8 751.502 435.626   6
  -4   1  -8 1128.16 442.725   4
   4  -3  -8 369.548 441.409   4
  -4   1  -8 396.299 456.307   6
  -1   4  -8 922.073 446.064   4
   1   3  -8 692.744 413.063   4
  -1   4  -5 2045.63 543.063   1
   1   3  -5 1837.45 634.853   1
   1   3  -5 3103.94 787.369   2
  -3  -1  -5 2721.96 551.347   2
  -4   1  -5 2962.61 643.046   2
  -1   4  -5 1978.23 671.722   2
   1   3  -2 651216. 12303.9   1
  -1   4  -2 651263. 12119.0   1
  -4   1  -2 661521. 12374.6   2
  -3  -1  -2 643960. 12106.0   2
  -3  -1   1 50224.7 1220.58   7
  -1   4   1 51703.1 1409.91   1
   1   3   1 46170.6 1304.97   1
  -4   1   1 48045.9 1107.41   7
  -2   4 -12 1496.40 480.924   4
  -2  -2 -12 1572.51 450.495   4
   2   2 -12 1464.88 490.661   4
   4  -2 -12 1764.64 476.764   4
  -4   2 -12 1094.51 422.548   4
   2  -4 -12 1214.05 466.287   4
   2  -4  -9 2502.14 588.063   4
  -2   4  -9 2961.04 574.097   4
  -2  -2  -9 3043.98 579.115   4
  -2   4  -9 3891.53 574.927   6
   4  -2  -9 2580.71 592.240   4
  -4   2  -9 3531.93 597.083   6
   2   2  -9 3292.07 627.128   4
  -4   2  -9 3232.91 604.021   4
   2   2  -6 14237.4 1284.86   1
   2   2  -6 14017.6 1219.71   2
  -2   4  -6 14953.8 1289.47   2
  -4   2  -6 15887.5 1295.62   2
  -2  -2  -3 116540. 2704.78   2
  -4   2  -3 115799. 3162.68   2
  -2   4  -3 115319. 3325.63   2
   2   2  -3 112586. 3134.22   1
  -2   4  -3 110650. 2733.43   1
   2  -4   0 335920. 6168.45   7
   2   2   0 339266. 6415.38   1
  -2   4   0 336967. 6362.21   1
  -2  -2   0 335724. 6200.01   7
  -4   2   0 334730. 6425.76   2
  -2  -2   9 3885.82 1137.35   7
  -3   4 -13 530.056 293.662   4
   3   1 -13 724.316 361.323   4
  -3   4 -10 4938.06 695.369   4
  -4   3 -10 5005.21 638.548   6
  -4   3 -10 4201.34 675.678   4
   3   1 -10 4204.63 690.877   4
  -3   4 -10 5249.14 653.910   6
  -1  -3 -10 4673.29 691.584   4
   1  -4 -10 4693.16 693.776   4
   4  -1 -10 3650.85 670.555   4
  -1  -3  -4 37021.2 1191.56   2
  -3   4  -4 37776.9 1202.82   1
  -4   3  -4 37679.4 1725.79   2
  -3   4  -4 35128.9 1723.09   2
   3   1  -4 36653.0 1743.13   1
  -3   4  -1 53686.0 1254.78   1
  -3   4  -1 52453.5 1624.87   2
   3   1  -1 50331.6 1548.29   1
   0  -4 -11 199.118 479.084   4
  -4   4 -11-334.724 505.470   4
   4   0 -11 87.9214 488.171   4
  -4   4  -8 11245.1 786.026   4
   4   0  -8 9521.37 840.342   4
   0  -4  -8 11771.9 846.581   4
  -4   4  -8 11040.8 806.493   6
   4   0  -5-425.187 718.943   1
   4   0  -5-333.987 448.933   2
  -4   4  -5 93.4360 578.745   2
  -4   4  -2 95359.7 2610.01   2
  -4   4  -2 88153.1 1850.12   1
   0  -4   1 131.086 293.398   7
   4   0   1 337.376 243.339   1
  -4   4   1 250.537 227.887   2
  -5   0 -11 72.8539 408.777   4
  -5   0 -11 665.841 440.855   6
   5  -5 -11-32.3904 509.880   4
   0   5 -11-343.886 583.666   4
   0   5  -8 27127.3 1234.13   4
  -5   0  -8 27712.2 1230.67   6
   5  -5  -8 28203.8 1313.97   4
  -5   0  -8 26881.3 1194.95   4
  -5   0  -5 175.970 484.211   2
   0   5  -5-474.522 563.221   1
   0   5  -5-97.3404 694.806   2
  -5   0  -2 440629. 8727.09   2
   0   5  -2 440955. 8709.52   1
   0   5   1 54.7836 402.413   1
  -5   0   1 86.7421 200.154   7
   4  -5 -12 9083.67 723.601   4
  -1   5 -12 9529.83 738.355   4
   5  -4 -12 9586.06 749.070   4
  -5   1 -12 7713.96 647.374   4
   1   4 -12 10451.0 774.818   4
  -4  -1 -12 7537.77 646.318   4
  -5   1  -9 3210.63 586.054   6
   4  -5  -9 2449.05 610.238   4
   5  -4  -9 2998.37 613.297   4
  -5   1  -9 2640.69 553.961   4
   1   4  -9 2745.08 600.580   4
  -4  -1  -9 3165.84 562.982   6
  -4  -1  -9 1621.20 511.537   4
  -1   5  -9 3069.73 606.331   4
  -5   1  -6 135275. 4086.66   2
  -1   5  -6 140894. 4553.88   2
   1   4  -6 143468. 4274.94   1
   1   4  -6 140055. 4558.69   2
  -5   1  -3 78569.2 2457.62   2
  -1   5  -3 74569.0 2239.73   1
   1   4  -3 77705.9 2435.43   1
  -4  -1  -3 75779.9 2240.78   2
   4  -5   0 44013.6 1033.57   7
  -4  -1   0 43952.9 1092.71   7
   1   4   0 42326.0 1357.19   1
  -5   1   0 44560.6 1343.73   2
  -1   5   0 40691.1 1283.65   1
   5  -4   0 42452.1 942.334   7
  -5   1   9 744.701 990.067   7
  -4  -1   9 1646.45 942.050   7
  -2   5 -13 2.74412 294.514   4
   2   3 -13 731.577 338.678   4
  -3  -2 -10 458.706 473.647   4
  -2   5 -10 989.170 535.336   4
  -5   2 -10 480.990 458.464   6
  -5   2 -10-253.552 465.655   4
   5  -3 -10-1.69121 550.329   4
   3  -5 -10 783.930 545.402   4
   2   3 -10 716.458 531.659   4
   5  -3  -7 7407.58 1132.18   1
  -3  -2  -4 115282. 2944.63   2
  -2   5  -4 114343. 2937.11   1
   2   3  -4 113821. 3356.33   1
  -5   2  -4 116184. 3399.44   2
  -2   5  -4 125012. 3763.87   2
  -2   5  -1 85755.1 2057.21   1
   2   3  -1 82778.7 2226.53   1
  -5   2  -1 84742.4 2268.93   2
  -3  -2  -1 84943.4 2098.39   2
  -3  -2   2 19907.6 917.111   7
   2   3   2 20989.1 863.866   1
   3   2 -11 1492.77 564.790   4
  -5   3 -11 2833.60 518.007   6
  -3   5 -11 1343.08 536.249   4
  -2  -3 -11 2058.26 536.101   4
   2  -5 -11 2384.04 577.296   4
  -5   3 -11 1945.07 509.201   4
   5  -2 -11 1707.02 586.239   4
  -2  -3  -8 3655.50 556.477   6
  -3   5  -8 3291.16 574.392   6
   3   2  -8 2673.38 525.111   4
  -3   5  -8 3140.19 538.367   4
  -2  -3  -8 2681.10 533.955   4
  -5   3  -8 2584.81 503.522   4
   5  -2  -8 2698.52 582.052   4
  -5   3  -8 4008.29 592.778   6
   2  -5  -8 2800.46 561.557   4
  -5   3  -5 25209.8 1568.75   2
   3   2  -5 22810.6 1524.49   2
   3   2  -5 20874.6 1517.65   1
  -3   5  -5 21732.3 1591.68   2
  -5   3  -2 21306.3 1188.76   2
  -3   5  -2 21542.9 859.408   1
   3   2  -2 21462.8 1172.53   1
  -3   5  -2 20109.9 1211.95   2
   3   2   1 87653.4 2031.35   1
  -2  -3   1 86315.6 2023.38   7
  -5   3   1 83365.8 2063.05   2
   2  -5   1 85372.3 2091.18   7
   4   1 -12-279.054 434.736   4
  -5   4 -12 166.049 376.762   4
   5  -1 -12-36.2587 423.061   4
  -4   5 -12-84.0925 391.465   4
   4   1  -9 1720.41 576.989   4
  -4   5  -9 1741.84 550.446   4
   5  -1  -9 572.585 492.188   4
   1  -5  -9 1902.17 589.101   4
  -5   4  -9 1995.42 560.343   4
  -1  -4  -9 1451.69 547.137   4
  -4   5  -9 2462.31 599.541   6
  -5   4  -9 2397.96 525.094   6
  -4   5  -6 7512.95 1037.95   2
  -5   4  -6 8439.77 1097.31   2
   4   1  -6 7784.94 1143.19   1
   5  -1  -6 7940.14 1164.38   1
   4   1  -3 14976.2 1167.96   1
  -5   4  -3 15772.4 1172.85   2
  -1  -4  -3 17058.0 746.363   2
  -4   5  -3 14733.9 1156.93   2
  -4   5  -3 15316.7 666.407   1
  -5   4   0 42422.0 1381.55   2
   4   1   0 42998.8 1327.08   1
   1  -5   0 44417.0 1145.40   7
  -4   5   0 41088.8 1377.69   2
  -1  -4   0 42593.0 1149.87   7
   1  -5   9 1701.98 891.405   7
  -1  -4   9 2259.66 1051.70   7
   5   0 -13 85.0365 308.404   4
   0  -5 -10 2036.32 569.675   4
  -5   5 -10 2801.17 611.063   4
  -5   5 -10 1596.47 508.100   6
   5   0 -10 1723.29 577.128   4
   5   0  -7-34.5281 684.951   1
  -5   5  -4 65249.6 2433.00   2
  -5   5  -4 43766.9 1075.12   1
  -5   5  -1 90.1540 529.213   2
   5   0   2 420971. 7666.77   1
   0  -5   2 431832. 8368.70   7
   6  -6 -12 12971.3 798.356   4
   0   6 -12 12109.6 815.633   4
   0   6  -9-323.001 486.921   4
  -6   0  -9-202.371 496.570   6
  -6   0  -9 116.421 446.365   4
   6  -6  -9 142.791 525.565   4
   0   6  -6 170621. 5490.63   2
   0   6  -3-233.716 494.708   1
  -6   0  -3-227.777 475.946   2
   6  -6   0 159956. 3038.61   7
   0   6   0 153190. 3572.20   1
  -6   0   3-118.986 380.618   7
  -1   6 -13 707.862 314.714   4
   1   5 -13 764.950 317.838   4
  -6   1 -10 4463.17 621.677   6
  -5  -1 -10 4164.89 642.982   4
   5  -6 -10 4548.94 705.866   4
  -1   6 -10 4517.16 723.139   4
   6  -5 -10 3728.96 687.523   4
  -6   1 -10 4145.80 625.791   4
   1   5 -10 5125.36 779.459   4
  -5  -1 -10 5291.67 634.250   6
   1   5  -4 24505.9 1435.35   1
  -5  -1  -4 25279.9 1333.43   2
  -6   1  -4 24332.4 1410.29   2
  -1   6  -4 24154.1 1656.35   2
  -1   6  -4 23410.5 1283.33   1
   1   5  -1 39402.6 1455.67   1
  -6   1  -1 36331.5 1400.14   2
  -5  -1  -1 38096.9 1407.34   2
  -1   6  -1 39871.6 1387.35   1
  -5  -1   2 104957. 2438.85   7
  -6   1   2 102311. 2324.31   7
  -5  -1   8 6123.71 1126.74   7
   6  -4 -11 466.846 535.639   4
  -2   6 -11 461.176 493.136   4
  -6   2 -11 1956.45 475.531   6
   4  -6 -11 1021.67 499.529   4
  -6   2 -11 698.186 443.174   4
   2   4 -11 438.196 517.579   4
  -4  -2 -11 1131.19 459.362   4
  -6   2  -8 4007.27 578.279   4
  -2   6  -8 5085.23 645.945   6
  -6   2  -8 4763.85 637.784   6
  -2   6  -8 4121.24 563.067   4
  -4  -2  -8 4596.53 588.415   6
  -4  -2  -8 4398.58 589.140   4
   6  -4  -8 3504.27 582.128   4
   4  -6  -8 4275.23 626.668   4
   2   4  -8 4717.63 618.961   4
  -6   2  -5 2520.45 660.375   2
  -4  -2  -5 3513.41 573.375   2
  -2   6  -5 2124.64 529.111   1
   2   4  -5 2851.57 763.384   1
  -2   6  -5 2289.56 834.798   2
   2   4  -5 2563.06 794.791   2
  -2   6  -2 344287. 6831.34   1
  -6   2  -2 334619. 7155.14   2
   2   4  -2 346724. 7137.07   1
  -4  -2  -2 337236. 6821.04   2
   2   4   1 446908. 8540.63   1
   4  -6   1 449113. 8476.43   7
  -4  -2   1 447793. 8315.85   7
  -2   6   1 476063. 8721.23   1
  -6   2   1 439959. 7986.87   7
  -3   6 -12 1061.47 439.463   4
  -6   3 -12 571.559 367.867   4
   3   3 -12 1444.93 495.228   4
   6  -3 -12 1458.05 490.408   4
  -6   3  -9 19642.8 1105.45   6
  -3  -3  -9 20994.4 1065.04   6
   3  -6  -9 18428.3 1147.45   4
  -6   3  -9 19586.6 1077.34   4
  -3   6  -9 18713.3 1090.87   4
   3   3  -9 18693.1 1115.70   4
   6  -3  -9 17706.2 1115.34   4
  -3   6  -9 20583.4 1116.59   6
  -3  -3  -9 18034.9 1065.21   4
   3   3  -6 22909.8 1786.18   2
  -3   6  -6 24830.5 1806.77   2
   3   3  -6 26328.9 1804.51   1
  -6   3  -6 25250.0 1694.31   2
   3   3  -3 1177.86 661.143   1
  -6   3  -3 490.682 607.667   2
  -3   6  -3 1429.09 414.517   1
  -3   6  -3 1532.67 714.780   2
  -3  -3  -3 1404.14 398.440   2
   3   3   0 147.452 441.731   1
  -3   6   0-32.8318 360.277   1
  -6   3   0 390.433 410.990   2
  -3  -3   0 49.8992 259.118   7
   3  -6   0 224.957 243.809   7
  -3  -3   9 18889.4 1998.61   7
   3  -6   9 18564.4 2022.43   7
  -4   6 -13 901.994 285.149   4
   4   2 -13 1312.01 365.560   4
   2  -6 -10 5576.49 709.904   4
  -2  -4 -10 5324.70 675.415   4
  -4   6 -10 5339.52 746.684   4
  -6   4 -10 4168.42 662.514   4
   4   2 -10 5026.31 727.631   4
  -6   4 -10 5881.82 683.227   6
   6  -2 -10 3639.01 713.951   4
  -4   6 -10 5401.00 668.821   6
  -4   6  -7 1414.54 696.993   2
   6  -2  -7 1435.05 709.428   1
  -4   6  -4 21418.4 924.901   1
  -2  -4  -4 21751.0 1011.98   2
  -6   4  -4 19875.1 1389.81   2
   4   2  -4 18630.0 1401.01   1
  -4   6  -4 21821.3 1511.72   2
  -4   6  -1 443825. 8723.50   2
   4   2  -1 406702. 8594.69   1
  -4   6  -1 457080. 8220.50   1
  -6   4  -1 411271. 8624.78   2
  -2  -4   2 344063. 6862.18   7
   2  -6   2 334310. 6938.70   7
   4   2   2 346180. 6513.20   1
  -2  -4   8 4792.48 1031.92   7
   5   1 -11 308.620 508.279   4
  -5   6 -11 853.738 450.647   6
  -6   5 -11 923.437 455.312   6
  -5   6 -11-459.342 482.832   4
  -1  -5 -11 1059.81 501.477   4
   6  -1 -11 77.3933 526.352   4
  -6   5 -11 291.313 429.329   4
   1  -6 -11 902.971 525.999   4
  -6   5  -8 8078.12 768.287   6
  -6   5  -8 6972.32 680.585   4
  -5   6  -8 6324.19 638.807   4
   6  -1  -8 6614.47 730.938   4
   5   1  -8 5997.57 667.595   4
  -1  -5  -8 4606.56 646.012   4
  -5   6  -8 6687.77 724.069   6
   1  -6  -8 5671.40 698.312   4
   5   1  -5 2332.51 821.449   1
  -6   5  -5 3144.05 790.216   2
  -5   6  -5 2706.19 764.008   2
  -6   5  -2 103012. 3017.14   2
  -5   6  -2 109209. 3081.97   2
  -5   6  -2 107539. 2346.85   1
   5   1  -2 107115. 3105.39   1
  -5   6   1 39157.9 1205.83   2
   1  -6   1 39539.0 1269.69   7
   5   1   1 37987.7 1225.81   1
  -1  -5   1 38646.4 1239.63   7
  -6   5   1 41032.8 1278.74   2
   6  -1   1 38376.6 1156.59   1
   6   0 -12 2616.79 537.189   4
  -6   6 -12 2297.36 453.702   4
  -6   6  -9 886.623 517.728   6
  -6   6  -9-136.079 441.380   4
   6   0  -9 62.9395 494.040   4
   0  -6  -9 237.790 491.756   4
   6   0  -6 2005.57 868.488   1
  -6   6  -6 1561.38 737.277   2
  -6   6  -3-230.521 627.918   2
  -6   6  -3 53.4414 137.713   1
   6   0   0 150078. 3430.18   1
  -6   6   0 156032. 3497.27   2
   0  -6   3-540.756 535.388   7
   0  -6   9 494.630 841.059   7
   0   7 -13 251.703 287.701   4
   0   7 -10 908.138 579.225   4
   7  -7 -10 1010.80 567.009   4
  -7   0 -10 936.900 531.511   6
   0   7  -7 335.041 702.128   2
  -7   0  -4 277180. 6425.92   2
   0   7  -4 261310. 6292.49   1
  -7   0  -1 83.0721 528.186   2
   0   7  -1 233.628 636.094   1
  -7   0   2 165385. 3480.77   7
   0   7   2 166311. 3900.34   1
  -7   0   5-343.668 530.379   7
  -7   0   8 9673.83 1296.25   7
   7  -6 -11 432.594 530.780   4
  -6  -1 -11 341.957 410.737   4
   1   6 -11-201.822 579.004   4
   6  -7 -11 818.168 577.374   4
  -6  -1 -11-29.0902 405.298   6
  -1   7 -11-432.790 528.005   4
  -7   1 -11 1432.83 485.884   6
  -1   7  -8 2939.34 553.054   6
  -6  -1  -8 2570.40 537.410   6
   6  -7  -8 2141.20 543.779   4
  -1   7  -8 2016.10 489.362   4
  -6  -1  -8 1846.00 496.865   4
   7  -6  -8 2273.56 604.902   4
  -7   1  -8 2448.38 546.833   6
   1   6  -8 2526.35 520.445   4
  -1   7  -5 30539.1 1639.88   1
  -1   7  -5 34018.2 2256.32   2
  -6  -1  -5 33723.1 1693.94   2
   1   6  -5 35305.2 2247.16   2
  -7   1  -5 33107.1 1817.16   2
   1   6  -5 32514.0 1861.80   1
   1   6  -2 146379. 3728.77   1
  -7   1  -2 155002. 3839.48   2
  -1   7  -2 144828. 3618.60   1
  -6  -1  -2 147444. 3653.42   2
   6  -7   1 86365.1 2176.05   7
  -1   7   1 86960.3 2405.10   1
   1   6   1 88487.0 2393.01   1
  -6  -1   1 90844.0 2027.69   7
  -7   1   1 89051.3 1882.09   7
  -6  -1   4 35218.9 1590.57   7
  -6  -1   7 10714.0 1230.93   7
   7  -5 -12 5627.58 613.962   4
  -2   7 -12 4804.06 563.617   4
   2   5 -12 5531.95 643.990   4
  -5  -2  -9 6519.37 696.725   6
   7  -5  -9 5012.75 701.260   4
   5  -7  -9 5803.08 730.342   4
  -2   7  -9 4880.23 651.073   6
  -2   7  -9 5593.83 701.237   4
  -7   2  -9 4928.65 620.276   4
  -7   2  -9 5426.11 681.777   6
  -5  -2  -9 5203.45 644.551   4
   2   5  -9 4748.84 688.327   4
   2   5  -6 9772.52 1198.65   1
   2   5  -6 10892.5 1290.42   2
  -2   7  -6 9927.56 1354.48   2
  -7   2  -6 9501.98 1077.97   2
  -2   7  -3 43707.8 1643.93   1
  -5  -2  -3 43127.8 1648.20   2
   2   5  -3 41463.9 1853.75   1
  -7   2  -3 45590.7 1916.41   2
  -2   7   0 75241.9 2089.75   1
  -7   2   0 76858.2 2228.64   2
  -5  -2   0 76129.8 1838.19   7
   5  -7   0 76742.4 1762.19   7
   2   5   0 80301.1 2226.28   1
   7  -5   0 72941.9 1527.79   7
  -5  -2   3 8241.44 719.810   7
  -5  -2   9 192.432 925.543   7
   3   4 -13 1855.01 376.612   4
  -3   7 -13 1506.65 325.940   4
   3   4 -10 1862.15 626.728   4
  -4  -3 -10 2515.59 512.243   6
  -3   7 -10 1625.78 564.875   4
   7  -4 -10 768.173 600.810   4
   4  -7 -10 1426.25 541.315   4
  -3   7 -10 1910.35 527.201   6
  -7   3 -10 1187.85 546.063   6
  -7   3 -10 772.499 450.653   4
  -4  -3 -10 817.478 454.073   4
   7  -4  -7 15285.8 1616.97   1
  -3   7  -7 15275.9 1575.56   2
  -4  -3  -4 67146.0 2175.52   2
   3   4  -4 63386.3 2544.19   1
  -7   3  -4 70334.6 2693.55   2
  -3   7  -4 66758.5 2105.08   1
  -3   7  -4 64481.9 2858.44   2
   3   4  -1 166641. 3954.18   1
  -3   7  -1 159416. 3655.61   1
  -7   3  -1 173804. 3991.68   2
  -4  -3   2 372631. 6810.41   7
   3   4   2 373898. 6768.16   1
  -4  -3   8 16251.9 1699.42   7
  -3  -4 -11 1878.78 509.394   4
  -4   7 -11 3901.46 528.418   6
  -7   4 -11 1697.22 499.690   4
   4   3 -11 2024.03 612.517   4
  -7   4 -11 3872.23 590.961   6
  -4   7 -11 2276.75 569.221   4
   3  -7 -11 2795.63 580.844   4
   7  -3 -11 2613.12 626.320   4
   3  -7  -8 17644.8 1056.74   4
  -3  -4  -8 17165.0 952.162   6
  -7   4  -8 18349.6 1048.57   6
   7  -3  -8 15776.4 989.798   4
  -4   7  -8 16952.2 1037.79   6
   4   3  -8 16295.5 980.520   4
  -4   7  -8 17231.8 971.471   4
  -7   4  -8 15663.2 923.642   4
  -3  -4  -8 14039.2 927.667   4
  -4   7  -5 3242.19 859.473   2
  -7   4  -5 3026.04 831.925   2
   4   3  -5 2892.24 812.446   1
   4   3  -2 386866. 8101.80   1
  -4   7  -2 379359. 7456.30   1
  -4   7  -2 381121. 8256.51   2
  -7   4  -2 399388. 8152.63   2
  -3  -4   1 172182. 3676.26   7
  -4   7   1 181697. 3820.13   2
   4   3   1 169126. 3814.96   1
  -7   4   1 183022. 3879.78   2
   3  -7   1 165425. 3727.94   7
  -3  -4   4 65833.6 2393.08   7
  -3  -4   7 14089.0 1487.91   7
   7  -2 -12 1638.17 500.421   4
   5   2 -12 159.182 415.555   4
  -7   5 -12 1437.66 398.987   6
  -7   5 -12 289.029 341.538   4
  -5   7 -12 373.607 373.088   4
  -7   5  -9 1394.06 534.722   6
  -2  -5  -9 492.565 464.365   4
   5   2  -9 1511.44 565.803   4
   7  -2  -9 789.873 512.573   4
  -7   5  -9 732.319 478.529   4
  -5   7  -9 1105.43 511.345   4
  -5   7  -9 936.289 536.634   6
   2  -7  -9 1323.94 561.848   4
  -7   5  -6 31684.0 2077.05   2
   5   2  -6 30588.9 2084.00   1
   7  -2  -6 28861.4 2150.91   1
  -5   7  -6 30077.9 2048.82   2
   5   2  -3 6152.30 935.306   1
  -5   7  -3 6726.74 994.388   2
  -5   7  -3 8955.42 558.666   1
  -7   5  -3 8684.16 1016.95   2
  -5   7   0 78918.4 2323.18   2
  -7   5   0 82527.9 2306.01   2
   2  -7   0 80089.8 1957.78   7
  -2  -5   0 80911.2 1992.33   7
   5   2   0 81166.7 2261.48   1
  -2  -5   3 46380.0 1792.78   7
  -2  -5   6 9952.35 1185.77   7
  -2  -5   9 5559.93 1342.90   7
   6   1 -13 1140.08 357.544   4
   1  -7 -10 612.938 485.215   4
  -6   7 -10-42.0156 489.981   4
  -1  -6 -10 593.911 528.297   4
   7  -1 -10 151.179 542.827   4
  -7   6 -10 246.212 473.972   4
  -7   6 -10-327.275 610.127   6
  -6   7 -10-566.105 616.524   6
   6   1 -10-476.569 558.421   4
   6   1  -7 11678.6 1470.89   1
  -6   7  -7 11999.6 1403.21   2
  -7   6  -7 11962.4 1373.33   2
   7  -1  -7 13047.5 1552.52   1
   6   1  -4 34704.8 2011.49   1
  -7   6  -4 36152.4 1948.81   2
  -6   7  -4 37955.8 1997.09   2
  -6   7  -1 81651.4 2560.03   2
  -7   6  -1 86037.6 2554.10   2
   6   1  -1 86623.8 2592.85   1
   7  -1   2 130779. 2719.03   1
   1  -7   2 145915. 3393.28   7
  -1  -6   2 144270. 3334.60   7
  -6   7   2 134771. 2756.40   2
   6   1   2 141813. 2929.21   1
  -1  -6   5 32008.2 1837.72   7
   1  -7   8 2868.03 881.688   7
  -1  -6   8 2229.10 822.653   7
  -7   7 -11-126.976 457.458   4
  -7   7 -11-221.231 476.203   6
   7   0 -11-499.270 523.354   4
   0  -7  -8 10626.7 838.244   4
   7   0  -8 11400.6 908.471   4
  -7   7  -8 10175.5 797.816   4
  -7   7  -8 12168.0 895.069   6
   7   0  -5 271.870 806.835   1
  -7   7  -5-242.761 703.691   2
  -7   7  -2 148383. 4006.92   2
   7   0   1 29.5313 425.703   1
   0  -7   1 309.689 399.727   7
  -7   7   1-235.193 448.863   2
   0  -7   4 269157. 6460.64   7
   0  -7   7-366.728 659.635   7
  -8   0 -11-123.865 442.262   6
   0   8 -11 26.3283 527.211   4
   8  -8 -11 4.72252 494.615   4
   0   8  -8 41529.0 1587.71   4
   0   8  -8 42377.0 1610.14   6
  -8   0  -8 41728.4 1596.13   6
   8  -8  -8 43158.9 1693.24   4
  -8   0  -5 173.766 559.934   2
   0   8  -5-242.453 567.135   1
   0   8  -5 1026.30 876.201   2
   0   8  -2 187455. 4528.71   1
  -8   0  -2 178975. 4566.70   2
   0   8   1 239.271 518.301   1
  -8   0   1-13.5822 227.408   7
   8  -8   1 25.4961 319.739   7
  -8   0   4 20796.9 1153.34   7
  -8   0   7-12.7398 493.279   7
  -1   8 -12 2726.69 519.488   4
  -8   1 -12 4569.37 457.157   6
   1   7 -12 3245.70 561.939   4
  -8   1  -9 10090.8 845.712   6
  -1   8  -9 9148.46 850.071   4
  -7  -1  -9 10759.8 853.634   6
   7  -8  -9 9037.07 879.190   4
   8  -7  -9 9085.93 887.732   4
   1   7  -9 9922.96 874.171   4
  -1   8  -9 10247.5 839.747   6
   1   7  -6 207575. 5768.14   1
  -1   8  -6 218294. 6691.60   2
  -8   1  -6 197485. 5671.35   2
   1   7  -6 206836. 6494.17   2
  -7  -1  -3 8402.35 879.713   2
  -1   8  -3 7940.52 849.721   1
   1   7  -3 7444.39 902.206   1
  -8   1  -3 8599.94 951.399   2
   1   7   0 86261.5 2540.66   1
   8  -7   0 83269.1 1733.90   7
  -1   8   0 81231.1 2375.34   1
  -8   1   0 80113.5 2601.47   2
   7  -8   0 80340.0 1848.33   7
  -8   1   3 5912.64 531.583   7
  -7  -1   3 6426.94 605.443   7
  -8   1   6 4584.02 807.627   7
  -7  -1   6 4307.25 775.204   7
  -2   8 -13 415.091 273.769   4
   2   6 -13 612.866 302.390   4
  -2   8 -10 3921.29 603.226   6
  -2   8 -10 2588.36 678.027   4
  -8   2 -10 3169.87 627.643   6
  -6  -2 -10 1936.16 495.059   4
  -6  -2 -10 3367.97 586.640   6
   8  -6 -10 2679.71 636.694   4
   2   6 -10 2898.15 647.183   4
   6  -8 -10 2002.96 641.446   4
  -2   8  -7 23.2687 692.216   2
  -8   2  -4 62035.2 2509.92   2
  -6  -2  -4 58528.2 2222.98   2
  -2   8  -4 63770.6 2255.47   1
   2   6  -4 60063.9 2485.71   1
  -2   8  -4 64402.0 2916.34   2
   2   6  -1 112782. 3129.82   1
  -8   2  -1 122502. 3266.18   2
  -2   8  -1 115643. 2974.88   1
  -6  -2   2 94561.1 2315.72   7
  -8   2   2 92460.2 2052.77   7
   2   6   2 90871.8 2531.99   1
  -6  -2   5 54363.1 2267.93   7
  -6  -2   8 1448.26 714.683   7
   3   5 -11 873.663 555.424   4
  -5  -3 -11 1061.11 387.491   6
  -8   3 -11 1645.93 502.741   6
   8  -5 -11 848.890 571.115   4
  -3   8 -11 737.928 513.549   4
  -5  -3 -11 795.331 417.201   4
   5  -8 -11 1366.00 534.107   4
   8  -5  -8 4567.94 632.950   4
  -5  -3  -8 6011.87 674.715   6
  -3   8  -8 4884.12 654.682   6
   5  -8  -8 5461.40 700.268   4
  -3   8  -8 4609.24 602.431   4
  -5  -3  -8 3716.52 556.445   4
  -8   3  -8 4868.86 629.355   6
   3   5  -8 4486.37 619.587   4
  -3   8  -5 24497.4 1293.63   1
  -5  -3  -5 25440.3 1368.34   2
   3   5  -5 21921.4 1650.13   1
  -3   8  -5 26736.2 2001.52   2
  -8   3  -5 21971.8 1595.95   2
  -3   8  -2 154845. 3654.21   1
  -5  -3  -2 159669. 3770.28   2
  -8   3  -2 151958. 4006.52   2
   3   5  -2 150618. 4030.35   1
   5  -8   1 156715. 3385.87   7
   3   5   1 145802. 3591.85   1
  -3   8   1 145765. 3644.32   1
  -8   3   1 140967. 3770.33   2
  -5  -3   1 155767. 3266.41   7
  -5  -3   4 3007.50 631.162   7
  -5  -3   7 8443.27 1104.70   7
   4   4 -12 391.319 459.183   4
  -4   8 -12-263.436 390.638   4
  -8   4 -12-642.364 369.915   6
   8  -4 -12 373.740 443.797   4
   4   4  -9 1939.99 591.512   4
  -4   8  -9 1953.23 573.310   4
  -8   4  -9 1196.93 550.079   6
   8  -4  -9 865.347 535.352   4
  -4  -4  -9 1847.33 506.470   4
  -4  -4  -9 3030.19 569.205   6
   4  -8  -9 2079.55 564.071   4
  -8   4  -9 2043.38 505.687   4
  -4   8  -9 1933.21 594.944   6
   4   4  -6 4317.98 946.879   1
  -4   8  -6 4645.83 996.012   2
  -8   4  -6 3706.96 865.324   2
   4   4  -6 3676.03 937.472   2
   4   4  -3 18850.3 1362.21   1
  -4   8  -3 22214.3 1515.21   2
  -8   4  -3 22210.5 1416.84   2
  -4   8  -3 20802.5 1006.06   1
  -4   8   0 49343.7 1722.66   2
   4  -8   0 46190.8 1334.73   7
   4   4   0 47738.8 1715.65   1
  -4  -4   0 45571.5 1409.95   7
  -8   4   0 50600.3 1765.92   2
  -4   8   0 46960.5 1628.19   1
  -4  -4   3 20793.1 1131.15   7
  -4  -4   6 3946.37 841.013   7
   5   3 -13 572.199 322.534   4
  -5   8 -10 9826.12 881.309   4
  -5   8 -10 11022.4 897.665   6
  -8   5 -10 10418.8 884.677   6
  -3  -5 -10 6965.55 789.323   4
  -8   5 -10 6452.15 741.358   4
   8  -3 -10 9365.96 894.566   4
   3  -8 -10 9888.77 850.487   4
   5   3 -10 9093.96 895.101   4
   8  -3  -7 8009.31 1287.59   1
   5   3  -7 8509.44 1231.83   1
  -5   8  -7 7109.98 1189.65   2
  -5   8  -4 3689.62 916.242   2
  -5   8  -4 3207.78 452.327   1
  -8   5  -4 2898.16 847.113   2
   5   3  -4 3538.08 912.434   1
  -5   8  -1 149825. 3555.11   1
   5   3  -1 153255. 3946.42   1
  -8   5  -1 159380. 4009.78   2
  -3  -5   2 152289. 3180.30   7
   3  -8   2 154866. 3346.08   7
   5   3   2 155625. 3061.54   1
  -3  -5   5 23858.3 1552.26   7
   3  -8   8 5510.88 1163.96   7
  -3  -5   8 5290.48 1091.44   7
  -8   6 -11 1442.98 522.954   6
   8  -2 -11 722.074 558.525   4
  -6   8 -11 770.612 483.487   4
  -6   8 -11 968.900 460.805   6
   6   2 -11 710.847 540.139   4
  -8   6 -11 914.430 417.308   4
   8  -2  -8 1583.83 554.092   4
   6   2  -8 1351.84 514.971   4
  -6   8  -8 1453.87 552.815   6
  -6   8  -8 1697.55 484.986   4
   2  -8  -8 1594.02 559.129   4
  -8   6  -8 2164.23 572.298   6
  -2  -6  -8 792.704 463.585   4
  -8   6  -8 1833.56 460.271   4
  -2  -6  -8 3008.23 566.464   6
  -8   6  -5 57812.8 2711.77   2
   6   2  -5 54327.0 2758.49   1
  -6   8  -5 55258.0 2702.95   2
  -8   6  -2 85889.6 2861.70   2
  -6   8  -2 92552.1 2273.67   1
   6   2  -2 90393.2 2963.82   1
   2  -8   1 119355. 2876.53   7
  -6   8   1 125192. 2942.66   2
   8  -2   1 115219. 2817.59   1
  -8   6   1 122692. 3028.19   2
  -2  -6   1 125565. 2876.14   7
   6   2   1 114637. 2909.01   1
   2  -8   4 57141.0 2373.58   7
  -2  -6   4 61930.8 2370.81   7
   2  -8   7 1396.25 791.291   7
  -2  -6   7 216.432 699.419   7
  -7   8 -12 1365.18 384.316   6
   8  -1 -12 910.421 468.894   4
  -8   7 -12 1469.47 389.374   6
  -8   7 -12 638.975 328.184   4
  -7   8 -12-143.379 337.646   4
   7   1 -12 502.733 455.337   4
  -7   8  -9 3724.97 699.875   6
  -1  -7  -9 3829.13 649.710   4
   7   1  -9 3827.31 669.768   4
   1  -8  -9 3245.71 638.858   4
  -8   7  -9 4578.67 733.045   6
   8  -1  -9 2757.93 607.964   4
  -8   7  -9 3846.92 625.845   4
  -7   8  -9 2934.48 590.069   4
   7   1  -6 5976.19 1153.84   1
   8  -1  -6 4811.92 1071.86   1
  -7   8  -6 4982.51 1057.14   2
  -8   7  -6 4703.99 1024.98   2
  -7   8  -3 5070.29 891.259   2
  -7   8  -3 6095.24 419.053   1
  -8   7  -3 6607.70 962.401   2
   7   1  -3 6234.24 1030.90   1
  -8   7   0 82567.0 2512.05   2
  -7   8   0 84539.3 2512.38   2
  -1  -7   0 84099.9 2177.77   7
   1  -8   0 83980.7 2134.84   7
   8  -1   0 81635.1 2451.18   1
   7   1   0 83617.2 2454.47   1
  -1  -7   3 8049.15 849.438   7
   1  -8   3 8787.39 882.602   7
  -1  -7   6 209767. 6035.98   7
   1  -8   6 212691. 6145.29   7
  -8   8 -10 4308.61 684.640   6
   8   0 -10 4603.58 717.149   4
   0  -8 -10 3956.98 659.293   4
  -8   8 -10 4159.71 639.315   4
  -8   8  -7 1010.31 737.578   2
   8   0  -7-169.826 759.227   1
   8   0  -4 22132.5 1781.40   1
  -8   8  -4 22392.7 1642.87   2
  -8   8  -1-338.074 622.586   2
   8   0  -1-512.261 718.566   1
   8   0   2 192483. 4003.85   1
   0  -8   2 187983. 4401.78   7
  -8   8   2 196059. 4058.52   2
   0  -8   5 107.486 661.548   7
   0  -8   8 42033.7 2660.73   7
  -9   0 -12 15466.4 701.663   6
   0   9 -12 12650.0 812.598   4
   9  -9  -9 640.995 588.770   4
   0   9  -9-156.957 497.703   4
  -9   0  -9 150.579 537.803   6
   0   9  -6 111012. 4664.32   2
   0   9  -3 190.012 613.844   1
  -9   0  -3-503.503 656.509   2
   9  -9   0 34573.8 973.426   7
   0   9   0 35094.5 1541.84   1
  -9   0   3-146.563 308.019   7
  -9   0   6 26011.2 1533.97   7
  -1   9 -13 530.840 256.046   4
   1   8 -13 453.296 274.139   4
  -8  -1 -10 2386.25 553.909   6
   9  -8 -10 2410.44 695.994   4
  -1   9 -10 2008.73 625.161   4
   8  -9 -10 797.379 563.158   4
   1   8 -10 1647.40 599.130   4
  -9   1 -10 2431.43 582.667   6
   9  -8  -7 11151.4 880.454   4
   8  -9  -7 13753.1 932.041   4
  -1   9  -7 13021.2 826.042   4
   1   8  -7 13882.8 852.006   4
  -1   9  -7 12009.5 1584.39   2
  -9   1  -7 13636.7 872.900   6
  -8  -1  -7 13182.8 865.737   6
   1   8  -7 14929.9 1730.37   2
  -1   9  -4 97139.0 3142.17   1
   1   8  -4 90822.9 3191.28   1
  -8  -1  -4 93609.9 3125.72   2
  -9   1  -4 94267.9 3328.27   2
   1   8  -1 278128. 6274.20   1
  -9   1  -1 286408. 6410.01   2
  -1   9  -1 277616. 6185.74   1
  -8  -1  -1 281793. 6304.27   2
  -1   9   2 17945.5 1137.83   1
  -9   1   2 18666.8 728.156   7
   1   8   2 18214.3 1082.88   1
  -8  -1   2 19896.8 838.640   7
  -8  -1   5 799.068 475.538   7
  -9   1   5 557.889 430.622   7
   7  -9 -11 1658.21 568.358   4
   9  -7 -11 2408.41 641.707   4
   2   7 -11 1466.15 586.125   4
  -9   2 -11 3837.35 591.579   6
  -7  -2 -11 1837.57 441.167   6
  -2   9 -11 2234.56 596.153   4
  -7  -2  -8 15752.6 987.468   6
   7  -9  -8 13236.3 1013.60   4
   9  -7  -8 11648.4 951.232   4
  -2   9  -8 13586.6 965.008   6
  -9   2  -8 13822.7 926.022   6
  -2   9  -8 13252.4 903.168   4
   2   7  -8 14992.7 950.076   4
  -2   9  -5 3001.25 657.690   1
  -2   9  -5 2755.37 983.326   2
   2   7  -5 2196.19 788.123   1
  -9   2  -5 3649.74 835.502   2
  -7  -2  -5 2951.01 717.981   2
  -9   2  -2 33632.7 1661.41   2
  -7  -2  -2 31139.1 1519.20   2
  -2   9  -2 32378.1 1444.34   1
   2   7  -2 30840.4 1590.13   1
   2   7   1 38529.6 1577.40   1
  -2   9   1 37723.2 1569.28   1
  -7  -2   1 39091.3 1229.70   7
   7  -9   1 39260.5 1305.20   7
  -9   2   4 8676.82 734.494   7
  -7  -2   4 9254.10 833.991   7
  -7  -2   7 9949.37 1173.95   7
  -9   3 -12 6637.08 521.255   6
  -3   9 -12 6183.76 598.954   4
   3   6 -12 5554.86 624.931   4
   6  -9  -9 6553.45 759.703   4
  -6  -3  -9 9117.64 791.710   6
   9  -6  -9 8122.59 840.297   4
  -9   3  -9 6377.21 725.427   6
  -3   9  -9 6147.22 755.935   4
   3   6  -9 5747.05 730.851   4
  -3   9  -9 6548.54 746.565   6
  -3   9  -6 6833.90 1218.71   2
   3   6  -6 6600.41 1058.66   1
   3   6  -6 5482.48 1180.17   2
  -9   3  -6 6080.60 1012.41   2
   3   6  -3 4345.78 809.810   1
  -3   9  -3 6646.04 1158.07   2
  -3   9  -3 4554.13 654.217   1
  -6  -3  -3 4919.68 688.956   2
  -9   3  -3 4019.50 778.734   2
   6  -9   0 14038.1 670.142   7
  -3   9   0 13851.6 919.431   1
   9  -6   0 12891.7 400.574   7
  -9   3   0 14571.3 1033.66   2
  -9   3   3 73361.8 1961.31   7
  -6  -3   3 78403.0 2260.83   7
  -6  -3   6 619.633 577.836   7
   4   5 -13 55.1830 269.933   4
  -4   9 -10 2223.10 583.205   6
  -5  -4 -10 1157.05 478.665   4
  -9   4 -10 1115.69 522.771   6
  -5  -4 -10 2469.73 499.699   6
   9  -5 -10 1164.61 616.236   4
   4   5 -10 2085.20 655.167   4
  -4   9 -10 1586.39 591.855   4
   5  -9 -10 1922.66 613.738   4
   9  -5  -7 105.885 786.355   1
  -4   9  -7 524.659 739.338   2
  -4   9  -4 31123.4 1403.61   1
  -4   9  -4 34515.7 2138.78   2
  -9   4  -4 30200.2 1806.40   2
   4   5  -4 30969.4 1846.33   1
  -4   9  -1 11856.8 822.068   1
   4   5  -1 10964.3 976.860   1
  -4   9  -1 10493.4 1083.24   2
  -9   4  -1 12359.5 1008.02   2
  -5  -4   2 34053.8 1253.44   7
  -9   4   2 32391.3 850.005   7
   4   5   2 34579.7 1379.32   1
  -5  -4   5 23745.2 1517.14   7
  -5  -4   8 13282.2 1514.63   7
   5  -9   8 13707.0 1645.59   7
  -5   9 -11 1356.61 436.117   6
  -5   9 -11 1262.89 512.532   4
  -9   5 -11 2030.71 536.633   6
   9  -4 -11 2020.19 604.149   4
   5   4 -11 1014.66 564.018   4
  -5   9  -8 11856.4 860.420   4
   9  -4  -8 13744.5 970.448   4
  -4  -5  -8 13907.0 899.479   6
   4  -9  -8 12796.7 929.016   4
   5   4  -8 13456.6 923.260   4
  -5   9  -8 14066.7 985.500   6
  -9   5  -8 14150.5 955.156   6
  -4  -5  -8 12474.9 847.351   4
   5   4  -5 24369.6 1803.09   1
  -9   5  -5 26744.7 1832.12   2
  -5   9  -5 24161.0 1864.37   2
  -5   9  -2 37298.5 1363.78   1
   5   4  -2 36043.8 1790.28   1
  -5   9  -2 34813.4 1861.76   2
  -9   5  -2 40728.5 1880.27   2
   5   4   1 10601.7 833.461   1
   4  -9   1 11636.9 740.711   7
  -4  -5   1 11362.4 736.760   7
  -5   9   1 12436.7 885.400   2
  -9   5   1 12186.3 903.316   2
  -4  -5   4 32386.1 1621.70   7
  -4  -5   7 223.810 605.959   7
   4  -9   7-140.273 688.897   7
   6   3 -12 1428.80 490.556   4
   9  -3 -12 1751.07 503.672   4
  -6   9 -12 1562.58 421.156   4
  -3  -6  -9 9865.97 765.603   6
  -3  -6  -9 9444.51 825.493   4
  -9   6  -9 10506.6 911.075   6
   6   3  -9 10365.4 906.121   4
  -6   9  -9 10949.5 941.121   6
  -6   9  -9 9951.46 871.266   4
   3  -9  -9 10935.5 912.244   4
  -9   6  -9 9050.46 821.003   4
   9  -3  -9 9509.21 897.000   4
   6   3  -6 1557.29 874.711   1
  -9   6  -6 467.630 617.357   2
   9  -3  -6 759.804 854.266   1
   6   3  -6 644.241 681.191   2
  -6   9  -6 228.404 682.836   2
  -6   9  -3 76122.3 2090.97   1
   6   3  -3 76426.9 2919.01   1
  -9   6  -3 79943.6 2915.71   2
   3  -9   0 14796.5 749.235   7
   6   3   0 14902.0 1063.86   1
  -6   9   0 14851.1 1092.37   2
  -3  -6   0 15700.5 861.091   7
  -9   6   0 14931.5 1063.86   2
   6   3   3 4206.11 476.924   1
   3  -9   3 4742.07 748.451   7
  -3  -6   3 3917.68 622.894   7
  -3  -6   6 5435.11 920.368   7
   3  -9   6 5113.51 967.391   7
   7   2 -13 749.107 312.077   4
  -7   9 -10 2753.62 631.482   4
   2  -9 -10 2913.55 628.974   4
   7   2 -10 2748.72 641.034   4
  -9   7 -10 3592.87 659.409   6
  -7   9 -10 3786.95 677.589   6
   9  -2 -10 2580.17 652.544   4
  -9   7 -10 1529.66 490.447   4
  -2  -7 -10 2977.66 584.793   4
   9  -2  -7 9846.37 1480.77   1
   7   2  -7 11521.7 816.335   4
  -9   7  -7 11196.8 814.778   6
   7   2  -7 11353.1 1520.38   1
  -7   9  -7 9528.46 1337.36   2
  -9   7  -7 9869.10 1332.33   2
   7   2  -4 9571.13 1264.69   1
  -7   9  -4 10929.0 1259.64   2
  -9   7  -4 9696.98 1238.66   2
   7   2  -1 36811.3 1729.14   1
  -9   7  -1 41505.1 1798.57   2
  -7   9  -1 38607.6 1787.07   2
   9  -2   2 30408.7 982.963   1
   2  -9   2 32255.6 1364.56   7
  -2  -7   2 30914.4 1303.17   7
  -7   9   2 33070.9 1068.92   2
   7   2   2 30747.7 1200.10   1
  -9   7   2 33331.0 1258.79   2
   2  -9   5 2950.67 790.122   7
  -2  -7   5 1911.33 668.334   7
  -2  -7   8 12637.7 1474.06   7
   2  -9   8 13869.1 1658.47   7
   9  -1 -11 290.848 496.218   4
  -9   8 -11 784.625 408.790   4
  -9   8 -11 800.488 479.113   6
  -8   9 -11 1490.84 657.436   6
  -8   9 -11 358.777 424.511   4
   8   1 -11 777.584 554.829   4
   8   1  -8 5732.87 696.122   4
  -9   8  -8 4629.99 591.462   4
  -9   8  -8 6411.21 748.697   6
  -8   9  -8 5358.06 643.310   4
  -1  -8  -8 5276.56 650.910   4
   9  -1  -8 5208.57 701.055   4
  -8   9  -8 5538.32 722.169   6
   1  -9  -8 5662.01 714.312   4
  -8   9  -5 561.278 773.385   2
  -9   8  -5 966.501 786.401   2
   9  -1  -5 254.567 758.107   1
   8   1  -5 890.023 864.588   1
  -8   9  -2 18298.1 1362.86   2
   8   1  -2 18734.8 1404.78   1
  -9   8  -2 17342.9 1316.59   2
   9  -1   1 280613. 5983.80   1
   8   1   1 276501. 5988.16   1
  -8   9   1 287013. 6100.67   2
  -1  -8   1 283239. 5926.54   7
  -9   8   1 302659. 6163.48   2
   1  -9   1 286675. 5970.03   7
  -1  -8   4 93706.3 3102.32   7
   1  -9   4 90935.3 3109.87   7
   1  -9   7 13503.8 1499.82   7
  -1  -8   7 12431.7 1411.05   7
  -9   9 -12 1472.25 390.261   6
  -9   9 -12 737.079 319.122   4
   9   0 -12 860.591 467.036   4
  -9   9  -9-255.709 554.923   6
   9   0  -9-354.590 529.167   4
   0  -9  -9 239.049 469.623   4
  -9   9  -9 298.915 462.881   4
  -9   9  -6 26511.7 2166.19   2
   9   0  -6 28851.8 2296.58   1
  -9   9  -3-185.860 714.874   2
   9   0  -3 59.7071 825.780   1
   0  -9   0 36039.0 1342.52   7
   9   0   0 34299.3 1611.01   1
  -9   9   0 37196.5 1710.34   2
   0  -9   3-65.4335 527.964   7
   0  -9   6 107672. 4006.22   7
   0  10 -10 34889.1 1572.40   4
 -10   0 -10 36577.9 1472.08   6
  10 -10 -10 33180.2 1518.14   4
  10 -10  -7 492.827 464.241   4
   0  10  -7 35.2760 987.052   2
   0  10  -7 112.817 378.979   4
 -10   0  -7-312.621 493.880   6
   0  10  -4 3010.75 784.071   1
 -10   0  -4 3035.20 795.737   2
 -10   0  -1 85.6133 656.448   2
   0  10  -1-110.579 618.329   1
 -10   0   2 138567. 3019.59   7
   0  10   2 129942. 3729.24   1
 -10   0   5-239.589 356.607   7
   1   9 -11 2001.15 631.643   4
  10  -9 -11 1704.38 569.917   4
  -9  -1 -11 1317.80 444.166   6
  -1  10 -11 1421.05 557.252   4
 -10   1 -11 1735.96 481.486   6
  10  -9  -8 38042.8 1635.58   4
   1   9  -8 39502.4 1564.22   4
  -9  -1  -8 38694.1 1570.96   6
  -1  10  -8 38241.6 1545.69   4
 -10   1  -8 36286.3 1526.80   6
   9 -10  -8 39781.6 1619.27   4
  -1  10  -5 50194.6 3099.08   2
  -1  10  -5 53846.5 2381.82   1
   1   9  -5 50955.4 2519.87   1
   1   9  -5 55670.6 3043.06   2
 -10   1  -5 50535.3 2501.39   2
  -9  -1  -5 51676.6 2482.45   2
   1   9  -2 28076.2 1560.47   1
 -10   1  -2 29287.0 1647.35   2
  -9  -1  -2 30308.9 1656.06   2
  -1  10  -2 29465.3 1530.09   1
   9 -10   1 115077. 2693.99   7
  10  -9   1 112180. 2653.73   7
  -9  -1   1 114219. 2615.79   7
   1   9   1 114282. 3251.89   1
 -10   1   4 22966.8 1099.40   7
  -9  -1   4 24403.6 1197.54   7
  -9  -1   7 16255.2 1346.20   7
   2   8 -12 4169.48 561.833   4
  -2  10 -12 3996.51 517.177   4
 -10   2 -12 5179.70 475.952   6
   2   8  -9 9405.84 865.341   4
   8 -10  -9 10064.6 919.317   4
  -2  10  -9 9905.86 881.263   6
  10  -8  -9 8551.47 894.513   4
 -10   2  -9 10140.0 880.149   6
  -8  -2  -9 10879.3 880.432   6
  -2  10  -9 9922.00 906.742   4
   2   8  -6 60584.4 3344.74   2
   2   8  -6 57590.0 2803.93   1
  -2  10  -6 62824.2 3410.56   2
 -10   2  -6 55794.3 2745.41   2
  -8  -2  -3 107664. 3364.78   2
  -2  10  -3 103195. 3130.17   1
 -10   2  -3 99827.2 3421.39   2
   2   8  -3 104457. 3403.42   1
   8 -10   0 48667.0 1311.25   7
  10  -8   0 43649.7 1038.03   7
 -10   2   0 49273.6 2063.16   2
   2   8   0 47009.1 1895.54   1
  -2  10   0 45838.1 1803.58   1
  -8  -2   3 10511.2 751.885   7
 -10   2   3 12142.3 650.927   7
 -10   2   6 10276.8 951.880   7
  -8  -2   6 11254.0 1102.20   7
   3   7 -13 2221.44 348.245   4
   3   7 -10 1896.02 647.364   4
  10  -7 -10 1569.48 604.353   4
 -10   3 -10 1531.14 580.024   6
  -3  10 -10 1780.51 534.528   6
  -7  -3 -10 1434.39 464.980   6
  -3  10 -10 1232.61 588.692   4
   7 -10 -10 1487.31 586.885   4
 -10   3  -7 4007.88 598.087   6
  -7  -3  -7 4270.12 594.989   6
   7 -10  -7 4487.96 640.797   4
  -3  10  -7 3937.09 1142.71   2
  10  -7  -7 4716.12 611.610   4
   3   7  -7 5125.48 597.410   4
  -3  10  -7 5203.64 562.463   4
  -7  -3  -4 60750.1 2315.53   2
  -3  10  -4 58491.4 2960.85   2
 -10   3  -4 53859.6 2496.08   2
   3   7  -4 52694.8 2451.87   1
  -3  10  -4 51547.2 2085.90   1
 -10   3  -1 304985. 6914.22   2
   3   7  -1 303117. 6751.62   1
  -3  10  -1 299151. 6528.91   1
  -7  -3   2 143366. 3243.97   7
   3   7   2 141483. 3527.38   1
 -10   3   2 132830. 2709.35   7
   7 -10   2 141573. 3504.99   7
  -7  -3   5 14556.1 1160.90   7
 -10   3   5 11257.1 926.892   7
   7 -10   8 30417.6 2330.66   7
  -7  -3   8 27103.3 2010.22   7
  10  -6 -11 3421.29 631.787   4
   4   6 -11 1299.73 599.411   4
  -4  10 -11 2600.58 492.295   6
  -6  -4 -11 2083.65 458.174   6
 -10   4 -11 2938.44 609.371   6
  -4  10 -11 2268.86 573.266   4
  -4  10  -8 13832.1 935.101   4
  10  -6  -8 12228.8 985.866   4
  -4  10  -8 14174.1 974.297   6
  -6  -4  -8 13889.7 906.593   6
   4   6  -8 13746.1 925.822   4
 -10   4  -8 11303.2 857.348   6
   6 -10  -8 11106.4 965.984   4
   4   6  -5 18142.2 1591.84   1
 -10   4  -5 17066.9 1529.48   2
  -4  10  -5 19551.4 1809.55   2
   4   6  -2 36689.3 1812.22   1
  -4  10  -2 40959.7 2075.55   2
  -4  10  -2 35259.4 1476.46   1
 -10   4  -2 37029.7 1788.26   2
 -10   4   1 4388.11 794.499   2
  -6  -4   1 4567.42 480.731   7
  -4  10   1 5332.07 746.117   1
   6 -10   1 4307.92 509.669   7
   4   6   1 4260.21 682.014   1
 -10   4   4 1277.18 373.141   7
  -6  -4   4 1362.18 501.643   7
  -6  -4   7 4371.73 819.996   7
   6 -10   7 3938.65 933.639   7
  -5  10 -12 368.580 379.571   4
 -10   5 -12-661.854 384.108   6
  10  -5 -12 291.240 419.678   4
   5   5 -12 655.739 464.914   4
   5 -10  -9 1311.22 621.946   4
   5   5  -9 885.593 538.683   4
  -5  -5  -9 1265.29 489.093   6
  -5  10  -9 297.502 488.496   4
  10  -5  -9 1499.73 608.068   4
  -5  10  -9 1164.37 554.847   6
 -10   5  -9 328.888 544.974   6
  -5  10  -6 26932.5 2181.22   2
   5   5  -6 27342.8 2068.41   1
   5   5  -6 27123.2 2179.38   2
 -10   5  -6 27277.5 1975.37   2
  -5  10  -3 67419.0 2102.05   1
  -5  10  -3 70686.0 2959.59   2
 -10   5  -3 67426.5 2700.94   2
   5   5  -3 63695.3 2612.75   1
  -5  10   0 954761. 17859.4   1
  -5  10   0 932177. 18078.1   2
 -10   5   0 904771. 18055.5   2
   5   5   0 965871. 17986.4   1
  -5  -5   0 949748. 17518.2   7
   5 -10   0 972206. 17354.4   7
   5 -10   3 69700.0 2351.77   7
   5   5   3 64703.7 1978.51   1
  -5  -5   3 63839.1 2068.00   7
  -5  -5   6 28449.8 1789.59   7
   5 -10   6 25912.2 1889.70   7
   6   4 -13 2895.93 370.742   4
  -4  -6 -10 8808.30 680.715   6
  -6  10 -10 8354.42 815.141   4
   4 -10 -10 9169.84 867.818   4
   6   4 -10 8131.58 853.810   4
 -10   6 -10 9484.07 831.520   6
  -6  10 -10 10500.7 871.169   6
  10  -4 -10 8532.22 852.014   4
  -6  10  -7 5508.19 1221.76   2
   4 -10  -7 5041.61 615.846   4
   6   4  -7 4624.03 1100.15   1
 -10   6  -7 4871.46 630.337   6
  10  -4  -7 5192.67 1194.50   1
  -6  10  -7 4565.01 538.713   4
  10  -4  -7 3647.32 573.471   4
   6   4  -7 4819.72 584.258   4
 -10   6  -7 5550.55 1071.32   2
   6   4  -4 672.932 728.278   1
  -6  10  -4 2048.42 446.202   1
 -10   6  -4 237.523 752.103   2
  -6  10  -4 750.185 859.267   2
  -6  10  -1 4925.84 622.122   1
  -6  10  -1 3741.02 796.769   2
 -10   6  -1 4068.01 783.209   2
   6   4  -1 3439.46 780.241   1
  -4  -6   2 36981.3 1383.26   7
   6   4   2 35856.2 1408.18   1
  10  -4   2 33478.1 1060.78   1
   4 -10   2 37953.1 1487.62   7
  -6  10   2 34453.9 1141.89   2
  -4  -6   5 15414.2 1313.62   7
   4 -10   5 16601.3 1425.29   7
  -4  -6   8 14121.6 1557.11   7
   4 -10   8 14144.4 1672.44   7
  -7  10 -11-600.178 476.931   6
  10  -3 -11 261.843 532.925   4
 -10   7 -11-205.534 477.972   6
  -7  10 -11-424.765 472.643   4
   7   3 -11 213.701 535.202   4
  -7  10  -8 29394.9 1328.36   4
   3 -10  -8 28042.8 1351.25   4
 -10   7  -8 30279.7 1413.61   6
   7   3  -8 30317.8 1373.56   4
 -10   7  -8 29785.8 1245.86   4
  10  -3  -8 28392.3 1355.44   4
  -3  -7  -8 32619.8 1302.78   6
  -7  10  -8 31394.3 1443.61   6
  -3  -7  -8 29642.5 1315.41   4
 -10   7  -5 15548.2 1515.89   2
   7   3  -5 13770.5 1510.77   1
  -7  10  -5 15886.6 1582.64   2
   7   3  -2 139940. 4086.50   1
  -7  10  -2 138824. 3322.79   1
 -10   7  -2 135139. 4015.37   2
 -10   7   1 322795. 6934.73   2
  -7  10   1 341221. 6833.41   2
   3 -10   1 315809. 6578.02   7
   7   3   1 318463. 6743.61   1
  10  -3   1 314096. 6619.06   1
  -3  -7   1 316635. 6507.64   7
   3 -10   4 55122.4 2353.32   7
  -3  -7   4 52506.6 2183.80   7
  -3  -7   7 4561.26 946.195   7
   3 -10   7 5551.22 1081.25   7
 -10   8 -12 1956.39 418.493   6
   8   2 -12 1718.45 479.778   4
  -8  10 -12 2422.95 417.555   6
  10  -2 -12 1996.77 484.134   4
  -8  10 -12 1073.42 356.446   4
  -2  -8  -9 754.573 475.673   4
   8   2  -9 655.281 548.404   4
  -8  10  -9 87.4523 545.682   6
 -10   8  -9 762.514 474.920   4
   2 -10  -9 476.555 523.569   4
 -10   8  -9 991.080 631.309   6
  10  -2  -9-192.956 564.443   4
  -8  10  -9 515.263 489.688   4
 -10   8  -6 11074.6 1459.88   2
  10  -2  -6 12375.0 1644.93   1
   8   2  -6 12148.8 1597.25   1
  -8  10  -6 11985.4 1500.39   2
  -8  10  -3 11562.0 1238.83   2
 -10   8  -3 10086.6 1167.96   2
   8   2  -3 11083.6 1234.96   1
   8   2   0 49708.3 1926.73   1
  10  -2   0 49544.0 1905.23   1
   2 -10   0 47441.0 1575.17   7
  -2  -8   0 48738.9 1631.41   7
  -8  10   0 51154.5 2005.97   2
 -10   8   0 52357.0 2009.28   2
  -2  -8   3 104410. 2998.68   7
   2 -10   3 103475. 3098.92   7
   8   2   3 102728. 2483.82   1
   2 -10   6 59786.5 2897.89   7
  -2  -8   6 58920.8 2774.11   7
 -10   9 -10 1686.89 491.383   4
  -9  10 -10 2841.28 655.460   6
   9   1 -10 1602.40 596.102   4
 -10   9 -10 919.414 575.365   6
  -9  10 -10 2279.24 564.349   4
  10  -1 -10 950.147 580.061   4
  10  -1  -7 19012.3 1041.33   4
   9   1  -7 14038.2 1720.91   1
  -9  10  -7 12810.9 1594.93   2
  10  -1  -7 16202.7 1858.12   1
  -9  10  -7 16342.9 887.467   4
  -9  10  -7 15622.1 987.557   6
   9   1  -7 15981.0 964.924   4
 -10   9  -7 16148.8 1797.58   2
 -10   9  -7 15557.4 979.034   6
   1 -10  -7 16258.2 958.040   4
  10  -1  -4 26362.8 2050.89   1
   9   1  -4 26830.1 2023.00   1
  -9  10  -4 24021.2 1778.64   2
 -10   9  -4 24025.7 1796.31   2
 -10   9  -1 114626. 3516.45   2
   9   1  -1 113044. 3488.16   1
  -9  10  -1 108745. 3453.89   2
  10  -1  -1 114013. 3484.08   1
  -9  10   2 30567.9 1178.37   2
  -1  -9   2 27941.4 1292.07   7
   9   1   2 27594.1 1170.65   1
   1 -10   2 26678.4 1290.93   7
  10  -1   2 27520.6 1085.92   1
 -10   9   2 29239.1 1228.63   2
  -1  -9   5 54233.2 2491.15   7
   1 -10   5 55432.8 2573.97   7
  -1  -9   8 37796.6 2515.88   7
   1 -10   8 39628.1 2627.47   7
  10   0 -11 55.8480 499.540   4
 -10  10 -11-396.762 492.938   6
 -10  10 -11-381.178 402.274   4
 -10  10  -8 28943.3 1393.48   6
   0 -10  -8 27206.1 1306.26   4
  10   0  -8 29472.8 1421.55   4
 -10  10  -8 26031.7 1230.94   4
 -10  10  -5-33.5821 794.637   2
  10   0  -5 269.075 919.729   1
 -10  10  -2 137708. 4163.76   2
  10   0  -2 140734. 4296.04   1
 -10  10   1-126.613 517.305   2
   0 -10   1-179.671 411.360   7
  10   0   1 91.2451 493.503   1
   0 -10   4 2613.40 692.403   7
   0 -10   7 48.7675 606.147   7
   0  11 -11 135.464 537.561   4
 -11   0 -11-450.740 439.502   6
 -11   0  -8 70244.9 2254.57   6
   0  11  -8 72668.9 2294.28   4
  11 -11  -8 74030.9 2351.11   4
   0  11  -5 707.147 685.712   1
 -11   0  -5 160.312 701.770   2
   0  11  -5 301.922 979.144   2
   0  11  -2 97551.5 3154.68   1
 -11   0  -2 97392.2 3367.43   2
  11 -11   1-7.42748 270.526   7
   0  11   1-32.3808 592.632   1
 -11   0   4 1075.84 387.265   7
 -10  -1 -12 1080.08 334.966   6
   1  10 -12 442.775 402.495   4
  -1  11 -12 413.967 391.265   4
 -11   1 -12 697.136 328.068   6
 -11   1  -9 25234.4 1277.44   6
 -10  -1  -9 23885.0 1235.27   6
  11 -10  -9 21306.7 1300.35   4
   1  10  -9 22975.7 1305.31   4
  -1  11  -9 21965.9 1238.70   6
  -1  11  -9 21814.7 1244.58   4
  10 -11  -9 20838.0 1317.80   4
 -11   1  -6 30352.2 2015.36   2
  -1  11  -6 33329.5 2622.42   2
   1  10  -6 26083.8 2426.53   2
   1  10  -6 29697.5 1967.84   1
 -10  -1  -3 3462.66 846.052   2
 -11   1  -3 4257.69 907.211   2
   1  10  -3 4015.89 831.513   1
  -1  11  -3 4468.95 806.570   1
   1  10   0 5201.25 832.637   1
  -1  11   0 5883.01 858.150   1
  11 -10   0 5407.49 345.525   7
  10 -11   0 5717.92 417.974   7
 -10  -1   3 3034.04 459.271   7
 -11   1   3 3168.26 411.587   7
 -10  -1   6 8066.44 886.932   7
  -2  11 -10 10146.2 913.022   4
  -2  11 -10 10970.3 850.820   6
   2   9 -10 10925.0 935.346   4
  -9  -2 -10 9514.70 789.720   6
  11  -9 -10 10615.8 962.802   4
 -11   2 -10 11191.4 899.592   6
   9 -11 -10 10107.7 917.640   4
 -11   2  -7 14089.1 934.766   6
   9 -11  -7 14957.4 965.888   4
  -2  11  -7 15335.8 926.341   4
   2   9  -7 13609.8 1992.42   2
  -2  11  -7 13384.9 1895.13   2
  -9  -2  -7 15171.0 946.088   6
   2   9  -7 14751.9 921.275   4
  11  -9  -7 14475.8 965.571   4
  -2  11  -4 140809. 5307.04   2
   2   9  -4 149794. 4627.92   1
  -9  -2  -4 156581. 4569.41   2
 -11   2  -4 155986. 4813.17   2
  -2  11  -4 155583. 4356.51   1
 -11   2  -1 15800.0 1259.87   2
   2   9  -1 14995.1 1141.75   1
  -2  11  -1 15070.4 1092.03   1
   9 -11   2 63566.9 2064.93   7
   2   9   2 67117.0 2310.34   1
  -9  -2   2 63760.6 1816.34   7
  -2  11   2 61641.9 2303.38   1
 -11   2   2 61890.6 1517.41   7
  -9  -2   5-73.4601 397.499   7
 -11   2   5-153.861 315.981   7
   9 -11   8 4552.10 1076.44   7
 -11   3 -11 7536.45 705.370   6
  -3  11 -11 5129.03 687.675   4
   3   8 -11 5035.75 705.750   4
  -8  -3 -11 5711.93 583.371   6
  11  -8 -11 4853.99 680.975   4
 -11   3  -8 32379.3 1448.09   6
  -8  -3  -8 32254.8 1394.91   6
  11  -8  -8 34008.0 1542.28   4
  -3  11  -8 33321.0 1440.14   4
   3   8  -8 31878.4 1439.33   4
   8 -11  -8 33491.1 1496.62   4
  -3  11  -5 15392.9 1764.61   2
   3   8  -5 12386.9 1391.51   1
 -11   3  -5 13515.8 1421.07   2
  -8  -3  -5 13700.4 1233.41   2
  -3  11  -5 13534.8 1132.32   1
  -3  11  -2 60039.0 2176.85   1
   3   8  -2 60801.8 2441.90   1
 -11   3  -2 61940.3 2508.93   2
   8 -11   1 168143. 3760.10   7
  -3  11   1 164409. 4247.90   1
   3   8   1 157503. 4248.05   1
  -8  -3   1 169402. 3709.06   7
  -8  -3   4 38427.1 1614.65   7
 -11   3   4 36014.0 1315.20   7
  -8  -3   7 13392.0 1289.71   7
   8 -11   7 15886.1 1579.02   7
   4   7 -12 533.598 419.121   4
  -4  11 -12-516.974 378.238   4
 -11   4 -12-469.304 352.843   6
  -4  11  -9 11224.1 938.508   6
   7 -11  -9 10146.1 940.485   4
 -11   4  -9 9284.59 839.049   6
  -7  -4  -9 11747.7 876.966   6
  -4  11  -9 10091.2 898.558   4
   4   7  -9 10640.0 951.666   4
  11  -7  -9 10380.0 927.216   4
   4   7  -6 66980.4 3191.33   1
  -4  11  -6 68289.7 3562.32   2
 -11   4  -6 58295.1 3100.44   2
   4   7  -6 66664.7 3582.81   2
 -11   4  -3 26715.7 1726.04   2
  -4  11  -3 24222.4 1881.04   2
   4   7  -3 24154.4 1631.58   1
  -4  11  -3 23384.1 1276.46   1
   7 -11   0 233797. 3573.62   7
   4   7   0 236825. 4498.49   1
  -4  11   0 225600. 4315.44   1
  -7  -4   3 7146.55 674.172   7
   7 -11   3 8867.53 895.357   7
   4   7   3 8474.06 805.891   1
 -11   4   3 8085.37 464.735   7
   7 -11   6 41092.6 2352.20   7
  -7  -4   6 42158.3 2110.20   7
   5   6 -13 189.688 257.522   4
 -11   5 -10 21795.6 1205.42   6
  -6  -5 -10 20372.7 1039.47   6
  11  -6 -10 22283.8 1237.40   4
  -5  11 -10 18886.3 1187.68   4
  -5  11 -10 22594.2 1184.76   6
   5   6 -10 21198.0 1247.02   4
  11  -6  -7 18421.4 1081.26   4
  -6  -5  -7 19629.5 1021.34   6
  -5  11  -7 19379.0 991.199   4
 -11   5  -7 19088.3 1038.81   6
   6 -11  -7 19475.0 1063.94   4
  11  -6  -7 18540.1 2018.41   1
  -5  11  -7 18786.6 1917.62   2
   5   6  -7 17788.5 997.748   4
   5   6  -7 17333.7 1751.04   1
   5   6  -4 66797.9 2902.44   1
 -11   5  -4 68112.0 2935.57   2
  -5  11  -4 66538.8 2299.53   1
 -11   5  -1 32218.7 1679.64   2
   5   6  -1 32517.6 1712.40   1
  -5  11  -1 33129.5 1832.35   2
  -5  11  -1 32658.0 1443.95   1
   6 -11   2 4286.82 622.287   7
  -6  -5   2 3867.86 538.198   7
  -5  11   2 4023.68 538.203   2
   5   6   2 3950.78 638.608   1
   6 -11   5 3202.58 772.871   7
  -6  -5   5 3854.96 700.817   7
  -6  -5   8 19798.9 1694.74   7
   6 -11   8 15423.1 1708.38   7
  -6  11 -11 1850.91 526.899   4
   6   5 -11 695.883 550.564   4
  11  -5 -11 1832.52 594.443   4
 -11   6 -11 2270.11 544.356   6
  -6  11 -11 563.381 422.714   6
  -6  11  -8 19890.0 1171.85   6
  -5  -6  -8 21690.3 1113.80   6
  11  -5  -8 19545.6 1158.20   4
 -11   6  -8 21145.2 1177.45   6
   6   5  -8 19255.1 1139.83   4
   5 -11  -8 18450.6 1144.75   4
  -6  11  -8 18289.2 1049.25   4
 -11   6  -5 4832.69 1020.28   2
  -6  11  -5 4085.75 1091.43   2
   6   5  -5 3020.08 946.583   1
 -11   6  -2 3233.66 814.524   2
   6   5  -2 3359.73 849.459   1
  -6  11  -2 4272.15 974.020   2
  -6  11  -2 4407.98 594.260   1
  -6  11   1 36284.9 1577.75   2
 -11   6   1 36080.0 1668.48   2
   5 -11   1 33312.9 1312.19   7
  -5  -6   1 32202.0 1272.46   7
   6   5   1 31080.0 1502.96   1
   5 -11   4 69538.5 2694.56   7
  -5  -6   4 65964.1 2417.82   7
   5 -11   7 19357.4 1749.07   7
  -5  -6   7 17839.2 1534.51   7
  11  -4 -12 3497.58 539.827   4
 -11   7 -12 4950.24 497.720   6
   7   4 -12 3774.14 558.574   4
  -7  11 -12 3141.14 448.659   4
  -7  11 -12 5137.89 460.532   6
  -7  11  -9 2584.53 614.924   4
  -7  11  -9 4058.68 698.257   6
  -4  -7  -9 3666.73 581.345   6
  11  -4  -9 3280.00 680.411   4
   4 -11  -9 3439.68 651.678   4
 -11   7  -9 3122.34 606.450   6
   7   4  -9 3802.47 689.939   4
   7   4  -6 43903.8 2710.60   1
  11  -4  -6 41778.6 2835.37   1
  -7  11  -6 40020.8 2669.64   2
 -11   7  -6 44217.8 2665.07   2
  -7  11  -3 9695.25 1223.54   2
 -11   7  -3 7355.40 1143.65   2
  -7  11  -3 8635.16 711.194   1
   7   4  -3 8686.28 1190.83   1
 -11   7   0 233957. 5616.21   2
  -7  11   0 241244. 5685.88   2
   4 -11   0 239770. 5025.53   7
  -4  -7   0 235356. 5134.10   7
   7   4   0 232765. 5526.39   1
   7   4   3 24304.2 1114.62   1
   4 -11   3 23831.0 1359.78   7
  -4  -7   3 24575.6 1282.53   7
  -4  -7   6 68235.9 2944.35   7
   4 -11   6 71486.4 3203.18   7
  -8  11 -10 20889.0 1210.49   6
   8   3 -10 16644.5 1123.18   4
  -8  11 -10 17385.0 1070.98   4
 -11   8 -10 18528.8 1131.48   6
  11  -3 -10 16944.1 1130.28   4
   8   3  -7 16398.9 977.783   4
  -8  11  -7 14531.3 1802.60   2
   3 -11  -7 16485.9 983.487   4
  11  -3  -7 14206.4 1876.61   1
   8   3  -7 13662.8 1727.44   1
 -11   8  -7 13166.9 1615.18   2
  11  -3  -7 16121.1 986.780   4
  -3  -8  -7 17162.9 922.150   6
  -8  11  -7 16264.5 892.328   4
 -11   8  -7 15188.7 953.147   6
  -8  11  -4 36132.7 2241.25   2
 -11   8  -4 39536.6 2257.02   2
   8   3  -4 36467.5 2219.94   1
 -11   8  -1 176398. 4669.31   2
   8   3  -1 169710. 4544.70   1
  -8  11  -1 162336. 4547.45   2
 -11   8   2 65187.9 2196.92   2
  11  -3   2 61755.7 1746.64   1
  -8  11   2 66039.1 1862.78   2
  -3  -8   2 63848.3 2054.16   7
   8   3   2 64461.4 2072.88   1
   3 -11   2 63192.6 2110.58   7
  -3  -8   5 13292.2 1229.49   7
   3 -11   5 13107.1 1278.09   7
  -3  -8   8 32979.8 2291.48   7
   3 -11   8 32024.0 2428.84   7
  -9  11 -11 4151.36 569.544   4
  11  -2 -11 5762.97 704.849   4
  -9  11 -11 6123.58 667.534   6
 -11   9 -11 6929.49 708.524   6
   9   2 -11 4503.01 689.724   4
   2 -11  -8 3323.00 663.881   4
 -11   9  -8 4121.23 557.587   4
   9   2  -8 3590.65 673.152   4
 -11   9  -8 4720.24 693.033   6
  -9  11  -8 3904.67 644.218   6
  -2  -9  -8 3615.13 624.249   4
  11  -2  -8 3552.69 672.326   4
  -9  11  -8 4674.74 621.817   4
  -2  -9  -8 4375.61 574.065   6
  11  -2  -5-862.506 998.743   1
  -9  11  -5-56.4382 787.175   2
   9   2  -5-71.7316 721.434   1
 -11   9  -5 272.350 744.769   2
   9   2  -2 63632.0 2646.55   1
 -11   9  -2 57565.5 2517.08   2
  -9  11  -2 55775.8 2489.70   2
  -9  11   1 17174.9 1135.35   2
  -2  -9   1 16350.6 974.689   7
   2 -11   1 16670.2 980.253   7
  11  -2   1 17165.5 1093.47   1
 -11   9   1 16024.2 1102.47   2
   9   2   1 16621.9 1086.63   1
   2 -11   4 154268. 4391.45   7
  -2  -9   4 150004. 4266.20   7
   2 -11   7 14885.9 1569.23   7
  -2  -9   7 14853.8 1519.75   7
  10   1 -12 3336.68 511.200   4
 -10  11 -12 3781.52 445.281   6
  11  -1 -12 3444.35 513.607   4
 -11  10 -12 4226.77 460.091   6
  11  -1  -9 2121.34 615.945   4
 -10  11  -9 2912.07 584.331   4
 -11  10  -9 1640.65 515.874   4
 -10  11  -9 3070.29 708.035   6
 -11  10  -9 2866.65 666.461   6
  10   1  -9 1799.72 624.143   4
 -10  11  -6 6334.20 1367.90   2
  10   1  -6 9641.41 1547.60   1
 -11  10  -6 7383.59 1315.59   2
  11  -1  -6 9097.99 1509.55   1
  11  -1  -3 3058.66 1002.59   1
 -10  11  -3 2545.74 880.960   2
 -11  10  -3 2782.31 912.729   2
  10   1  -3 2671.77 1033.36   1
  11  -1   0 5298.66 863.149   1
  -1 -10   0 5804.84 652.528   7
  10   1   0 5585.09 878.030   1
 -11  10   0 6530.22 901.468   2
   1 -11   0 6477.41 676.793   7
 -10  11   0 7869.45 997.239   2
  -1 -10   3 2760.42 608.325   7
   1 -11   3 4152.02 743.070   7
   1 -11   6 28572.2 1980.50   7
  -1 -10   6 28516.7 1944.62   7
 -11  11 -10 7552.35 752.796   4
  11   0 -10 8618.61 888.456   4
 -11  11  -7 412.407 862.699   2
   0 -11  -7 461.567 451.376   4
  11   0  -7 126.403 454.109   4
 -11  11  -7-595.512 508.121   6
  11   0  -7 937.036 927.623   1
 -11  11  -7-22.9649 371.385   4
 -11  11  -4 857.613 814.889   2
  11   0  -4 862.751 933.780   1
 -11  11  -1 424.288 761.562   2
  11   0  -1 217.471 688.773   1
   0 -11   2 95482.9 2829.44   7
  11   0   2 92430.7 2602.97   1
   0 -11   5-520.447 602.515   7
   0 -11   8 69786.5 3472.84   7
   0  12 -12 11189.3 711.387   4
 -12   0 -12 13292.9 637.995   6
 -12   0  -9 502.801 569.662   6
  12 -12  -9 634.921 610.176   4
   0  12  -9-33.9802 597.141   4
   0  12  -9 456.669 487.588   6
 -12   0  -6 32659.8 2222.22   2
   0  12  -6 36806.3 2853.06   2
   0  12  -3-966.673 644.154   1
 -12   0  -3 1922.07 894.795   2
   0  12   0 133069. 3929.72   1
  12 -12   0 134349. 2843.01   7
  12 -12   3-213.821 506.497   7
 -12   0   3 202.749 294.476   7
  -1  12 -10 32992.0 1521.79   4
   1  11 -10 33181.5 1506.81   4
 -12   1 -10 32943.3 1416.49   6
  12 -11 -10 31328.8 1481.66   4
 -11  -1 -10 30679.9 1349.24   6
   1  11  -7 1299.32 481.451   4
   1  11  -7 1363.51 1097.63   2
 -12   1  -7 1151.44 528.323   6
  12 -11  -7 1207.75 545.549   4
  -1  12  -7 959.569 1073.18   2
  -1  12  -7 877.367 561.492   4
  11 -12  -7 2174.20 596.698   4
 -11  -1  -7 1163.38 506.586   6
 -11  -1  -4 39883.9 2223.10   2
  -1  12  -4 38229.9 2064.68   1
 -12   1  -4 40143.2 2284.10   2
   1  11  -4 37210.7 2125.20   1
 -12   1  -1 89402.2 3330.95   2
   1  11  -1 95936.7 3153.30   1
  -1  12  -1 92970.1 3055.70   1
   1  11   2 73932.1 2700.44   1
  -1  12   2 73224.0 2668.36   1
  11 -12   2 74982.3 2304.16   7
 -12   1   2 73592.3 1856.56   7
  12 -11   2 76011.9 2291.80   7
 -11  -1   2 75532.5 2020.14   7
 -11  -1   5 31360.8 1451.44   7
  11 -12   8 28764.0 2282.87   7
   2  10 -11 3200.89 621.372   4
 -10  -2 -11 3432.54 518.065   6
 -12   2 -11 3764.80 569.683   6
  -2  12 -11 3335.33 653.218   4
   2  10  -8 15641.6 1038.36   4
  10 -12  -8 15468.3 1043.78   4
  12 -10  -8 16054.8 1066.90   4
  -2  12  -8 16046.9 1028.29   4
 -10  -2  -8 15018.7 1014.33   6
 -12   2  -8 15061.1 1034.07   6
 -12   2  -5 26495.8 2054.29   2
   2  10  -5 28766.9 2016.01   1
  -2  12  -5 31355.8 1834.91   1
  -2  12  -5 31949.9 2484.65   2
 -10  -2  -5 29126.8 1941.94   2
   2  10  -2 36878.0 1913.74   1
  -2  12  -2 33958.6 1736.95   1
 -12   2  -2 34942.2 1959.06   2
 -10  -2   1 6378.89 541.264   7
  10 -12   1 6791.18 560.074   7
  -2  12   1 6345.09 882.027   1
   2  10   1 6771.46 869.063   1
  12 -10   1 5277.89 471.453   7
  10 -12   4 4668.55 789.063   7
 -10  -2   4 4206.36 565.196   7
  10 -12   7 17624.1 1677.52   7
  -3  12 -12 4564.98 527.473   4
 -12   3 -12 6172.50 509.802   6
  -9  -3 -12 6552.45 448.280   6
   3   9 -12 5575.86 605.835   4
  12  -9  -9 17224.3 1220.49   4
  -9  -3  -9 21011.6 1139.44   6
   9 -12  -9 19818.1 1221.52   4
  -3  12  -9 19298.6 1180.66   6
 -12   3  -9 20127.3 1158.95   6
   3   9  -9 19636.1 1227.91   4
  -3  12  -9 20116.3 1193.27   4
   3   9  -6 37448.0 2744.37   2
   3   9  -6 34581.8 2304.89   1
 -12   3  -6 33334.8 2253.52   2
  -3  12  -6 36452.4 2744.71   2
 -12   3  -3 25278.3 1755.61   2
   3   9  -3 26060.7 1723.27   1
  -3  12  -3 25807.6 1482.88   1
   3   9   0 12587.5 1064.41   1
  -3  12   0 10125.4 975.492   1
   9 -12   0 11782.9 663.796   7
 -12   3   0 12768.6 1214.32   2
   3   9   3 37198.6 1757.67   1
   9 -12   3 39857.0 1822.74   7
 -12   3   3 38751.0 1137.01   7
  -9  -3   3 40376.3 1526.44   7
  -9  -3   6 20508.9 1402.90   7
   9 -12   6 21788.7 1734.33   7
  12  -8 -10 9105.18 885.333   4
  -4  12 -10 10040.2 811.164   6
  -8  -4 -10 9379.83 767.821   6
  -4  12 -10 8568.00 855.962   4
   4   8 -10 9800.55 908.871   4
 -12   4 -10 9583.39 855.346   6
   8 -12  -7 9255.30 793.435   4
   4   8  -7 5804.04 1610.78   2
  12  -8  -7 9370.57 825.468   4
  -8  -4  -7 9853.08 798.926   6
 -12   4  -7 7989.37 725.021   6
   4   8  -7 8437.46 720.520   4
  -4  12  -7 8284.26 1468.96   2
  -4  12  -7 8456.31 700.756   4
   4   8  -4 83261.9 3259.28   1
  -4  12  -4 78779.3 2749.24   1
 -12   4  -4 81066.4 3324.74   2
   4   8  -1 2482.59 796.990   1
 -12   4  -1 3019.21 830.072   2
  -4  12  -1 2448.27 594.372   1
   4   8   2 19280.1 1204.78   1
   8 -12   2 18199.3 1042.06   7
  -4  12   2 20780.7 1122.92   2
  -8  -4   2 18736.8 971.931   7
   8 -12   5 9993.64 1181.07   7
  -8  -4   5 9354.88 920.667   7
   8 -12   8 3087.42 969.499   7
  -5  12 -11 1177.55 485.766   4
  12  -7 -11 891.408 536.407   4
  -7  -5 -11 1389.30 408.461   6
 -12   5 -11 1645.24 516.185   6
  -5  12 -11 102.859 470.358   6
   5   7 -11 371.741 556.661   4
 -12   5  -8 16432.0 1066.77   6
   5   7  -8 16042.0 1065.19   4
  -7  -5  -8 18619.6 1047.64   6
  12  -7  -8 15150.1 1959.29   1
  -5  12  -8 17535.1 1045.47   4
   7 -12  -8 19597.7 1121.04   4
  12  -7  -8 19061.7 1183.18   4
  -5  12  -8 18113.5 1118.42   6
   5   7  -5 9507.33 1322.13   1
  -5  12  -5 12143.8 1588.85   2
 -12   5  -5 10618.3 1327.33   2
 -12   5  -2 150472. 4368.11   2
   5   7  -2 149648. 4367.05   1
  -5  12  -2 145364. 3867.86   1
 -12   5   1 7997.42 990.037   2
  -7  -5   1 7470.04 642.640   7
   7 -12   1 7008.88 630.413   7
  -5  12   1 6884.12 864.994   1
   5   7   1 7412.36 849.777   1
  -5  12   1 7530.26 851.498   2
  -7  -5   4 11340.4 959.662   7
   7 -12   4 13848.1 1216.15   7
   7 -12   7 7744.22 1209.27   7
  -7  -5   7 7600.12 1041.33   7
 -12   6 -12 182.959 363.580   6
  -6  12 -12 310.095 341.161   4
   6   6 -12 670.748 410.017   4
   6 -12  -9 10489.3 937.876   4
   6   6  -9 9693.26 942.466   4
  -6  12  -9 9862.59 888.714   4
 -12   6  -9 9166.78 844.129   6
  -6  -6  -9 9915.32 804.332   6
  -6  12  -9 10463.8 934.403   6
  12  -6  -9 9482.58 917.308   4
 -12   6  -6 10009.1 1329.53   2
   6   6  -6 9864.25 1429.25   1
  -6  12  -6 10539.6 1528.28   2
   6   6  -3 14613.8 1393.42   1
  -6  12  -3 16361.5 1048.77   1
 -12   6  -3 17880.7 1447.70   2
  -6  12  -3 16222.0 1707.18   2
 -12   6   0 7853.54 960.617   2
   6 -12   0 8864.95 654.875   7
   6   6   0 7638.92 925.186   1
  -6  12   0 7406.27 901.314   2
  -6  12   0 8214.47 890.454   1
   6 -12   3 17141.5 1180.91   7
  -6  -6   3 15516.1 1054.87   7
   6   6   3 17739.0 1067.93   1
  -6  -6   6 10831.3 1114.62   7
   6 -12   6 11332.0 1376.56   7
   7   5 -10 3754.91 688.596   4
  -7  12 -10 3208.15 629.929   4
 -12   7 -10 3159.60 647.531   6
  -5  -7 -10 3388.64 544.295   6
  -7  12 -10 4010.67 658.747   6
  12  -5 -10 3026.44 674.858   4
 -12   7  -7 9500.96 790.874   6
 -12   7  -7 9816.10 1339.09   2
  12  -5  -7 5829.42 1313.30   1
  -5  -7  -7 8663.21 704.440   6
   7   5  -7 8559.07 746.960   4
   5 -12  -7 9163.48 770.133   4
  -7  12  -7 9121.00 1476.90   2
  -7  12  -7 7499.23 667.036   4
  12  -5  -7 8057.05 763.080   4
   7   5  -7 6464.95 1268.32   1
  -7  12  -4 13095.7 886.565   1
 -12   7  -4 11790.6 1342.06   2
   7   5  -4 12196.3 1391.78   1
  -7  12  -4 14122.9 1553.56   2
  -7  12  -1 7008.85 1009.47   2
   7   5  -1 7601.02 1033.59   1
 -12   7  -1 7924.40 1036.01   2
  -7  12  -1 7758.86 790.237   1
  -5  -7   2 150616. 3730.35   7
  12  -5   2 153129. 3483.74   1
  -7  12   2 155089. 3574.31   2
   5 -12   2 152776. 3870.29   7
   7   5   2 152722. 3864.96   1
  -5  -7   5 9771.17 1023.29   7
   5 -12   5 10068.8 1170.28   7
   5 -12   8 18729.5 1853.14   7
  -5  -7   8 16505.5 1607.67   7
 -12   8 -11 5633.75 678.573   6
  12  -4 -11 4204.60 648.577   4
  -8  12 -11 6222.09 627.546   6
   8   4 -11 4933.95 681.618   4
  -8  12 -11 4519.45 588.354   4
 -12   8  -8 4275.69 708.141   6
   4 -12  -8 3881.44 660.743   4
  -8  12  -8 3139.11 644.033   6
  -4  -8  -8 4218.91 606.247   6
  12  -4  -8 4826.07 1347.29   1
  12  -4  -8 2877.05 636.337   4
   8   4  -8 3430.51 627.264   4
  -8  12  -8 4112.87 635.706   4
 -12   8  -5 10613.0 1341.71   2
  -8  12  -5 10196.1 1391.41   2
   8   4  -5 8600.58 1370.29   1
   8   4  -2 18482.5 1444.24   1
 -12   8  -2 17871.8 1474.58   2
  -8  12  -2 19640.9 1505.53   2
  -8  12  -2 17130.4 999.794   1
 -12   8   1 2837.80 718.032   2
  12  -4   1 1316.95 464.638   1
  -4  -8   1 2902.55 544.227   7
   4 -12   1 2868.21 550.412   7
   8   4   1 2544.79 685.974   1
  -8  12   1 2563.20 606.788   2
   4 -12   4 84462.5 3019.65   7
  -4  -8   4 82701.5 2853.98   7
   4 -12   7 9405.44 1330.67   7
  -4  -8   7 8214.67 1103.33   7
  12  -3 -12 4419.65 538.054   4
   9   3 -12 4549.78 553.499   4
  -9  12 -12 4755.87 447.887   6
 -12   9 -12 5372.31 496.755   6
  -9  12 -12 3729.32 425.877   4
 -12   9  -9 16206.4 1136.89   6
  -9  12  -9 15952.3 1132.39   6
  12  -3  -9 13736.4 1088.01   4
  -9  12  -9 13535.5 987.971   4
   9   3  -9 15806.4 1119.39   4
  -3  -9  -9 16065.3 909.514   6
   9   3  -6 23185.4 2113.15   1
  12  -3  -6 19741.8 2063.59   1
 -12   9  -6 18365.0 1964.24   2
  -9  12  -6 23737.2 2084.37   2
   9   3  -3 36882.5 2178.88   1
  -9  12  -3 36590.7 2151.76   2
 -12   9  -3 37410.1 2146.93   2
  -3  -9   0 11403.3 849.583   7
 -12   9   0 11821.6 1095.26   2
   9   3   0 11356.2 1066.25   1
  -9  12   0 13272.7 1156.90   2
  12  -3   0 11931.7 1088.31   1
   3 -12   0 11284.6 809.993   7
   9   3   3 24175.7 1108.38   1
   3 -12   3 26279.6 1446.56   7
  -3  -9   3 25278.9 1345.49   7
   3 -12   6 33438.8 2153.78   7
  -3  -9   6 32091.3 2006.75   7
  10   2 -10 5886.76 758.034   4
 -10  12 -10 6034.76 694.437   4
 -10  12 -10 6980.41 806.886   6
 -12  10 -10 6899.73 772.723   6
  12  -2 -10 6341.71 807.050   4
 -10  12  -7 19925.6 998.695   4
   2 -12  -7 17698.7 1083.87   4
 -12  10  -7 19563.6 1983.82   2
  -2 -10  -7 18061.2 1037.36   4
 -10  12  -7 18481.6 1995.86   2
  10   2  -7 18026.1 2016.75   1
 -12  10  -7 19977.8 1122.03   6
  12  -2  -7 20208.1 1120.89   4
 -10  12  -7 19749.1 1100.38   6
  -2 -10  -7 22224.8 1015.18   6
  12  -2  -7 17316.2 2089.98   1
  10   2  -7 20993.9 1110.55   4
  10   2  -4 5325.89 1167.27   1
 -10  12  -4 4605.62 976.227   2
  12  -2  -4 4642.72 1209.91   1
 -12  10  -4 3924.98 954.881   2
  10   2  -1 6280.26 1017.42   1
 -10  12  -1 7338.36 1003.05   2
 -12  10  -1 7470.58 1059.62   2
  12  -2  -1 7007.31 1072.07   1
  -2 -10   2 35719.8 1551.17   7
 -10  12   2 34005.5 1416.31   2
  12  -2   2 35000.0 1353.12   1
 -12  10   2 39427.8 1638.11   2
  10   2   2 36505.3 1522.82   1
   2 -12   2 37813.4 1617.90   7
  -2 -10   5 30297.7 1854.66   7
   2 -12   5 30082.3 1880.05   7
   2 -12   8 13695.7 1586.14   7
  -2 -10   8 15616.3 1626.29   7
  12  -1 -11 623.841 507.141   4
 -11  12 -11 235.501 465.935   6
  11   1 -11 1125.89 510.792   4
 -11  12 -11 1250.58 402.473   4
 -12  11 -11 492.506 474.287   6
  12  -1  -8 31120.2 1434.72   4
  11   1  -8 33508.4 1475.02   4
 -12  11  -8 29213.4 1286.31   4
  12  -1  -8 27670.0 2571.33   1
 -12  11  -8 31944.3 1472.68   6
 -11  12  -8 29714.0 1445.96   6
 -11  12  -8 30024.2 1317.34   4
 -12  11  -5 31119.9 2290.57   2
  12  -1  -5 33942.3 2545.63   1
  11   1  -5 36041.2 2631.42   1
 -11  12  -5 32932.4 2381.30   2
 -12  11  -2 68058.5 2919.90   2
  12  -1  -2 80237.2 3173.17   1
 -11  12  -2 69626.3 2897.83   2
  11   1  -2 76836.6 3088.90   1
   1 -12   1 96664.2 2784.50   7
 -12  11   1 97272.5 3045.69   2
  11   1   1 95029.5 2970.81   1
  -1 -11   1 96149.9 2754.87   7
  12  -1   1 95849.9 2998.44   1
 -11  12   1 103329. 3109.89   2
   1 -12   4 38442.5 1941.28   7
  -1 -11   4 40567.4 1966.40   7
   1 -12   7 1276.33 769.456   7
  -1 -11   7 400.749 636.582   7
 -12  12 -12 6436.46 509.788   6
  12   0 -12 5461.18 536.078   4
 -12  12  -9 223.672 610.056   6
 -12  12  -9 251.402 401.981   4
  12   0  -9-511.296 595.318   4
  12   0  -6 40440.3 2950.05   1
 -12  12  -6 39023.0 2700.06   2
 -12  12  -3 23.1228 793.521   2
  12   0  -3 473.782 940.034   1
 -12  12   0 140425. 4156.01   2
  12   0   0 129528. 3935.49   1
   0 -12   0 133799. 3555.02   7
   0 -12   3-518.562 535.405   7
   0 -12   6 34427.4 2165.30   7
 -13   0 -10 11374.8 854.820   6
   0  13 -10 11662.1 939.358   4
 -13   0  -7 450.825 530.498   6
  13 -13  -7 391.872 526.170   4
   0  13  -7-469.380 499.997   4
   0  13  -7 73.9320 1038.77   2
 -13   0  -4 39783.0 2454.76   2
   0  13  -4 40609.6 2221.58   1
   0  13  -1-274.461 689.046   1
  13 -13   2 61271.3 1999.34   7
   0  13   2 58744.7 2568.78   1
  13 -13   5-353.823 615.280   7
   1  12 -11 4987.12 678.096   4
 -12  -1 -11 4375.58 539.677   6
 -13   1 -11 4847.87 576.266   6
  -1  13 -11 5291.65 692.676   4
  13 -12  -8 59682.8 2075.13   4
  12 -13  -8 57574.1 2053.17   4
 -12  -1  -8 51401.7 1917.01   6
   1  12  -8 54468.9 1979.88   4
 -13   1  -8 53422.3 1934.37   6
  -1  13  -8 56427.0 1986.51   4
 -13   1  -5 25170.5 2042.54   2
 -12  -1  -5 20536.6 1830.48   2
  -1  13  -5 21625.0 2239.91   2
   1  12  -5 23904.8 1829.69   1
  -1  13  -5 22430.4 1677.89   1
  -1  13  -2 45393.5 2176.75   1
   1  12  -2 48544.3 2257.59   1
 -13   1  -2 47319.1 2461.80   2
  13 -12   1 9528.03 588.311   7
   1  12   1 10374.0 1076.28   1
  12 -13   1 9702.21 634.837   7
  -1  13   1 10157.1 1072.91   1
  12 -13   4 92947.5 3277.16   7
 -12  -1   4 92719.6 2637.34   7
  12 -13   7 11227.3 1370.04   7
   2  11 -12 219.047 381.292   4
  -2  13 -12 331.011 351.069   4
 -13   2 -12 611.490 337.327   6
 -11  -2 -12 818.780 302.275   6
  13 -11  -9 7518.93 913.059   4
  -2  13  -9 8615.69 870.917   4
   2  11  -9 7349.01 874.119   4
 -13   2  -9 9476.72 892.078   6
 -11  -2  -9 10542.2 876.449   6
  -2  13  -9 8370.30 854.078   6
   2  11  -6 17745.6 1671.16   1
  -2  13  -6 15385.7 2067.63   2
   2  11  -6 13532.0 2040.50   2
 -13   2  -6 15173.6 1553.00   2
   2  11  -3 18654.2 1488.30   1
 -13   2  -3 19694.5 1693.94   2
  -2  13  -3 21157.6 1457.10   1
  -2  13   0 39726.4 1936.65   1
  11 -13   0 42567.4 1326.22   7
   2  11   0 38808.0 1975.16   1
  11 -13   3 26670.5 1452.38   7
 -11  -2   3 25812.6 1154.62   7
   2  11   3 22291.1 1504.15   1
  11 -13   6 9534.01 1177.79   7
  13 -10 -10 8892.65 875.707   4
 -10  -3 -10 7964.91 735.351   6
  -3  13 -10 8034.37 837.808   4
   3  10 -10 9051.92 874.241   4
  -3  13 -10 9026.32 793.115   6
 -13   3 -10 8676.64 808.668   6
  -3  13  -7 2902.59 1171.72   2
   3  10  -7 2625.43 521.701   4
 -13   3  -7 3107.06 650.095   6
  13 -10  -7 1940.81 597.310   4
   3  10  -7 1952.30 1112.28   2
 -10  -3  -7 3439.86 602.616   6
  10 -13  -7 2495.67 677.238   4
  -3  13  -7 2621.01 552.498   4
 -13   3  -4 12110.9 1436.65   2
   3  10  -4 11222.1 1292.74   1
  -3  13  -4 11412.8 1117.99   1
  -3  13  -4 12412.4 1701.38   2
 -13   3  -1 4964.73 1052.00   2
   3  10  -1 6039.28 986.696   1
  -3  13  -1 4605.48 790.204   1
 -10  -3   2 2383.82 437.918   7
   3  10   2 2325.57 681.132   1
  10 -13   2 2305.51 529.872   7
  10 -13   5 4326.00 864.709   7
 -10  -3   5 3692.80 559.408   7
  10 -13   8 2754.93 887.790   7
  -4  13 -11 429.817 439.446   6
  -4  13 -11 926.284 481.080   4
   4   9 -11 736.747 538.416   4
 -13   4 -11 1743.92 517.192   6
  -9  -4 -11 1495.96 411.984   6
   4   9  -8 22384.7 1243.08   4
  -9  -4  -8 23834.5 1204.79   6
 -13   4  -8 21721.8 1203.88   6
   9 -13  -8 23021.5 1243.94   4
  13  -9  -8 21957.2 1255.34   4
  -4  13  -8 23343.0 1233.14   4
 -13   4  -5 17394.1 1705.07   2
  -4  13  -5 20678.3 2114.89   2
  -4  13  -5 20376.5 1382.32   1
   4   9  -5 18691.7 1713.75   1
  -4  13  -2 21094.0 1342.57   1
   4   9  -2 20082.9 1479.15   1
 -13   4  -2 21070.0 1615.13   2
  -4  13   1 10521.2 1085.18   1
   4   9   1 11140.2 1043.70   1
  -9  -4   1 12082.5 804.190   7
   9 -13   1 13105.0 802.771   7
   9 -13   4 56854.0 2411.90   7
  -9  -4   4 51378.7 1991.32   7
   9 -13   7 31338.5 2216.53   7
  -9  -4   7 28856.9 1806.36   7
 -13   5 -12 6768.09 525.936   6
  -5  13 -12 5138.67 508.983   4
   5   8 -12 5471.40 589.321   4
   5   8  -9 1397.13 596.574   4
  -5  13  -9 952.354 568.213   4
  -5  13  -9 734.663 549.956   6
  13  -8  -9 799.071 598.870   4
 -13   5  -9 978.458 549.150   6
  -8  -5  -9 1353.11 529.212   6
   5   8  -6 16198.2 1731.14   1
 -13   5  -6 16250.6 1630.58   2
  -5  13  -6 17227.0 1998.28   2
  -5  13  -3 19821.3 1248.27   1
   5   8  -3 20656.4 1585.93   1
 -13   5  -3 18791.9 1593.29   2
  -5  13  -3 21802.7 1999.91   2
   5   8   0 73024.3 2665.66   1
  -5  13   0 68641.5 2533.29   1
   8 -13   0 77383.2 2096.57   7
 -13   5   0 77560.2 2951.30   2
  -5  13   0 73406.4 2823.79   2
   5   8   3 52569.6 2059.85   1
   8 -13   3 51839.5 2083.07   7
  -8  -5   3 51495.3 1877.20   7
  -8  -5   6 15828.4 1296.98   7
   8 -13   6 15359.6 1504.34   7
 -13   6 -10-418.346 559.756   6
   6   7 -10 901.695 582.244   4
  -6  13 -10 1247.09 571.753   6
  -6  13 -10 516.311 488.758   4
  13  -7 -10 1003.61 575.224   4
  -7  -6 -10 287.304 425.421   6
 -13   6  -7 1605.93 909.600   2
   6   7  -7 1486.51 940.682   1
 -13   6  -7 2710.74 586.637   6
   7 -13  -7 1634.57 540.086   4
  -7  -6  -7 2135.40 535.764   6
  -6  13  -7 1431.25 449.456   4
   6   7  -7 1448.37 469.800   4
  -6  13  -7 2034.90 1040.73   2
  13  -7  -7 686.195 959.264   1
  13  -7  -7 656.208 471.630   4
  -6  13  -4 7936.38 807.166   1
  -6  13  -4 9963.04 1537.14   2
   6   7  -4 6819.65 1196.90   1
 -13   6  -4 8112.68 1225.04   2
  -6  13  -1 35913.2 1986.45   2
 -13   6  -1 29704.8 1794.47   2
  -6  13  -1 30903.1 1546.80   1
   6   7  -1 30961.2 1767.82   1
   7 -13   2 19492.1 1118.01   7
  -7  -6   2 19403.8 1050.38   7
  -6  13   2 21458.5 1124.34   2
   6   7   2 19355.9 1247.94   1
  -7  -6   5 4930.75 766.267   7
   7 -13   5 5925.80 956.855   7
   7 -13   8 9918.84 1407.77   7
  -7  -6   8 10323.1 1277.86   7
  13  -6 -11 3494.61 599.601   4
 -13   7 -11 3168.37 568.848   6
  -7  13 -11 2507.69 499.173   6
  -7  13 -11 2547.33 517.217   4
   7   6 -11 1984.67 572.365   4
  -6  -7 -11 2664.74 404.168   6
   6 -13  -8 10517.3 936.307   4
  13  -6  -8 9772.55 1647.94   1
   7   6  -8 11615.6 922.939   4
  -7  13  -8 10135.2 897.912   6
 -13   7  -8 10750.3 897.970   6
  -6  -7  -8 10000.7 813.232   6
  13  -6  -8 12561.8 987.712   4
  -7  13  -8 10361.4 840.591   4
  -7  13  -8 10223.4 1782.52   2
   7   6  -5 5722.65 1214.84   1
 -13   7  -5 5824.21 1110.40   2
  -7  13  -5 6497.62 1303.34   2
  -7  13  -2 21536.4 1214.27   1
   7   6  -2 20684.8 1584.66   1
 -13   7  -2 20590.8 1544.87   2
  -7  13  -2 22868.1 1777.15   2
   6 -13   1 33094.2 1377.08   7
  -7  13   1 33679.4 1623.86   2
  -6  -7   1 30398.1 1335.18   7
   7   6   1 30589.5 1612.29   1
 -13   7   1 32706.5 1786.12   2
   6 -13   4 8714.74 989.307   7
  -6  -7   4 7448.23 825.372   7
  -6  -7   7 1685.89 680.045   7
   6 -13   7 1424.78 787.850   7
 -13   8 -12 3271.90 432.074   6
  -8  13 -12 3777.71 416.219   6
  -8  13 -12 2274.20 391.646   4
   8   5 -12 3826.01 523.968   4
  -5  -8  -9 3826.93 578.172   6
 -13   8  -9 3094.68 629.138   6
  -8  13  -9 4455.75 742.452   6
   8   5  -9 4273.77 720.430   4
  13  -5  -9 3690.27 690.463   4
  -8  13  -9 4312.78 687.093   4
  13  -5  -6 16048.2 1970.03   1
   8   5  -6 16632.1 1821.93   1
 -13   8  -6 13618.5 1629.62   2
  -8  13  -6 16525.6 1858.10   2
   8   5  -3 51441.3 2578.87   1
 -13   8  -3 50771.1 2520.24   2
  -8  13  -3 53292.2 2700.33   2
  -8  13  -3 49525.4 1836.18   1
  -8  13   0 76267.0 2765.25   2
 -13   8   0 78368.9 2842.85   2
   8   5   0 72660.7 2685.75   1
   5 -13   0 75557.4 2206.62   7
  -5  -8   0 71073.6 2300.27   7
   8   5   3 20058.7 1129.47   1
  -5  -8   3 21796.6 1234.17   7
   5 -13   3 21284.1 1320.35   7
  -5  -8   6 16174.6 1385.65   7
   5 -13   6 16819.6 1585.74   7
   9   4 -10 6437.81 757.327   4
 -13   9 -10 6738.73 776.767   6
  13  -4 -10 7072.85 815.231   4
  -4  -9 -10 8280.54 630.809   6
  -9  13 -10 9085.27 832.149   6
  -9  13 -10 7639.16 768.273   4
   9   4  -7 33674.3 1425.12   4
  -9  13  -7 30901.6 1286.16   4
  -9  13  -7 30728.1 2548.93   2
  -4  -9  -7 34555.4 1331.74   6
 -13   9  -7 29931.3 2337.04   2
   9   4  -7 30833.2 2523.62   1
  13  -4  -7 30836.3 1385.85   4
  13  -4  -7 26485.4 2491.42   1
 -13   9  -7 30972.3 1381.05   6
  -9  13  -4 55351.1 2929.18   2
   9   4  -4 52456.3 2781.42   1
 -13   9  -4 54704.0 2763.47   2
  -9  13  -1 11140.3 1164.77   2
 -13   9  -1 11921.5 1196.68   2
   9   4  -1 11624.3 1241.72   1
  -4  -9   2 19780.8 1143.60   7
   9   4   2 20618.4 1222.35   1
  13  -4   2 20412.4 1023.06   1
 -13   9   2 21030.6 1334.08   2
   4 -13   2 20825.1 1189.72   7
  -9  13   2 22450.6 1108.56   2
   4 -13   5 19600.3 1549.36   7
  -4  -9   5 18683.4 1414.89   7
   4 -13   8 24148.1 2061.57   7
  -4  -9   8 23595.8 1938.16   7
 -13  10 -11 4409.78 627.165   6
 -10  13 -11 4261.53 609.821   6
 -10  13 -11 3039.29 505.095   4
  10   3 -11 3951.77 606.118   4
  13  -3 -11 3853.61 623.524   4
 -10  13  -8 3797.68 710.798   6
 -10  13  -8 4284.62 1376.08   2
  10   3  -8 3813.88 675.988   4
  13  -3  -8 3636.76 629.442   4
 -13  10  -8 4556.76 727.319   6
  13  -3  -8 1942.19 1130.43   1
 -10  13  -8 4666.80 623.845   4
  -3 -10  -8 4933.44 629.765   6
  10   3  -5 3805.11 1102.87   1
 -13  10  -5 3874.21 989.228   2
 -10  13  -5 4204.89 1127.96   2
  13  -3  -5 4030.11 1230.55   1
  10   3  -2 2718.01 936.059   1
 -13  10  -2 2915.99 899.924   2
 -10  13  -2 2818.26 908.396   2
  -3 -10   1 5313.87 681.733   7
  10   3   1 4838.41 794.523   1
   3 -13   1 5492.13 703.847   7
 -13  10   1 5230.50 824.692   2
  13  -3   1 5443.33 786.922   1
 -10  13   1 5494.46 785.769   2
   3 -13   4 11003.4 1083.65   7
  -3 -10   4 12437.1 1102.37   7
   3 -13   7 1169.95 725.799   7
  -3 -10   7 1971.34 749.742   7
  13  -2 -12 1794.96 424.458   4
 -11  13 -12 1975.33 374.890   6
 -13  11 -12 2766.40 407.676   6
  11   2 -12 1522.96 412.843   4
 -13  11  -9 1874.70 666.735   6
 -11  13  -9 802.359 600.901   6
  11   2  -9 412.798 535.527   4
 -11  13  -9 392.257 451.004   4
  13  -2  -9-108.438 537.992   4
  11   2  -6 9238.06 1591.96   1
 -13  11  -6 8384.96 1417.53   2
  13  -2  -6 12530.3 1858.52   1
 -11  13  -6 10932.0 1585.50   2
 -11  13  -3 24052.8 1820.42   2
  11   2  -3 25392.8 1945.71   1
  13  -2  -3 24440.8 1989.55   1
 -13  11  -3 24855.9 1836.05   2
  11   2   0 42532.1 2073.77   1
  13  -2   0 41787.1 2017.59   1
 -13  11   0 42749.2 2119.59   2
   2 -13   0 42808.4 1678.47   7
  -2 -11   0 41730.3 1700.44   7
 -11  13   0 45226.9 2134.09   2
  -2 -11   3 20472.1 1276.39   7
   2 -13   3 20267.5 1302.29   7
  -2 -11   6 17436.8 1516.72   7
   2 -13   6 17201.9 1570.84   7
 -12  13 -10 1528.43 457.264   4
 -13  12 -10-82.8266 603.379   6
  12   1 -10 2272.38 574.666   4
 -12  13 -10 1861.10 610.773   6
  13  -1 -10 1421.86 590.892   4
 -12  13  -7 11994.1 1770.64   2
  12   1  -7 13018.0 935.272   4
 -13  12  -7 10506.6 1625.89   2
  13  -1  -7 11241.9 861.644   4
 -12  13  -7 11417.8 872.714   6
 -12  13  -7 11710.8 786.423   4
 -13  12  -7 12427.5 933.329   6
  -1 -12  -7 12543.7 836.728   6
  12   1  -7 12827.2 1849.28   1
  13  -1  -7 10860.2 1766.57   1
  12   1  -4 99717.8 4200.83   1
  13  -1  -4 97097.8 4257.08   1
 -12  13  -4 90252.2 3839.70   2
 -13  12  -4 93513.4 3882.73   2
  12   1  -1 10167.9 1211.54   1
  13  -1  -1 11010.3 1238.89   1
 -12  13  -1 10024.2 1168.76   2
 -13  12  -1 9196.63 1186.46   2
  -1 -12   2 46069.5 1892.61   7
 -12  13   2 46112.9 1829.32   2
 -13  12   2 52128.9 1983.85   2
  13  -1   2 46398.2 1779.15   1
  12   1   2 44461.3 1781.22   1
   1 -13   2 46238.1 1896.34   7
  -1 -12   5 22146.5 1622.50   7
   1 -13   5 23762.8 1709.22   7
 -13  13 -11-745.444 517.333   6
  13   0 -11 102.024 454.353   4
 -13  13  -8 35808.0 1443.12   4
  13   0  -8 37165.7 1604.54   4
 -13  13  -8 38821.2 1629.99   6
 -13  13  -5-194.391 892.951   2
  13   0  -5-260.846 878.600   1
 -13  13  -2 62708.0 2837.36   2
  13   0  -2 63470.8 2958.39   1
  13   0   1 164.178 606.076   1
   0 -13   1-190.062 468.026   7
 -13  13   1 336.816 624.186   2
   0 -13   4 42426.2 2086.39   7
   0 -13   7-294.028 709.736   7
 -14   0 -11-321.579 396.924   6
   0  14 -11 200.369 452.596   4
   0  14  -8 11209.4 932.743   4
 -14   0  -8 10845.9 928.684   6
   0  14  -5-195.927 648.245   1
 -14   0  -5-404.419 795.671   2
   0  14  -5 299.017 970.307   2
   0  14  -2 150483. 4599.03   1
   0  14   1-291.057 679.350   1
  14 -14   1 182.739 277.605   7
  14 -14   4 15453.5 1291.88   7
  14 -14   7-14.7927 735.644   7
 -13  -1 -12 23187.9 795.449   6
  -1  14 -12 19394.9 853.861   4
   1  13 -12 20489.9 885.302   4
 -14   1 -12 23748.7 824.806   6
 -14   1  -9 13117.4 959.981   6
  -1  14  -9 11829.9 997.629   4
 -13  -1  -9 13633.7 989.639   6
   1  13  -9 12177.9 1035.47   4
  -1  14  -9 12378.5 955.691   6
  13 -14  -6 4402.46 662.068   4
  14 -13  -6 4777.16 632.453   4
 -14   1  -6 5266.24 1170.66   2
   1  13  -6 5881.12 1096.77   1
 -13  -1  -6 4797.60 626.185   6
   1  13  -6 4603.16 581.782   4
 -14   1  -6 5147.77 644.426   6
  -1  14  -6 4196.34 567.417   4
   1  13  -6 3594.59 1425.01   2
  -1  14  -6 4558.90 1403.79   2
 -14   1  -3 3908.10 1090.78   2
  -1  14  -3 3762.51 848.053   1
   1  13  -3 3494.71 868.951   1
  -1  14   0 29129.1 1772.94   1
   1  13   0 28723.3 1763.84   1
  13 -14   3 4076.25 641.296   7
  14 -13   3 4557.98 692.534   7
 -13  -1   3 4131.34 479.022   7
  13 -14   6 16620.2 1551.53   7
  -2  14 -10 7633.03 727.215   6
  -2  14 -10 7048.00 801.928   4
 -14   2 -10 8612.30 821.980   6
 -12  -2 -10 6434.34 713.188   6
   2  12 -10 7200.31 808.609   4
  12 -14  -7 15746.5 1071.53   4
   2  12  -7 18231.6 1047.89   4
 -14   2  -7 16003.3 1035.57   6
 -12  -2  -7 17964.2 1076.40   6
  14 -12  -7 18433.8 1120.11   4
  -2  14  -7 19253.1 2315.37   2
  -2  14  -7 18200.8 1037.72   4
  -2  14  -4 12052.5 1670.72   2
 -14   2  -4 10866.3 1415.63   2
   2  12  -4 10885.4 1348.32   1
  -2  14  -4 11556.1 1215.54   1
 -14   2  -1 4124.77 1137.73   2
   2  12  -1 3790.81 935.484   1
  -2  14  -1 3938.01 837.582   1
  -2  14   2 49098.2 2275.54   1
 -12  -2   2 48301.8 1630.51   7
  14 -12   2 50652.6 1761.69   7
   2  12   2 46545.8 2258.68   1
  12 -14   2 48084.9 1770.86   7
  12 -14   5 1959.24 717.123   7
 -11  -3 -11 10293.8 692.421   6
  -3  14 -11 9860.40 812.045   4
 -14   3 -11 9700.92 729.019   6
   3  11 -11 10852.2 868.725   4
  14 -11  -8 37458.2 1687.84   4
 -14   3  -8 37185.4 1625.41   6
  -3  14  -8 40149.4 1634.37   4
 -11  -3  -8 39890.7 1610.81   6
   3  11  -8 40424.3 1650.39   4
   3  11  -5 5492.10 1061.39   1
  -3  14  -5 5928.11 1394.33   2
 -14   3  -5 5495.59 1193.48   2
  -3  14  -5 6957.81 937.132   1
 -14   3  -2 16781.9 1596.88   2
   3  11  -2 15850.8 1420.85   1
  -3  14  -2 15588.1 1276.95   1
   3  11   1 5332.63 954.536   1
  11 -14   1 6435.52 587.734   7
  -3  14   1 5485.09 881.456   1
  14 -11   1 5324.07 408.880   7
 -11  -3   4 29076.2 1375.06   7
  11 -14   4 31170.3 1784.27   7
  11 -14   7 13157.0 1480.05   7
 -10  -4 -12 3401.13 343.207   6
 -14   4 -12 2977.94 396.823   6
   4  10 -12 2794.82 455.931   4
  -4  14  -9 970.520 532.867   4
  -4  14  -9 447.381 551.552   6
  14 -10  -9 779.653 632.264   4
 -10  -4  -9-12.5642 509.442   6
 -14   4  -9 687.041 557.287   6
   4  10  -9 1511.72 617.285   4
  10 -14  -6 8257.11 721.029   4
  -4  14  -6 9152.74 698.563   4
   4  10  -6 9133.73 1361.90   1
 -10  -4  -6 8299.97 721.063   6
 -14   4  -6 7623.04 711.720   6
 -14   4  -6 6896.57 1225.98   2
  -4  14  -6 7580.63 1498.40   2
   4  10  -6 6053.66 1677.81   2
  -4  14  -3 20206.7 2053.77   2
   4  10  -3 20376.9 1636.73   1
  -4  14  -3 21355.6 1427.59   1
 -14   4  -3 20400.2 1723.39   2
   4  10   0 16615.6 1302.09   1
  -4  14   0 14866.0 1230.79   1
 -14   4   0 15392.9 1498.40   2
  10 -14   0 16404.2 842.706   7
   4  10   3 41782.4 1994.72   1
  10 -14   3 47702.2 1985.39   7
 -10  -4   3 43706.4 1681.26   7
  10 -14   6 4962.26 907.061   7
 -10  -4   6 5310.05 737.127   7
  -5  14 -10 9138.76 864.632   4
  -5  14 -10 10676.1 861.460   6
 -14   5 -10 11136.1 887.061   6
  -9  -5 -10 9288.72 738.445   6
  14  -9 -10 9575.73 863.007   4
   5   9 -10 11076.8 947.796   4
  14  -9  -7 7576.26 797.102   4
  -9  -5  -7 9363.79 793.999   6
  -5  14  -7 7223.96 706.529   4
   5   9  -7 7767.95 754.686   4
   9 -14  -7 7666.15 815.318   4
 -14   5  -7 6338.35 709.531   6
  -5  14  -7 9781.54 1633.56   2
 -14   5  -4 4783.62 1071.86   2
   5   9  -4 6163.82 1145.34   1
  -5  14  -4 6774.15 1433.63   2
  -5  14  -4 5980.71 827.816   1
  -5  14  -1 17224.4 1243.41   1
  -5  14  -1 19509.8 1661.29   2
 -14   5  -1 16817.2 1525.66   2
   5   9  -1 18247.5 1446.34   1
   5   9   2 96645.7 3120.33   1
  -5  14   2 98642.5 2923.39   2
   9 -14   2 93580.1 2756.58   7
  -9  -5   2 91771.6 2641.36   7
   9 -14   5 4001.43 852.004   7
  -9  -5   5 2915.03 640.103   7
   9 -14   8 63870.2 3345.94   7
   6   8 -11-483.821 508.318   4
  -6  14 -11-1138.01 444.311   6
  -8  -6 -11 199.434 339.947   6
  -6  14 -11 872.963 470.096   4
 -14   6 -11 1126.81 501.758   6
  -8  -6  -8 15431.9 977.518   6
  14  -8  -8 14769.6 1066.33   4
   6   8  -8 15948.2 1061.24   4
  14  -8  -8 12730.3 1972.67   1
  -6  14  -8 13790.8 2065.49   2
  -6  14  -8 16510.2 1025.32   4
 -14   6  -8 13658.0 977.647   6
   6   8  -5 4904.48 1124.80   1
 -14   6  -5 6207.08 1179.08   2
  -6  14  -5 6694.39 1382.02   2
   6   8  -2 4022.33 994.893   1
  -6  14  -2 2751.21 1035.55   2
 -14   6  -2 2576.70 886.408   2
  -6  14  -2 3297.09 653.720   1
 -14   6   1 45473.9 2297.03   2
  -6  14   1 47260.2 2016.04   2
   6   8   1 42538.3 2015.46   1
  -8  -6   1 43766.9 1668.54   7
   8 -14   1 45748.4 1656.62   7
  -8  -6   4 15851.0 1108.68   7
   8 -14   4 16359.0 1309.41   7
   8 -14   7 7978.70 1240.56   7
  -8  -6   7 7248.46 1020.26   7
  -7  14 -12 461.801 293.893   4
   7   7 -12 415.846 375.854   4
 -14   7 -12 99.9177 338.166   6
  -7  14  -9 1293.89 603.236   6
  -7  -7  -9 1805.91 552.997   6
 -14   7  -9 285.259 606.523   6
   7   7  -9 903.740 607.002   4
  14  -7  -9 942.052 568.150   4
  -7  14  -9 1485.84 536.935   4
   7   7  -6 7953.16 1365.73   1
 -14   7  -6 7113.02 1306.97   2
  -7  14  -6 9107.70 1525.95   2
  -7  14  -3 118071. 3475.13   1
 -14   7  -3 117719. 4156.47   2
   7   7  -3 121582. 4182.85   1
 -14   7   0 316.849 723.019   2
   7 -14   0 1110.78 421.148   7
  -7  14   0 808.091 631.590   2
   7   7   0 524.113 637.758   1
  -7  14   0 672.972 668.073   1
  -7  -7   3 123159. 3412.49   7
   7   7   3 125762. 3517.53   1
   7 -14   3 127365. 3669.16   7
   7 -14   6 8392.04 1198.91   7
  -7  -7   6 7010.55 934.510   7
  -8  14 -10 1906.27 564.309   4
   8   6 -10 929.873 570.004   4
  14  -6 -10 1701.01 623.803   4
  -6  -8 -10 2088.04 462.509   6
  -8  14 -10 2649.39 610.512   6
 -14   8 -10 1299.40 559.415   6
 -14   8  -7 9734.70 1475.36   2
   8   6  -7 8684.10 788.546   4
  -6  -8  -7 7500.74 695.566   6
  -8  14  -7 8416.70 727.600   4
  -8  14  -7 8865.38 1598.41   2
   8   6  -7 8030.15 1498.07   1
  14  -6  -7 8992.49 810.833   4
  14  -6  -7 7601.81 1525.47   1
 -14   8  -7 9737.33 821.753   6
   8   6  -4 15318.7 1560.16   1
  -8  14  -4 17030.4 1853.31   2
 -14   8  -4 13275.9 1477.89   2
  -8  14  -4 16589.9 1053.71   1
   8   6  -1 42314.1 2142.95   1
 -14   8  -1 45016.8 2250.90   2
  -8  14  -1 41184.6 1800.34   1
  -8  14  -1 42849.9 2252.77   2
  -6  -8   2 3333.34 581.681   7
   6 -14   2 3890.96 645.907   7
  -8  14   2 3146.40 562.078   2
   8   6   2 3622.04 700.981   1
   6 -14   5 5335.81 922.151   7
  -6  -8   5 5012.37 795.916   7
   6 -14   8 14787.6 1625.12   7
  -6  -8   8 12886.8 1411.95   7
  -9  14 -11 299.168 426.279   6
  14  -5 -11 1834.53 532.683   4
  -9  14 -11 1705.16 447.982   4
   9   5 -11 977.073 540.000   4
 -14   9 -11 2250.56 542.404   6
 -14   9  -8 64141.2 2151.29   6
  14  -5  -8 58772.2 3839.21   1
   9   5  -8 67712.9 2188.38   4
  -9  14  -8 64522.2 2089.82   4
  -5  -9  -8 68172.4 2032.85   6
  -9  14  -8 63607.5 2247.34   6
  -9  14  -8 66386.9 3974.92   2
  -9  14  -5 4911.42 1177.92   2
 -14   9  -5 3386.26 1046.40   2
   9   5  -5 3296.10 1058.85   1
 -14   9  -2 84950.9 3350.79   2
   9   5  -2 93083.6 3456.05   1
  -9  14  -2 91451.8 3520.32   2
  -9  14   1 19348.4 1279.80   2
 -14   9   1 18100.9 1387.21   2
   5 -14   1 19186.6 1112.92   7
  -5  -9   1 17508.2 1086.62   7
  14  -5   1 16419.6 1159.49   1
   9   5   1 15863.2 1305.55   1
  -5  -9   4 6454.49 816.815   7
   5 -14   4 6218.18 891.825   7
   5 -14   7 7457.51 1169.95   7
  -5  -9   7 7671.31 1098.18   7
 -10  14 -12 5439.42 452.375   6
  10   4 -12 5308.91 512.470   4
  10   4  -9 17605.4 1150.67   4
 -14  10  -9 17833.4 1118.86   6
  -4 -10  -9 18054.4 967.069   6
 -10  14  -9 17120.4 1154.69   6
 -10  14  -9 16744.9 1059.90   4
  14  -4  -9 18143.0 1174.81   4
 -14  10  -6 4484.33 1122.64   2
  14  -4  -6 5266.29 1333.79   1
 -14  10  -6 6344.67 660.876   6
  10   4  -6 6752.35 1344.16   1
 -10  14  -6 5541.60 1264.23   2
 -14  10  -3 42052.3 2369.78   2
  10   4  -3 42914.7 2467.82   1
 -10  14  -3 42848.6 2447.78   2
 -14  10   0 17746.5 1430.72   2
   4 -14   0 17109.8 1061.26   7
  -4 -10   0 14503.3 1079.63   7
 -10  14   0 16069.9 1362.76   2
  10   4   0 14764.7 1299.47   1
  14  -4   0 16439.7 1338.61   1
  -4 -10   3 21533.7 1315.80   7
   4 -14   3 22213.9 1382.87   7
   4 -14   6 8505.47 1170.73   7
  -4 -10   6 8218.55 1092.35   7
 -11  14 -10 7364.83 797.300   6
 -14  11 -10 5386.91 723.860   6
  14  -3 -10 4870.88 723.545   4
  11   3 -10 4647.76 716.527   4
 -11  14 -10 5717.51 637.649   4
 -11  14  -7 17328.5 1993.95   2
  14  -3  -7 15631.8 987.028   4
  11   3  -7 15928.0 1019.34   4
 -11  14  -7 16088.8 928.810   4
  -3 -11  -7 16156.5 911.392   6
  11   3  -7 14401.0 1897.21   1
 -14  11  -7 15704.3 1011.64   6
  14  -3  -7 13847.9 1988.10   1
 -14  11  -7 15891.7 1806.51   2
 -11  14  -7 14403.3 1030.83   6
  14  -3  -4 30387.7 2430.77   1
 -11  14  -4 30105.5 2219.31   2
  11   3  -4 29382.3 2232.17   1
 -14  11  -4 29666.7 2114.06   2
  11   3  -1 5134.65 1003.25   1
 -14  11  -1 6746.27 1134.38   2
 -11  14  -1 5699.69 989.887   2
  14  -3  -1 6460.52 1080.15   1
  -3 -11   2 15039.9 1061.54   7
   3 -14   2 14955.5 1103.86   7
  14  -3   2 14992.2 953.710   1
  11   3   2 14087.0 1081.60   1
 -11  14   2 15339.5 1007.47   2
 -14  11   2 17717.2 1318.67   2
  -3 -11   5 5567.07 918.851   7
   3 -14   5 4917.96 926.882   7
  12   2 -11 5983.67 641.797   4
 -12  14 -11 3629.95 472.970   4
  14  -2 -11 4750.09 615.591   4
 -12  14 -11 3588.76 579.866   6
 -14  12 -11 6166.65 647.261   6
  14  -2  -8 29498.3 1401.03   4
  -2 -12  -8 29653.7 1231.72   6
  12   2  -8 29575.5 1394.42   4
 -14  12  -8 27882.8 1391.35   6
 -12  14  -8 27574.7 1410.05   6
 -12  14  -8 27979.0 1272.00   4
 -14  12  -5 1979.05 940.890   2
  14  -2  -5 2397.36 1098.74   1
  12   2  -5 2727.75 1118.70   1
 -12  14  -5 2040.39 1006.85   2
  12   2  -2 50573.7 2590.09   1
 -14  12  -2 48562.1 2520.07   2
 -12  14  -2 47583.9 2438.62   2
  14  -2  -2 50397.3 2696.85   1
 -12  14   1 4208.51 787.301   2
  12   2   1 3788.00 792.679   1
 -14  12   1 3897.27 823.760   2
  14  -2   1 4717.89 888.604   1
  -2 -12   1 4356.18 700.440   7
   2 -14   1 4399.77 688.570   7
  -2 -12   4 10395.9 1040.57   7
   2 -14   4 10099.9 1079.45   7
  -2 -12   7 18077.2 1638.36   7
   2 -14   7 18011.5 1719.19   7
  13   1 -12 681.351 326.256   4
 -14  13 -12 1535.54 346.194   6
 -13  14 -12 832.386 316.072   6
  14  -1  -9 13508.8 995.840   4
  13   1  -9 12961.8 1007.28   4
 -14  13  -9 14326.2 1048.44   6
 -13  14  -9 12092.6 870.226   4
 -13  14  -9 14913.5 1074.37   6
 -13  14  -6 16601.6 1924.92   2
 -14  13  -6 17056.3 1966.09   2
  13   1  -6 17096.3 2020.89   1
  -1 -13  -6 21464.6 959.406   6
 -14  13  -6 19035.8 1046.72   6
  14  -1  -6 16776.4 2045.70   1
  13   1  -3 5510.06 1239.09   1
  14  -1  -3 4698.78 1187.54   1
 -13  14  -3 4503.01 1084.59   2
 -14  13  -3 3779.09 916.674   2
  14  -1   0 28214.2 1753.69   1
   1 -14   0 29667.6 1481.65   7
  -1 -13   0 29219.7 1504.52   7
 -13  14   0 29125.8 1846.50   2
  13   1   0 27918.2 1738.62   1
 -14  13   0 29883.0 1882.15   2
   1 -14   3 4982.15 783.782   7
  -1 -13   3 3572.80 699.096   7
   1 -14   6 6023.31 1061.99   7
  -1 -13   6 4027.37 885.400   7
  14   0 -10 1504.14 598.046   4
 -14  14 -10-393.942 606.596   6
 -14  14  -7 313.677 968.362   2
  14   0  -7-517.792 487.654   4
   0 -14  -7 147.230 384.305   6
 -14  14  -7-863.193 631.959   6
  14   0  -7 293.464 1007.92   1
 -14  14  -4 15164.8 1705.43   2
  14   0  -4 15451.2 1827.54   1
 -14  14  -1 51.1015 836.172   2
  14   0  -1 285.814 739.030   1
  14   0   2 154995. 4143.44   1
   0 -14   2 152410. 4216.75   7
   0 -14   5-60.8108 565.310   7
   0  15 -12 12001.7 622.186   4
 -15   0 -12 14999.5 599.408   6
 -15   0  -9-145.721 551.696   6
   0  15  -9-414.296 543.116   4
   0  15  -9-862.447 568.874   6
 -15   0  -6 7150.27 756.004   6
   0  15  -6 6247.72 679.669   4
   0  15  -6 4905.12 1631.51   2
   0  15  -3 125.474 664.976   1
   0  15   0 172547. 5093.90   1
  15 -15   3-30.0732 400.257   7
  15 -15   6 18969.6 1638.95   7
  -1  15 -10 6403.33 771.674   4
   1  14 -10 6265.75 773.747   4
 -15   1 -10 6026.41 677.031   6
 -14  -1 -10 5499.41 656.799   6
  -1  15 -10 6629.72 648.762   6
   1  14  -7 43557.9 1694.04   4
   1  14  -7 49184.0 3808.50   2
 -15   1  -7 44325.6 1734.72   6
  -1  15  -7 46803.7 1740.71   4
 -14  -1  -7 45349.5 1726.22   6
 -15   1  -4 10456.9 1517.31   2
  -1  15  -4 11047.8 1277.26   1
   1  14  -4 10342.8 1282.29   1
  -1  15  -1 44553.4 2248.98   1
   1  14  -1 45119.9 2306.01   1
   1  14   2 31115.2 1919.35   1
  14 -15   2 29461.6 1321.35   7
  -1  15   2 28910.0 1841.14   1
  15 -14   2 32073.0 1325.61   7
  15 -14   5 2114.60 721.547   7
  14 -15   5 1034.60 590.148   7
   2  13 -11 6369.66 687.836   4
  -2  15 -11 7003.18 704.852   4
 -13  -2 -11 6623.40 581.359   6
 -15   2 -11 7185.70 637.992   6
  15 -13  -8 30947.2 1543.21   4
 -13  -2  -8 31084.7 1439.07   6
   2  13  -8 31140.8 1463.12   4
  -2  15  -8 30119.0 1432.26   4
 -15   2  -8 30635.7 1444.02   6
 -15   2  -5 300.327 789.434   2
   2  13  -5 978.868 674.138   1
  -2  15  -5 574.689 1001.22   2
  -2  15  -5 1806.42 775.829   1
 -15   2  -2 17382.2 1745.96   2
  -2  15  -2 18121.8 1457.18   1
   2  13  -2 18411.3 1512.24   1
  -2  15   1 108564. 3684.11   1
   2  13   1 104402. 3667.73   1
  13 -15   1 108425. 2751.34   7
  13 -15   4 9574.77 1050.30   7
  15 -13   7 18577.3 1779.99   7
  13 -15   7 21155.2 1822.06   7
 -12  -3 -12 891.771 278.915   6
   3  12 -12 352.563 340.046   4
 -15   3 -12 951.547 304.394   6
  -3  15 -12-10.5756 302.527   4
  -3  15  -9 8929.87 889.052   4
 -15   3  -9 9774.28 883.947   6
  -3  15  -9 9597.26 848.186   6
 -12  -3  -9 9584.59 825.666   6
   3  12  -9 10161.0 923.129   4
 -12  -3  -6 20139.4 1080.73   6
 -15   3  -6 16344.5 1861.60   2
  15 -12  -6 19005.4 1069.64   4
  -3  15  -6 18663.0 1000.38   4
   3  12  -6 18675.7 996.590   4
   3  12  -6 19645.2 1909.47   1
 -15   3  -6 17487.7 1021.65   6
  -3  15  -6 18416.6 2282.39   2
  -3  15  -3 17284.8 1377.07   1
 -15   3  -3 14924.5 1623.97   2
   3  12  -3 16671.6 1529.49   1
  -3  15  -3 15425.8 1908.78   2
   3  12   0 2986.44 862.802   1
  -3  15   0 3291.00 839.099   1
  12 -15   0 3379.52 435.527   7
  12 -15   3 35255.0 1695.93   7
 -12  -3   3 35157.2 1445.60   7
   3  12   3 33566.1 1890.44   1
  12 -15   6 3264.94 814.350   7
   4  11 -10 16087.6 1076.23   4
  -4  15 -10 13932.5 1004.16   4
 -11  -4 -10 16188.0 943.388   6
 -15   4 -10 17917.9 1038.67   6
  -4  15 -10 16743.3 980.087   6
  15 -11  -7 6146.08 766.941   4
  -4  15  -7 5857.25 676.857   4
   4  11  -7 6372.04 692.015   4
 -11  -4  -7 6705.08 772.320   6
  -4  15  -7 6053.24 1444.78   2
 -15   4  -7 4676.77 675.183   6
   4  11  -7 5448.21 1561.49   2
 -15   4  -4 18088.3 1766.59   2
   4  11  -4 16965.5 1644.23   1
  -4  15  -4 19785.1 2026.23   2
  -4  15  -4 18089.4 1420.17   1
  -4  15  -1 20282.2 1437.95   1
   4  11  -1 22599.3 1637.18   1
 -15   4  -1 23140.9 1856.01   2
 -11  -4   2 121875. 3182.87   7
   4  11   2 120888. 3778.60   1
  -4  15   2 123499. 3648.37   2
  11 -15   2 117281. 3235.69   7
  11 -15   5 42334.2 2286.06   7
 -11  -4   5 39798.2 1791.50   7
   5  10 -11 15697.4 952.225   4
 -10  -5 -11 15865.7 788.621   6
  -5  15 -11 15943.5 901.578   4
  -5  15 -11 15742.8 818.901   6
 -15   5 -11 15751.0 898.111   6
  15 -10  -8 742.375 592.698   4
 -15   5  -8 214.955 561.361   6
   5  10  -8 251.812 559.027   4
  -5  15  -8 475.338 487.100   4
 -10  -5  -8 92.6317 533.201   6
   5  10  -5 7567.26 1222.53   1
  -5  15  -5 9268.66 1730.06   2
 -15   5  -5 7601.06 1267.20   2
  -5  15  -2 12841.1 1128.49   1
   5  10  -2 11430.1 1269.96   1
 -15   5  -2 12690.7 1365.79   2
  10 -15   1 94749.0 2623.88   7
  -5  15   1 88503.4 3211.61   1
   5  10   1 90864.3 3250.76   1
  -5  15   1 94864.0 3291.11   2
  10 -15   4 25746.1 1617.14   7
 -10  -5   4 24594.6 1332.75   7
  10 -15   7 1890.27 764.995   7
 -15   6 -12 3950.35 419.833   6
   6   9 -12 3836.96 454.394   4
  15  -9  -9 895.354 616.773   4
   6   9  -9 181.996 522.237   4
  -9  -6  -9 52.6230 497.741   6
  -6  15  -9-328.199 608.463   6
 -15   6  -9 803.575 582.836   6
  -6  15  -9-111.752 504.011   4
 -15   6  -6 12459.5 860.176   6
   6   9  -6 13148.5 1595.77   1
  -9  -6  -6 11430.8 815.799   6
 -15   6  -6 10159.7 1510.48   2
  -6  15  -6 12603.2 808.459   4
  -6  15  -6 11757.6 1777.34   2
   6   9  -6 12104.4 799.275   4
  -6  15  -3 7555.62 876.161   1
 -15   6  -3 9060.33 1211.50   2
  -6  15  -3 9602.61 1470.50   2
   6   9  -3 8812.47 1251.00   1
  -6  15   0 87512.3 3261.14   2
  -6  15   0 75550.9 2850.46   1
 -15   6   0 85565.5 3378.83   2
   6   9   0 82371.9 3020.28   1
   9 -15   0 84885.7 2374.85   7
  -9  -6   3 16501.1 1044.79   7
   6   9   3 16214.7 1244.92   1
   9 -15   3 19139.1 1263.62   7
   9 -15   6 4134.28 963.809   7
  -9  -6   6 3549.39 728.668   7
   7   8 -10 3925.03 679.099   4
  -7  15 -10 2814.65 590.315   4
 -15   7 -10 3138.28 637.419   6
  -7  15 -10 4617.73 668.574   6
  -8  -7 -10 3109.59 523.797   6
  15  -8 -10 2633.76 666.617   4
   7   8  -7 7467.83 769.928   4
  -8  -7  -7 7871.24 727.943   6
  -7  15  -7 7512.12 725.038   4
 -15   7  -7 7498.77 1356.17   2
  15  -8  -7 8695.12 836.803   4
 -15   7  -7 8153.50 784.981   6
   7   8  -7 8910.26 1574.04   1
  -7  15  -7 7861.14 1563.49   2
  15  -8  -7 5113.55 1448.32   1
  -7  15  -4 9304.81 1578.08   2
 -15   7  -4 6878.24 1223.68   2
  -7  15  -4 7437.86 861.450   1
   7   8  -4 6953.48 1138.05   1
 -15   7  -1 72404.8 3106.30   2
  -7  15  -1 75946.6 2715.47   1
   7   8  -1 73901.6 3004.26   1
   8 -15   2 60074.6 2130.09   7
  -8  -7   2 58571.6 2037.26   7
   7   8   2 57971.2 2365.56   1
   8 -15   5 13704.8 1316.74   7
  -8  -7   5 11043.4 1076.71   7
  -7  -8 -11 404.657 339.640   6
  -8  15 -11 491.745 405.289   4
 -15   8 -11 922.291 465.741   6
   8   7 -11 435.959 466.174   4
  15  -7  -8 23888.9 1316.28   4
   8   7  -8 26241.9 1324.05   4
 -15   8  -8 22935.5 1244.32   6
  -8  15  -8 24236.6 1334.16   6
  -8  15  -8 28724.0 2761.86   2
  -7  -8  -8 25414.9 1217.70   6
  -8  15  -8 24383.0 1234.39   4
   8   7  -5 11339.6 1550.60   1
  -8  15  -5 12181.4 1732.77   2
 -15   8  -5 11700.8 1535.22   2
  -8  15  -2 65203.9 3067.99   2
  -8  15  -2 54949.5 2187.99   1
 -15   8  -2 58371.3 2760.64   2
   8   7  -2 59196.3 2731.33   1
   7 -15   1 78437.1 2422.88   7
  -8  15   1 81150.6 2842.12   2
   8   7   1 75978.4 2845.27   1
  -7  -8   1 75027.6 2462.46   7
  -7  -8   4 6831.67 861.263   7
   7 -15   4 7404.26 968.253   7
  -7  -8   7 9517.57 1158.45   7
   7 -15   7 7425.68 1164.82   7
 -15   9 -12 9043.37 551.067   6
  -9  15 -12 8237.08 503.227   6
   9   6 -12 7248.45 549.599   4
   9   6  -9 9394.40 892.378   4
 -15   9  -9 8114.08 834.022   6
  -9  15  -9 8384.64 902.773   6
  -9  15  -9 6568.57 736.593   4
  -6  -9  -9 8322.33 736.578   6
  15  -6  -9 8158.00 861.450   4
   9   6  -6 3687.08 1088.98   1
 -15   9  -6 4362.56 1121.40   2
  -6  -9  -6 3860.07 524.265   6
  -9  15  -6 4009.88 513.313   4
 -15   9  -6 3944.72 621.921   6
  -9  15  -6 4372.10 1269.60   2
  15  -6  -6 3789.39 1232.47   1
  -9  15  -3 20037.8 1867.97   2
 -15   9  -3 16436.0 1546.61   2
   9   6  -3 14924.3 1570.23   1
  -9  15  -3 17490.9 1112.35   1
  -9  15   0 81209.9 3086.16   2
 -15   9   0 89325.9 3313.47   2
   9   6   0 80384.8 3058.14   1
   6 -15   0 82986.0 2513.47   7
   9   6   3 7519.10 795.413   1
  -6  -9   3 8168.63 836.201   7
   6 -15   3 9304.37 954.230   7
   6 -15   6 10570.4 1260.23   7
  -6  -9   6 10170.9 1176.66   7
  15  -5 -10 21422.2 1195.10   4
 -10  15 -10 21336.8 1109.23   4
  -5 -10 -10 17636.5 942.556   6
  10   5 -10 19393.8 1163.08   4
 -15  10 -10 20793.0 1157.53   6
 -10  15  -7 2482.24 1118.31   2
 -15  10  -7 1535.70 978.023   2
  15  -5  -7 288.403 480.435   4
  10   5  -7 1054.04 978.249   1
  -5 -10  -7 1615.09 527.523   6
  15  -5  -7-275.267 1087.10   1
 -15  10  -7 2953.98 615.617   6
  10   5  -7 1166.05 523.691   4
 -10  15  -7 1438.03 468.360   4
 -10  15  -4 25701.5 2140.80   2
  10   5  -4 25351.3 2063.44   1
 -15  10  -4 22199.2 1861.61   2
  10   5  -1 100088. 3591.06   1
 -10  15  -1 98772.1 3573.96   2
 -15  10  -1 94477.9 3550.30   2
   5 -15   2 13565.4 1059.32   7
  -5 -10   2 13691.0 1011.82   7
 -15  10   2 12218.4 1263.75   2
  10   5   2 14327.5 1104.96   1
   5 -15   5 10109.4 1189.21   7
  -5 -10   5 9218.13 1043.94   7
  15  -4 -11 7892.15 726.274   4
  11   4 -11 7351.73 693.585   4
 -15  11 -11 7864.35 695.805   6
 -11  15 -11 6199.52 591.873   4
  15  -4  -8 9851.29 919.219   4
  11   4  -8 13521.7 989.838   4
  -4 -11  -8 12090.8 856.496   6
 -15  11  -8 12459.8 958.479   6
 -11  15  -8 12361.9 1022.84   6
 -11  15  -8 12345.6 879.359   4
 -15  11  -5 35840.6 2566.63   2
 -11  15  -5 42622.3 2864.19   2
  11   4  -5 41992.8 2858.45   1
  15  -4  -5 41890.4 3000.00   1
  11   4  -2 114980. 4109.46   1
 -15  11  -2 119208. 4134.74   2
   4 -15   1 22156.0 1252.46   7
  -4 -11   1 21265.9 1260.88   7
  11   4   1 20986.4 1485.71   1
  15  -4   1 21351.9 1407.92   1
 -15  11   1 22494.9 1573.20   2
 -11  15   1 22615.4 1471.86   2
   4 -15   4 19373.0 1444.25   7
  -4 -11   4 18949.7 1353.73   7
   4 -15   7 5076.88 1046.53   7
  -4 -11   7 5831.32 1050.16   7
  12   3 -12 5457.29 478.448   4
 -12  15 -12 6458.56 459.677   6
  12   3  -9 10824.4 941.998   4
 -12  15  -9 10018.0 826.117   4
 -15  12  -9 13518.8 1008.73   6
 -12  15  -9 11832.7 991.650   6
  15  -3  -9 12630.4 977.173   4
  -3 -12  -9 11930.0 772.378   6
 -12  15  -6 4775.00 538.845   4
  15  -3  -6 3283.75 1283.93   1
 -15  12  -6 4823.18 670.787   6
 -15  12  -6 4418.41 1104.83   2
  -3 -12  -6 4232.58 550.002   6
 -12  15  -6 4501.66 1363.05   2
  12   3  -6 2477.49 1107.29   1
 -12  15  -3 33186.8 2243.46   2
  12   3  -3 36390.4 2376.41   1
 -15  12  -3 34012.7 2200.51   2
  15  -3  -3 34680.0 2483.62   1
 -15  12   0 4400.32 946.748   2
 -12  15   0 2171.87 834.197   2
  -3 -12   0 2169.40 573.225   7
   3 -15   0 4148.34 690.517   7
  15  -3   0 2190.64 731.160   1
  12   3   0 2784.74 865.441   1
   3 -15   3 17152.3 1264.70   7
  -3 -12   3 16657.4 1212.18   7
   3 -15   6 18994.2 1667.28   7
  -3 -12   6 18980.3 1628.08   7
 -13  15 -10 1123.97 558.566   6
 -13  15 -10 929.089 411.953   4
  15  -2 -10 1250.37 564.769   4
 -15  13 -10-795.851 626.944   6
  13   2 -10 1003.21 539.213   4
  15  -2  -7 22729.1 1213.00   4
  13   2  -7 23696.9 1233.47   4
  -2 -13  -7 25429.0 1100.77   6
 -15  13  -7 23793.3 2336.07   2
 -13  15  -7 24842.0 1128.10   4
  15  -2  -7 21176.5 2333.28   1
  13   2  -7 21328.9 2342.09   1
 -13  15  -7 16748.8 2211.05   2
 -15  13  -7 22714.0 1227.65   6
 -13  15  -7 21687.4 1210.93   6
 -15  13  -4 10700.7 1430.43   2
  13   2  -4 9103.43 1515.63   1
  15  -2  -4 9818.57 1622.57   1
 -13  15  -4 11321.0 1501.95   2
 -15  13  -1 118159. 4119.16   2
  15  -2  -1 107558. 3935.65   1
  13   2  -1 107531. 3887.25   1
 -13  15  -1 109538. 3975.07   2
   2 -15   2 19410.4 1269.56   7
  -2 -13   2 17900.3 1193.69   7
  13   2   2 18791.2 1285.84   1
 -15  13   2 19725.4 1351.86   2
   2 -15   5 395.640 613.362   7
  -2 -13   5 991.409 582.647   7
 -15  14 -11 6054.11 623.047   6
 -14  15 -11 4904.30 595.337   6
  15  -1 -11 5028.98 570.772   4
  14   1 -11 4293.72 545.070   4
  15  -1  -8 9496.50 860.142   4
  14   1  -8 9426.79 835.413   4
 -14  15  -8 8747.87 742.902   4
 -15  14  -8 10858.1 945.417   6
  -1 -14  -8 9864.52 729.721   6
 -14  15  -8 9644.04 916.477   6
 -14  15  -5 1844.71 907.877   2
 -15  14  -5 3662.25 1182.33   2
  14   1  -5 2576.82 1196.08   1
  15  -1  -5 2002.17 1111.88   1
  15  -1  -2 31989.2 2249.02   1
  14   1  -2 28926.3 2099.01   1
 -15  14  -2 30180.8 2110.53   2
 -14  15  -2 31335.7 2083.18   2
  -1 -14   1 44024.7 1922.65   7
 -15  14   1 44378.2 2210.72   2
  14   1   1 46623.2 2269.19   1
  15  -1   1 48347.8 2257.77   1
 -14  15   1 47885.4 2220.24   2
   1 -15   1 46679.8 1968.42   7
   1 -15   4 11976.1 1170.18   7
  -1 -14   4 12292.4 1174.84   7
  -1 -14   7 45958.1 2658.97   7
   1 -15   7 41631.5 2572.52   7
 -15  15 -12 10204.8 535.450   6
  15   0  -9-604.421 520.350   4
 -15  15  -9 264.071 582.813   6
 -15  15  -6 22770.3 2235.06   2
 -15  15  -6 19643.4 1124.16   6
   0 -15  -6 22380.3 1010.22   6
   0 -15  -6 18914.9 1112.69   5
  15   0  -6 21825.9 2390.79   1
  15   0  -3 873.093 1046.11   1
 -15  15  -3-1382.12 930.342   2
   0 -15   0 178730. 4762.60   7
  15   0   0 170454. 5188.66   1
   0 -15   3-402.848 520.952   7
   0 -15   6 6581.76 1085.27   7
 -15  15   6 5899.46 693.675   3
   0  16 -10 3614.25 602.696   4
 -16   0 -10 2224.57 532.801   6
   0  16  -7-247.754 482.446   4
   0  16  -7-98.0075 1365.89   2
 -16   0  -7 802.306 604.848   6
   0  16  -4 21292.1 1767.43   1
   0  16  -1-265.311 816.220   1
   0  16   2 34838.8 2139.55   1
 -16   0   5 56.2384 509.782   3
  16 -16   5 553.534 651.343   7
 -16   1 -11 2655.65 455.787   6
  -1  16 -11 2612.45 526.658   4
 -15  -1 -11 2408.28 439.943   6
   1  15 -11 2501.10 502.741   4
   1  15  -8 7836.69 838.329   4
  -1  16  -8 7716.01 846.396   4
 -15  -1  -8 7051.04 781.750   6
 -16   1  -8 7647.78 848.473   6
   1  15  -5 2680.34 935.412   1
 -16   1  -5 4874.01 1227.00   2
  -1  16  -5 2309.55 1213.41   2
  -1  16  -5 2996.28 497.043   4
 -15  -1  -5 3663.14 584.445   6
  -1  16  -5 3761.12 1012.00   1
   1  15  -5 1500.09 1313.92   2
 -16   1  -5 3229.16 552.287   6
   1  15  -5 3555.43 511.700   4
   1  15  -2 3329.50 863.291   1
  -1  16  -2 2712.85 781.859   1
   1  15   1 37183.4 2111.94   1
  -1  16   1 38086.2 2193.76   1
  15 -16   4 4938.87 810.066   7
  16 -15   4 4196.55 789.960   7
  15 -16   7 658.919 696.397   7
  16 -15   7 6.23332 674.804   7
   2  14 -12-608.947 311.085   4
  -2  16 -12-109.396 279.672   4
 -16   2 -12-153.731 248.841   6
   2  14  -9 39622.9 1647.04   4
 -14  -2  -9 38521.2 1566.17   6
  -2  16  -9 38036.7 1566.72   6
  -2  16  -9 43270.8 1712.55   4
 -16   2  -9 38918.7 1591.92   6
 -16   2  -6 14851.2 956.532   6
   2  14  -6 14689.5 1687.09   1
  -2  16  -6 16060.8 958.617   4
 -16   2  -6 14675.9 1803.18   2
   2  14  -6 14471.0 929.009   4
   2  14  -6 13042.1 2150.98   2
  -2  16  -6 14616.8 2159.18   2
 -14  -2  -6 16576.4 991.297   6
  -2  16  -3 6374.76 985.978   1
   2  14  -3 6569.47 1118.04   1
 -16   2  -3 9372.75 1439.14   2
  -2  16   0 16704.2 1462.96   1
   2  14   0 16741.6 1460.75   1
   2  14   3 79526.8 3228.85   1
  14 -16   3 83030.3 2789.61   7
  16 -14   3 85410.6 2806.44   7
  16 -14   6 11199.3 1339.64   7
  14 -16   6 12303.8 1351.41   7
  -3  16 -10 2254.59 588.825   4
 -16   3 -10 2335.93 566.386   6
  -3  16 -10 2714.76 542.829   6
   3  13 -10 3318.26 632.975   4
 -13  -3 -10 3418.40 579.869   6
  -3  16  -7 1009.46 1221.64   2
   3  13  -7 1886.50 538.028   4
 -13  -3  -7 2143.56 627.102   6
 -16   3  -7 1363.94 578.722   6
  16 -13  -7 1630.32 626.145   4
   3  13  -7 1449.49 1386.71   2
  -3  16  -7 1284.75 525.007   4
  -3  16  -4 14924.3 1897.10   2
 -16   3  -4 14480.8 1717.66   2
   3  13  -4 15844.2 1594.28   1
  -3  16  -4 15675.6 1427.89   1
  -3  16  -1 20837.5 1550.09   1
 -16   3  -1 17394.7 1829.92   2
   3  13  -1 22222.8 1639.00   1
  13 -16   2 756.809 399.368   7
   3  13   2 459.625 606.403   1
  13 -16   5 6554.50 993.764   7
  -4  16 -11 6031.44 627.899   4
 -12  -4 -11 6501.02 554.599   6
  -4  16 -11 6113.56 525.663   6
 -16   4 -11 5305.76 574.755   6
   4  12 -11 4976.81 614.183   4
  16 -12  -8 457.450 565.003   4
 -12  -4  -8 141.242 570.444   6
 -16   4  -8-305.140 557.718   6
   4  12  -8 413.319 503.916   4
  -4  16  -8 917.150 542.966   4
  -4  16  -5 13118.0 1251.34   1
 -16   4  -5 12765.9 1679.84   2
   4  12  -5 14801.9 1675.46   1
  -4  16  -5 11671.0 1830.83   2
  -4  16  -2 24613.7 1621.49   1
 -16   4  -2 24073.0 1991.00   2
  -4  16  -2 27049.7 2313.50   2
   4  12  -2 26454.8 1876.05   1
  12 -16   1 160050. 3764.06   7
  -4  16   1 148915. 4609.52   1
   4  12   1 161446. 4750.32   1
  12 -16   4 1218.38 544.559   7
 -12  -4   4 959.645 403.490   7
  12 -16   7 5411.93 1057.16   7
   5  11 -12 7789.09 552.827   4
  -5  16 -12 6510.58 504.012   4
  16 -11  -9 7011.03 838.822   4
 -16   5  -9 7180.58 807.516   6
  -5  16  -9 6196.70 767.923   4
 -11  -5  -9 7067.16 738.985   6
   5  11  -9 7023.33 811.111   4
  -5  16  -9 5439.87 749.955   6
  16 -11  -6 844.631 483.861   4
  11 -16  -6-141.275 461.778   5
 -16   5  -6-24.1862 771.747   2
   5  11  -6 637.554 755.421   1
  -5  16  -6 600.250 1070.26   2
 -11  -5  -6 515.838 459.225   6
 -16   5  -6 215.416 474.903   6
   5  11  -6 1078.30 454.927   4
  -5  16  -6 747.604 442.682   4
  -5  16  -3 73731.5 2862.57   1
 -16   5  -3 69643.0 3342.61   2
   5  11  -3 74097.4 3272.87   1
  -5  16   0 1264.75 848.752   2
 -16   5   0 2531.13 1018.32   2
  11 -16   0 1828.10 444.538   7
  -5  16   0 1900.71 757.366   1
   5  11   0 1624.32 820.263   1
   5  11   3 16734.6 1347.98   1
  11 -16   3 18106.6 1210.32   7
 -11  -5   3 15982.2 1052.22   7
  11 -16   6 38646.4 2300.65   7
 -10  -6 -10 6740.74 659.036   6
   6  10 -10 5713.29 760.484   4
 -16   6 -10 6581.78 755.195   6
  -6  16 -10 5475.23 707.798   6
  -6  16 -10 5032.05 684.678   4
  16 -10  -7 1330.78 550.044   4
   6  10  -7 1434.29 530.420   4
 -10  -6  -7 732.117 545.699   6
 -16   6  -7 1203.80 543.545   6
  -6  16  -7 1346.83 502.443   4
  -6  16  -7 1801.97 1126.47   2
   6  10  -7 2173.90 1154.86   2
  -6  16  -4 31122.7 1747.94   1
  -6  16  -4 31767.9 2643.94   2
 -16   6  -4 29520.4 2197.47   2
   6  10  -4 27257.0 2079.39   1
   6  10  -1 13324.0 1345.05   1
  -6  16  -1 11753.2 1127.24   1
  -6  16  -1 14135.4 1515.88   2
 -16   6  -1 13378.8 1483.13   2
   6  10   2 77657.5 2898.11   1
  10 -16   2 76556.6 2465.85   7
 -10  -6   2 76887.2 2469.84   7
  10 -16   5 10848.2 1220.44   7
 -10  -6   5 10938.5 993.925   7
   7   9 -11 3216.35 534.752   4
  -9  -7 -11 3625.62 459.927   6
  -7  16 -11 4774.19 554.878   4
 -16   7 -11 5486.81 617.474   6
  -7  16 -11 3502.61 484.886   6
  -9  -7  -8 874.405 539.699   6
  16  -9  -8 757.386 541.320   4
 -16   7  -8-175.355 590.594   6
  -7  16  -8 542.805 481.976   4
   7   9  -8 322.050 523.514   4
 -16   7  -5 10193.4 1498.99   2
   7   9  -5 11191.3 1510.94   1
  -7  16  -5 10773.9 1634.49   2
  -7  16  -2 36025.4 1853.15   1
 -16   7  -2 36952.0 2277.13   2
   7   9  -2 39398.5 2247.73   1
  -7  16  -2 42087.9 2620.86   2
  -9  -7   1 5296.32 717.236   7
 -16   7   1 5199.59 1095.53   2
   9 -16   1 4447.32 589.580   7
   7   9   1 4513.01 850.621   1
  -7  16   1 5716.57 928.283   2
   9 -16   4 63584.8 2604.45   7
  -9  -7   4 56191.0 2239.20   7
   9 -16   7 44610.8 2604.52   7
  -9  -7   7 39864.5 2214.11   7
  -8  16 -12 2673.16 368.784   4
   8   8 -12 3627.97 427.536   4
  16  -8  -9 5854.04 745.128   4
  -8  -8  -9 5643.29 654.610   6
  -8  16  -9 5779.13 790.000   6
 -16   8  -9 4208.54 686.161   6
  -8  16  -9 4657.79 679.030   4
   8   8  -9 5015.41 739.320   4
 -16   8  -6 10373.9 819.666   6
  16  -8  -6 9946.47 792.609   4
   8   8  -6 10177.5 787.876   4
 -16   8  -6 8811.42 1475.98   2
   8   8  -6 10384.6 1569.15   1
   8 -16  -6 9233.89 820.501   5
  -8  16  -6 10569.3 742.569   4
  -8  -8  -6 10146.5 776.565   6
  -8  16  -6 9361.52 1689.21   2
 -16   8  -3 8379.58 1233.43   2
   8   8  -3 7741.37 1243.28   1
  -8  16  -3 9117.20 952.645   1
  -8  16  -3 8995.96 1427.99   2
  -8  16   0 213.636 730.486   2
   8 -16   0 36.3606 386.764   7
   8   8   0 690.445 735.833   1
 -16   8   0 488.583 739.977   2
  -8  -8   3 8219.40 838.668   7
   8   8   3 8543.50 933.853   1
   8 -16   3 8662.98 915.161   7
  -8  -8   6 9454.10 1130.04   7
   8 -16   6 10338.2 1264.29   7
  16  -7 -10 2689.18 621.901   4
   9   7 -10 1512.78 540.745   4
  -7  -9 -10 2690.47 473.421   6
  -9  16 -10 1254.28 497.809   4
 -16   9 -10 2625.76 610.839   6
  -9  16 -10 1246.28 534.999   6
 -16   9  -7 44259.9 1720.04   6
   9   7  -7 45371.6 1733.01   4
  -9  16  -7 46849.6 3354.79   2
  -9  16  -7 45570.2 1635.80   4
  -7  -9  -7 46158.6 1658.62   6
   9   7  -7 44835.0 3063.60   1
 -16   9  -7 37301.8 2892.91   2
  16  -7  -7 40521.1 3219.16   1
  16  -7  -7 45013.1 1750.41   4
 -16   9  -4 57305.9 3004.28   2
  -9  16  -4 62165.4 3441.77   2
   9   7  -4 58759.1 3083.11   1
  -9  16  -1 5235.77 1044.57   2
 -16   9  -1 5526.01 1039.45   2
   9   7  -1 4881.23 1032.19   1
  -7  -9   2 37788.4 1670.49   7
   9   7   2 37955.3 1875.67   1
   7 -16   2 38301.8 1740.17   7
   7 -16   5 12387.0 1291.53   7
  -7  -9   5 12173.6 1146.68   7
 -16  10 -11 1460.88 475.676   6
 -10  16 -11 292.691 412.319   6
 -10  16 -11 1311.29 415.454   4
  10   6 -11 649.406 422.550   4
  16  -6  -8 852.753 554.230   4
 -10  16  -8 736.672 488.875   4
 -16  10  -8 1088.16 543.076   6
  -6 -10  -8 1296.33 499.439   6
  10   6  -8 241.766 510.015   4
 -10  16  -8 541.107 608.470   6
  10   6  -5 10373.9 1546.25   1
 -16  10  -5 10421.7 1503.13   2
 -10  16  -5 11654.3 1697.84   2
  10   6  -2 76949.0 3301.79   1
 -16  10  -2 78457.2 3304.17   2
 -10  16  -2 74014.7 3348.84   2
  10   6   1 12840.9 1238.21   1
 -16  10   1 14926.5 1413.34   2
  -6 -10   1 12088.9 999.567   7
   6 -16   1 13215.9 982.698   7
 -10  16   1 12624.0 1146.36   2
  16  -6   1 11611.6 1053.50   1
   6 -16   4 30808.1 1786.02   7
  -6 -10   4 30647.2 1702.60   7
  -6 -10   7 2933.85 860.529   7
   6 -16   7 2006.67 838.815   7
  11   5 -12 1729.21 344.718   4
 -16  11 -12 1027.66 318.288   6
 -11  16 -12 1109.59 300.236   6
  11   5  -9 2404.65 624.227   4
  16  -5  -9 1842.28 573.600   4
 -16  11  -9 309.748 566.520   6
 -11  16  -9 1916.91 653.167   6
 -11  16  -9 1597.79 521.083   4
  -5 -11  -9 2466.28 541.832   6
 -11  16  -6 35500.3 2858.48   2
 -11  16  -6 39673.3 1425.22   4
 -16  11  -6 37297.0 2747.08   2
 -16  11  -6 38622.3 1520.73   6
  11   5  -6 42567.4 1566.30   4
  11   5  -6 39251.3 2920.17   1
  16  -5  -6 34380.8 2919.20   1
  -5 -11  -6 39303.0 1419.78   6
   5 -16  -6 37770.1 1540.26   5
 -11  16  -3 16103.3 1670.63   2
  11   5  -3 16635.1 1707.33   1
 -16  11  -3 15845.6 1574.76   2
   5 -16   0 1614.47 542.146   7
 -16  11   0 1499.15 789.919   2
  11   5   0 1526.98 809.774   1
  16  -5   0 2133.16 841.660   1
 -11  16   0 2712.81 791.103   2
  -5 -11   3 72651.6 2609.52   7
   5 -16   3 74930.7 2727.15   7
 -16  11   6 415.270 502.227   3
   5 -16   6 736.065 622.459   7
  -5 -11   6 357.966 580.107   7
 -16  12 -10 5329.56 713.357   6
  -4 -12 -10 4474.36 510.148   6
  16  -4 -10 6090.08 699.631   4
  12   4 -10 4350.82 636.348   4
 -12  16 -10 5884.33 754.508   6
 -12  16 -10 4782.88 606.498   4
 -12  16  -7 4003.23 1261.10   2
  16  -4  -7 4574.42 656.757   4
 -16  12  -7 7278.17 1561.71   2
  -4 -12  -7 6412.21 679.352   6
 -16  12  -7 5096.87 721.664   6
  12   4  -7 5795.58 698.819   4
 -12  16  -7 6428.23 660.050   4
  16  -4  -7 6115.76 1499.80   1
  12   4  -7 6744.20 1598.50   1
 -16  12  -4 1065.54 772.790   2
  16  -4  -4 2520.38 1179.16   1
  12   4  -4 1737.22 1048.31   1
 -12  16  -4 958.709 906.335   2
  12   4  -1 160480. 4951.80   1
 -16  12  -1 157641. 5021.21   2
  16  -4  -1 158940. 5037.82   1
 -12  16  -1 145867. 4802.20   2
   4 -16   2 28169.5 1510.35   7
  12   4   2 27749.4 1560.14   1
 -16  12   2 29820.9 1783.24   2
  -4 -12   2 26467.2 1475.34   7
   4 -16   5 13355.0 1349.62   7
  -4 -12   5 13405.1 1277.17   7
  13   3 -11 5440.57 575.677   4
 -13  16 -11 5465.19 607.062   6
 -16  13 -11 7041.78 646.841   6
  16  -3 -11 5616.83 614.307   4
  16  -3  -8 13913.9 1022.70   4
  -3 -13  -8 12647.0 855.674   6
 -13  16  -8 13669.2 1031.31   6
 -16  13  -8 12960.5 1011.51   6
  13   3  -8 13592.9 974.319   4
 -13  16  -8 10664.6 827.442   4
 -16  13  -5 4466.06 1177.56   2
  16  -3  -5 4760.41 1465.14   1
  13   3  -5 3974.47 1295.85   1
 -13  16  -5 4271.85 1231.50   2
 -16  13  -2-100.184 779.132   2
  16  -3  -2 199.771 869.951   1
  13   3  -2 435.390 801.944   1
 -13  16  -2-48.7914 740.545   2
  16  -3   1 22476.9 1536.85   1
 -13  16   1 22391.3 1554.24   2
 -16  13   1 21053.3 1582.61   2
  -3 -13   1 21138.1 1341.42   7
  13   3   1 22491.5 1580.07   1
   3 -16   1 22135.4 1344.10   7
  -3 -13   4 15572.1 1283.50   7
   3 -16   4 16019.0 1346.61   7
   3 -16   7 485.840 663.492   7
  -3 -13   7 2903.39 881.899   7
 -16  14 -12 1176.80 316.478   6
 -14  16 -12 988.276 289.771   6
  16  -2  -9 12946.2 938.334   4
  14   2  -9 11325.2 920.685   4
 -14  16  -9 10278.0 823.023   4
 -14  16  -9 13036.2 1129.79   6
 -16  14  -9 14062.9 1021.56   6
 -14  16  -6 11034.9 1736.61   2
 -16  14  -6 11503.5 1696.36   2
 -14  16  -6 12323.1 764.803   4
  -2 -14  -6 12216.4 786.197   6
 -16  14  -6 11580.5 882.449   6
  16  -2  -6 12480.0 1970.23   1
  14   2  -6 12055.0 1880.35   1
  -2 -14  -6 11474.7 887.721   5
   2 -16  -6 11110.0 899.784   5
  16  -2  -3 83595.8 4022.31   1
 -14  16  -3 78467.1 3602.53   2
 -16  14  -3 76940.4 3585.56   2
  14   2  -3 82475.0 3851.17   1
 -16  14   0 16680.6 1543.61   2
  14   2   0 18698.1 1577.59   1
   2 -16   0 17650.8 1256.49   7
 -14  16   0 17684.8 1564.38   2
  16  -2   0 17914.2 1518.13   1
  -2 -14   0 16660.2 1252.99   7
  -2 -14   3 7147.82 864.475   7
   2 -16   3 8776.94 988.864   7
   2 -16   6 14494.7 1526.11   7
 -16  14   6 17641.9 1088.19   3
  -2 -14   6 14889.0 1497.44   7
 -14  16   6 14871.8 1025.92   3
 -15  16 -10-625.040 525.425   6
  16  -1 -10 842.064 483.627   4
 -16  15 -10-1063.91 585.196   6
  15   1 -10-11.0600 430.983   4
 -15  16  -7 217.167 406.692   4
 -16  15  -7-62.9375 1055.42   2
  16  -1  -7-331.513 1300.64   1
 -16  15  -7 574.464 559.880   6
 -15  16  -7 114.031 572.654   6
 -15  16  -7-591.416 1104.70   2
  -1 -15  -7-13.9350 401.561   6
  15   1  -7 984.635 1109.13   1
 -15  16  -4 4200.97 1054.16   2
 -16  15  -4 3371.67 1094.50   2
  16  -1  -4 4719.86 1363.22   1
  15   1  -4 4002.13 1228.00   1
 -15  16  -1 36943.0 2302.03   2
 -16  15  -1 39817.4 2426.46   2
  16  -1  -1 36522.9 2253.85   1
  15   1  -1 35523.3 2242.89   1
   1 -16   2 3617.03 707.478   7
  -1 -15   2 4074.36 755.762   7
  -1 -15   5 3254.44 817.451   7
   1 -16   5 4227.23 874.476   7
 -16  16 -11-626.775 428.551   6
  16   0 -11 488.427 352.099   4
  16   0  -8 15548.1 965.900   4
 -16  16  -8 16527.6 1099.59   6
 -16  16  -5 248.634 847.716   2
  16   0  -5 1616.35 1181.97   1
   0 -16  -5 118.847 352.841   6
   0 -16  -5 191.087 445.286   5
  16   0  -2 32341.9 2311.45   1
 -16  16  -2 31535.3 2241.08   2
 -16  16   1-123.106 580.111   2
  16   0   1 163.693 624.247   1
   0 -16   1-169.642 524.408   7
   0 -16   4 23336.0 1651.93   7
   0 -16   7 116.763 678.903   7
   0  17 -11 286.628 370.456   4
 -17   0 -11 144.707 346.487   6
   0  17  -8 15328.7 1073.06   4
 -17   0  -8 15697.8 1052.36   6
   0  17  -5 518.296 812.238   1
   0  17  -5 82.6801 422.855   4
   0  17  -5 958.614 1173.22   2
 -17   0  -5 953.348 499.514   6
   0  17  -2 3313.48 891.747   1
   0  17   1-489.258 730.077   1
   1  16  -9 18716.5 1119.98   4
  -1  17  -9 18253.3 1094.72   4
 -16  -1  -9 16463.5 1033.39   6
 -17   1  -9 17774.5 1056.94   6
  -1  17  -9 15879.6 1016.67   6
   1  16  -9 17387.1 1031.79   6
  -1  17  -6 8065.49 744.164   4
 -17   1  -6 7470.87 776.421   6
   1  16  -6 5678.30 1806.94   2
  -1  17  -6 6217.06 1665.17   2
   1  16  -6 8235.72 738.942   4
 -16  -1  -6 8962.94 828.004   6
   1  16  -3 11212.9 1320.40   1
  -1  17  -3 10168.3 1282.74   1
  -1  17   0 6118.87 1017.24   1
   1  16   0 6906.86 1128.96   1
 -17   1   6 3235.56 679.420   3
  17 -16   6 1566.49 713.173   7
  16 -17   6 3273.01 837.006   7
 -16  -1   6 3879.76 692.906   3
   2  15 -10 16607.3 1008.20   4
  -2  17 -10 15840.2 1023.33   4
 -17   2 -10 17677.0 977.954   6
  -2  17 -10 18122.7 931.028   6
 -15  -2 -10 17597.1 956.986   6
  -2  17  -7 25447.5 1279.83   4
   2  15  -7 21805.3 2939.79   2
  15 -17  -7 26879.5 1303.17   5
  -2  17  -7 26952.4 3039.85   2
 -15  -2  -7 24410.1 1279.28   6
 -17   2  -7 24016.3 1274.99   6
   2  15  -7 25777.7 1257.47   4
  -2  17  -4 5539.81 1031.28   1
 -17   2  -4 5211.23 1255.37   2
  -2  17  -4 3854.83 1341.37   2
   2  15  -4 6080.35 1105.66   1
   2  15  -1 3882.28 925.668   1
  -2  17  -1 4674.44 954.380   1
  -2  17   2 66844.7 2997.85   1
   2  15   2 62913.2 2978.76   1
  17 -15   5 16391.4 1493.25   7
  15 -17   5 16628.8 1461.51   7
 -15  -2   5 17356.8 1123.94   3
 -17   2   5 17170.0 1092.83   3
 -17   3 -11 1018.06 411.667   6
 -14  -3 -11 950.850 388.326   6
   3  14 -11 596.698 395.306   4
  -3  17 -11 951.509 414.158   4
 -14  -3  -8 10720.7 898.175   6
   3  14  -8 9960.94 896.959   4
  -3  17  -8 12153.9 951.887   4
 -17   3  -8 11253.7 948.678   6
  -3  17  -5 4468.60 1536.08   2
 -17   3  -5 3411.86 1133.39   2
 -14  -3  -5 4414.06 614.527   6
 -17   3  -5 4266.60 580.538   6
  -3  17  -5 5108.91 964.557   1
   3  14  -5 4461.01 552.913   4
  -3  17  -5 4092.01 533.457   4
   3  14  -5 4511.74 1034.32   1
  -3  17  -2 15896.3 1422.38   1
   3  14  -2 14991.9 1488.34   1
   3  14   1 4945.97 988.487   1
  -3  17   1 4740.66 964.820   1
  14 -17   4 18250.1 1358.70   7
  17 -14   4 16339.3 1347.94   7
  17 -14   7 13690.5 1565.32   7
  14 -17   7 12736.7 1466.09   7
 -17   4 -12 2181.08 312.355   6
   4  13 -12 1757.95 333.314   4
  -4  17 -12 1707.34 307.884   4
 -13  -4  -9 3259.05 630.376   6
  -4  17  -9 3653.82 675.961   4
  -4  17  -9 3637.78 654.437   6
 -17   4  -9 4081.50 673.265   6
   4  13  -9 3466.55 652.620   4
  13 -17  -6 1136.25 500.701   5
 -17   4  -6 2578.05 608.414   6
  -4  17  -6 1433.80 465.186   4
 -17   4  -6 1899.94 1021.75   2
   4  13  -6 1694.38 448.007   4
 -13  -4  -6 686.780 479.405   6
   4  13  -6 2623.74 1052.49   1
  -4  17  -6 1211.01 1144.72   2
   4  13  -6 1966.96 1323.59   2
  -4  17  -3 20006.8 1577.68   1
  -4  17  -3 23395.8 2268.07   2
   4  13  -3 20717.5 1757.02   1
 -17   4  -3 19814.9 1898.34   2
  -4  17   0 26237.8 1769.55   1
   4  13   0 21519.0 1657.50   1
  13 -17   3 10917.2 975.706   7
 -13  -4   3 10442.0 855.571   7
   4  13   3 9681.05 1134.91   1
  13 -17   6 16416.8 1532.31   7
 -17   4   6 20888.2 1199.58   3
   5  12 -10 9054.44 812.775   4
 -17   5 -10 11176.1 864.984   6
  -5  17 -10 9612.44 802.281   6
 -12  -5 -10 9865.66 753.389   6
  -5  17 -10 9146.36 820.781   4
  17 -12  -7 4841.15 744.351   4
 -12  -5  -7 3587.11 668.035   6
   5  12  -7 4417.00 643.863   4
  -5  17  -7 4344.19 641.419   4
 -17   5  -7 4469.02 687.530   6
   5  12  -7 3832.78 1622.34   2
  -5  17  -7 5001.37 1604.81   2
   5  12  -4 7829.85 1295.60   1
  -5  17  -4 9572.70 1076.52   1
 -17   5  -4 6296.45 1231.84   2
 -17   5  -1 739.143 1079.31   2
  -5  17  -1 13.5679 872.997   2
  -5  17  -1 513.317 623.277   1
   5  12  -1 855.829 810.317   1
 -12  -5   2 3956.78 588.549   7
   5  12   2 5054.38 882.262   1
  12 -17   2 5241.70 647.026   7
  12 -17   5 14960.2 1362.40   7
   6  11 -11 6821.79 634.134   4
  -6  17 -11 7324.28 632.226   4
  -6  17 -11 7431.93 585.613   6
 -11  -6 -11 7020.85 547.401   6
 -17   6 -11 8442.10 656.157   6
  17 -11  -8 9402.46 917.742   4
   6  11  -8 9750.27 919.944   4
 -17   6  -8 8542.61 882.169   6
  -6  17  -8 10467.5 882.501   4
 -11  -6  -8 9505.94 857.106   6
   6  11  -5 23772.1 2075.56   1
 -17   6  -5 23011.6 2141.71   2
  -6  17  -5 27604.5 2542.18   2
 -17   6  -2 3270.35 1012.87   2
  -6  17  -2 4084.39 1219.57   2
   6  11  -2 4736.40 1146.07   1
  -6  17  -2 3644.16 783.923   1
  11 -17   1 11757.5 856.621   7
  -6  17   1 14436.1 1298.72   2
   6  11   1 11153.4 1220.80   1
  11 -17   4 604.441 523.909   7
 -11  -6   4 844.808 433.203   7
  11 -17   7 10590.2 1334.54   7
   7  10 -12 1317.90 310.798   4
  -7  17 -12 296.298 257.297   4
 -17   7 -12 1193.12 300.908   6
  17 -10  -9 7185.67 830.771   4
 -10  -7  -9 8813.67 786.711   6
  -7  17  -9 7349.89 781.861   4
  -7  17  -9 7726.19 821.482   6
   7  10  -9 7137.29 792.453   4
 -17   7  -9 8969.85 859.831   6
   7  10  -6 18511.9 985.512   4
  -7  17  -6 16800.0 962.291   4
   7  10  -6 17651.0 1982.39   1
 -17   7  -6 16572.7 1872.35   2
 -10  -7  -6 16233.1 985.018   6
  10 -17  -6 15548.4 986.087   5
  -7  17  -6 16611.6 2132.48   2
  17 -10  -6 17652.7 1026.76   4
 -17   7  -6 16258.5 987.393   6
  -7  17  -3 54204.8 2383.51   1
 -17   7  -3 48088.8 2827.78   2
   7  10  -3 50178.9 2741.59   1
  10 -17   0 47352.9 1759.25   7
  -7  17   0 42420.3 2165.33   1
 -17   7   0 43148.1 2590.26   2
   7  10   0 44080.4 2333.58   1
  10 -17   3 4113.34 695.695   7
   7  10   3 3717.44 737.022   1
 -10  -7   3 3862.20 639.318   7
  10 -17   6 1514.65 736.372   7
 -17   7   6 1468.41 588.153   3
 -10  -7   6 1260.93 553.537   7
 -17   8 -10 5195.31 690.887   6
  -9  -8 -10 4070.44 538.044   6
  -8  17 -10 4411.60 667.557   6
  -8  17 -10 3129.84 582.562   4
   8   9 -10 4358.27 622.092   4
  -8  17  -7 6862.84 706.759   4
   8   9  -7 8183.09 1559.65   1
  17  -9  -7 6096.71 745.785   4
 -17   8  -7 4716.43 1235.70   2
  17  -9  -7 5113.55 1441.08   1
 -17   8  -7 5972.28 731.752   6
  -9  -8  -7 5197.21 685.884   6
   8   9  -7 6424.99 717.778   4
  -8  17  -7 5314.65 1516.78   2
 -17   8  -4 2836.53 1010.11   2
   8   9  -4 2659.90 968.982   1
  -8  17  -4 2670.43 1151.35   2
  -8  17  -4 3186.78 654.040   1
   8   9  -1 44352.4 2403.24   1
  -8  17  -1 42717.7 2086.03   1
 -17   8  -1 43937.1 2565.93   2
  -8  17  -1 50687.9 2709.06   2
   9 -17   2 21935.7 1282.60   7
  -9  -8   2 21360.2 1266.93   7
   8   9   2 21137.3 1515.07   1
   9 -17   5 12966.6 1316.59   7
  -9  -8   5 12023.2 1112.15   7
  -8  -9 -11 1159.53 330.764   6
 -17   9 -11 1439.74 475.280   6
  -9  17 -11 945.432 412.587   4
   9   8 -11 637.865 391.483   4
  -8  -9  -8 3916.61 647.034   6
  17  -8  -8 3248.12 657.053   4
  -9  17  -8 3522.08 608.853   4
 -17   9  -8 2311.24 602.563   6
   9   8  -8 3080.98 603.349   4
 -17   9  -5 9616.58 1570.19   2
   9   8  -5 11184.6 1622.13   1
  -9  17  -5 11934.7 1816.62   2
  -9  17  -2 21585.6 1915.67   2
   9   8  -2 20738.9 1754.76   1
  -9  17  -2 20631.6 1394.51   1
 -17   9  -2 23184.1 1918.85   2
  -8  -9   1 43283.2 1890.58   7
  -9  17   1 47392.6 2232.54   2
 -17   9   1 45135.7 2573.55   2
   8 -17   1 43707.1 1781.23   7
   9   8   1 43412.5 2249.59   1
   8 -17   4 3862.47 798.484   7
  -8  -9   4 2882.37 622.133   7
   8 -17   7 7022.02 1172.83   7
  -8  -9   7 6016.17 964.469   7
  10   7 -12 1378.27 300.891   4
 -17  10 -12 1243.74 315.171   6
  10   7  -9 8235.27 858.096   4
 -10  17  -9 6521.09 737.424   4
 -17  10  -9 6172.78 763.657   6
 -10  17  -9 6446.79 795.314   6
  -7 -10  -9 6859.27 684.864   6
  17  -7  -9 8502.41 848.506   4
   7 -17  -6 1919.46 583.867   5
 -17  10  -6 1382.74 513.704   6
  10   7  -6 1620.77 984.160   1
  10   7  -6 1507.50 519.784   4
  17  -7  -6 1712.20 1094.70   1
  -7 -10  -6 1414.31 484.843   6
 -10  17  -6 1280.85 436.258   4
 -17  10  -6 1249.20 939.368   2
 -10  17  -6 3017.71 1170.14   2
 -17  10  -3 4657.69 1123.32   2
  10   7  -3 3556.67 1040.33   1
 -10  17  -3 6204.34 1292.97   2
  10   7   0 46590.2 2370.44   1
   7 -17   0 44488.9 1831.40   7
 -17  10   0 47067.5 2534.32   2
 -10  17   0 45084.4 2330.89   2
  -7 -10   3 49094.4 2045.57   7
  10   7   3 49402.2 2046.76   1
   7 -17   3 48654.7 2149.08   7
  -7 -10   6 16421.6 1433.51   7
   7 -17   6 16992.6 1572.41   7
 -17  10   6 18634.1 1152.64   3
  17  -6 -10 9707.32 835.859   4
  11   6 -10 8795.89 790.217   4
 -11  17 -10 9242.18 743.673   4
 -17  11 -10 8565.30 795.149   6
 -11  17 -10 9190.31 845.034   6
  -6 -11 -10 8578.46 646.402   6
 -11  17  -7 7889.13 1711.44   2
  17  -6  -7 11647.1 900.879   4
  11   6  -7 11928.7 887.638   4
 -17  11  -7 11833.7 919.255   6
 -11  17  -7 11333.2 821.155   4
 -17  11  -7 12963.7 1771.90   2
  11   6  -7 11813.2 1789.17   1
  -6 -11  -7 11496.7 853.287   6
  17  -6  -7 9039.44 1781.45   1
  11   6  -4 1379.01 969.847   1
 -17  11  -4 1684.13 933.246   2
 -11  17  -4 1459.82 965.144   2
 -11  17  -1 13040.9 1373.00   2
 -17  11  -1 13813.8 1527.00   2
  11   6  -1 11696.7 1383.73   1
  11   6   2 4046.59 762.331   1
 -17  11   2 3402.33 889.236   2
   6 -17   2 3799.85 642.980   7
  -6 -11   2 3280.38 617.949   7
  -6 -11   5 22346.8 1585.16   7
   6 -17   5 26223.1 1806.08   7
  12   5 -11 165.981 377.187   4
 -12  17 -11 416.322 338.081   4
 -17  12 -11 325.026 426.558   6
 -12  17 -11-119.982 443.897   6
  17  -5  -8 9094.67 810.639   4
  12   5  -8 8873.75 849.807   4
 -12  17  -8 7580.33 741.115   4
  -5 -12  -8 8453.78 751.915   6
 -17  12  -8 10087.9 897.681   6
 -12  17  -8 8603.98 870.319   6
  17  -5  -5 16942.5 2190.36   1
  12   5  -5 14947.2 1833.45   1
 -17  12  -5 14859.4 1796.70   2
 -12  17  -5 13372.2 1883.14   2
  12   5  -2 4675.97 1097.08   1
 -17  12  -2 4892.82 1062.87   2
 -12  17  -2 4748.46 1070.81   2
  17  -5  -2 4217.30 1162.54   1
 -12  17   1 687.635 566.075   2
   5 -17   1 325.511 498.406   7
  -5 -12   1 486.454 503.753   7
  12   5   1 21.1524 608.313   1
  17  -5   1 1552.17 721.162   1
 -17  12   1 369.101 675.300   2
   5 -17   4 8920.75 1052.97   7
  -5 -12   4 10007.3 1032.15   7
  -5 -12   7 3522.19 884.591   7
   5 -17   7 3618.46 988.837   7
 -17  13 -12 12347.0 575.178   6
  17  -4  -9 3460.04 631.403   4
  13   4  -9 2446.88 559.472   4
  -4 -13  -9 2981.32 521.797   6
 -13  17  -9 5049.54 786.164   6
 -17  13  -9 2905.63 646.366   6
 -13  17  -9 3574.86 572.586   4
 -13  17  -6 18784.6 963.451   4
  -4 -13  -6 19037.5 1101.98   5
  -4 -13  -6 18539.8 967.100   6
  17  -4  -6 16429.3 2217.39   1
 -13  17  -6 14336.2 2120.30   2
 -17  13  -6 18708.2 1082.79   6
  13   4  -6 19546.2 2221.03   1
 -17  13  -6 15783.5 1913.82   2
   4 -17  -6 18409.6 1098.04   5
 -17  13  -3 12956.5 1528.32   2
 -13  17  -3 9733.85 1457.00   2
  17  -4  -3 10629.2 1634.00   1
  13   4  -3 10433.8 1446.20   1
   4 -17   0 24133.9 1438.57   7
  17  -4   0 22689.4 1694.51   1
 -17  13   0 25561.5 1855.02   2
  13   4   0 22622.9 1753.24   1
 -13  17   0 23352.0 1752.33   2
   4 -17   3 21820.7 1456.13   7
  -4 -13   3 20436.0 1376.24   7
 -17  13   6 2299.86 646.108   3
   4 -17   6 2076.28 788.262   7
  -4 -13   6 1313.25 753.291   7
 -13  17   6 1792.96 538.806   3
 -14  17 -10 16728.8 1045.48   6
  14   3 -10 15782.7 947.520   4
 -14  17 -10 12263.3 777.259   4
 -17  14 -10 14135.4 953.292   6
  17  -3 -10 14450.8 915.426   4
 -14  17  -7 14836.8 2140.24   2
  14   3  -7 15272.3 2096.23   1
 -14  17  -7 16422.0 932.113   4
 -14  17  -7 14290.9 1051.95   6
 -17  14  -7 16431.4 1049.75   6
  17  -3  -7 16316.7 2298.20   1
 -17  14  -7 15535.5 2075.28   2
  -3 -14  -7 16919.1 953.684   6
 -17  14  -4 15529.9 1689.26   2
  17  -3  -4 16685.5 2053.75   1
  14   3  -4 16113.0 1864.90   1
 -14  17  -4 14188.6 1799.16   2
 -17  14  -1 4868.12 1107.62   2
  14   3  -1 4534.56 1069.37   1
  17  -3  -1 3136.03 993.285   1
 -14  17  -1 5205.28 1078.56   2
  -3 -14   2 15297.1 1193.08   7
   3 -17   2 16146.1 1200.17   7
  14   3   2 16327.8 1269.79   1
 -17  14   2 16271.3 1356.32   2
  -3 -14   5 4105.25 842.366   7
 -17  14   5 4767.88 671.950   3
   3 -17   5 5100.82 943.382   7
 -14  17   5 5577.05 688.101   3
 -17  15 -11 1052.61 445.814   6
 -15  17 -11 65.3240 399.685   6
  15   2 -11 744.550 364.959   4
  17  -2  -8 11708.4 867.774   4
  15   2  -8 10987.3 835.041   4
  -2 -15  -8 11392.6 789.969   6
 -15  17  -8 8893.15 776.545   4
 -17  15  -8 12491.9 975.580   6
 -15  17  -8 12136.8 961.324   6
 -15  17  -5 16349.9 1968.10   2
 -17  15  -5 11604.8 1628.24   2
 -17  15  -5 15897.6 941.548   6
   2 -17  -5 15472.2 1020.52   5
  -2 -15  -5 15909.0 1019.00   5
  -2 -15  -5 16237.5 841.978   6
  15   2  -5 14299.3 1927.86   1
  17  -2  -5 16684.0 2237.52   1
  15   2  -2 65367.9 3257.30   1
 -15  17  -2 59138.8 3130.05   2
 -17  15  -2 66682.1 3254.56   2
  17  -2  -2 66370.7 3403.73   1
   2 -17   1 4609.54 756.486   7
 -15  17   1 3818.65 789.498   2
 -17  15   1 3740.67 813.264   2
  15   2   1 5328.66 939.591   1
  -2 -15   1 3803.25 720.939   7
  17  -2   1 3779.79 870.235   1
  -2 -15   4 6036.94 924.315   7
   2 -17   4 5901.40 946.694   7
 -17  15   7 27817.7 1437.95   3
  -2 -15   7 27822.7 2107.89   7
  17  -1  -9 1855.34 527.099   4
  16   1  -9 1747.29 517.750   4
 -17  16  -9 3299.16 702.593   6
 -16  17  -9 2500.67 667.370   6
   1 -17  -6 2871.40 498.274   6
 -16  17  -6 1884.55 1148.16   2
 -17  16  -6 2053.42 1175.01   2
   1 -17  -6 2310.05 616.525   5
 -17  16  -6 2186.10 528.776   6
 -16  17  -6 2067.23 546.870   6
  17  -1  -6 2923.34 1305.63   1
  -1 -16  -6 3449.54 547.830   6
  16   1  -6 514.792 1200.34   1
  -1 -16  -6 2191.71 572.597   5
 -16  17  -3 6888.19 1264.68   2
 -17  16  -3 7239.93 1273.94   2
  17  -1  -3 6847.97 1406.32   1
  16   1  -3 8452.43 1493.89   1
  16   1   0 6363.09 1162.72   1
 -16  17   0 7015.61 1138.52   2
 -17  16   0 7534.22 1203.86   2
  17  -1   0 6936.33 1139.14   1
   1 -17   3 12923.8 1181.46   7
  -1 -16   3 11204.9 1100.69   7
 -17  16   6 7664.77 827.380   3
  -1 -16   6 9063.42 1245.22   7
   1 -17   6 7997.00 1191.42   7
 -16  17   6 7095.55 799.043   3
  17   0 -10 1603.35 466.205   4
 -17  17 -10 1121.72 514.544   6
 -17  17  -7-464.092 575.203   6
   0 -17  -7 250.062 431.386   6
   0 -17  -7-532.011 528.679   5
 -17  17  -4 78303.9 3985.97   2
  17   0  -4 87619.0 4532.07   1
 -17  17  -1 65.1344 740.948   2
  17   0  -1 28.1087 755.068   1
   0 -17   2 3148.36 674.878   7
   0 -17   5-25.2736 595.682   7
 -17  17   5-205.321 494.847   3
   0  18  -9 60.6619 458.670   6
   0  18  -9-425.009 525.163   4
 -18   0  -9-489.519 523.506   6
   0  18  -6 40036.0 1546.09   4
 -18   0  -6 41071.2 1624.68   6
   0  18  -3-353.077 761.206   1
   0  18   0 82653.2 3498.81   1
 -18   0   6 652.294 507.549   3
  -1  18 -10 2285.32 538.583   4
 -18   1 -10 1740.06 476.213   6
   1  17 -10 2386.13 538.684   4
 -17  -1 -10 1723.16 493.779   6
   1  17  -7 16472.1 1021.88   4
  17 -18  -7 15667.3 1042.33   5
  -1  18  -7 17221.7 1053.82   4
  18 -17  -7 16940.3 1079.18   5
 -18   1  -7 17489.7 1104.25   6
 -17  -1  -7 17831.4 1123.37   6
   1  17  -4 5460.15 563.573   4
   1  17  -4 4540.53 1084.98   1
  -1  18  -4 5471.45 558.890   4
  -1  18  -4 5139.47 1430.28   2
  -1  18  -4 6379.93 1172.02   1
   1  17  -1 7260.67 1181.90   1
  -1  18  -1 6817.72 1093.92   1
   1  17   2 21263.3 1795.25   1
  -1  18   2 21645.1 1788.39   1
 -18   1   5 22905.0 1327.92   3
 -17  -1   5 23285.9 1323.79   3
   2  16 -11 3027.62 445.759   4
 -16  -2 -11 3296.97 436.950   6
 -18   2 -11 3323.16 437.752   6
  -2  18 -11 2820.11 462.453   4
  -2  18  -8 9212.27 872.246   4
   2  16  -8 7949.44 789.031   4
 -18   2  -8 9874.44 914.218   6
 -16  -2  -8 8439.05 842.827   6
  -2  18  -5 13457.7 1494.89   1
   2  16  -5 14660.4 862.728   4
  -2  18  -5 14701.0 869.814   4
 -16  -2  -5 12600.5 875.635   6
 -18   2  -5 13181.8 884.344   6
  -2  18  -5 15490.2 2121.58   2
   2  16  -5 15730.4 1760.06   1
   2  16  -2 2196.17 886.413   1
  -2  18  -2 1439.18 708.710   1
   2  16   1 22917.0 1786.34   1
  -2  18   1 24424.1 1857.67   1
  16 -18   4 8278.30 965.424   7
  -3  18  -9 2665.42 576.500   6
  -3  18  -9 3653.40 665.958   4
 -18   3  -9 4532.85 729.510   6
   3  15  -9 3962.81 679.986   4
 -15  -3  -9 3512.54 631.524   6
   3  15  -6 275.068 796.457   1
  15 -18  -6 503.184 474.395   5
  -3  18  -6 967.262 478.750   4
   3  15  -6 351.724 1162.37   2
 -15  -3  -6 478.438 498.759   6
 -18   3  -6 1078.52 1077.24   2
  -3  18  -6 297.805 1071.70   2
 -18   3  -6 1277.18 532.391   6
   3  15  -6 924.791 452.704   4
  -3  18  -3 18094.3 1592.17   1
  -3  18  -3 21273.6 2258.54   2
 -18   3  -3 18905.0 2062.17   2
   3  15  -3 19040.7 1750.07   1
  -3  18   0 33496.2 2110.43   1
   3  15   0 33596.7 2134.81   1
  15 -18   3 47140.3 2013.80   7
   3  15   3 43955.9 2541.31   1
  15 -18   6 54454.3 2816.39   7
 -18   3   6 62940.7 2195.17   3
   4  14 -10 2630.24 570.282   4
 -14  -4 -10 2656.82 514.248   6
 -18   4 -10 1662.56 522.980   6
  -4  18 -10 2040.24 493.622   6
  -4  18 -10 2487.92 583.854   4
   4  14  -7 56045.5 1934.48   4
  -4  18  -7 57975.2 1983.22   4
 -18   4  -7 55914.4 1996.20   6
  14 -18  -7 61129.0 2035.35   5
 -14  -4  -7 55458.0 1995.11   6
  -4  18  -4 12050.5 1306.70   1
 -18   4  -4 11875.9 1669.39   2
   4  14  -4 10117.3 1344.41   1
  -4  18  -4 11346.2 1940.68   2
  -4  18  -1 55959.0 2672.70   1
 -18   4  -1 55769.4 3243.29   2
   4  14  -1 57922.4 2835.48   1
  14 -18   2 21390.1 1183.73   7
   4  14   2 22935.5 1728.54   1
  14 -18   5 11633.6 1234.77   7
 -18   4   5 13202.2 992.595   3
 -14  -4   5 11887.3 942.324   3
  -5  18 -11 2659.61 468.990   4
   5  13 -11 2471.43 447.470   4
 -13  -5 -11 3360.03 431.055   6
  -5  18 -11 2923.82 406.296   6
 -18   5 -11 3459.90 482.049   6
   5  13  -8 13484.5 992.055   4
 -18   5  -8 15008.0 1056.46   6
  -5  18  -8 13882.3 1009.52   4
 -13  -5  -8 14091.5 989.251   6
   5  13  -5 24297.6 2104.77   1
  13 -18  -5 22631.6 1187.31   5
   5  13  -5 23951.3 1075.08   4
  -5  18  -5 26810.0 1178.15   4
 -18   5  -5 23470.0 1150.79   6
 -13  -5  -5 23614.9 1130.84   6
  -5  18  -5 28890.6 2777.15   2
 -18   5  -5 24989.5 2298.65   2
  -5  18  -2 23435.7 1668.59   1
 -18   5  -2 23205.4 2131.27   2
  -5  18  -2 28479.0 2420.52   2
   5  13  -2 23194.6 1844.12   1
  13 -18   1 17261.2 1015.03   7
  -5  18   1 15675.1 1484.34   1
  -5  18   1 19036.6 1605.36   2
   5  13   1 17406.8 1499.37   1
  13 -18   4 10688.8 1088.20   7
  13 -18   7 20571.8 1779.02   7
 -18   6 -12 1220.46 273.803   6
  -6  18 -12 1423.19 291.113   4
  -6  18  -9 4094.54 674.462   6
  -6  18  -9 4240.49 649.710   4
 -12  -6  -9 4562.57 664.054   6
 -18   6  -9 4609.56 722.365   6
   6  12  -9 5428.98 704.839   4
  12 -18  -6 7331.77 765.103   5
  18 -12  -6 8695.94 802.936   4
   6  12  -6 9329.23 750.850   4
  -6  18  -6 9203.56 750.028   4
 -12  -6  -6 8176.54 774.158   6
   6  12  -6 7619.60 1445.37   1
 -18   6  -6 6529.34 1443.24   2
 -18   6  -6 8294.92 777.955   6
  -6  18  -6 6990.46 1742.13   2
  -6  18  -3 12681.2 1284.48   1
 -18   6  -3 11835.4 1529.41   2
   6  12  -3 15300.1 1599.79   1
  -6  18  -3 15530.7 1922.66   2
   6  12   0 7323.38 1185.94   1
  12 -18   0 7725.18 708.604   7
 -18   6   0 8475.22 1417.55   2
  -6  18   0 7878.72 1089.13   1
  -6  18   0 9227.13 1283.78   2
   6  12   3 10623.1 1184.76   1
  12 -18   3 12503.6 1053.37   7
 -12  -6   3 12005.8 972.654   7
  12 -18   6 31747.5 2116.22   7
 -18   6   6 35519.9 1584.40   3
  -7  18 -10 2438.39 555.565   4
  -7  18 -10 2674.86 559.797   6
 -11  -7 -10 2999.69 516.552   6
 -18   7 -10 4311.40 658.779   6
   7  11 -10 4099.89 609.510   4
   7  11  -7 1932.68 556.281   4
   7  11  -7 2361.19 1540.36   2
  18 -11  -7 2503.71 605.538   4
  -7  18  -7 1790.47 512.853   4
 -11  -7  -7 1597.33 565.286   6
 -18   7  -7 2210.05 642.637   6
  18 -11  -7 1808.19 1125.82   1
 -18   7  -7 2975.10 1256.52   2
   7  11  -7 2556.63 1289.49   1
  -7  18  -7 3212.22 1507.95   2
  11 -18  -7 2387.24 592.135   5
 -18   7  -4 5077.99 1139.69   2
  -7  18  -4 6081.56 1550.32   2
   7  11  -4 5765.83 1271.65   1
  -7  18  -4 6133.41 947.104   1
  -7  18  -1 6630.64 989.308   1
 -18   7  -1 6160.19 1321.15   2
  -7  18  -1 7163.40 1258.60   2
   7  11  -1 6758.80 1134.02   1
  11 -18   2 7266.69 777.014   7
 -11  -7   2 6102.44 741.391   7
   7  11   2 6510.92 1009.61   1
  11 -18   5 6975.19 1043.68   7
 -11  -7   5 6215.60 789.784   7
 -18   7   5 6255.18 720.751   3
  -8  18 -11 3028.13 450.828   4
 -18   8 -11 2426.69 465.132   6
  -8  18 -11 1886.48 418.198   6
 -10  -8 -11 2678.49 375.652   6
   8  10 -11 2458.50 449.847   4
  18 -10  -8 8709.73 884.269   4
   8  10  -8 10164.9 886.998   4
  -8  18  -8 9290.23 828.340   4
 -18   8  -8 9223.84 834.539   6
 -10  -8  -8 9581.15 842.793   6
  10 -18  -5 6818.72 714.418   5
  -8  18  -5 8370.17 680.156   4
 -18   8  -5 6569.34 1301.97   2
   8  10  -5 6569.69 1322.68   1
  -8  18  -5 9258.73 1677.16   2
 -10  -8  -5 7494.38 671.728   6
  -8  18  -2 41529.0 2123.08   1
  -8  18  -2 46665.3 2958.01   2
 -18   8  -2 39186.6 2516.31   2
   8  10  -2 46472.4 2602.34   1
  10 -18   1 12243.3 909.896   7
  -8  18   1 12779.3 1260.58   2
 -18   8   1 12410.4 1593.97   2
   8  10   1 13160.5 1295.42   1
 -10  -8   4 81843.7 2853.39   7
  10 -18   4 83491.0 3131.64   7
  10 -18   7 22517.5 1881.80   7
 -18   9 -12 1891.39 307.512   6
  18  -9  -9 16648.5 1105.45   4
   9   9  -9 14930.8 1023.64   4
  -9  18  -9 15868.1 1025.19   4
  -9  18  -9 18313.8 1138.91   6
 -18   9  -9 17277.9 1069.72   6
  -9  -9  -9 16041.2 972.293   6
  -9  -9  -6 5356.74 651.496   6
  18  -9  -6 6172.95 695.259   4
 -18   9  -6 5866.59 1335.89   2
   9   9  -6 6464.74 658.495   4
 -18   9  -6 4733.73 655.551   6
  -9  18  -6 5239.03 600.988   4
   9   9  -6 5481.73 1332.02   1
   9 -18  -6 5047.31 670.220   5
  -9  18  -6 4936.69 1396.80   2
  -9  18  -3 42336.1 2931.01   2
   9   9  -3 39726.7 2497.89   1
  -9  18  -3 39110.0 1996.09   1
 -18   9  -3 36115.5 2478.91   2
  -9  18   0 96153.1 3708.77   2
   9 -18   0 101342. 2987.04   7
 -18   9   0 97764.2 3959.54   2
   9   9   0 94743.2 3658.52   1
   9 -18   3 41035.8 1965.33   7
  -9  -9   3 40044.7 1835.92   7
   9   9   3 40045.2 2017.40   1
 -18   9   6 6555.98 793.087   3
   9 -18   6 5235.32 1052.63   7
  -9  -9   6 5625.85 894.218   7
  -9  18   6 6052.02 723.329   3
  10   8 -10 8200.82 757.983   4
 -10  18 -10 9100.38 722.636   4
  -8 -10 -10 8011.72 618.438   6
 -10  18 -10 8709.70 843.598   6
 -18  10 -10 9598.87 815.331   6
  18  -8  -7 20147.2 1184.05   4
  10   8  -7 23610.1 1204.25   4
  10   8  -7 19434.6 2282.38   1
 -10  18  -7 23092.4 1136.32   4
  -8 -10  -7 22224.6 1160.74   6
  18  -8  -7 20238.6 2354.90   1
 -18  10  -7 21475.3 1192.03   6
   8 -18  -7 23871.5 1233.10   5
 -18  10  -7 18218.2 2261.62   2
 -10  18  -7 21683.4 2424.98   2
  10   8  -4 85349.7 3967.86   1
 -10  18  -4 89898.5 4418.49   2
 -18  10  -4 80117.4 3802.73   2
 -18  10  -1 12269.0 1442.79   2
  10   8  -1 12840.4 1452.20   1
 -10  18  -1 13894.6 1509.20   2
  -8 -10   2 44282.1 1944.13   7
   8 -18   2 44433.3 1934.72   7
  10   8   2 44422.4 2205.48   1
   8 -18   5 7368.91 1054.51   7
 -18  10   5 8714.71 841.535   3
  -8 -10   5 7535.49 926.706   7
 -11  18 -11 1601.19 423.929   6
  11   7 -11 3711.74 482.151   4
 -18  11 -11 4255.15 533.182   6
 -11  18 -11 2410.53 420.432   4
  18  -7  -8 16343.8 1068.26   4
  11   7  -8 17972.7 1094.50   4
 -18  11  -8 17674.3 1100.56   6
 -11  18  -8 16949.3 1022.94   4
  -7 -11  -8 17882.6 1011.10   6
 -11  18  -8 18607.5 1179.88   6
  18  -7  -5 4781.43 1412.15   1
 -18  11  -5 5303.59 1296.50   2
  11   7  -5 6158.48 1366.50   1
  -7 -11  -5 6864.74 637.238   6
 -18  11  -5 5737.14 626.670   6
 -11  18  -5 5984.74 573.648   4
 -11  18  -5 5268.51 1431.89   2
   7 -18  -5 5800.65 690.699   5
 -18  11  -2 6968.69 1219.80   2
  11   7  -2 7431.84 1216.97   1
 -11  18  -2 6512.65 1247.91   2
  11   7   1 6447.95 999.754   1
 -18  11   1 6599.94 1151.60   2
   7 -18   1 7211.86 817.254   7
  -7 -11   1 6183.89 798.089   7
  18  -7   1 6054.10 923.424   1
 -11  18   1 6693.25 950.255   2
   7 -18   4 6408.47 920.459   7
  -7 -11   4 5783.21 830.975   7
  -7 -11   7 3038.40 895.492   7
   7 -18   7 796.274 675.758   7
 -18  12 -12 4741.09 376.564   6
  18  -6  -9 11698.6 928.290   4
  12   6  -9 9375.33 837.228   4
 -12  18  -9 11519.8 832.402   4
  -6 -12  -9 9955.70 771.256   6
 -18  12  -9 10379.8 893.584   6
 -12  18  -9 12714.9 1002.42   6
 -18  12  -6 29856.6 2539.90   2
 -18  12  -6 30191.2 1357.63   6
 -12  18  -6 30466.9 1261.37   4
  -6 -12  -6 30735.9 1290.29   6
  18  -6  -6 31455.1 2886.48   1
 -12  18  -6 30925.7 2784.25   2
  12   6  -6 31982.8 2739.32   1
   6 -18  -6 32827.5 1472.36   5
  18  -6  -3 11641.8 1763.10   1
  12   6  -3 10347.5 1464.07   1
 -18  12  -3 11755.8 1460.67   2
 -12  18  -3 10929.6 1520.98   2
  12   6   0 7403.23 1089.55   1
 -18  12   0 8750.41 1271.74   2
   6 -18   0 8483.77 876.004   7
  18  -6   0 8231.91 1187.83   1
 -12  18   0 7069.72 1032.81   2
   6 -18   3 14514.4 1216.74   7
  -6 -12   3 13042.8 1109.98   7
 -18  12   6 8137.56 816.843   3
  -6 -12   6 8767.95 1161.03   7
 -12  18   6 7625.45 791.839   3
   6 -18   6 9219.47 1228.45   7
  13   5 -10 1482.94 475.537   4
  18  -5 -10 2056.83 532.236   4
  -5 -13 -10 1848.81 394.749   6
 -18  13 -10 618.330 511.327   6
 -13  18 -10 2672.01 615.660   6
 -13  18 -10 1241.27 416.013   4
 -18  13  -7 21973.6 1190.97   6
 -13  18  -7 19064.8 2318.03   2
  13   5  -7 22055.8 1155.90   4
 -13  18  -7 22252.3 1096.84   4
  -5 -13  -7 21803.5 1106.23   6
 -18  13  -7 18484.9 2206.19   2
  18  -5  -7 20693.3 2456.15   1
  13   5  -7 22029.2 2442.79   1
   5 -18  -7 20924.7 1201.19   5
  13   5  -4 9420.82 1604.10   1
 -18  13  -4 9371.12 1405.75   2
 -13  18  -4 8753.36 1473.66   2
  18  -5  -4 9274.22 1751.10   1
 -18  13  -1 15306.0 1596.11   2
 -13  18  -1 16750.1 1602.19   2
  18  -5  -1 15315.7 1611.78   1
  13   5  -1 17008.3 1649.36   1
  -5 -13   2 22055.3 1410.43   7
   5 -18   2 22652.3 1418.48   7
 -18  13   2 25451.5 1805.84   2
  13   5   2 25107.4 1609.09   1
   5 -18   5 25103.0 1815.15   7
  -5 -13   5 25503.3 1745.49   7
 -18  13   5 24995.1 1316.03   3
 -13  18   5 23178.3 1249.16   3
  14   4 -11 1537.96 376.283   4
 -14  18 -11 709.652 395.175   6
 -18  14 -11 2074.16 456.755   6
  18  -4  -8 42038.4 1581.83   4
  14   4  -8 39660.6 1565.68   4
 -14  18  -8 38765.9 1525.26   4
 -18  14  -8 39638.5 1649.48   6
 -14  18  -8 42852.0 1754.44   6
  -4 -14  -8 40671.0 1479.79   6
 -18  14  -5 11810.0 1659.66   2
 -14  18  -5 12756.6 760.785   4
  -4 -14  -5 12876.4 769.474   6
 -18  14  -5 11888.7 823.705   6
  18  -4  -5 11151.7 1981.10   1
  -4 -14  -5 12012.1 874.532   5
 -14  18  -5 10028.9 1673.67   2
   4 -18  -5 11710.3 926.005   5
  14   4  -5 12181.1 1758.14   1
 -18  14  -2 21066.3 1876.94   2
  18  -4  -2 21381.9 2058.06   1
 -14  18  -2 21773.0 1869.77   2
  14   4  -2 21641.2 1930.24   1
 -14  18   1 62587.9 2732.49   2
  -4 -14   1 60116.8 2433.18   7
  18  -4   1 59551.0 2659.50   1
 -18  14   1 60354.1 2847.82   2
  14   4   1 61901.1 2812.38   1
   4 -18   1 57446.9 2371.83   7
  -4 -14   4 11897.4 1185.11   7
   4 -18   4 12702.3 1248.46   7
 -18  14   7 63264.0 2258.34   3
 -15  18  -9 1591.16 453.898   4
  18  -3  -9 1837.13 536.987   4
  15   3  -9 1031.04 481.780   4
 -18  15  -9 890.711 551.427   6
  -3 -15  -9 2130.82 447.235   6
 -15  18  -9 2359.71 682.975   6
 -15  18  -6 54816.0 1754.76   4
 -18  15  -6 54459.7 3537.72   2
 -18  15  -6 55574.2 1923.72   6
  18  -3  -6 55657.9 3828.78   1
  15   3  -6 58164.3 3886.06   1
  -3 -15  -6 56670.9 1784.78   6
  -3 -15  -6 55824.8 1969.34   5
 -15  18  -6 54006.9 3638.45   2
   3 -18  -6 55990.3 2015.08   5
  18  -3  -3 44879.4 3115.02   1
  15   3  -3 47774.8 3035.37   1
 -18  15  -3 43192.4 2766.61   2
 -15  18  -3 39890.3 2655.36   2
   3 -18   0 36372.6 1888.47   7
  18  -3   0 33002.2 2136.26   1
 -15  18   0 37005.8 2298.39   2
  15   3   0 33705.4 2204.42   1
 -18  15   0 36785.9 2288.37   2
   3 -18   3 18648.7 1384.93   7
  -3 -15   3 17566.3 1351.12   7
 -18  15   6 342.275 511.059   3
  -3 -15   6 1497.03 784.724   7
   3 -18   6 1635.99 824.627   7
 -15  18   6 376.195 543.104   3
 -18  16 -10-10.7720 505.907   6
  18  -2 -10 755.638 391.208   4
  16   2 -10 218.599 375.307   4
 -16  18 -10 660.967 517.671   6
 -16  18  -7 52227.6 1722.95   4
  -2 -16  -7 55460.5 1756.55   6
 -16  18  -7 52806.7 1976.33   6
 -18  16  -7 52301.6 1913.29   6
   2 -18  -7 51832.8 1905.68   5
 -16  18  -4 4970.42 1239.32   2
 -18  16  -4 6965.77 1298.02   2
  18  -2  -4 7411.43 1601.17   1
  16   2  -4 7806.42 1562.80   1
  16   2  -1 22390.5 1891.21   1
 -16  18  -1 20778.5 1896.69   2
 -18  16  -1 25061.7 2057.92   2
  18  -2  -1 20043.6 1795.40   1
   2 -18   2 2075.42 601.025   7
  -2 -16   2 1699.95 613.475   7
 -18  16   5 14378.2 1016.55   3
   2 -18   5 13718.3 1414.89   7
  -2 -16   5 15433.7 1488.49   7
 -16  18   5 13289.1 1000.52   3
 -18  17 -11 1270.74 415.665   6
 -17  18 -11 769.980 380.709   6
  -1 -17  -8 13102.0 798.738   6
 -18  17  -8 12791.3 967.331   6
 -17  18  -8 13842.0 1021.14   6
  18  -1  -5 22268.3 2515.29   1
  -1 -17  -5 22287.9 1007.44   6
   1 -18  -5 22419.0 1014.14   6
 -18  17  -5 16519.1 2014.29   2
 -17  18  -5 19868.5 2228.34   2
  17   1  -5 21454.5 2448.23   1
   1 -18  -5 20148.2 1175.91   5
 -18  17  -5 19723.2 1073.39   6
  -1 -17  -5 20347.8 1192.52   5
  17   1  -2 20947.6 1983.74   1
  18  -1  -2 21979.8 2056.80   1
 -18  17  -2 21568.0 1974.61   2
 -17  18  -2 21839.0 1994.14   2
 -17  18   1 6822.36 1028.70   2
 -18  17   1 7886.08 1102.91   2
  18  -1   1 8321.60 1189.82   1
  -1 -17   1 6928.71 954.222   7
  17   1   1 8133.82 1170.59   1
   1 -18   1 6905.30 907.427   7
 -18  17   4 5431.75 717.161   3
   1 -18   4 6090.14 949.175   7
  -1 -17   4 5917.07 956.414   7
 -17  18   4 6275.46 743.244   3
 -18  17   7 17727.1 1179.86   3
 -17  18   7 16562.1 1111.35   3
 -18  18  -9 713.256 577.332   6
 -18  18  -6 381.252 1018.67   2
 -18  18  -6 1013.63 551.915   6
   0 -18  -6 2104.99 468.776   6
  18   0  -6 1465.87 1206.65   1
   0 -18  -6 440.788 475.073   5
 -18  18  -3 341.288 832.001   2
  18   0  -3 67.9212 904.246   1
  18   0   0 89943.2 3710.94   1
 -18  18   0 89055.3 3778.82   2
   0 -18   3 5.14338 535.172   7
   0 -18   6 44682.4 2637.31   7
 -18  18   6 41866.4 1811.09   3
   0  19 -10 16741.6 887.983   4
 -19   0 -10 17455.8 862.614   6
  19 -19  -7-158.315 534.000   5
 -19   0  -7-948.616 609.060   6
   0  19  -7-34.9895 459.258   4
   0  19  -4 10267.1 731.286   4
 -19   0  -4 10269.9 761.117   6
 -19   0  -4 9746.13 844.939   5
   0  19  -4 10983.6 1498.56   1
   0  19  -1 285.991 754.436   1
   0  19   2 2394.10 897.513   1
 -19   0   5-8.00250 566.879   3
   1  18 -11 12843.7 683.714   4
  -1  19 -11 13715.4 705.886   4
 -18  -1 -11 15366.5 672.242   6
 -19   1 -11 14857.5 662.574   6
   1  18  -8 8919.95 802.922   4
 -19   1  -8 8570.89 827.970   6
 -18  -1  -8 8962.28 861.959   6
  -1  19  -8 7916.62 800.724   4
   1  18  -5 293.524 862.728   1
  -1  19  -5 1466.74 472.203   4
   1  18  -5 1024.82 1300.35   2
 -19   1  -5 673.262 468.807   6
   1  18  -5 1653.91 466.840   4
  -1  19  -5 1002.06 777.117   1
  -1  19  -5 1605.60 1171.46   2
 -18  -1  -5 75.1980 462.269   6
   1  18  -2 10421.8 1321.91   1
  -1  19  -2 11096.9 1360.31   1
  -1  19   1 5231.64 1093.75   1
   1  18   1 5901.85 1193.18   1
 -18  -1   4 31983.8 1545.66   3
 -19   1   4 30007.7 1509.39   3
   2  17  -9 11657.7 874.687   4
  -2  19  -9 11898.9 902.117   4
 -19   2  -9 10156.9 828.875   6
  -2  19  -9 10435.3 813.127   6
 -17  -2  -9 11140.5 856.800   6
   2  17  -6 12773.5 883.119   4
  -2  19  -6 14016.9 922.517   4
 -17  -2  -6 13183.2 959.090   6
 -19   2  -6 14107.3 954.526   6
  -2  19  -6 14117.6 2275.68   2
  -2  19  -3 12384.1 1915.25   2
  -2  19  -3 11900.9 1391.13   1
   2  17  -3 11433.6 1427.32   1
  -2  19   0 4995.97 1075.73   1
   2  17   0 4962.27 1007.67   1
 -19   2   6 16132.3 1141.00   3
 -17  -2   6 16982.6 1154.08   3
   3  16 -10 12601.6 824.684   4
  -3  19 -10 13164.4 862.749   4
 -19   3 -10 13597.2 831.192   6
  -3  19 -10 12241.7 754.076   6
 -16  -3 -10 12825.8 781.775   6
   3  16  -7 11600.6 858.990   4
  -3  19  -7 13119.6 940.426   4
 -16  -3  -7 12042.8 956.987   6
 -19   3  -7 14504.0 1007.26   6
  16 -19  -7 12492.2 962.889   5
  -3  19  -4 12685.0 1450.57   1
   3  16  -4 12863.0 1563.38   1
  -3  19  -4 14784.4 852.186   4
 -19   3  -4 12915.3 1880.78   2
  -3  19  -4 14210.8 2155.56   2
 -16  -3  -4 13443.2 837.851   6
  -3  19  -1 38173.0 2276.12   1
   3  16  -1 37921.2 2330.07   1
   3  16   2 1132.40 801.594   1
 -19   3   5 8612.77 863.125   3
  16 -19   5 8762.78 1151.34   7
 -16  -3   5 9168.77 922.998   3
   4  15 -11 12161.2 681.569   4
  -4  19 -11 13094.1 728.984   4
 -15  -4 -11 12875.5 654.200   6
 -19   4 -11 14714.4 710.963   6
  -4  19  -8 2678.71 623.427   4
 -15  -4  -8 2850.60 672.608   6
 -19   4  -8 3557.41 683.617   6
   4  15  -8 2500.29 630.463   4
 -19   4  -5 3108.54 1215.48   2
   4  15  -5 2704.01 503.842   4
 -19   4  -5 3252.70 578.449   6
 -15  -4  -5 2729.18 539.607   6
  -4  19  -5 2853.14 1411.47   2
   4  15  -5 3434.56 1186.82   1
  -4  19  -5 4234.15 583.765   4
  -4  19  -2 37871.6 2229.90   1
  -4  19  -2 38907.6 2961.51   2
 -19   4  -2 38254.3 2807.53   2
   4  15  -2 41317.5 2507.24   1
   4  15   1 26989.7 1975.26   1
  -4  19   1 30064.4 2072.00   1
  15 -19   4 10411.5 1069.79   7
 -19   4   4 9471.14 888.100   3
  -5  19  -9 722.458 543.358   4
  -5  19  -9 996.024 539.376   6
 -14  -5  -9 1534.35 554.074   6
 -19   5  -9 2321.18 599.248   6
   5  14  -9 826.921 523.798   4
  14 -19  -6 697.241 542.625   5
 -19   5  -6 2293.99 1168.74   2
  -5  19  -6 1371.44 459.226   4
   5  14  -6 1880.79 527.514   4
 -14  -5  -6 1069.62 524.390   6
 -19   5  -6 1863.97 545.090   6
   5  14  -6 1854.54 1373.37   2
   5  14  -6 1449.04 970.774   1
  -5  19  -6-166.607 1199.77   2
  -5  19  -3 33950.9 2104.10   1
  -5  19  -3 34433.2 2736.99   2
 -19   5  -3 33135.9 2590.56   2
   5  14  -3 34331.0 2342.04   1
  -5  19   0 33893.4 2140.79   1
  -5  19   0 38351.7 2487.77   2
   5  14   0 35675.6 2172.60   1
  14 -19   3 6504.28 792.367   7
   5  14   3 5251.27 1052.80   1
 -19   5   6 3730.94 675.966   3
  14 -19   6 2361.78 761.929   7
   6  13 -10 7680.26 719.166   4
  -6  19 -10 7390.24 702.540   4
 -13  -6 -10 8628.11 678.264   6
  -6  19 -10 6985.51 704.171   6
   6  13  -7 25453.4 1235.15   4
  -6  19  -7 24999.2 1235.32   4
 -13  -6  -7 22576.0 1267.38   6
 -19   6  -7 23608.9 1266.65   6
  13 -19  -7 23803.3 1278.74   5
 -19   6  -4 8210.86 1453.53   2
  -6  19  -4 9913.85 1215.67   1
   6  13  -4 9230.66 1434.16   1
  -6  19  -4 9657.00 1727.22   2
 -19   6  -1 13239.2 1690.63   2
   6  13  -1 14576.1 1534.25   1
  -6  19  -1 14201.0 1368.64   1
  -6  19  -1 16103.5 1831.24   2
   6  13   2 8366.35 1167.87   1
  13 -19   2 8861.93 822.738   7
 -19   6   5 7525.49 819.272   3
  13 -19   5 6451.80 959.443   7
 -13  -6   5 7443.57 818.114   3
  -6  19   5 6852.53 793.692   3
  -7  19 -11 368.601 360.232   4
   7  12 -11 125.926 323.655   4
  -7  19 -11-104.040 331.291   6
 -12  -7 -11 1064.13 322.745   6
 -19   7 -11 568.914 363.963   6
   7  12  -8 8669.93 804.205   4
  -7  19  -8 8018.06 804.663   4
 -19   7  -8 8488.61 823.961   6
 -12  -7  -8 8844.58 843.403   6
   7  12  -5 9562.79 1476.86   1
   7  12  -5 9446.72 721.730   4
  -7  19  -5 9952.22 747.124   4
  12 -19  -5 9533.84 835.045   5
 -19   7  -5 9456.46 1523.97   2
 -12  -7  -5 9663.40 762.674   6
 -19   7  -5 9250.37 752.815   6
  -7  19  -5 9966.70 1800.52   2
 -19   7  -2 1234.63 967.458   2
  -7  19  -2 775.169 1001.35   2
  -7  19  -2 1864.13 748.930   1
   7  12  -2 2158.91 983.719   1
  12 -19   1 3049.65 497.736   7
   7  12   1 2978.94 849.878   1
  -7  19   1 3811.99 888.621   2
  12 -19   4 29595.9 1800.43   7
 -12  -7   4 27499.6 1551.77   7
  -8  19  -9 4439.62 723.449   6
  -8  19  -9 4132.66 627.936   4
 -11  -8  -9 5678.95 693.917   6
 -19   8  -9 5358.11 740.599   6
   8  11  -9 4843.42 662.041   4
 -19   8  -6 34974.3 2843.00   2
  19 -11  -6 36850.8 1528.28   4
   8  11  -6 39115.3 1493.39   4
 -11  -8  -6 37621.1 1509.09   6
  -8  19  -6 36225.0 1442.31   4
 -19   8  -6 36199.4 1495.10   6
   8  11  -6 36549.3 2791.06   1
  11 -19  -6 34529.3 1506.42   5
  -8  19  -6 36125.0 3148.67   2
  -8  19  -3 13769.9 1289.75   1
 -19   8  -3 14982.2 1725.32   2
  -8  19  -3 17714.1 2069.68   2
   8  11  -3 12961.0 1611.93   1
 -19   8   0 4615.27 1206.68   2
  11 -19   0 5584.19 691.502   7
   8  11   0 6278.07 1058.43   1
  -8  19   0 5695.36 1125.74   2
   8  11   3 1585.39 610.269   1
  11 -19   3 2374.94 621.416   7
 -11  -8   3 2073.34 557.648   7
  11 -19   6 45844.7 2589.00   7
  -8  19   6 51588.0 1894.45   3
 -19   8   6 49141.2 1953.08   3
 -10  -9 -10 3985.77 501.654   6
   9  10 -10 2511.52 523.322   4
  -9  19 -10 3424.55 530.825   4
  -9  19 -10 3691.90 617.373   6
   9  10  -7 7151.61 738.818   4
  19 -10  -7 6192.29 745.745   4
 -19   9  -7 6756.29 1535.08   2
  -9  19  -7 6776.57 732.185   4
 -10  -9  -7 6271.17 758.893   6
   9  10  -7 9638.07 1702.77   1
 -19   9  -7 5877.10 736.570   6
  10 -19  -7 6562.83 751.058   5
   9  10  -4 37867.4 2626.60   1
 -19   9  -4 38420.5 2690.36   2
  -9  19  -4 46532.4 3203.63   2
  -9  19  -1 34921.9 2400.28   2
 -19   9  -1 32127.7 2386.45   2
   9  10  -1 36309.2 2285.15   1
   9  10   2 35102.2 2111.24   1
  10 -19   2 37413.9 1742.58   7
 -10  -9   2 36689.7 1781.57   7
 -19   9   5 3414.47 640.389   3
  10 -19   5 3438.63 814.547   7
 -10  -9   5 2822.02 651.512   7
  -9  19   5 3015.86 596.173   3
  10   9 -11 9015.95 606.333   4
 -10  19 -11 7644.13 590.086   4
 -10  19 -11 8177.69 609.751   6
  -9 -10 -11 9572.48 524.851   6
  19  -9  -8 8898.75 818.070   4
  10   9  -8 10338.1 874.809   4
 -10  19  -8 8746.80 787.302   4
  -9 -10  -8 8877.38 809.801   6
 -19  10  -8 8294.84 835.750   6
 -19  10  -5 1656.61 960.935   2
 -19  10  -5 3364.64 545.077   6
 -10  19  -5 3964.38 529.386   4
  -9 -10  -5 3057.59 539.179   6
  10   9  -5 4064.55 1226.88   1
  -9 -10  -5 3489.80 604.891   5
 -10  19  -5 2768.53 1122.66   2
   9 -19  -5 3064.45 632.995   5
  10   9  -2 36647.1 2404.24   1
 -19  10  -2 40368.3 2602.01   2
 -10  19  -2 41164.5 2680.99   2
  19  -9   1 34311.9 2007.13   1
 -10  19   1 38574.8 2090.22   2
 -19  10   1 39758.8 2478.22   2
  10   9   1 36492.3 2165.87   1
   9 -19   1 36086.5 1690.60   7
   9 -19   4 40617.0 2128.77   7
  -9 -10   4 38985.2 1959.66   7
 -19  10   7 7196.69 806.531   3
  11   8  -9 1491.49 544.392   4
  19  -8  -9 1421.83 575.279   4
  -8 -11  -9 1733.46 496.200   6
 -11  19  -9 1205.36 613.987   6
 -11  19  -9 1327.11 468.002   4
 -19  11  -9 519.069 548.949   6
 -11  19  -6 44722.3 1593.72   4
 -11  19  -6 46329.9 3454.23   2
 -19  11  -6 42963.4 1646.36   6
  -8 -11  -6 43810.6 1603.85   6
 -19  11  -6 42675.3 3093.43   2
   8 -19  -6 44695.2 1735.57   5
  19  -8  -6 39124.4 3234.92   1
  11   8  -6 47456.2 3255.09   1
 -19  11  -3 2184.27 983.445   2
  11   8  -3 2833.09 1035.09   1
 -11  19  -3 2329.63 1116.84   2
 -19  11   0 4723.21 1074.74   2
   8 -19   0 4892.00 699.187   7
  19  -8   0 5955.40 1081.51   1
  11   8   0 4809.21 978.596   1
 -11  19   0 4863.33 965.691   2
   8 -19   3 15031.9 1226.17   7
  -8 -11   3 13451.7 1115.32   7
   8 -19   6 38655.1 2379.73   7
  -8 -11   6 37642.4 2166.99   7
 -19  11   6 39653.8 1722.47   3
 -11  19   6 40518.1 1662.62   3
  12   7 -10 2554.13 521.387   4
 -19  12 -10 3957.01 641.056   6
 -12  19 -10 2832.46 617.501   6
 -12  19 -10 2512.31 473.438   4
  -7 -12 -10 2339.75 441.341   6
  12   7  -7 12593.7 905.301   4
  -7 -12  -7 13385.7 904.242   6
 -19  12  -7 14139.3 991.275   6
 -12  19  -7 12590.3 874.673   4
   7 -19  -7 12566.0 983.001   5
  12   7  -4 28224.8 2357.00   1
 -19  12  -4 25783.1 2213.02   2
  19  -7  -4 28346.3 2728.91   1
 -12  19  -4 29647.5 2562.24   2
 -19  12  -1 2090.08 882.867   2
  12   7  -1 2357.25 964.633   1
  19  -7  -1 2634.44 1035.53   1
 -12  19  -1 3593.87 993.194   2
  -7 -12   2 1099.30 526.940   7
   7 -19   2 1649.58 564.111   7
  12   7   2 182.710 544.356   1
 -12  19   5 10018.5 870.885   3
   7 -19   5 9874.96 1202.56   7
  -7 -12   5 9696.65 1108.95   7
 -19  12   5 8938.96 862.591   3
  13   6 -11 3386.95 417.458   4
 -13  19 -11 2901.57 386.082   4
 -13  19 -11 2268.48 467.076   6
  19  -6  -8 53737.5 1851.46   4
 -13  19  -8 54026.4 2041.38   6
  13   6  -8 53554.5 1863.25   4
 -13  19  -8 50764.1 1781.92   4
  -6 -13  -8 53988.5 1782.16   6
 -19  13  -8 51115.3 1887.73   6
 -19  13  -5 7040.00 1329.84   2
 -13  19  -5 7197.38 632.056   4
 -19  13  -5 7219.21 688.478   6
  -6 -13  -5 7366.43 758.782   5
  -6 -13  -5 7048.48 648.186   6
  19  -6  -5 6512.30 1566.92   1
   6 -19  -5 8112.47 795.366   5
  13   6  -5 7684.92 1556.03   1
 -13  19  -5 8833.42 1620.20   2
 -19  13  -2 8704.07 1344.12   2
  13   6  -2 7821.65 1312.11   1
  19  -6  -2 9871.86 1544.85   1
 -13  19  -2 10499.9 1456.37   2
   6 -19   1 14050.1 1134.83   7
 -19  13   1 15993.1 1588.69   2
 -13  19   1 14403.6 1328.93   2
  13   6   1 16450.4 1481.94   1
  -6 -13   1 14390.5 1198.70   7
  -6 -13   4 8094.35 988.452   7
   6 -19   4 8368.15 1075.99   7
 -19  13   7 28344.5 1462.41   3
  19  -5  -9 160.281 465.620   4
  14   5  -9-160.783 482.833   4
 -14  19  -9 308.100 398.975   4
  -5 -14  -9 880.828 419.019   6
 -14  19  -9 340.182 584.881   6
 -19  14  -9-592.045 632.265   6
 -14  19  -6 4887.49 1487.62   2
 -14  19  -6 2161.86 467.925   4
  14   5  -6 1061.03 1051.70   1
 -19  14  -6 5596.90 1427.99   2
  -5 -14  -6 3079.21 545.953   6
 -19  14  -6 4398.25 700.659   6
  19  -5  -6 1813.14 1285.31   1
  -5 -14  -6 3410.37 633.135   5
   5 -19  -6 2587.04 659.163   5
  14   5  -3 6321.94 1318.62   1
 -19  14  -3 4886.06 1125.22   2
  19  -5  -3 4433.66 1268.76   1
 -14  19  -3 5246.36 1257.87   2
   5 -19   0 36340.4 1876.53   7
  19  -5   0 36432.7 2249.30   1
 -19  14   0 38388.0 2433.37   2
 -14  19   0 37211.2 2276.70   2
  14   5   0 34739.5 2282.37   1
   5 -19   3 35184.3 1906.63   7
  -5 -14   3 33490.6 1863.95   7
 -19  14   6 1770.47 590.404   3
   5 -19   6 2759.41 873.379   7
  -5 -14   6 445.988 593.333   7
 -14  19   6 1746.93 639.135   3
  15   4 -10 5521.07 573.738   4
 -15  19 -10 5224.50 516.734   4
 -19  15 -10 5932.67 655.657   6
 -15  19 -10 6510.52 708.086   6
 -15  19  -7 8569.44 726.818   4
  -4 -15  -7 9590.94 763.771   6
 -15  19  -7 8636.84 879.614   6
 -19  15  -7 10211.2 887.284   6
   4 -19  -7 8901.26 864.484   5
 -15  19  -4 7382.58 1466.35   2
  15   4  -4 9799.81 1677.28   1
 -19  15  -4 7572.57 1376.71   2
   4 -19  -4 8710.90 822.550   5
  -4 -15  -4 9015.83 664.159   6
  19  -4  -4 8134.81 1622.58   1
  -4 -15  -4 7744.26 740.341   5
  19  -4  -1 31166.1 2295.91   1
  15   4  -1 31262.9 2208.12   1
 -15  19  -1 31016.6 2202.93   2
 -19  15  -1 36436.8 2466.15   2
   4 -19   2 40064.2 1998.48   7
  -4 -15   2 38950.4 1973.16   7
 -19  15   5 2412.77 617.574   3
   4 -19   5 2782.87 827.291   7
  -4 -15   5 3048.31 800.851   7
 -15  19   5 2518.21 550.348   3
 -19  16 -11 2374.07 434.726   6
 -16  19 -11 1194.84 407.493   6
 -16  19  -8 11933.3 844.999   4
  -3 -16  -8 14007.7 836.496   6
 -19  16  -8 14960.7 1032.97   6
 -16  19  -8 13837.2 1040.77   6
 -16  19  -5 6674.70 1479.86   2
 -19  16  -5 7158.04 1476.18   2
 -16  19  -5 8565.05 652.870   4
   3 -19  -5 8254.32 848.223   5
 -19  16  -5 7477.44 700.262   6
  -3 -16  -5 7214.55 630.980   6
  19  -3  -5 7891.17 1739.06   1
  -3 -16  -5 6377.50 725.030   5
  16   3  -5 8155.36 1606.07   1
 -19  16  -2 671.635 882.770   2
  19  -3  -2 826.927 896.406   1
 -16  19  -2 627.329 785.590   2
  16   3  -2 657.859 902.099   1
  -3 -16   1 37490.4 2015.55   7
   3 -19   1 38797.1 1997.45   7
 -19  16   1 37276.2 2250.88   2
  16   3   1 41924.0 2401.54   1
  -3 -16   4 13289.9 1271.77   7
   3 -19   4 13139.8 1294.55   7
 -16  19   4 13592.2 978.809   3
 -19  16   4 13316.6 957.300   3
 -16  19   7 11971.4 965.420   3
 -19  16   7 13966.3 1068.45   3
 -19  17  -9 4555.18 681.698   6
 -17  19  -9 6032.41 767.332   6
 -17  19  -6 18181.5 2327.68   2
 -19  17  -6 13299.5 1942.87   2
  -2 -17  -6 16210.1 900.614   6
 -19  17  -6 13360.0 991.990   6
 -17  19  -6 13328.7 1017.69   6
  -2 -17  -6 14194.5 1001.90   5
   2 -19  -6 12936.7 1049.19   5
  19  -2  -6 14799.5 2235.25   1
  17   2  -6 15731.3 2255.22   1
 -17  19  -3 12822.7 1614.49   2
 -19  17  -3 14305.3 1764.81   2
  19  -2  -3 16211.8 2033.13   1
  17   2  -3 13788.4 1843.44   1
 -17  19   0 4904.93 1045.66   2
 -19  17   0 5111.68 1097.94   2
  17   2   0 4049.27 989.511   1
  19  -2   0 3572.59 961.498   1
   2 -19   3 10835.1 1125.40   7
  -2 -17   3 10834.4 1146.92   7
   2 -19   6 15961.0 1639.75   7
  -2 -17   6 13586.1 1480.53   7
 -19  17   6 13224.8 1022.46   3
 -17  19   6 14300.0 1065.39   3
 -19  18 -10 345.245 452.363   6
 -18  19 -10 312.644 459.913   6
 -19  18  -7 3526.05 653.327   6
  -1 -18  -7 4032.23 550.224   6
 -18  19  -7 4065.52 716.472   6
  -1 -18  -7 3811.60 661.877   5
   1 -19  -7 2030.33 531.078   5
   1 -19  -4 31588.6 1171.33   6
  18   1  -4 30119.6 2759.48   1
  19  -1  -4 28182.0 2722.77   1
 -19  18  -4 26164.7 2329.82   2
 -19  18  -4 25057.3 1183.92   6
 -18  19  -4 27433.3 2449.07   2
  -1 -18  -4 30258.2 1143.95   6
  -1 -18  -4 26844.7 1330.79   5
   1 -19  -4 27716.1 1356.75   5
  18   1  -1 4841.54 1132.32   1
 -18  19  -1 6905.71 1295.97   2
 -19  18  -1 7029.21 1258.90   2
  19  -1  -1 5833.06 1216.87   1
  -1 -18   2 10605.3 1134.32   7
   1 -19   2 11273.1 1166.96   7
  -1 -18   5 1910.65 796.889   7
   1 -19   5 694.494 720.669   7
 -18  19   5 736.372 521.691   3
 -19  18   5 667.342 527.612   3
 -19  19 -11-64.6926 324.291   6
 -19  19  -8 1137.49 594.754   6
 -19  19  -5-1693.09 1189.50   2
   0 -19  -5 132.540 378.077   6
 -19  19  -5-1138.06 616.008   6
  19   0  -5-816.792 1172.23   1
   0 -19  -5 7.98114 537.770   5
 -19  19  -2 1167.92 925.798   2
  19   0  -2 2274.51 1085.02   1
   0 -19   1 360.412 518.776   7
   0 -19   4 10468.2 1198.46   7
 -19  19   4 9614.02 871.104   3
 -19  19   7 223.388 551.885   3
   0  20 -11 12.9672 238.991   4
 -20   0 -11 223.046 239.494   6
   0  20  -8 7547.70 755.283   4
 -20   0  -8 6864.14 748.004   6
   0  20  -5-357.266 940.390   1
   0  20  -5-39.2996 1266.82   2
   0  20  -5 121.739 399.683   4
 -20   0  -5 247.162 496.968   6
   0  20  -2 5410.28 514.513   4
 -20   0  -2 5101.14 704.160   5
   0  20  -2 5311.00 1089.36   1
 -20   0   1 138.887 479.279   3
 -20   0   1-615.039 522.734   5
   0  20   1-294.326 710.499   1
 -20   0   4 7049.91 873.804   3
   1  19  -9 10364.6 766.826   4
  -1  20  -9 10236.7 812.234   4
   1  19  -9 9762.35 744.192   6
  -1  20  -9 9303.52 768.104   6
 -20   1  -9 9684.03 787.423   6
 -19  -1  -9 11284.0 822.200   6
   1  19  -6 4228.20 612.714   4
 -19  -1  -6 3468.96 647.037   6
 -20   1  -6 4086.10 625.018   6
  -1  20  -6 3650.85 566.085   4
   1  19  -3 5943.30 559.631   4
  -1  20  -3 6758.45 577.759   4
   1  19  -3 7434.90 1317.28   1
  -1  20  -3 3614.13 1507.18   2
 -20   1  -3 5522.22 704.321   5
  -1  20  -3 6090.24 1156.87   1
 -19  -1  -3 7287.10 647.547   6
 -19  -1  -3 6397.27 736.072   5
   1  19   0 17417.1 1695.89   1
  -1  20   0 16962.0 1705.05   1
 -20   1   3 10786.9 976.008   3
 -19  -1   3 10297.7 951.476   3
 -20   1   6 6598.98 817.771   3
 -19  -1   6 6528.50 840.751   3
   2  18 -10 8978.50 668.236   4
  -2  20 -10 9169.14 701.453   4
 -18  -2 -10 10111.9 679.059   6
  -2  20 -10 8992.75 621.168   6
 -20   2 -10 9237.27 674.211   6
   2  18  -7 28550.4 1304.67   4
  -2  20  -7 29206.7 1359.50   4
  20 -18  -7 28043.9 1399.14   5
 -18  -2  -7 28345.4 1393.96   6
  18 -20  -7 30852.5 1454.34   5
 -20   2  -7 29412.4 1372.75   6
   2  18  -4 2201.02 434.122   4
 -18  -2  -4 1944.34 494.477   6
 -20   2  -4 1591.04 435.077   6
  -2  20  -4 2315.73 475.914   4
  -2  20  -4 2456.28 1376.28   2
 -18  -2  -4 2211.97 577.204   5
   2  18  -4 1955.40 1078.96   1
  -2  20  -4 2399.83 931.779   1
   2  18  -1 31431.8 2261.31   1
  -2  20  -1 30817.7 2149.02   1
   2  18   2 7636.13 1307.75   1
 -20   2   5 529.648 601.355   3
 -18  -2   5 307.985 557.052   3
 -20   3 -11 1056.73 328.969   6
   3  17 -11 89.5334 299.306   4
  -3  20 -11 992.358 349.013   4
 -17  -3 -11 1275.43 323.557   6
   3  17  -8 11630.0 887.052   4
  -3  20  -8 12688.9 956.702   4
 -17  -3  -8 11496.0 907.720   6
 -20   3  -8 11832.1 905.063   6
  -3  20  -5 20693.6 1068.89   4
   3  17  -5 20355.0 998.399   4
 -17  -3  -5 18634.7 1064.66   6
 -20   3  -5 21014.7 1072.07   6
  -3  20  -5 18220.6 2401.95   2
   3  17  -5 19484.6 1964.70   1
  -3  20  -2 8015.37 1183.47   1
   3  17  -2 8833.98 1279.15   1
  -3  20  -2 9503.61 1691.05   2
   3  17   1 7289.46 1129.33   1
  -3  20   1 8389.81 1228.55   1
 -20   3   4 8535.39 881.032   3
 -17  -3   4 8688.67 889.376   3
 -20   3   7 35709.1 1590.13   3
   4  16  -9 3440.66 573.113   4
  -4  20  -9 3607.35 617.783   4
 -20   4  -9 4432.57 657.458   6
 -16  -4  -9 3965.93 625.572   6
  -4  20  -9 2253.50 554.995   6
   4  16  -6 10518.0 1653.22   1
   4  16  -6 9116.43 749.686   4
  -4  20  -6 9766.24 805.140   4
  16 -20  -6 9445.08 864.452   5
   4  16  -6 5397.12 2024.87   2
 -16  -4  -6 9483.56 856.105   6
 -20   4  -6 9810.47 825.990   6
  -4  20  -6 8056.06 1796.56   2
   4  16  -3 13492.0 1583.85   1
  -4  20  -3 13234.1 1433.80   1
  -4  20  -3 13422.0 1991.75   2
 -20   4  -3 12092.0 1823.40   2
   4  16   0 50835.9 2787.62   1
  -4  20   0 49410.7 2745.42   1
  -4  20   0 56784.5 3201.80   2
   4  16   3 18557.9 1723.70   1
  16 -20   6 18019.2 1664.02   7
 -16  -4   6 20602.6 1249.66   3
 -20   4   6 20197.2 1238.82   3
   5  15 -10 6072.59 604.220   4
 -15  -5 -10 6449.57 593.320   6
  -5  20 -10 5337.52 611.282   4
 -20   5 -10 5505.41 614.500   6
  -5  20 -10 5414.56 582.016   6
   5  15  -7 10730.3 835.744   4
  -5  20  -7 10206.9 857.377   4
 -20   5  -7 10258.5 880.796   6
  15 -20  -7 9315.98 881.954   5
 -15  -5  -7 9491.66 874.369   6
  -5  20  -4 2531.81 840.870   1
   5  15  -4 2278.83 1012.80   1
 -15  -5  -4 2394.91 520.276   6
 -20   5  -4 3664.29 1227.85   2
 -15  -5  -4 2147.25 558.354   5
  -5  20  -4 2754.11 1269.61   2
  -5  20  -4 2571.01 469.253   4
  -5  20  -1 19976.1 1721.74   1
  -5  20  -1 23717.4 2216.86   2
   5  15  -1 20928.3 1806.65   1
   5  15   2 9738.78 1332.01   1
  15 -20   5 15027.5 1375.84   7
 -20   5   5 14706.9 1080.42   3
 -15  -5   5 15861.2 1147.42   3
 -20   6 -11 1574.61 374.971   6
   6  14 -11 1328.67 333.152   4
  -6  20 -11 1781.67 384.162   4
 -14  -6 -11 2414.13 369.713   6
  -6  20  -8 4700.95 704.374   4
 -20   6  -8 3916.35 687.446   6
 -14  -6  -8 4205.79 700.996   6
   6  14  -8 3509.51 592.232   4
   6  14  -5 36884.1 1364.34   4
  -6  20  -5 38264.4 1461.07   4
  -6  20  -5 38524.2 3238.37   2
 -14  -6  -5 37429.9 1442.58   6
 -14  -6  -5 34483.3 1438.43   5
 -20   6  -5 34843.5 2922.20   2
  14 -20  -5 35411.8 1526.43   5
 -20   6  -5 32262.0 1385.77   6
   6  14  -5 36045.3 2642.20   1
  -6  20  -2 2158.27 791.995   1
 -20   6  -2 2133.84 1002.17   2
  -6  20  -2 2520.04 1162.17   2
   6  14  -2 1141.97 804.493   1
  -6  20   1-469.260 718.904   2
   6  14   1 526.864 673.282   1
 -20   6   4 5705.60 744.510   3
  14 -20   4 4959.87 811.506   7
  -6  20   4 5620.16 748.655   3
 -20   6   7 30576.0 1502.02   3
   7  13  -9 18005.8 1032.92   4
  -7  20  -9 15933.6 1024.24   4
 -20   7  -9 19829.6 1089.37   6
  -7  20  -9 18313.9 1118.40   6
 -13  -7  -9 18945.7 1046.85   6
  13 -20  -6 6221.16 792.554   5
   7  13  -6 7000.72 684.834   4
  -7  20  -6 6981.26 719.527   4
 -13  -7  -6 7386.99 769.683   6
 -20   7  -6 8083.37 1592.70   2
 -20   7  -6 7716.41 772.967   6
   7  13  -6 9399.33 1673.48   1
  -7  20  -6 9407.86 1830.93   2
  -7  20  -3 1422.56 723.918   1
   7  13  -3 1412.81 927.615   1
 -20   7  -3 1294.23 868.124   2
  -7  20  -3 3609.30 1373.18   2
  -7  20   0 54499.9 2744.64   1
  -7  20   0 64112.0 3222.94   2
   7  13   0 56939.8 2883.63   1
  13 -20   3 9238.72 943.313   7
 -13  -7   3 9348.37 933.165   7
   7  13   3 9121.02 1177.05   1
  13 -20   6 11613.8 1307.22   7
 -20   7   6 11225.3 952.949   3
   8  12 -10 1593.52 461.546   4
 -12  -8 -10 2342.20 458.245   6
 -20   8 -10 3110.01 548.860   6
  -8  20 -10 901.163 489.107   6
  -8  20 -10 1736.19 472.704   4
 -20   8  -7 25667.7 1295.24   6
   8  12  -7 29197.4 1306.01   4
  -8  20  -7 26034.3 1278.36   4
  12 -20  -7 26528.5 1351.73   5
 -12  -8  -7 26717.4 1316.70   6
 -20   8  -4 19209.0 2052.60   2
  12 -20  -4 18508.0 1109.88   5
  -8  20  -4 21324.5 1000.08   4
  -8  20  -4 19042.9 2242.57   2
  -8  20  -4 19227.6 1566.19   1
 -12  -8  -4 18147.1 989.350   6
   8  12  -4 20904.6 2049.78   1
  -8  20  -1 55215.3 2695.94   1
 -20   8  -1 53448.8 3211.12   2
  -8  20  -1 61200.5 3359.10   2
   8  12  -1 59755.7 3019.20   1
  12 -20   2 10132.9 910.069   7
   8  12   2 9846.61 1218.72   1
 -20   8   5 3313.45 672.936   3
  12 -20   5 3528.87 842.770   7
  -8  20   5 3712.62 683.791   3
  -9  20 -11 2112.41 387.846   4
   9  11 -11 1722.84 354.006   4
 -11  -9 -11 2133.11 331.224   6
 -20   9 -11 2145.02 396.878   6
  -9  20 -11 1084.20 353.585   6
  -9  20  -8 3894.16 668.931   4
 -11  -9  -8 5473.86 703.767   6
 -20   9  -8 3798.34 669.833   6
   9  11  -8 4100.01 613.499   4
  11 -20  -5 6245.05 764.623   5
 -11  -9  -5 7019.88 679.916   6
  -9  20  -5 7313.85 675.049   4
 -20   9  -5 4491.96 1186.57   2
   9  11  -5 8409.74 1509.40   1
 -11  -9  -5 5750.36 688.780   5
 -20   9  -5 5677.82 636.997   6
  -9  20  -5 7400.32 1639.44   2
 -20   9  -2 27518.4 2285.93   2
  -9  20  -2 27490.6 1826.54   1
   9  11  -2 28533.6 2147.65   1
  -9  20  -2 31173.8 2493.74   2
  11 -20   1 20920.9 1231.71   7
   9  11   1 19210.8 1688.86   1
  11 -20   4 15708.2 1349.36   7
 -11  -9   4 15603.5 1252.97   7
 -20   9   4 16120.3 1036.59   3
  -9  20   4 16969.7 1090.73   3
 -20   9   7 5106.55 729.456   3
  10  10  -9 3304.18 580.810   4
 -10  20  -9 2854.74 560.213   4
 -10 -10  -9 3944.67 587.169   6
 -20  10  -9 4333.14 672.857   6
 -10  20  -9 3406.05 686.565   6
 -20  10  -6 2388.36 1138.20   2
  20 -10  -6 2748.90 1370.33   1
 -10 -10  -6 2698.52 604.549   6
 -20  10  -6 3204.95 628.673   6
  10  10  -6 3225.76 1264.82   1
 -10  20  -6 3129.08 1252.70   2
 -10  20  -6 3145.60 521.819   4
  10 -20  -6 2754.60 636.910   5
 -20  10  -3 13157.9 1689.53   2
  10  10  -3 11086.5 1505.72   1
 -10  20  -3 13739.1 1808.93   2
  10 -20   0 7545.06 807.359   7
 -20  10   0 6890.37 1311.94   2
  10  10   0 5845.09 1104.16   1
 -10  20   0 6335.85 1051.14   2
  10 -20   3 12977.0 1138.29   7
 -10 -10   3 11701.2 1058.50   7
 -10 -10   6 2172.43 715.286   7
 -20  10   6 2655.53 625.262   3
  10 -20   6 2039.89 793.832   7
 -10  20   6 3617.13 655.439   3
 -11  20 -10 4555.54 624.021   6
  11   9 -10 4123.80 536.488   4
 -20  11 -10 4785.92 617.394   6
  -9 -11 -10 4975.29 508.322   6
 -11  20 -10 3902.71 523.831   4
 -11  20  -7 6511.72 692.974   4
  11   9  -7 6621.74 717.708   4
 -20  11  -7 4347.67 648.081   6
   9 -20  -7 5729.18 780.764   5
  -9 -11  -7 6200.06 724.837   6
 -11  20  -4 14984.7 835.473   4
 -20  11  -4 15882.1 1877.87   2
  11   9  -4 15140.6 1823.48   1
  -9 -11  -4 14815.0 848.826   6
   9 -20  -4 16341.4 1041.38   5
 -11  20  -4 16979.4 2047.89   2
 -11  20  -1 21322.7 1911.48   2
 -20  11  -1 22744.5 2032.62   2
  11   9  -1 22333.0 1957.43   1
   9 -20   2 27726.0 1537.42   7
  -9 -11   2 26564.6 1603.35   7
  11   9   2 24858.3 1822.91   1
 -20  11   5 7117.74 784.366   3
   9 -20   5 7466.80 1099.84   7
  -9 -11   5 7849.40 1006.38   7
 -11  20   5 6945.09 769.027   3
  12   8 -11 1992.63 337.589   4
 -12  20 -11 2279.09 360.727   4
 -12  20 -11 1471.04 398.083   6
  20  -8  -8 15766.6 975.227   4
  12   8  -8 16961.8 1021.84   4
 -12  20  -8 15247.1 956.826   4
 -20  12  -8 13907.7 1010.68   6
  -8 -12  -8 15891.9 969.723   6
 -12  20  -8 15439.7 1121.57   6
 -20  12  -5 1901.72 1038.27   2
  12   8  -5 4129.81 1265.48   1
 -12  20  -5 3165.34 534.295   4
  -8 -12  -5 2783.38 517.470   6
  -8 -12  -5 3150.20 588.940   5
 -20  12  -5 3299.45 550.955   6
 -12  20  -5 2215.14 1176.33   2
  20  -8  -5 2285.65 1283.57   1
   8 -20  -5 2310.73 624.470   5
 -20  12  -2 7881.17 1341.40   2
  12   8  -2 9965.14 1416.89   1
 -12  20  -2 10162.1 1502.60   2
   8 -20   1 59848.6 2348.08   7
 -20  12   1 61491.1 3162.42   2
  12   8   1 60472.0 2901.61   1
   8 -20   4 21234.7 1593.22   7
  -8 -12   4 19479.2 1444.02   7
 -20  12   4 19030.6 1151.97   3
 -12  20   4 21288.6 1232.68   3
 -20  12   7 30548.6 1526.27   3
  -7 -13  -9 19683.8 994.925   6
  13   7  -9 20421.5 1067.11   4
 -13  20  -9 19825.7 1021.87   4
 -20  13  -9 19498.4 1118.49   6
 -13  20  -9 19651.8 1199.83   6
  -7 -13  -6 11326.7 873.979   5
 -13  20  -6 11974.3 791.976   4
 -20  13  -6 8588.23 1569.63   2
  -7 -13  -6 11769.8 835.217   6
  13   7  -6 15112.9 2074.17   1
   7 -20  -6 11851.7 957.523   5
  20  -7  -6 10525.3 1885.66   1
 -20  13  -6 11415.9 877.008   6
 -13  20  -6 14612.3 2084.03   2
 -20  13  -3 8947.81 1421.38   2
  13   7  -3 8767.90 1456.70   1
  20  -7  -3 10208.3 1696.29   1
 -13  20  -3 8149.47 1472.79   2
  20  -7   0 63490.5 3021.12   1
 -13  20   0 56928.7 2923.13   2
   7 -20   0 59789.1 2430.07   7
 -20  13   0 59825.6 3155.82   2
  13   7   0 62696.9 3050.77   1
  -7 -13   3 827.311 486.489   7
   7 -20   3 1127.99 586.432   7
 -20  13   6 7841.15 859.089   3
   7 -20   6 6676.79 1124.24   7
  -7 -13   6 7036.68 1081.32   7
 -13  20   6 6360.16 749.416   3
 -14  20 -10 864.538 381.249   4
  14   6 -10 1884.00 447.753   4
 -14  20 -10 1584.11 550.760   6
 -20  14 -10 1556.83 516.946   6
  -6 -14 -10 889.009 339.569   6
 -14  20  -7 27882.6 1256.02   4
 -20  14  -7 28151.3 1354.15   6
   6 -20  -7 29781.2 1425.03   5
  -6 -14  -7 27851.6 1238.63   6
  14   6  -4 5152.17 1312.25   1
 -20  14  -4 3983.23 1142.05   2
  20  -6  -4 5003.62 1426.20   1
 -14  20  -4 4401.20 508.224   4
  -6 -14  -4 4364.61 516.315   6
  -6 -14  -4 4774.14 645.875   5
   6 -20  -4 5095.78 687.759   5
 -14  20  -4 5776.05 1350.04   2
 -20  14  -1 511.776 923.820   2
  14   6  -1 743.862 802.877   1
  20  -6  -1 10.5292 940.692   1
 -14  20  -1-478.943 733.904   2
  -6 -14   2 1754.17 595.021   7
   6 -20   2 1330.88 530.311   7
   6 -20   5 38534.9 2314.35   7
  -6 -14   5 35642.0 2124.05   7
 -20  14   5 34753.3 1634.23   3
 -14  20   5 35842.9 1580.76   3
 -20  15 -11 2134.87 421.020   6
 -15  20 -11 1213.37 368.219   6
  -5 -15  -8 6847.64 659.348   6
 -15  20  -8 5742.93 649.081   4
 -15  20  -8 7457.92 833.129   6
 -20  15  -8 6389.19 757.630   6
 -15  20  -5 13995.2 2067.10   2
  -5 -15  -5 15848.8 880.749   6
  20  -5  -5 13707.9 2118.79   1
 -20  15  -5 14900.8 1878.03   2
 -15  20  -5 15233.0 858.474   4
 -20  15  -5 13717.3 897.708   6
  15   5  -5 15030.9 2139.45   1
  -5 -15  -5 15607.2 1045.41   5
   5 -20  -5 13896.6 1051.46   5
 -15  20  -2 8413.65 1426.19   2
 -20  15  -2 11220.6 1541.52   2
  15   5  -2 9079.93 1472.95   1
  20  -5  -2 10282.3 1658.27   1
 -20  15   1 20351.9 1763.00   2
  -5 -15   1 19943.6 1469.67   7
   5 -20   1 21247.6 1469.46   7
  15   5   1 21466.3 1824.95   1
 -20  15   4 2069.54 577.464   3
  -5 -15   4 3197.51 741.798   7
   5 -20   4 2910.69 846.555   7
 -15  20   4 3004.26 615.850   3
 -15  20   7 8958.43 866.158   3
 -20  15   7 11009.8 1006.00   3
 -16  20  -9 3962.96 530.653   4
 -16  20  -9 4859.02 758.601   6
 -20  16  -9 4418.51 668.242   6
  -4 -16  -9 3461.27 495.034   6
 -16  20  -6 22557.7 2485.01   2
 -16  20  -6 18974.2 976.516   4
  20  -4  -6 17992.7 2425.91   1
  -4 -16  -6 19090.5 984.748   6
 -20  16  -6 17417.9 1068.37   6
 -20  16  -6 18801.9 2253.91   2
  16   4  -6 19421.2 2392.88   1
  -4 -16  -6 17903.1 1104.61   5
   4 -20  -6 20189.2 1239.58   5
 -20  16  -3 20092.9 1971.57   2
  16   4  -3 19431.6 2054.67   1
  20  -4  -3 20108.2 2262.68   1
 -16  20   0 50521.4 2780.72   2
 -20  16   0 53956.6 2985.51   2
  16   4   0 52730.0 2844.46   1
  20  -4   0 48747.0 2689.31   1
   4 -20   3 12947.1 1229.45   7
  -4 -16   3 14279.1 1295.75   7
   4 -20   6 9279.42 1288.29   7
  -4 -16   6 9873.79 1290.93   7
 -20  16   6 10881.3 945.601   3
 -16  20   6 9177.18 867.652   3
 -20  17 -10 1713.05 484.674   6
 -17  20 -10 1008.12 485.726   6
 -17  20  -7 30372.1 1267.31   4
  -3 -17  -7 33521.9 1309.56   6
 -20  17  -7 28556.4 1406.27   6
 -17  20  -7 31338.7 1504.78   6
  -3 -17  -7 33266.1 1421.00   5
   3 -20  -7 28739.8 1435.19   5
  17   3  -4 7992.95 1652.85   1
 -17  20  -4 6267.80 1326.76   2
 -20  17  -4 7410.08 1467.44   2
 -17  20  -4 8066.50 631.822   4
   3 -20  -4 7710.54 630.084   6
  -3 -17  -4 7981.28 622.144   6
  20  -3  -4 8674.97 1858.79   1
 -20  17  -4 6683.33 628.486   6
   3 -20  -4 8013.97 862.264   5
  -3 -17  -4 6118.22 731.427   5
 -17  20  -1 8765.32 1402.81   2
 -20  17  -1 8887.39 1402.47   2
  17   3  -1 8239.89 1393.08   1
  20  -3  -1 7196.28 1325.31   1
  -3 -17   2 9563.58 1087.48   7
   3 -20   2 10722.8 1148.30   7
   3 -20   5 21318.7 1775.67   7
  -3 -17   5 22333.5 1754.63   7
 -17  20   5 20802.8 1241.79   3
 -20  17   5 20421.6 1249.33   3
 -20  18 -11 263.867 324.096   6
 -18  20 -11-192.916 324.031   6
 -20  18  -8 1235.74 586.683   6
  -2 -18  -8 486.537 402.535   6
 -18  20  -8-292.245 569.701   6
 -18  20  -5 206.279 1078.94   2
 -20  18  -5 1780.87 1110.90   2
   2 -20  -5 655.540 390.540   6
  20  -2  -5 1376.10 1319.43   1
 -20  18  -5-555.096 525.442   6
  -2 -18  -5 458.436 552.079   5
   2 -20  -5 122.808 559.553   5
  -2 -18  -5 444.409 386.069   6
  18   2  -5 988.515 1106.41   1
  18   2  -2 6745.82 1398.69   1
 -18  20  -2 7986.37 1396.93   2
 -20  18  -2 9097.95 1469.35   2
  20  -2  -2 7420.78 1504.43   1
   2 -20   1 33663.2 1979.45   7
  -2 -18   1 30519.2 1911.57   7
  18   2   1 33869.2 2220.17   1
 -20  18   1 31838.2 2123.37   2
 -20  18   4 1724.70 597.281   3
   2 -20   4 3419.17 845.842   7
  -2 -18   4 1952.24 683.699   7
 -18  20   4 2515.69 616.001   3
 -18  20   7 31816.8 1533.65   3
 -20  18   7 32157.7 1575.67   3
 -19  20  -9 14183.4 974.306   6
 -20  19  -9 14149.8 943.991   6
  -1 -19  -6 6276.29 639.347   6
   1 -20  -6 6274.22 616.342   6
 -20  19  -6 6439.16 764.179   6
 -19  20  -6 5821.33 751.717   6
  -1 -19  -6 4835.65 740.579   5
   1 -20  -6 5874.12 770.698   5
 -19  20  -3 10624.3 1672.06   2
 -20  19  -3 8282.35 1376.65   2
  -1 -19  -3 10629.1 691.530   6
   1 -20  -3 10984.7 695.590   6
  20  -1  -3 8668.38 1654.55   1
  -1 -19  -3 9623.34 853.499   5
   1 -20  -3 8996.07 839.844   5
  19   1  -3 8978.58 1675.50   1
 -19  20   0 18150.6 1744.26   2
  20  -1   0 19587.2 1798.09   1
  19   1   0 21095.2 1873.41   1
 -20  19   0 21575.9 1876.93   2
 -20  19   3 6702.12 759.750   3
   1 -20   3 6951.99 1014.38   7
  -1 -19   3 6091.55 962.953   7
 -19  20   3 6250.66 764.607   3
 -19  20   6 4182.25 728.001   3
 -20  19   6 3538.17 718.189   3
 -20  20 -10 431.859 404.134   6
   0 -20  -7 91.0022 386.471   6
 -20  20  -7-81.5747 545.506   6
   0 -20  -7 226.391 513.287   5
 -20  20  -4 7178.74 1466.46   2
   0 -20  -4 8760.83 671.906   6
 -20  20  -4 6849.08 655.935   6
  20   0  -4 6669.01 1612.07   1
   0 -20  -4 6868.58 784.479   5
   0 -20  -1-392.773 350.559   6
  20   0  -1-224.843 755.370   1
 -20  20  -1 603.698 868.737   2
   0 -20   2 4373.01 848.499   7
 -20  20   2 5047.46 689.163   3
   0 -20   5-399.662 667.571   7
 -20  20   5 203.732 527.734   3
 -21   0  -9 63.9017 423.506   6
   0  21  -9-15.0168 369.512   6
   0  21  -9 51.6466 382.921   4
   0  21  -6 29998.4 1266.36   4
 -21   0  -6 30977.9 1373.48   6
   0  21  -3-570.582 730.373   1
 -21   0  -3 596.631 426.385   6
   0  21  -3 134.149 355.251   4
   0  21  -3 809.874 1224.33   2
 -21   0  -3 125.566 549.971   5
   0  21   0 5774.01 1147.30   1
 -21   0   0 5542.34 789.870   3
 -21   0   0 5461.24 724.194   5
 -21   0   3 216.865 583.967   3
 -21   0   6 6902.13 867.734   3
   1  20 -10 8703.46 606.326   4
  -1  21 -10 8644.61 624.646   4
 -21   1 -10 8520.59 592.715   6
 -20  -1 -10 9872.96 617.225   6
  20 -21  -7 8143.12 823.834   5
   1  20  -7 8351.85 750.582   4
  -1  21  -7 8887.55 770.734   4
 -21   1  -7 9566.33 864.550   6
 -20  -1  -7 8585.99 823.022   6
  21 -20  -7 9809.33 883.221   5
   1  20  -4 20851.3 2062.66   1
  -1  21  -4 20550.3 1953.63   1
   1  20  -4 20237.1 983.501   4
  -1  21  -4 20996.0 1029.16   4
 -21   1  -4 20379.9 1188.32   5
 -20  -1  -4 20503.2 1049.66   6
 -21   1  -4 19014.7 1000.69   6
 -20  -1  -4 20969.4 1216.01   5
   1  20  -4 12572.1 2543.44   2
  -1  21  -4 13482.4 2556.38   2
   1  20  -1 3834.98 1039.88   1
 -21   1  -1 4209.63 662.781   5
 -20  -1  -1 3383.76 643.988   5
  -1  21  -1 4708.41 1219.51   1
 -21   1   2 11566.4 1002.34   3
 -20  -1   2 10047.3 956.666   3
   1  20   2 10811.2 1496.71   1
 -21   1   5 5454.43 812.244   3
 -20  -1   5 5517.02 821.181   3
   2  19 -11 9289.21 496.935   4
  -2  21 -11 10683.5 552.981   4
 -21   2 -11 11292.0 520.563   6
 -19  -2 -11 11104.4 510.400   6
   2  19  -8 6425.19 674.828   4
  -2  21  -8 7513.48 754.141   4
 -19  -2  -8 6770.78 764.055   6
 -21   2  -8 6746.88 741.136   6
   2  19  -5 23364.3 1072.85   4
  -2  21  -5 24166.7 1151.61   4
 -19  -2  -5 21798.8 1143.17   6
 -21   2  -5 21886.3 1120.47   6
   2  19  -5 20642.2 2871.88   2
   2  19  -5 25442.8 2333.74   1
  -2  21  -2 470.655 756.335   1
 -21   2  -2 821.977 522.299   5
   2  19  -2 776.164 833.082   1
 -19  -2  -2 852.427 541.828   5
  -2  21  -2 2495.02 1339.03   2
   2  19   1 24948.5 2103.46   1
  -2  21   1 21598.2 1965.11   1
 -21   2   1 23074.8 1301.76   3
 -19  -2   1 23657.7 1270.75   5
 -21   2   4 9823.80 974.076   3
 -19  -2   4 9964.48 983.719   3
 -21   2   7 7595.83 797.842   3
   3  18  -9 5101.77 591.975   4
  -3  21  -9 4913.68 640.139   4
 -21   3  -9 5614.78 662.234   6
  -3  21  -9 3988.38 599.859   6
 -18  -3  -9 5714.63 647.271   6
  18 -21  -6 823.468 557.845   5
  -3  21  -6 1590.75 496.818   4
   3  18  -6 1022.34 438.011   4
 -18  -3  -6 1142.04 557.451   6
 -21   3  -6 1233.58 537.738   6
   3  18  -3 8870.33 652.829   4
  -3  21  -3 8404.52 636.071   4
 -18  -3  -3 7906.93 670.930   6
   3  18  -3 5646.73 1161.44   1
  -3  21  -3 6677.10 1639.55   2
  -3  21  -3 7391.51 1217.98   1
 -18  -3  -3 7288.02 754.102   5
   3  18   0 4219.16 1013.11   1
  -3  21   0 5815.05 1344.87   2
  -3  21   0 4776.97 1030.51   1
 -21   3   3 16767.9 1163.93   3
 -18  -3   3 15993.7 1184.79   3
 -18  -3   6 7820.14 870.241   3
 -21   3   6 9622.91 943.346   3
  -4  21 -10 294.657 407.804   4
   4  17 -10 193.497 359.642   4
 -17  -4 -10 992.283 403.690   6
 -21   4 -10 235.691 392.944   6
  -4  21 -10 787.316 403.409   6
  17 -21  -7 3348.63 688.949   5
   4  17  -7 3548.36 561.847   4
  -4  21  -7 2667.50 626.953   4
 -21   4  -7 3787.62 695.091   6
 -17  -4  -7 2626.06 643.273   6
   4  17  -4 11536.0 1577.74   1
   4  17  -4 11872.8 742.336   4
  -4  21  -4 12292.7 808.680   4
 -17  -4  -4 10383.3 810.643   6
 -21   4  -4 11289.1 785.995   6
 -17  -4  -4 9773.00 863.765   5
  -4  21  -4 13309.7 2101.78   2
  -4  21  -4 11669.3 1449.89   1
  -4  21  -1-70.1984 750.187   1
   4  17  -1-591.789 784.036   1
  -4  21  -1 1238.46 1114.47   2
   4  17   2 11874.9 1501.02   1
 -17  -4   5 14339.8 1121.98   3
 -21   4   5 13384.0 1041.60   3
   5  16 -11 5047.85 416.163   4
  -5  21 -11 5805.89 477.939   4
 -16  -5 -11 6646.28 438.674   6
 -21   5 -11 6243.73 457.144   6
   5  16  -8-101.563 443.245   4
  -5  21  -8 538.171 538.678   4
 -16  -5  -8 537.657 544.039   6
 -21   5  -8 1906.90 638.574   6
  16 -21  -5 5885.79 759.544   5
   5  16  -5 6389.45 1369.66   1
 -16  -5  -5 6684.39 709.100   6
   5  16  -5 5819.04 591.216   4
 -21   5  -5 6750.82 709.161   6
 -21   5  -5 5782.31 1521.36   2
  -5  21  -5 7435.36 696.703   4
 -16  -5  -5 6447.89 715.864   5
  -5  21  -5 6343.69 1712.88   2
  -5  21  -2 2537.76 915.187   1
   5  16  -2 1504.17 915.878   1
  -5  21  -2 2015.55 1244.85   2
   5  16   1 23052.0 1886.64   1
 -21   5   4 7358.54 837.959   3
 -16  -5   4 8504.22 913.606   3
 -21   5   7 3297.23 688.926   3
  -6  21  -9 3212.46 615.264   4
   6  15  -9 3122.56 534.730   4
 -15  -6  -9 3113.05 586.054   6
 -21   6  -9 3483.13 612.108   6
  -6  21  -9 2922.34 591.886   6
  15 -21  -6-538.731 596.058   5
  -6  21  -6-42.6791 459.451   4
   6  15  -6 56.3691 419.328   4
 -15  -6  -6 239.240 510.342   6
 -21   6  -6 14.3875 492.144   6
   6  15  -6-1087.53 1347.21   2
 -21   6  -6 2263.91 1250.31   2
  -6  21  -6 624.984 1125.33   2
   6  15  -6 716.380 1025.38   1
  -6  21  -3 5445.44 1068.67   1
 -21   6  -3 3402.14 1204.49   2
  -6  21  -3 4296.79 514.427   4
  -6  21  -3 5846.41 1512.45   2
   6  15  -3 4689.49 1156.15   1
  -6  21   0 2263.27 858.369   1
   6  15   0 2398.49 888.854   1
  -6  21   0 1950.61 957.471   2
   6  15   3 38697.8 2375.63   1
 -21   6   3 41891.7 1722.79   3
 -21   6   6 1192.11 563.987   3
  15 -21   6 1655.36 872.971   7
   7  14 -10 2209.16 439.087   4
  -7  21 -10 927.902 418.130   4
 -14  -7 -10 2670.07 469.891   6
 -21   7 -10 1452.37 437.776   6
  -7  21 -10 1486.28 473.542   6
   7  14  -7 17212.4 1007.74   4
  -7  21  -7 16773.8 1037.60   4
 -14  -7  -7 16728.4 1079.90   6
 -21   7  -7 18889.0 1112.14   6
  14 -21  -7 14858.3 1041.90   5
  14 -21  -4 2325.96 613.275   5
 -21   7  -4 595.244 1055.90   2
 -14  -7  -4 1446.91 469.554   6
  -7  21  -4 2021.69 459.084   4
 -21   7  -4 966.672 457.254   6
   7  14  -4 2143.40 891.423   1
  -7  21  -4 1285.57 742.461   1
 -14  -7  -4 1346.13 531.187   5
  -7  21  -4 585.236 1114.05   2
  -7  21  -1 50874.4 2694.38   1
 -21   7  -1 44915.8 3119.23   2
   7  14  -1 53809.7 2933.87   1
  -7  21  -1 59262.5 3450.02   2
   7  14   2 15781.4 1519.88   1
  14 -21   2 16811.2 1119.08   7
 -21   7   5 1800.87 580.054   3
  14 -21   5 2689.40 808.746   7
 -14  -7   5 2378.30 657.797   3
   8  13 -11 1929.55 334.845   4
  -8  21 -11 2817.04 410.026   4
  -8  21 -11 1441.28 327.986   6
 -13  -8 -11 2981.02 353.890   6
 -21   8 -11 2956.76 393.097   6
 -13  -8  -8 3260.14 640.984   6
   8  13  -8 2772.91 551.237   4
  -8  21  -8 4289.62 671.351   4
 -21   8  -8 4389.62 710.161   6
  13 -21  -5 7746.89 792.659   5
  -8  21  -5 8857.38 720.644   4
 -21   8  -5 6596.31 1539.62   2
 -13  -8  -5 7803.09 744.449   6
 -21   8  -5 7347.18 694.874   6
  -8  21  -5 8809.97 1715.36   2
   8  13  -5 10762.0 1648.21   1
 -13  -8  -5 7010.57 722.318   5
 -21   8  -2 9703.77 1617.60   2
  -8  21  -2 12344.4 1326.78   1
   8  13  -2 10737.1 1461.26   1
  -8  21  -2 14724.7 1960.75   2
  13 -21   1 5752.54 706.485   7
   8  13   1 6162.81 1168.56   1
 -21   8   4 8173.36 854.406   3
  13 -21   4 7277.25 991.375   7
  -8  21   4 7713.39 848.399   3
 -21   8   7 8585.76 879.095   3
  -9  21  -9 2118.20 616.009   6
   9  12  -9 1617.44 487.919   4
  -9  21  -9 1436.67 492.151   4
 -21   9  -9 2044.07 593.752   6
 -12  -9  -9 2729.67 564.394   6
 -21   9  -6 1331.25 562.482   6
 -21   9  -6 2812.46 1365.53   2
   9  12  -6 1203.07 459.991   4
 -12  -9  -6 1848.31 598.632   6
   9  12  -6 3475.21 1238.07   1
  -9  21  -6 2108.35 529.354   4
  -9  21  -6 1408.73 1170.58   2
  12 -21  -6 1279.41 564.312   5
 -21   9  -3 4761.88 1219.65   2
  -9  21  -3 5949.24 984.494   1
   9  12  -3 5714.03 1216.21   1
  -9  21  -3 5177.80 1404.97   2
  -9  21   0 52751.6 2906.24   2
   9  12   0 54263.1 2839.62   1
 -21   9   0 48911.0 3220.11   2
   9  12   3 10348.1 1220.27   1
  12 -21   3 10987.1 1068.79   7
 -12  -9   3 9966.04 1003.46   7
 -21   9   6 2513.14 633.100   3
  12 -21   6 2524.40 818.520   7
  -9  21   6 3266.29 697.037   3
  10  11 -10 501.971 368.266   4
 -11 -10 -10 1278.42 391.946   6
 -10  21 -10 839.557 484.056   6
 -10  21 -10 583.674 399.361   4
  10  11  -7 20761.2 1112.44   4
 -10  21  -7 18756.3 1056.26   4
 -11 -10  -7 19101.8 1114.82   6
 -21  10  -7 19574.7 1116.66   6
  11 -21  -7 19474.6 1206.87   5
 -10  21  -4 13385.0 799.210   4
 -21  10  -4 13553.4 1744.64   2
 -11 -10  -4 12899.3 807.201   6
  11 -21  -4 12072.0 947.606   5
 -10  21  -4 14342.4 2034.42   2
 -11 -10  -4 12737.7 896.633   5
  10  11  -4 11678.0 1661.36   1
  10  11  -1 3869.37 1048.07   1
 -21  10  -1 3377.47 1094.31   2
 -10  21  -1 1914.55 988.926   2
  10  11   2 14828.7 1473.45   1
  11 -21   2 14822.6 1115.42   7
  11 -21   5 33568.0 2118.27   7
 -11 -10   5 31402.3 1869.57   7
 -21  10   5 34707.2 1591.04   3
 -10  21   5 34788.5 1604.77   3
  11  10 -11 2179.58 327.145   4
 -11  21 -11 2712.71 389.970   4
 -21  11 -11 2984.25 399.720   6
 -11  21 -11 2295.82 386.200   6
 -10 -11 -11 3230.87 329.383   6
 -11  21  -8 1029.16 478.997   4
 -10 -11  -8 1237.42 511.237   6
 -21  11  -8 1015.77 567.057   6
  11  10  -8 992.262 451.516   4
  21 -10  -5 29647.8 2945.37   1
 -11  21  -5 33490.0 1335.81   4
 -21  11  -5 30001.9 1281.35   6
 -10 -11  -5 32614.4 1443.44   5
 -11  21  -5 33748.0 2988.33   2
 -21  11  -5 29256.9 2597.76   2
  11  10  -5 32446.0 2754.93   1
  10 -21  -5 30906.6 1540.88   5
 -10 -11  -5 33008.6 1330.45   6
 -21  11  -2 14943.5 1755.35   2
  11  10  -2 15911.2 1714.38   1
 -11  21  -2 16479.5 1902.50   2
  11  10   1 2324.88 779.576   1
 -21  11   1 2775.22 1107.06   2
  10 -21   1 2527.34 557.960   7
  10 -21   4 12604.8 1271.93   7
 -21  11   4 14138.9 1029.67   3
 -10 -11   4 12630.8 1162.19   7
 -11  21   4 13856.7 1027.39   3
 -21  11   7 22224.1 1281.22   3
  -9 -12  -9 8428.03 695.736   6
  12   9  -9 8177.17 698.985   4
 -12  21  -9 7387.06 688.458   4
 -12  21  -9 8495.49 867.623   6
 -21  12  -9 8635.79 771.552   6
  12   9  -6 3624.39 1271.46   1
 -21  12  -6 3052.69 1326.21   2
  -9 -12  -6 2294.99 594.109   6
  21  -9  -6 1454.25 1223.53   1
 -21  12  -6 2222.88 551.288   6
  -9 -12  -6 2202.68 539.082   5
 -12  21  -6 2841.03 529.283   4
   9 -21  -6 3427.68 720.632   5
 -12  21  -6 3718.17 1418.22   2
 -21  12  -3 11125.7 1611.05   2
  12   9  -3 8681.92 1465.46   1
 -12  21  -3 10253.7 1552.35   2
  21  -9   0 51826.3 2867.41   1
 -12  21   0 51511.7 2754.16   2
  12   9   0 53762.9 2892.66   1
 -21  12   0 58189.2 3205.72   2
   9 -21   3 5648.90 847.207   7
  -9 -12   3 4350.97 750.844   7
 -21  12   6 1854.78 625.915   3
   9 -21   6 2243.52 822.297   7
  -9 -12   6 1823.30 734.524   7
 -12  21   6 1816.38 580.926   3
  13   8 -10 3872.48 492.279   4
 -13  21 -10 3866.40 507.651   4
 -13  21 -10 5585.47 666.315   6
  -8 -13 -10 4423.73 469.081   6
 -13  21  -7 7223.89 704.095   4
 -21  13  -7 6828.73 726.776   6
  -8 -13  -7 7672.01 745.372   6
   8 -21  -7 6084.21 771.513   5
  21  -8  -4 5465.61 1579.78   1
 -21  13  -4 4290.48 1108.55   2
  13   8  -4 5691.85 1388.21   1
  -8 -13  -4 6317.48 609.838   6
 -13  21  -4 6278.62 585.196   4
  -8 -13  -4 6594.06 734.759   5
 -13  21  -4 7730.42 1601.83   2
   8 -21  -4 6731.38 819.891   5
 -21  13  -1 5711.04 1248.26   2
  21  -8  -1 5405.07 1310.79   1
  13   8  -1 5290.64 1132.81   1
 -13  21  -1 6379.58 1208.10   2
   8 -21   2 12039.7 1105.72   7
  -8 -13   2 10624.0 1105.26   7
  13   8   2 12099.9 1361.72   1
 -21  13   5 8389.97 865.957   3
   8 -21   5 8432.14 1137.96   7
  -8 -13   5 8860.74 1114.22   7
 -13  21   5 6636.36 801.620   3
 -21  14 -11 5190.48 469.360   6
 -14  21 -11 2831.73 429.873   6
 -14  21  -8 2152.07 501.990   4
  -7 -14  -8 2960.07 577.658   6
 -21  14  -8 1926.70 585.381   6
 -14  21  -8 2649.05 695.911   6
 -21  14  -5 2522.75 1130.87   2
  14   7  -5 1561.21 1208.78   1
  -7 -14  -5 2667.06 507.752   6
  21  -7  -5 3022.73 1694.51   1
 -21  14  -5 2705.71 547.384   6
  -7 -14  -5 2209.91 561.675   5
   7 -21  -5 1897.01 700.069   5
 -14  21  -5 2317.33 480.585   4
 -14  21  -5 3518.24 1392.76   2
 -21  14  -2 15614.8 1781.15   2
  21  -7  -2 15229.1 1965.82   1
  14   7  -2 17276.0 1793.05   1
 -14  21  -2 13813.0 1683.87   2
   7 -21   1 53552.3 2340.87   7
 -21  14   1 50764.9 3029.51   2
  14   7   1 57394.6 2939.34   1
 -21  14   4 1535.68 588.010   3
   7 -21   4 1124.99 688.964   7
  -7 -14   4 2027.90 705.184   7
 -14  21   4 1822.52 570.218   3
 -14  21   7 18529.5 1140.21   3
 -21  14   7 18977.0 1188.86   3
 -15  21  -9 2834.58 487.795   4
 -21  15  -9 2421.28 544.946   6
  -6 -15  -9 3277.18 593.535   6
 -15  21  -6 1398.05 437.639   4
 -21  15  -6 1231.14 517.580   6
  -6 -15  -6 2130.26 536.993   6
  -6 -15  -6 2211.68 575.007   5
   6 -21  -6 1095.58 626.563   5
  21  -6  -3 39295.6 3123.38   1
  -6 -15  -3 40852.5 1367.98   6
 -15  21  -3 33759.0 2762.35   2
  -6 -15  -3 38668.5 1528.80   5
   6 -21  -3 41831.1 1636.07   5
  15   6  -3 40699.2 2866.24   1
 -15  21   0 1480.72 764.559   2
 -21  15   0 1093.25 805.652   2
  15   6   0 2706.39 943.832   1
  21  -6   0 2598.80 854.346   1
 -21  15   3 4275.99 648.926   3
   6 -21   3 3411.02 734.280   7
  -6 -15   3 3879.41 743.555   7
 -15  21   3 3710.28 633.999   3
 -21  15   6 537.025 574.637   3
  -6 -15   6 1745.00 759.606   7
 -15  21   6 617.550 491.681   3
 -21  16 -10 5216.19 570.226   6
 -16  21 -10 4517.35 608.959   6
 -16  21  -7 2271.31 483.977   4
  -5 -16  -7 3431.73 565.833   6
 -16  21  -7 3145.57 733.915   6
  -5 -16  -7 2194.34 551.664   5
 -21  16  -7 3240.19 664.003   6
   5 -21  -7 2211.65 581.604   5
 -16  21  -4 6710.33 1633.25   2
  16   5  -4 8550.91 1728.10   1
 -21  16  -4 7180.92 1345.28   2
 -16  21  -4 9086.19 675.900   4
 -21  16  -4 8666.96 698.503   6
  -5 -16  -4 8339.07 780.506   5
   5 -21  -4 7778.96 887.647   5
  -5 -16  -4 9176.61 677.959   6
  21  -5  -4 9195.65 1847.20   1
  21  -5  -1 24272.8 2148.60   1
 -16  21  -1 24688.4 2084.07   2
 -21  16  -1 28480.4 2328.99   2
  16   5  -1 26424.7 2157.58   1
   5 -21   2 1126.34 590.753   7
  -5 -16   2 2201.90 731.010   7
 -21  16   5 6148.54 800.961   3
   5 -21   5 8414.09 1168.48   7
  -5 -16   5 6512.08 1009.77   7
 -16  21   5 5327.88 723.672   3
 -21  17 -11 586.681 314.463   6
 -17  21 -11-264.649 314.653   6
 -17  21  -8 1152.39 616.137   6
 -21  17  -8 2228.17 562.244   6
 -17  21  -8 2337.52 496.499   4
  -4 -17  -8 2296.11 508.241   6
 -17  21  -5 12577.3 2092.50   2
  17   4  -5 15154.5 2196.28   1
 -21  17  -5 12583.6 1862.37   2
 -17  21  -5 15323.4 860.080   4
  -4 -17  -5 13735.1 1016.79   5
 -21  17  -5 12887.0 919.721   6
   4 -21  -5 14110.9 1061.41   5
  21  -4  -5 11448.0 2056.18   1
  -4 -17  -5 13055.5 836.680   6
 -17  21  -2 10622.4 1560.88   2
 -21  17  -2 13699.7 1699.26   2
  17   4  -2 13860.4 1760.42   1
  21  -4  -2 12466.7 1898.06   1
 -21  17   1 983.156 689.380   2
   4 -21   1 471.554 541.510   7
  17   4   1 134.723 678.598   1
   4 -21   4 11933.6 1262.78   7
  -4 -17   4 11420.9 1267.51   7
 -17  21   4 11987.4 971.907   3
 -21  17   4 12205.5 976.466   3
 -17  21   7 3132.32 629.842   3
 -21  17   7 3579.50 702.315   3
  -3 -18  -9 62.8289 319.232   6
 -18  21  -9 1051.90 552.167   6
 -21  18  -9 43.3813 522.068   6
 -18  21  -6 8310.59 658.644   4
  -3 -18  -6 8574.29 721.734   6
  -3 -18  -6 8247.80 848.061   5
 -21  18  -6 8108.64 797.447   6
 -18  21  -6 7502.81 819.804   6
   3 -21  -6 7810.89 857.486   5
  -3 -18  -3 16898.7 847.939   6
 -18  21  -3 16613.7 1913.32   2
 -18  21  -3 17662.5 877.077   4
  18   3  -3 14773.5 1942.52   1
 -21  18  -3 17136.5 1965.68   2
  -3 -18  -3 15518.1 990.308   5
  21  -3  -3 16408.5 2107.42   1
   3 -21  -3 16231.9 1068.33   5
   3 -21  -3 17022.2 856.390   6
 -18  21   0 4654.93 1032.99   2
 -21  18   0 4980.68 1059.02   2
  18   3   0 5365.78 1120.39   1
  21  -3   0 3100.16 935.874   1
 -21  18   3 6837.41 794.682   3
   3 -21   3 6704.91 981.946   7
  -3 -18   3 7744.25 1050.47   7
 -18  21   3 8285.17 859.228   3
 -18  21   6 774.074 548.821   3
 -21  18   6 1400.67 632.608   3
 -21  19 -10 683.068 406.008   6
 -19  21 -10-91.7229 440.884   6
 -21  19  -7 6042.01 760.509   6
 -19  21  -7 6064.34 763.947   6
  -2 -19  -7 5438.52 620.409   6
  -2 -19  -7 6234.38 724.608   5
   2 -21  -7 4966.52 691.916   5
  19   2  -4 9363.05 1871.98   1
 -19  21  -4 8600.39 1578.62   2
 -21  19  -4 10344.3 1657.28   2
  21  -2  -4 9761.22 1898.74   1
   2 -21  -4 9146.11 688.775   6
 -21  19  -4 6934.57 659.802   6
  -2 -19  -4 7922.57 661.926   6
  -2 -19  -4 7192.81 810.869   5
   2 -21  -4 8327.76 883.839   5
  21  -2  -1 22917.0 2145.23   1
  -2 -19  -1 24660.7 1013.01   6
 -19  21  -1 24464.4 2112.60   2
  19   2  -1 24334.6 2122.83   1
 -21  19  -1 23864.9 2221.48   2
  -2 -19  -1 24747.2 1265.62   5
   2 -21  -1 26534.1 1278.58   5
 -21  19   2 832.135 512.941   3
   2 -21   2 1209.16 659.917   7
  -2 -19   2 320.363 579.868   7
 -19  21   2 1233.74 579.560   3
   2 -21   5 24834.3 1926.08   7
  -2 -19   5 28525.9 2076.10   7
 -19  21   5 23835.0 1369.83   3
 -21  19   5 24027.8 1344.60   3
 -21  20 -11 2191.03 321.684   6
 -20  21 -11 2612.04 339.163   6
  -1 -20  -8 3098.81 484.289   6
 -20  21  -8 4382.71 701.576   6
 -21  20  -8 4331.56 692.891   6
  20   1  -5 5290.49 1584.65   1
 -20  21  -5 7403.74 1650.11   2
   1 -21  -5 5267.70 583.226   6
 -21  20  -5 3974.19 1342.96   2
 -21  20  -5 5513.30 690.783   6
 -20  21  -5 4751.29 683.774   6
  -1 -20  -5 5540.03 597.142   6
  -1 -20  -5 4026.35 724.015   5
   1 -21  -5 5744.28 788.518   5
  21  -1  -5 7772.47 1800.25   1
  20   1  -2 10846.1 1700.77   1
 -20  21  -2 9653.56 1536.54   2
 -21  20  -2 9848.83 1613.31   2
  -1 -20  -2 11693.3 898.195   5
  -1 -20  -2 11653.3 712.397   6
   1 -21  -2 10961.8 924.445   5
   1 -21  -2 12221.3 728.488   6
  21  -1  -2 12248.3 1783.52   1
 -21  20   1 4454.17 682.115   3
 -20  21   1 4404.88 683.213   3
   1 -21   4 22310.7 1761.11   7
  -1 -20   4 22331.8 1784.80   7
 -20  21   4 20705.3 1281.33   3
 -21  20   4 20414.6 1259.69   3
 -20  21   7 8983.63 874.638   3
 -21  20   7 8929.46 864.567   3
 -21  21  -9-799.805 535.349   6
   0 -21  -6 4561.37 555.140   6
 -21  21  -6 5849.47 740.890   6
   0 -21  -6 4780.30 707.924   5
 -21  21  -3 532.214 1014.96   2
   0 -21  -3-478.303 399.799   6
   0 -21  -3 480.464 532.866   5
  21   0  -3-434.728 1133.09   1
 -21  21   0 7011.67 1281.47   2
  21   0   0 6339.50 1223.22   1
   0 -21   0 6076.01 748.028   5
 -21  21   0 5955.76 737.590   3
   0 -21   3 375.849 620.531   7
 -21  21   3-457.290 542.111   3
 -21  21   6 31572.8 1554.62   3
   0  22 -10 6987.31 491.792   4
 -22   0 -10 7105.80 505.417   6
  22 -22  -7-619.979 561.662   5
   0  22  -7 285.525 427.147   4
 -22   0  -7 259.726 486.276   6
   0  22  -4 1124.81 402.444   4
   0  22  -4 1507.48 957.127   1
 -22   0  -4 733.117 461.573   6
 -22   0  -4 819.276 549.109   5
   0  22  -4 1419.70 1589.68   2
 -22   0  -1-645.754 588.821   3
   0  22  -1 326.868 871.359   1
 -22   0  -1-448.758 562.070   5
 -22   0   2 6201.53 848.859   3
 -22   0   5 49.0335 549.887   3
  -1  22  -8 4696.45 621.274   4
 -21  -1  -8 4783.81 651.891   6
 -22   1  -8 4411.01 630.012   6
   1  21  -8 4282.83 578.560   4
  21 -22  -8 4846.07 631.558   5
   1  21  -5 2107.03 482.551   4
 -21  -1  -5 2074.23 539.302   6
 -22   1  -5 2408.53 551.816   6
  -1  22  -5 2153.21 483.184   4
   1  21  -2 23033.4 2053.77   1
  -1  22  -2 24604.9 2100.02   1
   1  21  -2 21449.8 964.987   4
  -1  22  -2 22423.8 996.649   4
  -1  22  -2 22188.9 2727.29   2
 -22   1  -2 20866.7 1246.52   5
 -21  -1  -2 23486.6 1321.37   5
 -22   1  -2 22030.6 1304.09   3
 -21  -1  -2 21198.7 1315.29   3
   1  21   1 23305.3 2182.99   1
  -1  22   1 25724.6 2159.58   1
 -21  -1   1 25420.4 1366.64   5
 -22   1   1 25488.5 1406.98   3
 -21  -1   1 25915.2 1430.78   3
 -22   1   4 9405.32 994.949   3
 -21  -1   4 9236.92 1019.42   3
 -22   1   7 8211.54 824.170   3
 -21  -1   7 8197.23 830.580   3
   2  20  -9 8136.30 655.670   4
  -2  22  -9 9045.74 707.022   4
 -22   2  -9 9146.20 708.605   6
  -2  22  -9 7841.54 689.405   6
 -20  -2  -9 9047.70 697.424   6
  20 -22  -6 364.032 581.420   5
   2  20  -6 2078.96 494.076   4
 -20  -2  -6 716.244 513.230   6
 -22   2  -6 1764.54 541.717   6
  -2  22  -6 1185.87 480.898   4
   2  20  -3 31001.5 2407.25   1
  -2  22  -3 30479.1 2326.76   1
   2  20  -3 32455.2 1225.13   4
  -2  22  -3 32155.6 1225.96   4
 -20  -2  -3 30263.0 1268.14   6
  -2  22  -3 31327.6 3115.91   2
 -20  -2  -3 32110.9 1527.94   5
   2  20   0 16794.3 1722.71   1
  -2  22   0 15720.9 1721.55   1
 -20  -2   0 18739.3 1171.76   5
 -22   2   0 17975.8 1219.57   3
 -22   2   3 29533.6 1567.36   3
 -20  -2   3 32532.9 1603.60   3
 -22   2   6 3315.87 695.538   3
 -20  -2   6 2437.87 662.051   3
 -19  -3 -10 3068.30 430.418   6
   3  19 -10 3066.13 416.491   4
 -22   3 -10 3109.70 437.559   6
  -3  22 -10 3422.73 482.260   4
  -3  22 -10 3232.12 424.672   6
   3  19  -7 47045.8 1668.90   4
  -3  22  -7 50507.5 1767.39   4
 -19  -3  -7 47719.9 1806.16   6
 -22   3  -7 47709.2 1741.81   6
  22 -19  -7 47833.5 1827.28   5
  19 -22  -7 51715.3 1896.57   5
 -19  -3  -4 5898.02 660.130   6
  -3  22  -4 5962.80 622.786   4
  -3  22  -4 5903.19 1176.45   1
 -22   3  -4 6197.39 639.924   6
   3  19  -4 5253.52 1276.33   1
  -3  22  -4 7498.76 1803.74   2
 -19  -3  -4 5041.17 699.143   5
   3  19  -4 5384.73 551.127   4
   3  19  -1 25199.7 2083.95   1
  -3  22  -1 25603.8 2083.56   1
  -3  22  -1 21398.0 2492.61   2
 -19  -3  -1 22802.9 1259.51   5
 -22   3  -1 22829.8 1290.50   3
 -22   3   2 1125.90 601.149   3
   3  19   2 1417.18 906.266   1
 -19  -3   2 357.910 525.900   5
 -22   3   5 40268.4 1815.83   3
 -19  -3   5 42828.4 1886.90   3
  -4  22 -11 645.303 267.570   4
 -22   4 -11 1297.34 265.092   6
 -18  -4 -11 1084.44 255.869   6
   4  18  -8 978.254 441.110   4
  -4  22  -8 1167.08 533.946   4
 -18  -4  -8 1295.16 564.576   6
 -22   4  -8 736.551 508.938   6
  18 -22  -8 1317.65 533.370   5
   4  18  -5 16508.4 915.707   4
  -4  22  -5 16267.2 961.474   4
 -22   4  -5 15344.7 934.291   6
 -18  -4  -5 15341.9 965.279   6
 -18  -4  -5 16915.7 1085.44   5
  18 -22  -5 16656.6 1129.48   5
  -4  22  -5 14329.3 2476.62   2
   4  18  -5 17806.3 2029.04   1
  -4  22  -2 16163.8 1703.70   1
  -4  22  -2 19157.4 2321.50   2
 -18  -4  -2 14643.3 1019.69   5
   4  18  -2 18033.5 1845.46   1
   4  18   1 12072.4 1530.78   1
 -18  -4   1 11840.5 929.682   5
 -22   4   1 11533.8 996.650   3
 -22   4   4 5164.15 790.576   3
 -18  -4   4 5357.11 817.120   3
 -22   4   7-205.665 531.253   3
  -5  22  -9 4327.96 664.747   6
  -5  22  -9 3517.48 594.230   4
 -22   5  -9 3965.41 582.318   6
   5  17  -9 4004.76 548.366   4
 -17  -5  -9 4907.97 623.016   6
   5  17  -6 12761.0 844.137   4
  -5  22  -6 11343.4 869.159   4
 -17  -5  -6 12471.4 945.419   6
 -22   5  -6 13505.0 940.382   6
  17 -22  -6 11636.3 976.264   5
  -5  22  -3 792.302 734.963   1
   5  17  -3 1155.91 938.215   1
 -17  -5  -3 1413.34 443.175   6
  -5  22  -3 1904.52 452.594   4
  -5  22  -3 1538.23 1332.95   2
 -17  -5  -3 1678.39 549.456   5
  -5  22   0 3456.80 992.534   1
   5  17   0 3801.89 1013.77   1
  -5  22   0 3964.02 1078.72   2
   5  17   3 3547.79 986.082   1
 -22   5   3 4166.33 767.312   3
 -17  -5   3 2889.08 624.955   5
 -22   5   6 18412.9 1227.14   3
 -17  -5   6 20468.8 1277.57   3
   6  16 -10 3773.81 456.106   4
 -16  -6 -10 3422.00 464.380   6
  -6  22 -10 3309.04 471.296   4
 -22   6 -10 2547.88 465.550   6
  -6  22 -10 2998.48 478.459   6
   6  16  -7 4890.48 596.603   4
 -16  -6  -7 4374.55 723.932   6
 -22   6  -7 5784.59 737.676   6
  -6  22  -7 4188.28 642.367   4
  16 -22  -7 5803.20 755.753   5
   6  16  -4 1122.11 967.564   1
  16 -22  -4 43.4687 544.781   5
 -22   6  -4 621.035 474.712   6
 -16  -6  -4 279.634 468.594   6
  -6  22  -4 899.492 450.014   4
 -16  -6  -4 124.861 509.954   5
  -6  22  -4 725.330 1227.37   2
 -22   6  -4 1699.56 1214.13   2
  -6  22  -4 1222.78 756.810   1
   6  16  -1 7081.29 1208.04   1
  -6  22  -1 7243.77 1154.19   1
  -6  22  -1 9610.97 1599.64   2
 -22   6   2 10524.4 928.680   3
   6  16   2 9936.91 1323.51   1
 -22   6   5 7503.56 874.218   3
 -16  -6   5 7611.36 882.199   3
 -22   7 -11 4351.70 388.459   6
  -7  22 -11 3653.85 394.769   4
 -15  -7 -11 3940.84 354.444   6
   7  15  -8 5901.66 649.034   4
 -22   7  -8 7767.52 794.989   6
  -7  22  -8 6287.98 719.900   4
 -15  -7  -8 6410.44 747.891   6
  15 -22  -8 7792.04 783.984   5
  15 -22  -5 8774.33 848.757   5
   7  15  -5 8902.35 695.287   4
  -7  22  -5 9242.61 760.982   4
 -15  -7  -5 8208.17 810.078   6
 -22   7  -5 7136.23 1568.01   2
 -22   7  -5 8284.16 743.730   6
 -15  -7  -5 8730.02 816.253   5
  -7  22  -5 9161.42 1872.18   2
   7  15  -5 8724.29 1501.32   1
  -7  22  -2 27860.0 2016.23   1
 -15  -7  -2 26744.7 1312.12   5
 -22   7  -2 23480.3 2467.18   2
   7  15  -2 28202.9 2263.73   1
   7  15   1 22721.1 1878.47   1
 -22   7   4 9397.85 919.448   3
 -22   7   7 14117.1 1054.75   3
   8  14  -9 2618.72 480.756   4
  -8  22  -9 2675.66 563.445   4
 -14  -8  -9 3436.42 569.557   6
 -22   8  -9 4262.15 616.157   6
  -8  22  -9 1500.48 547.692   6
   8  14  -6 18174.1 996.681   4
  -8  22  -6 17432.9 1019.74   4
 -14  -8  -6 18518.4 1100.38   6
 -22   8  -6 17484.4 1054.23   6
  14 -22  -6 17797.0 1166.60   5
  -8  22  -3 36676.5 1352.98   4
  -8  22  -3 34207.5 2232.48   1
 -14  -8  -3 36049.7 1358.80   6
 -14  -8  -3 33499.1 1471.54   5
 -22   8  -3 32694.9 2730.82   2
  14 -22  -3 36489.8 1580.63   5
   8  14  -3 34832.0 2582.18   1
  -8  22  -3 36215.8 3057.05   2
   8  14   0 6301.57 1183.26   1
  -8  22   0 7070.33 1260.57   2
   8  14   3 24450.5 1913.84   1
  14 -22   3 25303.4 1546.64   7
  -8  22   3 27699.0 1425.34   3
 -22   8   3 24600.2 1330.01   3
 -22   8   6 19771.5 1252.17   3
   9  13 -10 263.529 332.583   4
  -9  22 -10 72.9246 386.861   4
 -13  -9 -10 567.777 361.822   6
 -22   9 -10-509.465 443.446   6
  -9  22 -10 545.148 420.594   6
   9  13  -7 13852.0 892.500   4
  -9  22  -7 13079.0 930.009   4
 -13  -9  -7 13250.8 975.454   6
 -22   9  -7 12394.0 926.393   6
  13 -22  -7 12260.9 997.995   5
  -9  22  -4 29962.3 1248.44   4
 -22   9  -4 27267.3 1193.19   6
 -13  -9  -4 29581.2 1384.90   5
  -9  22  -4 28807.2 2782.66   2
 -22   9  -4 25473.1 2475.25   2
 -13  -9  -4 27075.0 1242.12   6
  13 -22  -4 30901.8 1456.98   5
   9  13  -4 29782.1 2487.13   1
 -22   9  -1 2955.44 1180.41   2
  -9  22  -1 3824.99 1151.96   2
   9  13  -1 3449.22 998.622   1
   9  13   2 3579.43 922.755   1
  13 -22   2 5454.50 730.734   7
 -22   9   5 2961.79 673.890   3
  13 -22   5 2821.91 862.853   7
 -13  -9   5 2763.44 653.000   3
  -9  22   5 2681.73 689.873   3
 -10  22 -11 667.312 284.872   4
 -12 -10 -11 847.950 246.684   6
 -22  10 -11 442.830 291.627   6
 -10  22 -11 150.317 290.684   6
 -12 -10  -8 3943.10 662.137   6
 -10  22  -8 3218.94 593.578   4
 -22  10  -8 3709.25 650.262   6
  10  12  -8 2753.31 535.822   4
  12 -22  -8 3376.01 599.953   5
 -10  22  -5 17812.0 1001.91   4
 -22  10  -5 16251.7 2060.94   2
  10  12  -5 17930.8 2055.01   1
 -12 -10  -5 17736.4 1017.72   6
 -22  10  -5 16193.1 949.104   6
 -10  22  -5 20731.3 2450.60   2
 -12 -10  -5 17953.7 1114.00   5
  12 -22  -5 17625.3 1153.11   5
 -22  10  -2 1388.60 1103.16   2
  10  12  -2 1421.81 928.545   1
 -10  22  -2 1088.64 999.145   2
  12 -22   1 6439.59 797.898   7
  10  12   1 6088.69 1089.04   1
  12 -22   4 14919.7 1338.52   7
 -12 -10   4 13701.3 1215.02   7
 -10  22   4 15536.1 1106.36   3
 -22  10   4 14593.1 1078.43   3
 -22  10   7 6407.92 777.057   3
  11  11  -9 17348.0 932.453   4
 -11  22  -9 15938.3 941.149   4
 -22  11  -9 18185.3 1004.39   6
 -11  22  -9 18635.7 1125.73   6
 -11 -11  -9 17788.1 926.931   6
 -11  22  -6 1295.44 448.440   4
 -11 -11  -6 2050.58 558.682   6
 -22  11  -6 1076.64 489.581   6
 -11 -11  -6 658.985 471.840   5
  11 -22  -6 2538.12 661.699   5
  11 -22  -3 3350.15 644.210   5
 -22  11  -3 3336.97 1048.14   2
  11  11  -3 4623.78 1180.84   1
 -11 -11  -3 4216.48 538.135   6
 -11 -11  -3 3744.97 634.358   5
 -11  22  -3 4609.26 1406.24   2
 -11  22   0 22668.4 1895.69   2
 -22  11   0 24599.9 2273.48   2
  22 -11   0 24910.0 2094.14   1
  11  11   0 25877.1 2036.54   1
 -22  11   3 4686.03 691.636   3
  11 -22   3 4039.09 734.654   7
 -11 -11   3 4106.87 786.922   7
 -11  22   3 4269.69 717.101   3
 -22  11   6 2302.04 626.691   3
 -11  22   6 2298.40 638.132   3
  12  10 -10 113.101 327.202   4
 -12  22 -10 318.622 346.959   4
 -10 -12 -10 767.599 333.680   6
 -22  12 -10 1216.75 441.266   6
 -12  22 -10 295.620 463.542   6
 -10 -12  -7 6220.16 717.233   6
 -12  22  -7 5315.24 655.929   4
 -22  12  -7 4536.29 666.699   6
  10 -22  -7 5455.88 743.286   5
 -12  22  -4 13669.5 840.295   4
 -22  12  -4 12110.3 1646.91   2
  12  10  -4 14155.8 1888.49   1
 -10 -12  -4 14030.2 834.081   6
  22 -10  -4 14044.2 2068.28   1
 -10 -12  -4 12043.4 924.092   5
  10 -22  -4 12179.8 1017.02   5
 -12  22  -4 15550.8 2138.55   2
 -22  12  -1 8000.67 1415.66   2
  22 -10  -1 7226.85 1401.01   1
  12  10  -1 7699.18 1339.46   1
 -12  22  -1 6695.64 1252.05   2
  10 -22   2 1949.39 545.264   7
  12  10   2 1816.83 804.655   1
  10 -22   5 18258.5 1621.99   7
 -10 -12   5 17811.3 1458.80   7
 -12  22   5 19228.4 1207.34   3
 -22  12   5 19051.4 1201.00   3
 -22  13 -11 196.759 297.450   6
 -13  22 -11 90.6207 329.895   6
 -13  22  -8 3756.43 586.090   4
  -9 -13  -8 3816.66 653.686   6
 -22  13  -8 3653.48 646.074   6
 -13  22  -8 4010.14 757.492   6
   9 -22  -8 3945.36 625.297   5
 -22  13  -5 2661.63 1202.39   2
  13   9  -5 2317.46 1067.97   1
  -9 -13  -5 2400.02 522.048   6
  22  -9  -5 3581.24 1396.28   1
 -13  22  -5 2676.79 522.244   4
 -22  13  -5 2311.05 523.608   6
  -9 -13  -5 2843.56 653.520   5
 -13  22  -5 2614.16 1319.29   2
   9 -22  -5 2233.29 668.792   5
 -22  13  -2 3731.26 1043.25   2
  22  -9  -2 4850.18 1400.08   1
  13   9  -2 4751.62 1243.72   1
 -13  22  -2 5190.78 1217.90   2
  13   9   1 3192.31 937.361   1
   9 -22   1 3020.90 616.512   7
 -22  13   1 3042.15 1011.73   2
   9 -22   4 30388.4 1955.11   7
  -9 -13   4 28353.4 1805.23   7
 -22  13   4 29328.8 1484.72   3
 -13  22   4 30776.6 1493.92   3
 -13  22   7 13747.1 989.391   3
 -22  13   7 15095.9 1080.85   3
 -14  22  -9 4508.35 563.429   4
 -14  22  -9 4862.19 725.091   6
  -8 -14  -9 3942.93 512.829   6
 -22  14  -9 3980.36 617.645   6
 -14  22  -6 18344.8 995.139   4
  -8 -14  -6 19408.9 1059.29   6
 -22  14  -6 14847.1 977.190   6
  -8 -14  -6 17641.4 1103.46   5
   8 -22  -6 18567.4 1203.41   5
  -8 -14  -3 26206.6 1073.82   6
  22  -8  -3 24548.2 2601.86   1
 -14  22  -3 22925.3 2281.72   2
 -22  14  -3 23834.0 2247.13   2
  14   8  -3 22477.6 2221.45   1
  -8 -14  -3 21789.1 1190.55   5
   8 -22  -3 26510.4 1341.14   5
 -22  14   0 8235.86 1431.37   2
  22  -8   0 7861.71 1240.59   1
  14   8   0 6840.66 1243.45   1
 -14  22   0 7135.63 1292.64   2
   8 -22   3 34648.5 1956.68   7
 -14  22   3 35554.2 1609.69   3
  -8 -14   3 30924.7 1883.63   7
 -22  14   3 33871.0 1553.89   3
 -14  22   6 18064.4 1153.11   3
 -22  14   6 17575.3 1172.22   3
 -22  15 -10 1766.68 479.156   6
 -15  22 -10 1940.06 523.681   6
  -7 -15 -10 977.369 298.108   6
 -15  22 -10 934.576 341.695   4
  -7 -15  -7 14283.8 925.003   6
 -15  22  -7 12248.5 849.252   4
 -22  15  -7 12032.5 885.610   6
   7 -22  -7 13440.4 1009.17   5
 -15  22  -4 8992.94 686.278   4
 -22  15  -4 7684.13 1482.20   2
  15   7  -4 9952.96 1685.79   1
  -7 -15  -4 8904.72 697.399   6
  22  -7  -4 8734.99 1805.53   1
   7 -22  -4 9257.75 873.159   5
  -7 -15  -4 8385.78 810.459   5
 -15  22  -4 10812.7 1780.40   2
  22  -7  -1 19475.0 2084.66   1
 -15  22  -1 20352.5 1919.13   2
 -22  15  -1 21848.6 2093.96   2
  15   7  -1 18885.6 1853.06   1
   7 -22   2 28581.5 1758.40   7
  -7 -15   2 27359.7 1793.86   7
 -15  22   2 31186.3 1461.26   3
 -22  15   2 28086.6 1349.20   3
 -22  15   5 7767.71 879.964   3
   7 -22   5 9792.55 1237.96   7
  -7 -15   5 8406.76 1150.25   7
 -15  22   5 9402.47 891.141   3
 -22  16 -11 4487.12 409.972   6
 -16  22 -11 1808.68 353.079   6
 -16  22  -8 1436.40 457.102   4
  -6 -16  -8 2476.48 503.367   6
 -22  16  -8 722.672 525.856   6
 -16  22  -8 1755.59 659.329   6
 -16  22  -5 9975.26 1881.00   2
 -16  22  -5 7875.20 689.966   4
 -22  16  -5 7192.72 1603.93   2
  16   6  -5 6236.47 1609.48   1
 -22  16  -5 7684.92 714.264   6
  22  -6  -5 7509.83 1798.46   1
  -6 -16  -5 7019.63 813.631   5
  -6 -16  -5 7815.26 704.522   6
   6 -22  -5 7619.56 911.739   5
 -16  22  -2 7577.49 1480.76   2
 -22  16  -2 10600.1 1558.50   2
  16   6  -2 9273.16 1597.62   1
  -6 -16  -2 10987.1 679.213   6
  22  -6  -2 8110.91 1593.07   1
  -6 -16  -2 10000.2 828.027   5
   6 -22  -2 10446.2 905.320   5
 -22  16   1 9646.36 1361.10   2
   6 -22   1 9072.62 1063.16   7
  16   6   1 8745.83 1332.03   1
 -22  16   4 193.225 511.472   3
   6 -22   4 915.519 659.569   7
  -6 -16   4 771.667 572.098   7
 -16  22   4 274.583 537.107   3
 -16  22   7 5669.17 750.556   3
 -22  16   7 6365.45 805.997   3
 -22  17  -9 4323.75 582.123   6
 -17  22  -9 5571.44 703.605   6
 -17  22  -9 4415.73 503.728   4
  -5 -17  -9 3490.26 471.519   6
 -17  22  -6 17308.3 953.307   4
 -22  17  -6 17179.5 1031.17   6
  -5 -17  -6 17183.2 969.360   6
  -5 -17  -6 16825.5 1078.36   5
   5 -22  -6 18015.6 1191.69   5
 -17  22  -3 3941.34 1231.66   2
 -22  17  -3 3984.94 1288.61   2
  17   5  -3 4826.68 1343.40   1
 -17  22  -3 4162.27 491.231   4
   5 -22  -3 3552.14 467.367   6
  22  -5  -3 4121.50 1390.56   1
  -5 -17  -3 3979.42 521.403   6
  -5 -17  -3 3401.61 578.470   5
   5 -22  -3 4083.34 678.497   5
 -17  22   0 4487.97 1062.13   2
 -22  17   0 3596.50 1060.63   2
  17   5   0 4547.79 1127.36   1
  22  -5   0 3759.69 968.632   1
 -22  17   3 1150.38 572.300   3
   5 -22   3 978.419 581.547   7
  -5 -17   3 978.483 585.347   7
 -17  22   3 733.196 512.370   3
 -17  22   6 12132.8 985.288   3
 -22  17   6 11514.0 985.612   3
 -22  18 -10 5704.51 558.006   6
 -18  22 -10 3778.79 500.305   6
  -4 -18  -7 673.969 457.770   6
 -22  18  -7 1235.47 553.066   6
 -18  22  -7 40.1249 587.577   6
 -18  22  -7-2.02769 375.794   4
  -4 -18  -7 248.294 472.284   5
   4 -22  -7 398.091 535.481   5
 -18  22  -4 5091.71 1387.69   2
  18   4  -4 5228.57 1522.07   1
 -22  18  -4 4983.88 1263.87   2
   4 -22  -4 5547.77 561.054   6
  -4 -18  -4 4879.65 582.715   6
 -18  22  -4 5731.21 581.340   4
  22  -4  -4 4082.51 1455.64   1
  -4 -18  -4 5577.20 742.196   5
   4 -22  -4 5206.69 756.198   5
  18   4  -1 11205.2 1583.17   1
 -18  22  -1 11011.0 1629.23   2
 -22  18  -1 10487.3 1614.29   2
  -4 -18  -1 12562.8 927.539   5
   4 -22  -1 12365.5 914.020   5
  22  -4  -1 9767.43 1520.48   1
  -4 -18  -1 12331.3 726.236   6
   4 -22   2 16058.2 1428.71   7
  -4 -18   2 16142.7 1421.54   7
 -18  22   2 16510.2 1115.85   3
 -22  18   2 15441.0 1052.93   3
   4 -22   5 18732.4 1665.23   7
  -4 -18   5 16104.5 1572.79   7
 -18  22   5 16016.2 1122.73   3
 -22  18   5 16992.1 1164.05   3
 -22  18   8-329.425 491.868   3
 -22  19 -11 2107.62 313.220   6
 -19  22 -11 2090.56 320.745   6
 -22  19  -8 1402.71 569.166   6
 -19  22  -8 2211.76 620.960   6
  -3 -19  -8 1558.35 425.786   6
 -19  22  -5 40762.5 1443.04   4
  -3 -19  -5 38577.2 1428.65   6
  -3 -19  -5 43506.3 1722.43   5
   3 -22  -5 39971.2 1760.77   5
   3 -22  -5 42512.6 1452.95   6
 -19  22  -2 928.611 897.390   2
  -3 -19  -2 827.154 376.539   6
 -22  19  -2 1467.33 953.033   2
  19   3  -2 438.323 858.281   1
   3 -22  -2 493.248 330.690   6
  22  -3  -2 2241.47 1088.03   1
  -3 -19  -2 464.918 493.387   5
   3 -22  -2 2367.43 636.877   5
   3 -22   1 23774.9 1719.73   7
 -19  22   1 24219.8 1327.43   3
 -22  19   1 24221.4 1279.67   3
  -3 -19   1 27338.7 1262.90   5
 -22  19   4 6204.78 802.135   3
   3 -22   4 5546.43 971.593   7
  -3 -19   4 6431.89 1034.37   7
 -19  22   4 6134.21 803.955   3
 -19  22   7 50870.2 1963.05   3
 -22  19   7 54654.8 2033.20   3
 -22  20  -9 14689.2 874.392   6
 -20  22  -9 15348.2 930.795   6
   2 -22  -6 2984.43 477.959   6
  -2 -20  -6 2308.42 504.508   6
 -22  20  -6 2343.54 582.885   6
 -20  22  -6 2355.76 591.522   6
  -2 -20  -6 3926.98 694.793   5
   2 -22  -6 1550.09 606.847   5
 -22  20  -3 31903.0 2597.13   2
  22  -2  -3 30293.6 2873.60   1
  20   2  -3 28354.0 2767.68   1
 -20  22  -3 26680.6 2472.33   2
  -2 -20  -3 30182.6 1204.14   6
   2 -22  -3 28929.2 1454.25   5
   2 -22  -3 31074.7 1207.26   6
  -2 -20  -3 27544.0 1360.73   5
 -20  22   0 19872.4 1145.96   3
 -22  20   0 19906.3 1139.92   3
  20   2   0 18017.8 1871.68   1
  -2 -20   0 22328.2 1192.88   5
   2 -22   0 20749.1 1171.37   5
   2 -22   3 31935.2 2049.13   7
  -2 -20   3 34263.1 2148.75   7
 -20  22   3 32181.6 1560.36   3
 -22  20   3 30687.9 1522.06   3
 -20  22   6 665.819 558.786   3
 -22  20   6 1526.70 602.514   3
 -22  21 -10-49.8425 335.731   6
 -21  22 -10-269.534 364.928   6
  -1 -21  -7 5665.92 611.563   6
 -22  21  -7 8407.99 801.359   6
 -21  22  -7 7724.74 834.175   6
  -1 -21  -7 6706.32 713.764   5
   1 -22  -7 6640.90 719.661   5
  21   1  -4 10356.4 1974.40   1
 -21  22  -4 10258.9 1734.79   2
 -22  21  -4 9282.63 1718.54   2
  -1 -21  -4 8234.17 674.410   6
 -21  22  -4 7372.59 694.183   6
   1 -22  -4 8969.61 687.146   6
  -1 -21  -4 7873.77 815.146   5
   1 -22  -4 8691.76 881.456   5
  22  -1  -4 6365.29 1701.61   1
  22  -1  -1 23423.1 2205.34   1
 -22  21  -1 21672.9 2235.85   2
 -21  22  -1 23054.1 2140.50   2
  21   1  -1 24037.7 2231.60   1
 -21  22  -1 24756.7 1239.34   3
 -22  21  -1 24848.6 1254.65   3
  -1 -21  -1 28231.0 1358.69   5
   1 -22  -1 27166.0 1355.87   5
  -1 -21  -1 26797.7 1082.51   6
   1 -22   2 22366.6 1758.13   7
  -1 -21   2 22026.0 1766.22   7
 -21  22   2 23630.5 1309.75   3
 -22  21   2 22796.8 1287.52   3
 -21  22   5 1405.77 633.115   3
 -22  21   5 1893.97 623.696   3
 -21  22   8 5699.55 670.076   3
 -22  21   8 4204.98 628.572   3
 -22  22  -8 2592.11 559.220   6
 -22  22  -5-706.953 520.894   6
   0 -22  -5-172.254 425.715   6
   0 -22  -5-1268.20 636.057   5
  22   0  -2 6841.60 1636.79   1
 -22  22  -2 5292.12 1274.39   2
   0 -22  -2 6566.41 586.307   6
   0 -22  -2 6715.03 771.847   5
   0 -22   1 234.669 515.177   5
 -22  22   1-14.4940 517.307   3
   0 -22   4 2407.64 811.458   7
 -22  22   4 1005.66 611.694   3
 -22  22   7-90.4195 509.229   3
   0  23  -8 16483.4 872.147   4
 -23   0  -8 16280.8 896.754   6
  23 -23  -8 16465.2 904.805   5
   0  23  -5 226.902 408.615   4
 -23   0  -5-29.2669 434.184   6
   0  23  -2 42107.6 2894.46   1
   0  23  -2 38362.3 1370.49   4
   0  23  -2 37827.5 3459.95   2
 -23   0  -2 39152.0 1804.65   5
 -23   0  -2 39838.2 1771.82   3
 -23   0   1 169.334 598.111   3
   0  23   1 268.365 791.751   1
 -23   0   4 17783.9 1308.83   3
 -23   0   7 561.689 487.334   3
   1  22  -9 424.061 341.874   4
  -1  23  -9 1681.79 395.805   4
 -22  -1  -9 1575.46 437.961   6
 -23   1  -9 1079.59 400.189   6
  -1  23  -9 1139.18 389.270   6
  22 -23  -6 198.373 570.899   5
   1  22  -6 823.233 432.011   4
  -1  23  -6 1400.15 452.507   4
 -22  -1  -6 837.900 491.703   6
 -23   1  -6 643.449 506.737   6
 -22  -1  -3 7688.41 675.997   6
   1  22  -3 7988.72 1405.41   1
   1  22  -3 7027.25 611.937   4
  -1  23  -3 7279.93 638.265   4
  -1  23  -3 7984.00 1483.32   1
 -22  -1  -3 8767.06 939.171   5
   1  22  -3 7396.76 1944.78   2
  -1  23  -3 8861.46 1980.61   2
  -1  23   0 12551.4 1605.41   1
   1  22   0 13829.3 1742.39   1
 -22  -1   0 13155.2 1056.23   5
  -1  23   0 11251.6 2043.20   2
 -23   1   0 14505.3 1133.28   3
 -22  -1   0 13509.9 1122.31   3
 -23   1   3 9371.94 1011.92   3
 -22  -1   3 9362.59 1034.82   3
 -23   1   6 20598.4 1296.62   3
 -22  -1   6 20204.5 1278.96   3
   2  21 -10 1772.11 322.664   4
 -21  -2 -10 2270.64 351.318   6
 -23   2 -10 1845.78 350.018   6
  -2  23 -10 1915.97 356.205   4
  21 -23  -7 7650.71 788.993   5
  23 -21  -7 6146.81 740.706   5
   2  21  -7 5764.84 615.681   4
  -2  23  -7 6502.15 665.625   4
 -21  -2  -7 7413.39 751.341   6
 -23   2  -7 6732.30 712.627   6
   2  21  -4 1046.91 392.792   4
  -2  23  -4 1839.37 479.355   4
 -21  -2  -4 1133.52 476.398   6
 -23   2  -4 461.566 408.977   6
  -2  23  -4 1815.16 1163.96   1
   2  21  -4 253.679 1322.22   2
 -21  -2  -4 473.195 518.055   5
   2  21  -4-641.942 823.696   1
  -2  23  -4 631.634 1410.51   2
   2  21  -1 9699.44 1485.77   1
  -2  23  -1 9895.37 1470.46   1
 -21  -2  -1 9014.35 889.499   5
 -23   2  -1 9399.83 942.080   3
  -2  23  -1 7781.81 1766.05   2
 -23   2   2 5370.69 870.800   3
 -21  -2   2 6612.65 887.461   3
   2  21   2 5636.87 1156.93   1
 -23   2   5 22424.8 1401.90   3
 -21  -2   5 23406.7 1440.02   3
   3  20  -8 711.890 434.075   4
 -20  -3  -8 1102.35 519.371   6
 -23   3  -8 603.313 480.622   6
  -3  23  -8 1383.93 527.859   4
  20 -23  -8 1978.65 525.890   5
   3  20  -5 32072.3 1273.47   4
  -3  23  -5 33725.1 1358.51   4
 -20  -3  -5 34005.1 1396.74   6
 -23   3  -5 31487.2 1330.69   6
 -20  -3  -5 33104.3 1492.08   5
   3  20  -2 21677.3 2048.06   1
  -3  23  -2 21591.6 2009.91   1
  -3  23  -2 21697.7 979.301   4
  -3  23  -2 22129.3 2601.09   2
 -20  -3  -2 19448.3 1238.15   5
   3  20   1 23228.1 2148.17   1
 -20  -3   1 26991.1 1408.33   5
 -23   3   1 27226.8 1464.93   3
 -23   3   4 32674.0 1642.28   3
 -20  -3   4 34060.4 1721.15   3
 -23   3   7 3275.58 624.866   3
   4  19  -9 3128.61 481.095   4
  -4  23  -9 3030.71 517.787   4
 -19  -4  -9 3873.83 545.321   6
 -23   4  -9 3122.05 525.281   6
  -4  23  -9 2667.63 536.895   6
  19 -23  -6 1428.40 619.885   5
   4  19  -6 1417.54 410.288   4
 -19  -4  -6 1917.19 580.882   6
 -23   4  -6 2344.66 576.411   6
  -4  23  -6 1946.51 520.413   4
  -4  23  -3 17120.4 903.372   4
  -4  23  -3 14380.0 1702.15   1
 -19  -4  -3 16501.0 935.515   6
 -19  -4  -3 15489.8 1120.88   5
  -4  23  -3 16461.6 2350.63   2
   4  19  -3 17199.2 1893.44   1
   4  19   0 3023.80 1024.55   1
  -4  23   0 2017.80 912.997   1
 -23   4   0 1635.72 601.734   3
  -4  23   0 1445.37 1061.47   2
 -19  -4   0 2263.14 594.046   5
 -23   4   3 19769.9 1314.53   3
 -19  -4   3 20842.6 1343.73   3
 -19  -4   6 33504.0 1625.54   3
 -23   4   6 32626.7 1599.96   3
   5  18 -10 4397.93 419.455   4
 -18  -5 -10 4743.40 469.029   6
 -23   5 -10 4679.94 473.194   6
  -5  23 -10 3990.66 456.737   6
  -5  23 -10 4990.74 514.582   4
   5  18  -7 2004.07 471.339   4
  -5  23  -7 2294.57 569.068   4
 -18  -5  -7 1789.98 589.838   6
 -23   5  -7 1606.70 542.256   6
  18 -23  -7 1931.83 620.444   5
   5  18  -4 13182.1 783.887   4
  -5  23  -4 13823.9 882.295   4
   5  18  -4 12131.6 1634.91   1
 -18  -5  -4 11619.3 868.101   6
 -23   5  -4 13464.0 825.602   6
  -5  23  -4 13196.3 1593.51   1
 -18  -5  -4 12108.5 970.124   5
  -5  23  -4 14170.6 2405.33   2
   5  18  -1 28151.7 2238.09   1
  -5  23  -1 25890.4 2104.47   1
  -5  23  -1 27559.6 2660.51   2
 -18  -5  -1 25146.9 1330.87   5
 -23   5  -1 27203.3 1403.56   3
 -23   5   2 3359.93 689.022   3
   5  18   2 2887.03 1039.02   1
 -18  -5   2 2926.10 680.541   5
 -23   5   5 2818.82 656.338   3
 -18  -5   5 1848.75 677.495   3
  -6  23 -11 294.982 234.523   4
 -23   6 -11 454.149 233.243   6
   6  17  -8 13574.7 851.368   4
  -6  23  -8 11964.4 876.926   4
 -17  -6  -8 12937.9 927.217   6
 -23   6  -8 14727.1 924.922   6
  17 -23  -8 14017.8 929.542   5
  17 -23  -5 2089.09 642.942   5
   6  17  -5 2642.55 1210.89   1
   6  17  -5 3556.48 522.002   4
  -6  23  -5 3181.45 567.062   4
 -17  -6  -5 2793.51 601.621   6
 -23   6  -5 3443.31 581.369   6
 -17  -6  -5 2922.96 648.757   5
  -6  23  -2 23923.0 1991.65   1
 -17  -6  -2 24576.8 1112.98   6
  -6  23  -2 27227.2 2715.21   2
 -17  -6  -2 23915.2 1291.16   5
   6  17  -2 23432.0 2088.95   1
   6  17   1 1064.14 850.584   1
 -23   6   1 805.457 559.712   3
 -17  -6   1 1038.24 534.344   5
 -23   6   4 4499.74 737.151   3
 -17  -6   4 4653.98 770.813   3
 -23   6   7 17566.5 1125.18   3
  -7  23  -9-255.045 457.164   4
 -16  -7  -9 198.753 425.306   6
 -23   7  -9-146.443 442.198   6
  -7  23  -9-477.612 523.523   6
   7  16  -9 143.356 361.384   4
  16 -23  -6-338.977 601.705   5
   7  16  -6 436.559 420.899   4
  -7  23  -6 196.435 470.425   4
 -16  -7  -6 489.165 575.598   6
 -23   7  -6 978.028 534.605   6
  -7  23  -3 37148.7 1381.71   4
  -7  23  -3 35724.6 2391.76   1
 -16  -7  -3 35088.8 1397.61   6
  -7  23  -3 39149.1 3287.53   2
 -16  -7  -3 35881.3 1574.72   5
 -23   7  -3 36343.2 2995.97   2
  16 -23  -3 37466.3 1666.40   5
   7  16  -3 35659.2 2662.57   1
   7  16   0-441.947 734.001   1
 -16  -7   0 644.406 467.683   5
  -7  23   0 65.6332 829.557   2
   7  16   3 7101.27 1239.75   1
 -23   7   3 6876.88 812.498   3
 -16  -7   3 7428.81 827.976   5
 -23   7   6 389.096 573.244   3
 -16  -7   6 1658.48 638.949   3
   8  15 -10 1341.27 336.526   4
  -8  23 -10 1352.41 387.131   4
 -23   8 -10 1613.60 397.727   6
  -8  23 -10 2165.30 457.143   6
 -15  -8 -10 2060.38 393.323   6
   8  15  -7 116.828 426.933   4
  -8  23  -7-17.5751 497.965   4
 -15  -8  -7 255.171 545.390   6
 -23   8  -7 427.687 508.742   6
  15 -23  -7 923.900 610.958   5
  15 -23  -4 513.231 527.685   5
 -15  -8  -4 735.305 518.787   6
 -23   8  -4 375.237 912.875   2
  -8  23  -4 473.970 420.189   4
 -15  -8  -4 749.117 509.286   5
  -8  23  -4 24.6108 1135.33   2
   8  15  -4 595.001 863.018   1
  -8  23  -1 160550. 6249.18   2
 -15  -8  -1 142465. 3703.43   5
  15 -23  -1 154718. 3807.64   5
   8  15  -1 148871. 5425.05   1
 -23   8   2-310.834 539.316   3
   8  15   2-558.910 740.048   1
 -15  -8   2 108.793 537.221   5
 -23   8   5 13906.4 1112.68   3
 -15  -8   5 16146.4 1168.99   3
  -9  23 -11 434.246 266.604   4
 -23   9 -11 862.095 273.590   6
  -9  23  -8 1858.61 572.194   4
   9  14  -8 1790.62 477.851   4
 -14  -9  -8 1943.36 571.566   6
 -23   9  -8 3278.13 610.928   6
  14 -23  -8 1373.95 523.902   5
  14 -23  -5 8281.80 887.150   5
  -9  23  -5 9223.21 766.039   4
 -23   9  -5 7422.95 1845.57   2
 -14  -9  -5 8529.98 799.600   6
 -23   9  -5 8351.54 740.450   6
 -14  -9  -5 8416.37 844.560   5
   9  14  -5 9579.95 1720.18   1
  -9  23  -5 9362.58 1915.86   2
 -23   9  -2 10221.7 1775.11   2
 -14  -9  -2 15800.7 882.395   6
 -14  -9  -2 13390.9 947.617   5
  14 -23  -2 13616.3 1042.37   5
  -9  23  -2 13621.2 1899.72   2
   9  14  -2 11777.1 1601.54   1
   9  14   1 19262.1 1850.60   1
  -9  23   1 23511.0 1248.73   3
 -23   9   4 7929.29 880.315   3
  14 -23   4 8646.90 1044.12   7
  -9  23   4 9992.61 972.707   3
 -23   9   7 3144.37 658.552   3
  10  13  -9 9468.84 683.101   4
 -10  23  -9 8463.50 717.210   4
 -13 -10  -9 9546.26 720.094   6
 -23  10  -9 10754.6 784.025   6
 -10  23  -9 8667.49 816.828   6
 -23  10  -6 12184.3 873.218   6
 -10  23  -6 12594.2 891.000   4
 -13 -10  -6 14641.3 1003.07   6
 -13 -10  -6 12966.0 940.850   5
  13 -23  -6 12583.0 1066.90   5
 -13 -10  -3 39977.1 1461.75   6
 -10  23  -3 40636.9 1431.12   4
 -10  23  -3 40283.3 3210.69   2
 -13 -10  -3 38671.1 1609.98   5
 -23  10  -3 33555.7 2815.57   2
  13 -23  -3 40185.9 1701.34   5
  10  13  -3 36551.7 2760.99   1
  10  13   0 9446.49 1381.22   1
 -10  23   0 7962.89 1284.55   2
  13 -23   3 20087.2 1439.78   7
 -10  23   3 24120.4 1335.92   3
 -23  10   3 20627.4 1246.62   3
 -23  10   6 20208.3 1270.91   3
  11  12 -10 2510.03 382.210   4
 -23  11 -10 2877.66 467.739   6
 -11  23 -10 4157.30 554.932   6
 -11  23 -10 2884.97 447.531   4
 -12 -11 -10 3510.74 424.902   6
 -12 -11  -7 9147.26 831.279   6
 -23  11  -7 7985.51 786.636   6
 -11  23  -7 6288.24 685.277   4
  12 -23  -7 8021.10 883.296   5
 -11  23  -4 25785.1 1152.52   4
 -23  11  -4 24321.1 2429.30   2
 -12 -11  -4 25157.7 1160.52   6
 -11  23  -4 24539.3 2607.72   2
 -12 -11  -4 23681.1 1297.37   5
  11  12  -4 26663.8 2453.97   1
  12 -23  -4 24945.4 1363.92   5
 -12 -11  -1 13518.6 910.749   5
 -23  11  -1 15475.4 1984.60   2
  11  12  -1 14209.0 1698.02   1
 -11  23  -1 14455.7 1731.51   2
  12 -23   2 9268.94 995.842   7
 -11  23   2 10953.7 966.619   3
 -23  11   2 9285.60 873.886   3
  11  12   2 10072.8 1329.32   1
  12 -23   5 11087.9 1312.43   7
 -23  11   5 10458.1 1008.48   3
 -11  23   5 10135.8 971.998   3
 -23  12 -11 758.385 274.853   6
 -12  23 -11 56.8920 276.471   6
 -12  23  -8 6593.86 692.886   4
 -23  12  -8 7032.14 745.607   6
 -12  23  -8 7333.36 869.772   6
  11 -23  -8 7015.32 757.500   5
 -11 -12  -8 7477.02 738.213   6
 -12  23  -5 10547.5 787.170   4
 -23  12  -5 10662.9 1823.13   2
  23 -11  -5 8426.63 1959.29   1
 -11 -12  -5 9880.29 821.029   6
 -23  12  -5 9877.90 763.431   6
  12  11  -5 11185.7 1895.39   1
 -11 -12  -5 10027.1 866.285   5
  11 -23  -5 9973.66 947.084   5
 -12  23  -5 11862.8 1950.29   2
 -23  12  -2 8198.46 1539.56   2
  12  11  -2 8421.30 1343.56   1
 -11 -12  -2 8530.33 757.388   5
  11 -23  -2 8627.08 864.309   5
 -11 -12  -2 9808.62 710.447   6
 -12  23  -2 9566.38 1603.03   2
  11 -23   1 14196.3 1149.38   7
  12  11   1 13866.2 1580.55   1
  11 -23   4 23686.2 1715.42   7
 -11 -12   4 21324.3 1580.21   7
 -12  23   4 24498.2 1379.43   3
 -23  12   4 23437.4 1346.83   3
 -23  12   7 8859.76 883.972   3
 -13  23  -9 653.513 416.613   4
 -10 -13  -9 1025.67 418.740   6
 -23  13  -9 1621.24 525.697   6
 -13  23  -9 1272.07 580.790   6
 -13  23  -6 18221.8 1005.92   4
 -10 -13  -6 18360.6 1079.28   6
 -23  13  -6 16928.3 993.597   6
  10 -23  -6 18679.5 1256.15   5
 -10 -13  -6 18903.0 1121.82   5
 -10 -13  -3 22851.7 1032.13   6
  23 -10  -3 19321.0 2341.82   1
 -13  23  -3 18565.2 2140.10   2
 -23  13  -3 17624.1 2078.86   2
 -10 -13  -3 18974.4 1096.09   5
  13  10  -3 19563.7 2131.63   1
  10 -23  -3 20798.0 1215.97   5
 -23  13   0 9855.76 1635.70   2
  13  10   0 9214.70 1449.09   1
 -13  23   0 8448.84 1311.76   2
  10 -23   3 38161.6 2058.80   7
 -10 -13   3 35227.7 2063.70   7
 -23  13   3 38724.3 1681.13   3
 -13  23   6 12988.9 1038.33   3
 -23  13   6 13579.8 1060.53   3
  -9 -14 -10 334.013 286.910   6
 -14  23 -10 8.30876 294.242   4
 -23  14 -10 427.855 380.099   6
 -14  23 -10 583.173 418.765   6
 -14  23  -7 2065.90 505.453   4
  -9 -14  -7 2557.85 592.021   6
 -23  14  -7 1615.49 525.588   6
   9 -23  -7 1694.62 612.312   5
 -14  23  -4 8513.72 709.968   4
 -23  14  -4 6005.83 1298.76   2
  14   9  -4 8668.11 1678.30   1
  23  -9  -4 7872.42 1772.38   1
   9 -23  -4 9281.02 897.159   5
  -9 -14  -4 8500.96 823.487   5
 -14  23  -4 10308.3 1770.30   2
  -9 -14  -4 8171.79 716.253   6
  14   9  -1 22120.6 2056.35   1
  23  -9  -1 24407.8 2282.94   1
 -14  23  -1 21880.2 2041.13   2
  -9 -14  -1 21842.9 1150.28   5
 -23  14  -1 24005.7 2349.36   2
   9 -23   2 13632.3 1223.79   7
 -23  14   2 14626.3 1048.57   3
 -14  23   2 14331.6 1034.42   3
 -23  14   5 8277.15 859.328   3
   9 -23   5 8934.58 1209.62   7
  -9 -14   5 7659.99 1109.78   7
 -14  23   5 9112.51 900.836   3
 -23  15 -11 2606.00 331.321   6
 -15  23 -11 1598.66 310.895   6
 -15  23  -8 2367.25 500.292   4
  -8 -15  -8 2692.53 544.849   6
 -23  15  -8 1844.48 570.133   6
 -15  23  -8 2480.36 697.312   6
   8 -23  -8 2222.60 546.848   5
 -15  23  -5 18229.8 2353.30   2
 -15  23  -5 14400.1 883.597   4
 -23  15  -5 11153.8 1810.76   2
  -8 -15  -5 13438.7 914.509   6
  15   8  -5 13056.3 2089.76   1
 -23  15  -5 13534.5 856.766   6
  23  -8  -5 14914.7 2287.90   1
  -8 -15  -5 14308.9 996.801   5
   8 -23  -5 15185.4 1164.10   5
 -23  15  -2 728.959 956.576   2
  15   8  -2 214.594 890.769   1
  23  -8  -2 644.689 1031.38   1
  -8 -15  -2 178.683 340.154   6
  -8 -15  -2 412.195 514.135   5
   8 -23  -2 799.156 551.644   5
 -15  23  -2-496.686 785.842   2
   8 -23   1 143709. 4498.04   7
 -15  23   1 153849. 3871.30   3
 -23  15   1 144766. 3763.59   3
 -23  15   1 150548. 5618.49   2
 -23  15   4 850.029 542.724   3
   8 -23   4 1307.63 687.089   7
  -8 -15   4 763.230 723.751   7
 -15  23   4 234.362 567.750   3
 -23  15   7 1108.31 616.686   3
 -15  23   7 1046.92 545.955   3
 -16  23  -9 277.691 363.479   4
  -7 -16  -9 790.417 367.534   6
 -23  16  -9 373.127 471.076   6
 -16  23  -9 500.433 550.634   6
 -16  23  -6 838.457 429.358   4
  -7 -16  -6 1788.00 535.085   6
 -23  16  -6 1358.89 480.800   6
  -7 -16  -6 1084.13 541.414   5
   7 -23  -6 1711.81 637.299   5
 -16  23  -3 4439.82 1297.77   2
 -16  23  -3 7586.21 666.748   4
 -23  16  -3 5039.39 1302.95   2
  -7 -16  -3 7918.35 687.666   6
  16   7  -3 6282.43 1425.92   1
  23  -7  -3 7759.65 1724.11   1
  -7 -16  -3 5924.33 708.544   5
   7 -23  -3 8208.46 910.972   5
 -23  16   0-723.623 925.008   2
  -7 -16   0 163.840 348.400   6
  16   7   0 774.608 830.189   1
  -7 -16   0 103.391 472.871   5
   7 -23   3 36267.8 2107.58   7
  -7 -16   3 36781.3 2143.17   7
 -16  23   3 36129.1 1642.03   3
 -23  16   3 34601.8 1590.68   3
 -23  16   6 1616.88 632.317   3
 -16  23   6-103.443 507.710   3
 -23  17 -10 7669.50 585.142   6
 -17  23 -10 7190.21 602.914   6
 -17  23  -7 15788.4 905.874   4
 -23  17  -7 14883.4 973.195   6
 -17  23  -7 17547.8 1130.22   6
  -6 -17  -7 16186.1 929.619   6
  -6 -17  -7 14215.2 961.237   5
   6 -23  -7 16527.7 1084.07   5
 -17  23  -4 4814.21 1477.37   2
 -23  17  -4 4509.41 1252.32   2
  17   6  -4 5585.61 1641.85   1
  23  -6  -4 4519.01 1576.34   1
  -6 -17  -4 4174.48 579.978   6
 -17  23  -4 5053.64 571.474   4
  -6 -17  -4 4255.87 672.537   5
   6 -23  -4 5361.37 794.520   5
 -17  23  -1 784.480 850.775   2
 -23  17  -1 1365.82 1088.71   2
  17   6  -1 1220.56 866.341   1
  -6 -17  -1 1128.80 354.770   6
  23  -6  -1 691.029 907.449   1
  -6 -17  -1 1166.76 523.414   5
   6 -23  -1 2260.43 603.631   5
   6 -23   2 23683.0 1671.87   7
  -6 -17   2 21637.5 1682.45   7
 -17  23   2 24615.4 1343.16   3
 -23  17   2 23785.2 1284.69   3
 -23  17   5 2315.74 681.479   3
   6 -23   5 3905.49 978.985   7
  -6 -17   5 2351.09 843.409   7
 -17  23   5 4058.00 724.618   3
 -23  17   8 14418.4 956.481   3
  -5 -18  -8 6939.71 635.789   6
 -18  23  -8 7109.63 628.695   4
 -23  18  -8 6430.05 721.204   6
 -18  23  -8 7427.71 805.665   6
   5 -23  -8 7601.74 687.253   5
 -23  18  -5 1635.78 477.738   6
 -18  23  -5 2469.27 502.606   4
  -5 -18  -5 2249.59 615.717   5
  -5 -18  -5 2327.27 523.666   6
   5 -23  -5 1898.53 679.638   5
 -18  23  -2 2365.33 1090.28   2
 -23  18  -2 4091.73 1279.03   2
  -5 -18  -2 3139.59 466.401   6
  18   5  -2 2771.74 1183.30   1
  23  -5  -2 3801.84 1332.08   1
  -5 -18  -2 3020.18 615.401   5
   5 -23  -2 4126.99 719.783   5
   5 -23   1 25887.7 1782.29   7
 -18  23   1 27137.0 1387.57   3
 -23  18   1 25501.6 1330.83   3
  -5 -18   1 28074.9 1291.55   5
   5 -23   4 14971.8 1477.62   7
  -5 -18   4 14736.4 1482.27   7
 -18  23   4 12005.5 1018.13   3
 -23  18   4 13366.2 1064.91   3
 -18  23   7 2494.53 634.095   3
 -23  18   7 1014.48 583.355   3
  -4 -19  -9 1081.00 329.339   6
 -23  19  -9 1288.06 458.887   6
 -19  23  -9 1597.32 500.306   6
 -19  23  -6 29281.5 1214.14   4
 -23  19  -6 28044.2 1321.52   6
 -19  23  -6 30272.5 1441.57   6
  -4 -19  -6 30215.9 1446.80   5
   4 -23  -6 28782.9 1469.31   5
  -4 -19  -6 30006.2 1246.11   6
  -4 -19  -3 18446.5 1123.93   5
  -4 -19  -3 19891.9 971.042   6
 -19  23  -3 19855.8 973.866   4
   4 -23  -3 21275.7 976.762   6
  19   4  -3 19473.9 2280.25   1
 -19  23  -3 18572.6 2171.50   2
   4 -23  -3 18645.9 1220.24   5
 -23  19  -3 17665.5 2092.91   2
  23  -4  -3 21628.3 2559.01   1
 -23  19   0 1978.05 548.049   3
 -23  19   0 2572.43 1038.38   2
  19   4   0 2616.54 980.179   1
  -4 -19   0 1622.67 549.268   5
 -19  23   0 1562.17 518.411   3
   4 -23   0 2592.22 655.677   5
  -4 -19   0 1551.67 381.595   6
   4 -23   3 17780.4 1556.50   7
  -4 -19   3 17158.4 1549.91   7
 -19  23   3 16014.6 1134.59   3
 -23  19   3 16236.2 1124.74   3
 -19  23   6 1328.27 548.705   3
 -23  19   6 2607.51 730.387   3
 -23  20 -10 495.652 340.203   6
 -20  23 -10-880.695 412.936   6
  -3 -20  -7 3198.82 536.852   6
 -20  23  -7 4695.42 730.319   6
 -23  20  -7 3638.14 626.728   6
  -3 -20  -7 3287.76 604.780   5
   3 -23  -7 3487.50 621.176   5
   3 -23  -4 32278.6 1257.59   6
  23  -3  -4 31947.9 3198.53   1
  20   3  -4 33084.0 3155.04   1
 -23  20  -4 27939.3 2584.55   2
  -3 -20  -4 29928.6 1484.96   5
   3 -23  -4 32597.3 1570.66   5
 -20  23  -4 26894.9 2789.71   2
  -3 -20  -4 30808.8 1242.96   6
  23  -3  -1 24392.7 2304.45   1
 -20  23  -1 26351.2 2310.98   2
  -3 -20  -1 26790.6 1358.55   5
 -20  23  -1 26094.1 1268.46   3
 -23  20  -1 26807.3 1304.33   3
 -23  20  -1 27998.7 2453.14   2
  20   3  -1 24128.8 2242.24   1
   3 -23  -1 28217.0 1402.98   5
  -3 -20  -1 27097.8 1114.28   6
   3 -23   2 21562.2 1728.49   7
  -3 -20   2 21055.9 1723.69   7
 -20  23   2 21458.6 1268.66   3
 -23  20   2 21145.3 1264.46   3
 -20  23   5 33135.5 1595.85   3
 -23  20   5 35006.3 1663.29   3
 -23  20   8 708.394 450.598   3
  -2 -21  -8-267.843 358.689   6
 -23  21  -8-332.472 533.562   6
 -21  23  -8 778.340 509.172   6
   2 -23  -8-100.153 397.904   5
   2 -23  -5 22397.7 1038.83   6
  -2 -21  -5 21368.3 1027.64   6
 -23  21  -5 20281.7 1067.11   6
 -21  23  -5 20251.3 1152.29   6
  -2 -21  -5 21334.2 1253.63   5
   2 -23  -5 19735.9 1247.93   5
 -21  23  -2 5272.40 1409.53   2
 -23  21  -2 4324.79 1200.20   2
  21   2  -2 5372.26 1378.95   1
   2 -23  -2 4482.83 523.331   6
  -2 -21  -2 5236.02 580.686   6
  -2 -21  -2 5120.98 690.679   5
   2 -23  -2 5898.84 794.895   5
  23  -2  -2 3586.94 1197.23   1
 -21  23   1 9864.49 928.486   3
 -23  21   1 10772.4 931.157   3
  -2 -21   1 12056.6 925.444   5
   2 -23   1 11127.1 918.521   5
   2 -23   4 1750.44 786.447   7
  -2 -21   4 1519.59 769.664   7
 -21  23   4 1503.91 607.397   3
 -23  21   4 1115.06 604.990   3
 -21  23   7 6410.36 756.912   3
 -23  21   7 6646.60 802.255   3
 -23  22  -9 3208.67 486.706   6
 -22  23  -9 3514.13 499.980   6
   1 -23  -6 16829.7 916.161   6
 -23  22  -6 17168.1 1039.84   6
 -22  23  -6 17096.4 1044.05   6
  -1 -22  -6 16563.4 1101.90   5
   1 -23  -6 17857.1 1146.88   5
  -1 -22  -6 16375.0 940.350   6
  23  -1  -3 11063.3 1911.77   1
 -22  23  -3 6435.80 1558.41   2
  22   1  -3 7513.00 1698.27   1
 -23  22  -3 7842.75 1588.31   2
   1 -23  -3 8807.00 692.556   6
  -1 -22  -3 9218.86 697.579   6
   1 -23  -3 9944.15 940.619   5
  -1 -22  -3 8590.10 852.535   5
 -22  23   0 14620.6 1036.79   3
 -23  22   0 14083.5 998.721   3
  -1 -22   0 15711.3 1055.71   5
   1 -23   0 15110.8 1062.38   5
   1 -23   3 8634.11 1212.97   7
  -1 -22   3 8114.61 1214.49   7
 -22  23   3 7316.06 869.308   3
 -23  22   3 7018.40 860.170   3
 -22  23   6-85.8565 628.326   3
 -23  22   6-156.988 603.557   3
 -23  23 -10 8878.09 514.239   6
   0 -23  -7-265.003 345.370   6
   0 -23  -7-564.894 481.349   5
   0 -23  -4 16656.9 898.555   6
   0 -23  -4 15938.3 1097.73   5
 -23  23  -1 612.458 1021.33   2
  23   0  -1 514.413 1029.22   1
   0 -23  -1-284.407 546.326   5
 -23  23  -1-139.911 541.405   3
 -23  23   2 40868.2 1783.81   3
 -23  23   5 358.583 624.770   3
 -23  23   8 19069.7 1001.46   3
   0  24  -9 54.1959 295.145   4
 -24   0  -9 88.6811 308.490   6
  24 -24  -6 795.468 553.375   5
   0  24  -6 1648.41 425.475   4
 -24   0  -6 1964.14 477.101   6
   0  24  -3 177.670 357.508   4
   0  24   0 18856.3 2073.95   1
 -24   0   0 18473.7 1302.43   3
 -24   0   3-24.4900 636.957   3
 -24   0   6 651.368 583.724   3
  -1  24 -10 6645.16 418.342   4
 -23  -1 -10 6394.82 405.716   6
 -24   1 -10 6245.09 403.709   6
   1  23  -7 17423.3 902.001   4
  -1  24  -7 16960.2 917.269   4
 -23  -1  -7 18270.5 963.863   6
 -24   1  -7 17983.3 963.789   6
  23 -24  -7 17989.8 1072.79   5
  24 -23  -7 17756.2 1040.99   5
  -1  24  -4 6149.37 588.239   4
 -23  -1  -4 6139.37 649.629   6
 -24   1  -4 4970.88 620.435   6
   1  23  -4 5563.90 584.355   4
   1  23  -1 59377.6 3478.32   1
   1  23  -1 60254.7 1781.89   4
  -1  24  -1 60481.4 3492.39   1
  -1  24  -1 63529.4 4300.54   2
 -23  -1  -1 58389.5 2229.71   5
 -24   1  -1 61977.0 2261.16   3
 -23  -1  -1 60438.9 2278.82   3
 -24   1   2 2665.72 756.123   3
 -23  -1   2 1937.23 688.028   3
 -24   1   5 5899.35 857.055   3
 -23  -1   5 6789.14 909.205   3
   2  22  -8 3155.11 454.282   4
  -2  24  -8 3487.75 528.170   4
 -22  -2  -8 2922.08 562.614   6
 -24   2  -8 3141.85 515.017   6
  22 -24  -8 3515.22 539.129   5
   2  22  -5 4404.46 529.451   4
 -22  -2  -5 4099.10 599.922   6
 -24   2  -5 5344.37 623.448   6
  -2  24  -5 4922.48 590.244   4
   2  22  -2 4637.54 1178.89   1
 -24   2  -2 3824.41 710.116   3
  -2  24  -2 4538.95 1156.44   1
 -22  -2  -2 4424.21 715.254   3
   2  22  -2 4162.22 497.023   4
  -2  24  -2 4620.19 519.036   4
 -22  -2  -2 4756.80 744.020   5
  -2  24  -2 6371.47 1751.81   2
   2  22   1 31664.1 2477.76   1
 -24   2   1 32519.8 1639.99   3
 -22  -2   1 33333.1 1663.73   3
 -24   2   4 3531.52 807.854   3
 -22  -2   4 4445.14 866.239   3
 -24   2   7 1972.56 543.052   3
 -22  -2   7 1998.80 581.293   3
  -3  24  -9 1448.06 403.796   4
 -21  -3  -9 779.594 399.896   6
 -24   3  -9 1060.57 398.713   6
  -3  24  -9 769.666 396.996   6
   3  21  -9 1232.05 339.755   4
  21 -24  -6 5395.72 770.958   5
   3  21  -6 4980.27 550.341   4
  -3  24  -6 6197.09 647.936   4
 -24   3  -6 5746.41 661.528   6
 -21  -3  -6 5895.62 686.959   6
   3  21  -3 41187.1 2865.78   1
   3  21  -3 39733.0 1378.36   4
  -3  24  -3 38673.5 1410.17   4
  -3  24  -3 40383.5 2810.76   1
 -21  -3  -3 38995.9 1461.28   6
  -3  24  -3 40684.6 3694.33   2
 -21  -3  -3 42280.3 1794.70   5
 -24   3   0 6972.10 857.704   3
  -3  24   0 7331.58 1350.82   1
   3  21   0 8482.12 1550.47   1
 -21  -3   0 6656.66 834.101   5
 -24   3   3 10112.5 1028.17   3
 -21  -3   3 9022.10 1005.54   3
 -24   3   6 16727.5 1156.86   3
 -21  -3   6 16617.1 1177.44   3
   4  20 -10 1039.14 284.402   4
 -24   4 -10 1260.33 312.105   6
  -4  24 -10 952.022 327.327   4
  -4  24 -10 1502.39 317.527   6
 -20  -4 -10 1245.17 313.095   6
  24 -20  -7 4386.61 635.285   5
   4  20  -7 4715.04 564.062   4
  -4  24  -7 4782.22 625.112   4
 -20  -4  -7 5827.89 696.056   6
 -24   4  -7 5090.33 629.060   6
  20 -24  -7 4582.83 730.891   5
 -20  -4  -4 1987.21 505.500   6
  -4  24  -4 2541.37 547.537   4
 -24   4  -4 1848.68 468.550   6
  -4  24  -4 3107.93 1101.82   1
 -20  -4  -4 1383.05 626.817   5
   4  20  -4 1715.53 402.098   4
   4  20  -1 16810.3 1848.33   1
  -4  24  -1 17647.5 1816.14   1
 -20  -4  -1 17606.0 1160.07   5
 -24   4  -1 17452.9 1219.50   3
  -4  24  -1 16943.5 2247.07   2
   4  20   2 12583.9 1747.11   1
 -20  -4   2 14625.4 1083.60   5
 -24   4   2 15534.7 1168.76   3
 -20  -4   2 14280.9 1178.83   3
 -24   4   5 991.871 681.634   3
 -20  -4   5 1542.92 652.193   3
   5  19  -8 1437.79 407.678   4
  -5  24  -8 2410.47 542.746   4
 -19  -5  -8 2604.91 587.571   6
 -24   5  -8 2690.82 530.237   6
  19 -24  -8 2913.26 597.489   5
  19 -24  -5 6193.81 810.746   5
   5  19  -5 8096.21 651.048   4
  -5  24  -5 8696.41 744.340   4
 -19  -5  -5 7875.31 741.972   6
 -24   5  -5 7640.81 678.550   6
 -19  -5  -5 7847.35 821.658   5
  -5  24  -2 1595.08 841.015   1
 -19  -5  -2 34.0347 393.377   6
   5  19  -2-509.904 1034.19   1
 -19  -5  -2 927.573 538.642   5
  -5  24  -2-338.182 1132.45   2
 -19  -5   1 10634.4 952.245   5
 -24   5   1 9402.63 922.032   3
   5  19   1 11047.2 1541.80   1
 -24   5   4 5250.44 819.795   3
 -19  -5   4 6575.02 898.298   3
 -24   5   7 5804.10 756.906   3
   6  18  -9-86.4303 339.798   4
 -18  -6  -9 25.6055 393.812   6
 -24   6  -9-129.792 393.257   6
  -6  24  -9 893.097 470.048   6
  -6  24  -9 17.7003 399.441   4
  18 -24  -6 1711.15 660.484   5
   6  18  -6 2823.35 525.522   4
  -6  24  -6 2482.03 606.589   4
 -18  -6  -6 2524.16 603.115   6
 -24   6  -6 1614.49 509.253   6
  -6  24  -3 25040.1 1122.87   4
  -6  24  -3 23318.6 2103.35   1
 -18  -6  -3 24501.8 1131.93   6
 -18  -6  -3 23160.6 1310.99   5
   6  18  -3 23516.0 2229.14   1
   6  18   0 23263.5 2063.93   1
 -18  -6   0 22131.6 1260.89   5
 -24   6   0 21091.0 1309.21   3
 -24   6   3 10560.3 1019.33   3
 -24   6   6 26527.9 1456.95   3
 -18  -6   6 28071.5 1490.33   3
   7  17 -10 413.433 259.562   4
 -24   7 -10 358.778 318.620   6
  -7  24 -10 924.078 359.885   6
 -17  -7 -10 1130.55 344.989   6
  -7  24 -10 695.439 344.711   4
   7  17  -7 20002.6 1005.32   4
  -7  24  -7 17701.6 1032.01   4
 -17  -7  -7 20009.9 1135.60   6
 -24   7  -7 18646.2 1032.79   6
  17 -24  -7 19799.3 1187.72   5
  -7  24  -4 31161.0 1332.29   4
 -17  -7  -4 30591.8 1325.56   6
  -7  24  -4 31276.7 3112.79   2
 -17  -7  -4 30911.4 1482.62   5
  17 -24  -4 30427.7 1559.41   5
   7  17  -4 31735.6 2649.61   1
 -24   7  -1 3348.23 645.271   3
   7  17  -1 2336.38 1027.26   1
 -17  -7  -1 2919.90 606.884   5
 -17  -7  -1 2888.56 525.255   6
  -7  24  -1 4482.97 1413.59   2
   7  17   2 18868.7 1906.62   1
 -17  -7   2 19607.8 1149.78   5
 -24   7   2 20004.0 1247.10   3
 -24   7   5 4414.29 788.610   3
 -17  -7   5 4749.70 777.625   3
   8  16  -8 11464.8 768.765   4
  -8  24  -8 12713.4 882.433   4
 -24   8  -8 12931.7 862.426   6
  16 -24  -8 13068.2 940.633   5
 -16  -8  -8 13504.4 911.238   6
  -8  24  -5 26164.6 1241.57   4
 -24   8  -5 25196.8 1152.54   6
 -16  -8  -5 24770.0 1337.51   5
  16 -24  -5 24553.5 1414.44   5
 -16  -8  -5 27000.8 1286.01   6
  16 -24  -2 3951.27 729.899   5
   8  16  -2 4152.68 1223.53   1
 -16  -8  -2 5876.50 624.745   6
 -16  -8  -2 4372.52 684.805   5
  -8  24  -2 3942.37 1354.27   2
   8  16   1 7400.81 1285.86   1
 -24   8   1 5599.55 787.132   3
 -16  -8   1 5741.30 729.104   5
 -24   8   4 3587.33 691.142   3
 -24   8   7 8809.15 868.761   3
   9  15  -9 1022.32 388.108   4
  -9  24  -9 683.566 424.359   4
 -15  -9  -9 1729.11 462.770   6
 -24   9  -9 248.321 414.136   6
  -9  24  -9 161.524 505.025   6
  -9  24  -6 11245.8 849.758   4
 -15  -9  -6 9946.42 894.706   6
 -24   9  -6 10958.2 820.471   6
  15 -24  -6 9143.59 922.131   5
  15 -24  -3 8058.18 884.885   5
  -9  24  -3 10414.0 762.369   4
 -24   9  -3 8323.64 1701.36   2
 -15  -9  -3 10834.4 809.164   6
 -15  -9  -3 9500.89 859.543   5
  -9  24  -3 10904.5 1862.14   2
   9  15  -3 10417.8 1605.88   1
 -15  -9   0 11762.5 917.392   5
 -24   9   0 12657.3 980.707   3
  15 -24   0 11691.7 893.867   5
   9  15   0 14053.1 1634.05   1
 -15  -9   3 19528.5 1128.78   5
 -24   9   3 17803.4 1222.77   3
 -24   9   6 1410.59 622.483   3
  10  14 -10 313.847 271.071   4
 -10  24 -10 654.193 353.807   4
 -14 -10 -10 1151.17 350.644   6
 -24  10 -10 978.981 364.238   6
 -10  24 -10 1192.68 420.401   6
 -14 -10  -7 1657.90 608.861   6
 -24  10  -7 1849.03 544.358   6
 -10  24  -7 1264.70 486.556   4
  14 -24  -7 1889.97 634.429   5
  14 -24  -4 1625.12 625.786   5
 -24  10  -4 2067.84 1104.75   2
 -14 -10  -4 1886.98 526.997   6
 -10  24  -4 2363.10 529.713   4
  10  14  -4 2038.98 1166.00   1
 -14 -10  -4 1767.43 565.691   5
 -10  24  -4 3149.19 1428.71   2
  14 -24  -1 3958.64 675.945   5
  10  14  -1 3283.27 1048.98   1
 -14 -10  -1 5462.97 592.973   6
 -14 -10  -1 4419.71 645.213   5
 -10  24  -1 3962.67 1259.65   2
 -24  10  -1 2634.02 1304.80   2
 -24  10   2 5959.64 788.623   3
  10  14   2 6398.90 1218.26   1
 -14 -10   2 6222.70 743.936   5
 -10  24   2 7253.08 838.448   3
 -24  10   5 6422.51 826.135   3
 -14 -10   5 5979.50 833.128   3
 -11  24  -8 2360.02 525.543   4
 -13 -11  -8 3120.07 602.253   6
 -24  11  -8 2899.32 561.072   6
  13 -24  -8 3012.97 605.118   5
 -11  24  -5 30276.9 1305.80   4
 -13 -11  -5 28900.1 1313.17   6
 -24  11  -5 26252.5 1181.81   6
 -13 -11  -5 29608.5 1413.13   5
  13 -24  -5 27262.0 1509.18   5
  13 -24  -2 1635.16 564.803   5
 -24  11  -2 1083.94 963.701   2
 -13 -11  -2 2061.41 479.328   6
  11  13  -2 2168.96 1006.17   1
 -13 -11  -2 1745.73 550.802   5
 -11  24  -2 2309.03 1169.11   2
 -24  11   1 1918.87 573.532   3
  11  13   1 1918.58 871.233   1
 -11  24   1 2069.13 589.186   3
 -13 -11   1 2287.25 567.101   5
 -24  11   4 189.020 569.782   3
  13 -24   4 852.537 566.481   7
 -11  24   4 762.789 590.439   3
 -24  11   7 4360.27 705.346   3
 -12  24  -9 1525.33 439.425   4
 -12  24  -9 1608.62 555.999   6
 -24  12  -9 1941.81 490.544   6
 -12 -12  -9 1964.48 455.801   6
 -12 -12  -6 8539.99 823.180   6
 -24  12  -6 7261.08 704.307   6
 -12  24  -6 7185.43 695.669   4
  12 -24  -6 9306.75 963.313   5
 -12 -12  -6 7028.00 752.893   5
 -12  24  -3 17781.3 946.890   4
 -24  12  -3 13809.1 1936.19   2
 -12 -12  -3 17640.2 947.556   6
  24 -12  -3 14476.9 2101.89   1
 -12 -12  -3 15119.9 1010.71   5
  12 -24  -3 17398.6 1152.09   5
  12  12  -3 15253.0 1905.41   1
 -12  24  -3 15836.6 2095.75   2
  12  12   0-523.182 832.351   1
 -24  12   0 188.906 521.540   3
 -24  12   0 1335.36 1135.27   2
 -12 -12   0-162.567 392.292   6
 -12  24   0 763.755 493.672   3
 -12 -12   0-520.387 467.923   5
  12 -24   0 18.4318 469.177   5
  12 -24   3 15465.4 1329.06   7
 -12  24   3 18327.2 1227.58   3
 -24  12   3 15778.6 1126.07   3
 -24  12   6 8341.08 892.055   3
 -12  24   6 9407.78 906.285   3
 -24  13 -10 902.744 381.837   6
 -13  24 -10 598.332 396.074   6
 -13  24 -10 587.663 303.506   4
 -11 -13 -10 1056.84 317.704   6
 -11 -13  -7 5459.23 716.497   6
 -24  13  -7 3506.71 595.601   6
 -13  24  -7 3916.25 584.750   4
  11 -24  -7 4926.94 724.607   5
 -24  13  -4-211.717 872.654   2
 -11 -13  -4 315.653 471.042   6
 -13  24  -4 219.268 416.730   4
  13  11  -4-407.156 877.878   1
 -11 -13  -4 52.3654 513.824   5
 -13  24  -4 2262.71 1240.87   2
  11 -24  -4-64.8898 594.253   5
  24 -11  -4-214.256 1216.27   1
 -24  13  -1 1530.88 1031.03   2
  24 -11  -1 787.496 1026.88   1
  13  11  -1 2083.05 990.324   1
 -13  24  -1 1921.23 541.233   3
 -11 -13  -1 2162.23 558.445   5
 -13  24  -1 1174.54 860.186   2
 -11 -13  -1 2095.76 451.490   6
  11 -24  -1 2385.20 610.290   5
 -24  13   2 1499.13 560.711   3
  11 -24   2 1972.04 655.666   7
 -11 -13   2 1390.74 508.719   5
 -13  24   2 1400.40 561.955   3
 -24  13   5 30504.2 1560.37   3
  11 -24   5 31926.8 2093.22   7
 -13  24   5 29451.3 1526.47   3
 -14  24  -8 812.819 412.212   4
 -10 -14  -8 1240.10 487.788   6
 -24  14  -8 736.348 478.684   6
 -14  24  -8 470.525 612.666   6
  10 -24  -8 77.9401 465.746   5
 -10 -14  -5 5374.91 690.651   6
 -14  24  -5 5705.12 636.837   4
 -24  14  -5 4912.09 593.627   6
 -10 -14  -5 5946.81 738.414   5
  10 -24  -5 5258.08 813.794   5
 -24  14  -2 6548.32 1556.15   2
  14  10  -2 5403.42 1304.75   1
  24 -10  -2 5139.58 1379.18   1
 -10 -14  -2 5643.88 688.170   5
 -10 -14  -2 6697.22 632.029   6
 -14  24  -2 5752.63 1308.20   2
  10 -24  -2 5670.43 758.189   5
 -24  14   1 4122.97 640.931   3
  14  10   1 4845.66 1080.66   1
  10 -24   1 4742.65 806.795   7
 -10 -14   1 4998.93 528.059   6
 -10 -14   1 3862.45 618.059   5
 -14  24   1 4654.21 713.189   3
 -24  14   4 2292.98 661.758   3
  10 -24   4 2776.71 757.778   7
 -10 -14   4 2232.94 708.552   7
 -14  24   4 2051.86 630.048   3
 -24  14   7 1566.21 598.736   3
 -15  24  -9 1985.15 427.462   4
 -24  15  -9 2305.71 511.410   6
 -15  24  -9 1995.35 573.754   6
  -9 -15  -9 2919.36 459.010   6
  -9 -15  -6 1228.80 510.917   6
 -24  15  -6-650.527 501.663   6
  -9 -15  -6 910.976 504.397   5
 -15  24  -6 646.065 437.374   4
   9 -24  -6 1544.32 670.287   5
 -15  24  -3 19568.4 1007.70   4
  -9 -15  -3 19883.4 1005.39   6
  -9 -15  -3 17293.0 1078.89   5
 -15  24  -3 17743.9 2189.07   2
  24  -9  -3 17331.8 2291.80   1
 -24  15  -3 19208.4 2154.79   2
  15   9  -3 20472.7 2240.20   1
   9 -24  -3 19355.5 1249.97   5
  -9 -15   0 14645.3 815.589   6
 -15  24   0 12681.8 947.576   3
  -9 -15   0 13707.0 949.691   5
 -24  15   0 12947.2 935.245   3
 -24  15   0 14073.0 1972.32   2
   9 -24   0 12028.6 945.579   5
  15   9   0 11617.1 1579.80   1
   9 -24   3 9605.05 1133.99   7
  -9 -15   3 7682.51 1077.06   7
 -24  15   3 9572.85 913.894   3
 -15  24   3 9999.11 917.388   3
 -15  24   6 9953.98 929.067   3
 -24  15   6 9642.91 955.629   3
 -16  24 -10 778.897 289.897   4
  -8 -16 -10 490.060 242.743   6
 -24  16 -10 1525.56 394.373   6
 -16  24 -10 950.225 408.950   6
 -16  24  -7 8007.84 726.224   4
  -8 -16  -7 9201.90 761.078   6
 -24  16  -7 7749.15 721.520   6
 -16  24  -7 7840.80 851.601   6
  -8 -16  -7 7507.22 727.675   5
   8 -24  -7 8641.12 860.157   5
 -16  24  -4 5202.78 1498.19   2
 -24  16  -4 4871.83 1421.58   2
  16   8  -4 3558.72 1375.98   1
 -16  24  -4 4623.04 589.672   4
  24  -8  -4 2232.40 1345.02   1
  -8 -16  -4 3918.34 575.084   6
  -8 -16  -4 3966.20 691.814   5
   8 -24  -4 6244.86 890.061   5
 -16  24  -1 4436.22 1124.28   2
 -24  16  -1 5022.68 1300.42   2
  -8 -16  -1 6446.64 591.893   6
  16   8  -1 6873.18 1455.33   1
  24  -8  -1 7452.40 1386.80   1
 -16  24  -1 6052.55 712.119   3
  -8 -16  -1 6334.87 725.180   5
   8 -24  -1 5728.23 768.109   5
 -24  16   2 5299.53 772.707   3
   8 -24   2 5659.09 891.809   7
  -8 -16   2 5774.95 659.560   5
 -16  24   2 4627.84 742.768   3
 -16  24   5 25971.9 1406.27   3
 -24  16   5 26361.1 1479.55   3
 -24  16   8 14399.6 933.916   3
 -17  24  -8 7373.31 643.776   4
  -7 -17  -8 6705.03 621.336   6
 -24  17  -8 6337.44 694.308   6
 -17  24  -8 7219.00 799.511   6
   7 -24  -8 5734.23 622.194   5
  -7 -17  -5 4637.43 622.446   6
 -17  24  -5 4564.91 585.186   4
 -24  17  -5 4825.23 582.387   6
  -7 -17  -5 4197.74 690.912   5
   7 -24  -5 3661.30 768.943   5
  -7 -17  -2 20584.6 981.927   6
  24  -7  -2 19182.5 2332.12   1
 -17  24  -2 17250.2 2019.31   2
 -24  17  -2 17407.6 2074.78   2
  17   7  -2 19094.2 2118.25   1
  -7 -17  -2 19287.2 1133.56   5
   7 -24  -2 21019.4 1228.95   5
 -24  17   1 3160.09 651.987   3
  -7 -17   1 3802.88 626.504   5
 -17  24   1 3324.39 672.359   3
   7 -24   4 32948.2 2133.86   7
  -7 -17   4 31599.7 2122.59   7
 -17  24   4 29050.4 1529.42   3
 -24  17   4 31895.8 1601.10   3
 -17  24   7 20016.8 1166.81   3
 -24  17   7 19442.1 1222.81   3
  -6 -18  -9 617.384 317.018   6
 -24  18  -9 902.656 440.852   6
 -18  24  -9 1022.81 508.080   6
 -18  24  -6 25669.4 1152.16   4
  -6 -18  -6 25519.1 1172.89   6
 -24  18  -6 23792.4 1162.82   6
  -6 -18  -6 24296.0 1290.73   5
   6 -24  -6 25698.2 1401.29   5
 -18  24  -3 9372.55 1739.62   2
 -18  24  -3 11162.1 759.787   4
 -24  18  -3 8469.10 1605.61   2
  18   6  -3 9917.04 1714.41   1
  -6 -18  -3 10566.5 745.478   6
  -6 -18  -3 9692.99 877.543   5
  24  -6  -3 10552.0 1992.96   1
   6 -24  -3 9940.14 981.008   5
 -24  18   0 19961.6 2094.49   2
  -6 -18   0 25361.5 1070.14   6
 -18  24   0 23667.8 1257.74   3
 -24  18   0 23107.9 1241.75   3
  -6 -18   0 24649.3 1260.84   5
   6 -24   0 23694.4 1282.58   5
  18   6   0 21058.5 2065.23   1
   6 -24   3 26189.5 1840.33   7
  -6 -18   3 25267.5 1864.92   7
 -18  24   3 22422.9 1346.57   3
 -24  18   3 23017.2 1326.97   3
 -18  24   6 2733.19 625.645   3
 -24  18   6 2449.43 669.652   3
 -24  19 -10 6459.11 497.907   6
 -19  24 -10 5331.43 496.323   6
 -19  24  -7 4027.20 504.938   4
  -5 -19  -7 4467.53 593.859   6
 -24  19  -7 3921.57 599.790   6
 -19  24  -7 4384.93 688.955   6
  -5 -19  -7 4032.97 582.352   5
   5 -24  -7 4248.14 661.963   5
 -19  24  -4 6505.55 1634.00   2
 -24  19  -4 8014.86 1750.07   2
  19   5  -4 7064.64 1748.22   1
  -5 -19  -4 5616.80 624.248   6
 -19  24  -4 7051.88 662.491   4
   5 -24  -4 6883.80 619.647   6
  24  -5  -4 6617.28 1883.85   1
  -5 -19  -4 5900.18 740.554   5
   5 -24  -4 7408.05 952.740   5
 -19  24  -1 10185.2 1598.14   2
 -24  19  -1 10043.6 1650.33   2
  19   5  -1 7765.30 1404.55   1
 -19  24  -1 9188.44 784.756   3
 -24  19  -1 10623.9 864.442   3
  -5 -19  -1 10776.8 922.223   5
   5 -24  -1 9547.66 900.681   5
  -5 -19  -1 10835.1 703.179   6
  24  -5  -1 9817.98 1597.38   1
 -24  19   2 148.405 565.838   3
   5 -24   2-292.094 577.721   7
 -19  24   2 79.4027 587.395   3
 -24  19   5 7644.28 927.311   3
 -19  24   5 7108.80 868.352   3
 -24  19   8 2162.60 523.731   3
  -4 -20  -8 2968.37 449.828   6
 -24  20  -8 2559.12 502.753   6
   4 -24  -8 3531.17 521.025   5
   4 -24  -5 1119.86 401.515   6
  -4 -20  -5 1210.13 474.116   6
 -24  20  -5 1795.27 477.249   6
  -4 -20  -5 1138.98 620.879   5
   4 -24  -5 1702.42 662.178   5
 -20  24  -5 1533.39 425.813   4
 -20  24  -2 13894.3 1922.09   2
 -24  20  -2 11368.2 1760.83   2
  20   4  -2 14841.2 1931.45   1
  -4 -20  -2 15108.6 1050.85   5
   4 -24  -2 14726.2 1080.20   5
  -4 -20  -2 15334.9 847.045   6
  24  -4  -2 14041.9 2002.23   1
 -20  24   1 16908.8 1130.48   3
 -24  20   1 16149.3 1085.63   3
  -4 -20   1 18695.9 1088.10   5
   4 -24   1 16638.9 1086.69   5
 -24  20   4 2577.40 692.685   3
 -20  24   4 1211.92 601.751   3
 -20  24   7 4220.70 661.594   3
 -24  20   7 4581.45 693.718   3
 -24  21  -9 6307.98 590.702   6
 -21  24  -9 7355.49 621.563   6
 -21  24  -6 14491.7 1025.55   6
  -3 -21  -6 13376.8 987.179   5
   3 -24  -6 12788.2 1033.30   5
  -3 -21  -6 13963.1 850.292   6
 -24  21  -6 15712.0 946.697   6
   3 -24  -3 9775.50 710.653   6
 -21  24  -3 9675.37 1815.82   2
 -24  21  -3 7563.66 1606.10   2
  21   3  -3 7938.35 1660.31   1
  -3 -21  -3 10556.9 912.474   5
  -3 -21  -3 8634.92 701.088   6
  24  -3  -3 7632.72 1755.03   1
   3 -24  -3 9389.50 930.814   5
  -3 -21   0 7822.37 841.739   5
 -21  24   0 7422.14 786.759   3
   3 -24   0 6169.27 773.221   5
 -24  21   0 6686.46 769.466   3
   3 -24   3 43399.0 2505.98   7
  -3 -21   3 43141.5 2533.47   7
 -21  24   3 39891.0 1801.31   3
 -24  21   3 39859.1 1795.47   3
 -21  24   6 6095.22 806.551   3
 -24  21   6 6017.88 789.790   3
 -24  22 -10 2335.39 339.509   6
 -22  24 -10 1270.02 302.745   6
  -2 -22  -7 403.537 368.778   6
 -24  22  -7 1761.97 512.907   6
 -22  24  -7 1062.72 531.309   6
  -2 -22  -7 497.845 447.242   5
   2 -24  -7 1111.24 489.195   5
   2 -24  -4 3155.19 494.966   6
  -2 -22  -4 3158.41 517.296   6
 -22  24  -4 3345.80 597.556   6
  -2 -22  -4 3812.78 740.459   5
   2 -24  -4 2735.83 662.175   5
  24  -2  -1 27234.1 2475.62   1
 -22  24  -1 31004.0 1423.93   3
 -22  24  -1 28376.0 2416.36   2
 -24  22  -1 31704.3 1428.99   3
  22   2  -1 24944.1 2360.98   1
  -2 -22  -1 30437.6 1476.67   5
   2 -24  -1 32888.2 1529.21   5
 -24  22  -1 35805.2 2753.34   2
  -2 -22  -1 30678.8 1216.41   6
 -22  24   2 4450.34 717.870   3
 -24  22   2 3840.61 729.935   3
 -22  24   5 3799.58 720.603   3
 -24  22   5 4894.93 792.010   3
 -22  24   8 3497.66 551.493   3
 -24  22   8 3192.31 536.101   3
 -24  23  -8 4656.92 553.727   6
 -23  24  -8 5221.58 599.288   6
   1 -24  -8 4633.21 520.434   5
   1 -24  -5 5346.46 588.158   6
  -1 -23  -5 5631.39 594.854   6
 -24  23  -5 6054.91 651.290   6
 -23  24  -5 5479.98 694.056   6
  -1 -23  -5 5726.81 772.522   5
   1 -24  -5 5447.39 794.711   5
  24  -1  -2 1376.31 1249.00   1
 -23  24  -2 3021.23 1220.91   2
 -24  23  -2 3633.80 1335.28   2
  23   1  -2 1670.33 1149.45   1
  -1 -23  -2 617.842 400.525   6
  -1 -23  -2 654.917 542.449   5
   1 -24  -2 1047.46 542.434   5
 -23  24   1 59671.3 2220.90   3
 -24  23   1 59879.1 2200.56   3
  -1 -23   1 66145.3 2192.40   5
   1 -24   1 65719.7 2205.21   5
 -23  24   4 5183.51 815.669   3
 -24  23   4 4999.92 790.505   3
 -23  24   7 18658.9 1117.82   3
 -24  23   7 18878.7 1121.09   3
 -24  24  -9-922.328 372.425   6
   0 -24  -6 631.409 384.728   6
 -24  24  -6 951.519 474.092   6
   0 -24  -6 1248.04 582.746   5
   0 -24  -3-242.283 433.517   6
   0 -24  -3-474.948 603.170   5
 -24  24   0 18528.8 1158.45   3
   0 -24   0 20813.7 1248.82   5
 -24  24   3 144.133 578.231   3
 -24  24   6 809.898 564.960   3
  25 -25  -7-626.937 466.619   5
   0  25  -7 285.390 363.360   4
 -25   0  -7-194.119 368.086   6
   0  25  -4 14112.5 820.946   4
 -25   0  -4 13760.6 843.539   6
 -25   0  -1-148.991 583.216   3
   0  25  -1-186.642 324.561   4
 -25   0   2 39360.3 1902.78   3
 -25   0   5 263.175 640.155   3
   1  24  -8-36.2108 319.149   4
  -1  25  -8 79.4783 337.300   4
 -25   1  -8 466.490 376.003   6
 -24  -1  -8 95.2050 350.650   6
  24 -25  -8 337.870 376.693   5
  25 -24  -8 810.378 404.388   5
  24 -25  -5 604.063 599.919   5
   1  24  -5 518.775 365.639   4
  -1  25  -5 123.345 398.927   4
 -24  -1  -5 1277.51 457.557   6
 -25   1  -5 376.150 390.595   6
 -25   1  -2 5085.40 763.808   3
 -24  -1  -2 4739.53 777.469   3
   1  24  -2 5957.75 560.227   4
  -1  25  -2 4996.75 543.449   4
 -25   1   1 34993.1 1749.82   3
 -24  -1   1 35963.8 1772.55   3
 -25   1   4 9099.96 1045.35   3
 -24  -1   4 7766.82 951.199   3
 -25   1   7 1301.61 530.281   3
 -24  -1   7 1666.76 497.077   3
  -2  25  -9 1082.88 332.503   4
 -23  -2  -9 1906.57 383.802   6
 -25   2  -9 1500.33 354.587   6
  -2  25  -9 985.887 343.365   6
   2  23  -9 1344.32 303.687   4
  23 -25  -6 6184.05 796.446   5
   2  23  -6 6273.06 578.817   4
 -23  -2  -6 7341.71 682.265   6
 -25   2  -6 6770.62 657.685   6
  -2  25  -6 6423.83 628.301   4
   2  23  -3 3107.38 481.459   4
  -2  25  -3 3468.91 528.402   4
 -23  -2  -3 2440.49 662.881   5
 -23  -2   0 9301.03 1008.99   3
 -25   2   0 7289.66 908.124   3
  -2  25   0 7612.68 1381.62   1
   2  23   0 9145.39 1592.27   1
 -23  -2   0 8243.06 922.450   5
 -23  -2   3 39943.2 1942.39   3
 -25   2   3 42122.0 1934.17   3
 -25   2   6 6107.00 816.783   3
 -23  -2   6 5370.86 789.718   3
  -3  25 -10 698.757 249.365   4
 -22  -3 -10 989.029 248.374   6
 -25   3 -10 980.269 254.426   6
  25 -22  -7 5074.17 651.748   5
   3  22  -7 5029.83 541.674   4
  -3  25  -7 5501.76 588.974   4
 -22  -3  -7 5179.68 624.500   6
 -25   3  -7 5294.72 610.476   6
  22 -25  -7 4802.10 677.763   5
   3  22  -4 8904.81 692.755   4
  -3  25  -4 9701.42 740.994   4
 -22  -3  -4 8421.10 722.620   6
 -22  -3  -4 9346.16 923.301   5
   3  22  -1 45561.4 3036.18   1
  -3  25  -1 45154.3 3004.55   1
  -3  25  -1 44080.0 3548.21   2
 -22  -3  -1 44174.0 1903.80   5
 -25   3  -1 46664.8 1944.48   3
 -22  -3  -1 49132.3 2004.33   3
 -25   3   2 8408.68 978.794   3
 -22  -3   2 6793.27 919.141   3
 -25   3   5 3951.75 803.745   3
 -22  -3   5 3749.67 784.719   3
   4  21  -8 178.071 328.898   4
  -4  25  -8 633.953 415.212   4
 -21  -4  -8 944.776 483.564   6
 -25   4  -8 327.346 392.628   6
  21 -25  -8 861.865 466.645   5
  21 -25  -5-762.028 718.357   5
   4  21  -5-61.6704 400.980   4
  -4  25  -5 287.040 428.480   4
 -21  -4  -5 181.792 460.387   6
 -25   4  -5 618.789 449.323   6
 -21  -4  -5 253.765 542.708   5
  -4  25  -2 7265.79 627.348   4
  -4  25  -2 7826.57 1401.02   1
 -21  -4  -2 6632.44 844.764   5
  -4  25  -2 7798.96 1858.39   2
   4  21  -2 5634.38 1346.41   1
   4  21   1 106258. 4672.67   1
 -21  -4   1 98416.9 3070.43   5
 -25   4   1 103234. 3152.58   3
 -25   4   4 16924.5 1250.33   3
 -21  -4   4 16969.4 1283.72   3
 -25   4   7 8409.86 796.721   3
   5  20  -9 5094.49 455.524   4
 -20  -5  -9 5436.78 538.251   6
  -5  25  -9 4588.49 508.291   4
 -25   5  -9 5407.59 514.107   6
  -5  25  -9 4170.28 560.971   6
  20 -25  -6 1642.47 615.486   5
   5  20  -6 1684.30 447.509   4
 -20  -5  -6 1673.55 536.511   6
 -25   5  -6 1457.49 478.775   6
  -5  25  -6 1679.39 542.442   4
  -5  25  -3 11136.9 769.453   4
 -20  -5  -3 12382.7 840.778   6
  -5  25  -3 11922.4 1665.76   1
 -20  -5  -3 11989.4 1037.72   5
   5  20  -3 11851.0 1719.16   1
  -5  25  -3 13993.0 2390.64   2
   5  20   0 43750.0 2904.47   1
 -20  -5   0 45690.0 1881.88   5
 -25   5   0 46785.1 1933.24   3
 -25   5   3 3816.92 769.744   3
 -20  -5   3 4714.76 820.667   3
 -25   5   6 12771.0 1045.28   3
 -20  -5   6 11824.5 986.621   3
  -6  25 -10 769.569 324.382   4
 -19  -6 -10 956.037 297.059   6
 -25   6 -10 823.531 289.500   6
  -6  25 -10 996.270 308.579   6
   6  19  -7 7978.36 670.142   4
  -6  25  -7 8074.43 747.456   4
 -19  -6  -7 9315.58 800.052   6
 -25   6  -7 7454.36 667.100   6
  19 -25  -7 8328.84 846.636   5
  19 -25  -4 333.902 609.974   5
 -19  -6  -4 448.084 474.128   6
  -6  25  -4 1287.77 495.725   4
 -19  -6  -4 1416.94 612.592   5
   6  19  -1 44015.9 3030.84   1
  -6  25  -1 47973.6 3485.24   2
 -19  -6  -1 42826.4 1815.38   5
 -25   6  -1 44477.6 1854.57   3
   6  19   2 3105.47 1081.48   1
 -25   6   2 3200.57 716.633   3
 -19  -6   2 4233.04 720.052   5
 -25   6   5 56807.6 2260.71   3
 -19  -6   5 62263.0 2335.83   3
   7  18  -8 13504.9 767.658   4
  -7  25  -8 12306.9 858.982   4
 -18  -7  -8 14348.7 900.265   6
 -25   7  -8 13575.0 817.739   6
  18 -25  -8 14762.7 933.050   5
  -7  25  -5 47475.7 1701.35   4
 -18  -7  -5 46256.1 1695.18   6
 -25   7  -5 44864.6 1583.04   6
  18 -25  -5 48467.0 1957.52   5
 -18  -7  -5 47343.0 1842.58   5
 -18  -7  -2 13963.1 879.711   6
  -7  25  -2 14555.6 1659.98   1
   7  18  -2 14216.5 1818.47   1
 -18  -7  -2 13891.2 1054.33   5
  18 -25  -2 13071.4 1042.48   5
  -7  25  -2 13135.1 2122.01   2
 -25   7   1 1737.11 644.232   3
   7  18   1 1756.78 944.873   1
 -18  -7   1 1637.81 618.203   5
 -25   7   4 1066.86 688.210   3
 -18  -7   4 870.271 628.323   3
 -25   7   7 8583.25 852.492   3
   8  17  -9 957.954 330.133   4
  -8  25  -9 93.1240 399.704   4
 -17  -8  -9 1369.93 421.004   6
 -25   8  -9 850.616 397.825   6
  -8  25  -9 305.915 444.942   6
  -8  25  -6 20571.1 1124.07   4
 -17  -8  -6 22059.2 1184.40   6
 -25   8  -6 20756.9 1058.42   6
  17 -25  -6 20263.7 1293.48   5
  -8  25  -3 31734.7 1281.02   4
 -17  -8  -3 27883.3 1239.02   6
  -8  25  -3 32399.2 3030.71   2
 -17  -8  -3 27398.7 1438.19   5
  17 -25  -3 29235.2 1526.16   5
   8  17  -3 27184.7 2479.85   1
  17 -25   0 2486.04 548.239   5
 -25   8   0 2368.96 623.953   3
   8  17   0 3397.83 1110.26   1
 -17  -8   0 2731.64 653.043   5
 -17  -8   3 9682.56 909.319   5
 -25   8   3 10375.1 969.517   3
 -25   8   6 1727.89 661.914   3
 -17  -8   6 1070.44 587.741   3
  -9  25 -10 429.295 327.366   4
 -16  -9 -10 367.355 285.343   6
 -25   9 -10 242.483 290.182   6
  -9  25 -10 63.1790 321.225   6
  -9  25  -7 15991.2 992.012   4
 -16  -9  -7 19159.8 1076.20   6
 -25   9  -7 17733.9 987.544   6
  16 -25  -7 17408.8 1148.32   5
   9  16  -4 7931.07 1495.01   1
 -25   9  -4 6134.47 1688.86   2
 -16  -9  -4 10098.4 796.772   6
  -9  25  -4 8930.62 731.305   4
  16 -25  -4 7916.30 978.337   5
 -16  -9  -4 8814.19 866.673   5
  -9  25  -4 9025.47 1845.01   2
 -16  -9  -1 20408.9 1020.26   6
  -9  25  -1 17938.2 2156.70   2
 -16  -9  -1 18126.1 1138.28   5
 -25   9  -1 18814.7 1175.74   3
  16 -25  -1 19870.7 1212.01   5
   9  16  -1 17813.8 1894.86   1
 -25   9   2 7690.22 845.985   3
 -16  -9   2 7372.89 806.499   5
   9  16   2 6568.10 1319.32   1
 -25   9   5 7301.58 896.039   3
 -16  -9   5 6300.94 868.968   3
 -10  25  -8 164.453 445.734   4
 -15 -10  -8 1477.50 538.106   6
 -25  10  -8 1438.70 502.901   6
  15 -25  -8 877.230 503.070   5
 -10  25  -5 9521.41 780.613   4
 -15 -10  -5 9479.66 829.668   6
 -25  10  -5 9380.83 732.551   6
 -15 -10  -5 10307.8 925.381   5
  15 -25  -5 8648.11 922.353   5
  15 -25  -2 1031.58 597.275   5
  10  15  -2 1039.34 1107.78   1
 -25  10  -2 1229.91 1235.23   2
 -15 -10  -2 705.948 443.967   6
 -15 -10  -2 1125.72 551.785   5
 -10  25  -2 2160.09 1169.11   2
  10  15   1 14452.2 1704.44   1
 -15 -10   1 15566.1 1031.77   5
 -25  10   1 13590.1 1046.30   3
 -25  10   4 4348.05 779.893   3
 -25  10   7 10473.3 914.229   3
 -11  25  -9 1611.22 441.716   4
 -14 -11  -9 2067.92 442.411   6
 -25  11  -9 1172.49 425.708   6
 -11  25  -9 1861.98 555.912   6
 -14 -11  -6 7618.62 792.001   6
 -11  25  -6 6660.00 712.174   4
 -25  11  -6 7025.17 679.391   6
 -14 -11  -6 5855.25 695.697   5
  14 -25  -6 6900.68 878.513   5
  14 -25  -3 5029.32 803.380   5
 -11  25  -3 7199.13 670.308   4
 -25  11  -3 5403.75 1473.02   2
 -14 -11  -3 6576.93 695.305   6
 -14 -11  -3 5076.37 730.925   5
  11  14  -3 4720.09 1288.55   1
 -11  25  -3 2915.59 1421.48   2
  14 -25   0-543.809 492.795   5
 -25  11   0 634.605 548.763   3
  11  14   0-496.365 899.506   1
 -14 -11   0 309.399 512.976   5
 -14 -11   0-185.484 411.402   6
 -11  25   3 12637.9 1075.51   3
 -14 -11   3 11010.6 922.754   5
 -25  11   3 9175.90 937.031   3
 -25  11   6 1386.02 601.295   3
 -13 -12 -10 1878.81 335.866   6
 -25  12 -10 2343.26 389.601   6
 -12  25 -10 1615.66 416.939   6
 -12  25 -10 2400.45 375.131   4
 -12  25  -7 8421.91 732.253   4
 -13 -12  -7 9058.05 843.801   6
 -25  12  -7 7302.70 704.751   6
  13 -25  -7 8915.20 879.357   5
 -25  12  -4 2812.70 1301.91   2
  25 -13  -4 2155.47 1301.09   1
 -13 -12  -4 3525.88 615.192   6
 -12  25  -4 3232.02 549.711   4
  12  13  -4 4228.38 1355.51   1
 -13 -12  -4 2291.94 582.255   5
 -12  25  -4 1797.41 1111.19   2
  13 -25  -4 3547.72 735.666   5
  12  13  -1 2276.75 1025.51   1
 -25  12  -1 2989.83 616.561   3
  25 -13  -1 1756.57 1100.40   1
 -13 -12  -1 3077.57 516.021   6
 -25  12  -1 3116.87 1274.15   2
 -13 -12  -1 3036.56 628.752   5
 -12  25  -1 3119.33 1162.81   2
  13 -25  -1 2613.40 608.277   5
 -25  12   2 7742.45 839.418   3
 -12  25   2 7960.49 922.670   3
 -13 -12   2 7963.24 780.843   5
 -12  25   5 9385.43 949.071   3
 -25  12   5 10475.9 1006.86   3
 -25  12   8 1610.07 466.444   3
 -13  25  -8 1462.04 474.653   4
 -12 -13  -8 1981.11 511.677   6
 -25  13  -8 1771.92 494.988   6
 -13  25  -8 1460.64 603.698   6
  12 -25  -8 1458.51 515.629   5
 -13  25  -5 9653.16 803.615   4
 -12 -13  -5 10415.3 863.608   6
 -25  13  -5 9671.98 738.157   6
 -12 -13  -5 10472.0 947.014   5
  12 -25  -5 9181.72 982.969   5
 -25  13  -2 9361.37 1681.77   2
 -12 -13  -2 7201.62 686.789   6
  25 -12  -2 7031.60 1692.01   1
  13  12  -2 7256.98 1394.54   1
 -12 -13  -2 6982.91 767.651   5
 -13  25  -2 6690.97 1455.21   2
  12 -25  -2 7505.64 901.695   5
 -25  13   1 4119.12 687.744   3
 -12 -13   1 3809.93 523.166   6
  13  12   1 1873.63 975.542   1
 -13  25   1 3629.50 685.308   3
 -12 -13   1 2938.10 610.865   5
 -25  13   4 2668.91 690.195   3
  12 -25   4 3509.16 828.802   7
 -13  25   4 3558.82 739.468   3
 -25  13   7 7979.43 853.440   3
 -14  25  -9 836.677 507.276   6
 -14  25  -9 631.027 370.503   4
 -11 -14  -9 1432.93 399.481   6
 -25  14  -9 1888.78 459.231   6
 -11 -14  -6 1985.95 591.116   6
 -14  25  -6 1994.04 506.111   4
 -25  14  -6 1825.61 519.577   6
 -11 -14  -6 1948.65 562.893   5
  11 -25  -6 2842.95 718.765   5
 -11 -14  -3 12339.3 830.734   6
 -14  25  -3 12744.2 820.589   4
 -25  14  -3 12361.7 1899.95   2
  25 -11  -3 7489.70 1736.07   1
  14  11  -3 11507.1 1701.03   1
 -11 -14  -3 9890.84 849.253   5
  11 -25  -3 11746.9 1020.50   5
 -14  25  -3 13690.1 2054.47   2
  14  11   0 111.149 868.310   1
 -25  14   0 237.362 471.539   3
 -11 -14   0-477.983 413.756   6
 -14  25   0 37.8061 482.212   3
 -11 -14   0 306.621 482.092   5
  11 -25   0 91.3502 504.068   5
 -25  14   3 5750.77 779.548   3
  11 -25   3 5803.06 946.042   7
 -14  25   3 5636.04 833.885   3
 -25  14   6 7032.19 857.948   3
 -14  25   6 7471.62 841.231   3
 -10 -15 -10 1038.00 263.694   6
 -25  15 -10 986.623 329.156   6
 -15  25 -10 1645.41 323.046   4
 -15  25  -7 10140.0 758.869   4
 -10 -15  -7 9282.17 791.758   6
 -25  15  -7 11108.5 797.409   6
  10 -25  -7 9787.19 923.591   5
 -25  15  -4 3693.62 1306.27   2
 -10 -15  -4 4267.72 606.810   6
 -15  25  -4 4635.43 620.016   4
  25 -10  -4 5205.86 1843.76   1
  15  10  -4 5945.37 1505.66   1
 -10 -15  -4 4170.08 687.372   5
  10 -25  -4 4695.03 866.883   5
 -15  25  -4 5577.99 1601.54   2
 -15  25  -1 13712.6 1866.65   2
 -15  25  -1 14369.4 958.644   3
  25 -10  -1 14242.8 1974.04   1
 -10 -15  -1 15072.0 877.635   6
 -25  15  -1 15520.5 1023.18   3
 -10 -15  -1 14336.7 980.276   5
 -25  15  -1 16349.0 2141.58   2
  10 -25  -1 14435.3 1068.48   5
  15  10  -1 14001.6 1822.75   1
 -25  15   2 510.859 523.381   3
  10 -25   2 732.752 549.750   7
 -10 -15   2 577.593 489.797   5
 -15  25   2 657.676 559.519   3
 -25  15   5 8884.44 949.859   3
 -15  25   5 10051.7 935.994   3
 -25  15   8 337.933 440.730   3
 -16  25  -8 13251.2 807.889   4
  -9 -16  -8 12151.6 791.935   6
 -25  16  -8 13566.4 846.963   6
 -16  25  -8 13085.6 957.293   6
   9 -25  -8 11875.4 844.795   5
  -9 -16  -5 7598.35 734.245   6
 -16  25  -5 7178.23 698.802   4
 -25  16  -5 5661.64 580.556   6
  -9 -16  -5 6041.18 778.908   5
   9 -25  -5 7921.16 962.988   5
 -16  25  -2 7254.84 1476.89   2
 -25  16  -2 7367.40 1521.31   2
  -9 -16  -2 8578.69 699.236   6
  16   9  -2 8232.10 1551.21   1
  25  -9  -2 7702.09 1822.74   1
  -9 -16  -2 7601.42 765.414   5
   9 -25  -2 8582.88 874.991   5
 -16  25   1 19276.4 1201.39   3
  -9 -16   1 19987.4 1131.61   5
 -25  16   1 18301.6 1165.47   3
  16   9   1 21208.1 1960.65   1
 -25  16   4 8386.81 918.526   3
   9 -25   4 8408.40 1136.36   7
  -9 -16   4 7212.01 1083.99   7
 -16  25   4 8807.21 950.127   3
 -16  25   7 17485.9 1100.96   3
 -25  16   7 19808.2 1189.06   3
 -17  25  -9 9.75284 324.020   4
  -8 -17  -9-125.327 300.845   6
 -25  17  -9 508.555 400.781   6
 -17  25  -9 453.787 480.440   6
 -17  25  -6 1401.19 458.096   4
  -8 -17  -6 1531.64 519.855   6
 -25  17  -6 1076.71 433.963   6
  -8 -17  -6 1039.34 538.896   5
   8 -25  -6 1784.05 676.515   5
 -17  25  -3 12177.0 803.761   4
 -25  17  -3 10099.7 1695.31   2
  17   8  -3 10584.0 1825.17   1
 -17  25  -3 15430.2 2342.02   2
  -8 -17  -3 11997.8 814.909   6
  25  -8  -3 13036.7 2175.36   1
  -8 -17  -3 10714.2 879.569   5
   8 -25  -3 12832.9 1063.17   5
 -25  17   0 3597.27 690.852   3
 -25  17   0 3399.18 1254.62   2
  -8 -17   0 2336.89 457.076   6
  17   8   0 2128.57 987.470   1
 -17  25   0 2306.68 592.794   3
  -8 -17   0 3648.38 680.896   5
   8 -25   0 2163.54 632.318   5
   8 -25   3 29431.7 1986.58   7
 -17  25   3 28808.2 1509.77   3
 -25  17   3 27775.1 1483.92   3
 -17  25   6 20627.0 1251.23   3
 -25  17   6 22330.7 1328.96   3
 -25  18 -10 6629.67 487.860   6
 -18  25 -10 4799.01 486.298   6
 -18  25  -7 7584.28 653.955   4
  -7 -18  -7 6276.77 662.006   6
 -25  18  -7 6476.61 657.079   6
 -18  25  -7 6855.20 813.740   6
  -7 -18  -7 7056.31 708.640   5
   7 -25  -7 4984.89 691.218   5
 -18  25  -4 980.784 471.213   4
  -7 -18  -4 409.883 454.885   6
  -7 -18  -4 395.493 516.573   5
   7 -25  -4 761.875 660.051   5
 -25  18  -1 2098.36 567.693   3
 -18  25  -1 974.040 941.491   2
 -25  18  -1 1572.40 1168.55   2
  -7 -18  -1 1566.61 425.815   6
  18   7  -1 2139.13 1028.52   1
 -18  25  -1 2759.65 604.453   3
  -7 -18  -1 1228.89 564.871   5
   7 -25  -1 1575.67 577.094   5
   7 -25   2 14822.1 1390.06   7
 -18  25   2 13272.8 1063.58   3
 -25  18   2 13500.0 1022.97   3
  -7 -18   2 13571.0 913.003   5
 -18  25   5 46777.0 1925.47   3
 -25  18   5 47222.1 1999.82   3
 -25  18   8 14724.9 909.715   3
  -6 -19  -8 1158.91 403.123   6
 -19  25  -8 1374.87 401.524   4
 -25  19  -8 1308.20 461.847   6
 -19  25  -8 1418.46 561.296   6
   6 -25  -8 1513.20 434.667   5
 -19  25  -5 57400.5 1837.29   4
  -6 -19  -5 59179.9 1833.91   6
  -6 -19  -5 55087.6 2023.34   5
   6 -25  -5 54313.8 2185.56   5
 -19  25  -2 3493.41 1216.82   2
 -25  19  -2 1916.96 1025.02   2
  19   6  -2 2698.14 1166.39   1
  -6 -19  -2 3385.33 502.478   6
  25  -6  -2 3970.38 1563.58   1
  -6 -19  -2 3968.11 693.754   5
   6 -25  -2 3950.25 788.640   5
 -19  25   1 45405.5 1863.10   3
  -6 -19   1 46915.2 1802.76   5
 -25  19   1 43924.3 1808.31   3
 -25  19   4 861.228 630.749   3
 -19  25   4 195.975 574.449   3
 -19  25   7 9373.21 855.848   3
 -25  19   7 9211.33 868.327   3
 -25  20  -9 8967.41 614.951   6
 -20  25  -9 9948.59 697.133   6
 -20  25  -6 11356.6 759.563   4
 -25  20  -6 9574.71 752.993   6
 -20  25  -6 11315.6 921.997   6
  -5 -20  -6 10490.5 772.842   6
  -5 -20  -6 9655.84 873.264   5
   5 -25  -6 9107.40 912.161   5
 -20  25  -3 2845.03 1310.81   2
 -25  20  -3 4074.37 1339.41   2
  20   5  -3 4580.79 1426.41   1
  -5 -20  -3 3172.04 539.387   6
 -20  25  -3 4695.41 556.211   4
  25  -5  -3 5153.40 1594.44   1
  -5 -20  -3 4194.53 706.339   5
   5 -25  -3 4140.48 763.837   5
 -20  25   0 47442.6 1852.44   3
 -25  20   0 46667.6 1835.61   3
  -5 -20   0 50010.0 1883.00   5
   5 -25   0 47639.2 1901.87   5
   5 -25   3 11691.2 1363.77   7
  -5 -20   3 12363.7 1421.58   7
 -20  25   3 9790.08 973.126   3
 -25  20   3 10575.8 983.776   3
 -20  25   6 769.767 556.313   3
 -25  20   6 1349.30 613.258   3
 -25  21 -10 908.156 291.842   6
 -21  25 -10 496.201 277.112   6
  -4 -21  -7 6936.48 618.449   6
 -25  21  -7 7757.94 691.632   6
 -21  25  -7 7111.26 784.484   6
  -4 -21  -7 6992.14 684.137   5
   4 -25  -7 6976.25 743.489   5
   4 -25  -4 16762.4 903.855   6
 -21  25  -4 17803.1 947.883   4
  -4 -21  -4 16210.8 909.624   6
  -4 -21  -4 16040.6 1095.69   5
   4 -25  -4 16367.9 1228.90   5
  -4 -21  -1 108769. 2664.81   6
 -21  25  -1 96988.6 2854.66   3
 -25  21  -1 100120. 2890.56   3
 -25  21  -1 96661.4 4894.22   2
  21   4  -1 88255.4 4515.61   1
  -4 -21  -1 102976. 2974.44   5
   4 -25  -1 103852. 3026.02   5
 -25  21   2 7084.81 822.170   3
 -21  25   2 7316.33 875.584   3
   4 -25   2 5507.34 1027.66   7
 -21  25   5 189.194 609.542   3
 -25  21   5 141.414 607.596   3
 -21  25   8 990.848 447.949   3
 -25  21   8 265.827 414.020   3
  -3 -22  -8 675.596 340.078   6
 -25  22  -8 1152.85 423.991   6
 -22  25  -8 1886.74 486.445   6
   3 -25  -8 1014.87 384.506   5
   3 -25  -5 2914.55 494.579   6
  -3 -22  -5 3060.74 528.889   6
 -22  25  -5 3943.74 603.742   6
  -3 -22  -5 3161.30 649.517   5
   3 -25  -5 3386.83 718.082   5
  25  -3  -2 8368.99 1799.21   1
 -22  25  -2 6246.44 1519.78   2
 -25  22  -2 9128.45 1694.39   2
  22   3  -2 7472.69 1572.73   1
  -3 -22  -2 6401.85 635.773   6
  -3 -22  -2 7605.54 815.515   5
   3 -25  -2 7013.62 856.825   5
 -22  25   1 45066.4 1896.47   3
 -25  22   1 48853.7 1924.67   3
  -3 -22   1 48759.0 1836.58   5
   3 -25   1 47163.0 1836.51   5
 -22  25   4 7196.50 842.645   3
 -25  22   4 9211.29 948.971   3
 -22  25   7 5254.44 693.279   3
 -25  22   7 5042.73 675.756   3
 -25  23  -9 10242.5 596.622   6
 -23  25  -9 8745.34 591.405   6
   2 -25  -6 4090.22 530.038   6
  -2 -23  -6 4696.10 570.068   6
 -25  23  -6 5885.38 653.455   6
 -23  25  -6 6247.58 705.279   6
  -2 -23  -6 5133.88 723.520   5
   2 -25  -6 5724.43 755.814   5
  -2 -23  -3 39924.0 1460.75   6
  -2 -23  -3 41352.7 1735.97   5
   2 -25  -3 41614.9 1792.59   5
  -2 -23   0 9309.53 882.573   5
   2 -25   0 7931.51 809.477   5
 -23  25   0 8246.17 838.755   3
 -25  23   0 8284.24 846.215   3
 -23  25   3 2506.96 687.262   3
 -25  23   3 3947.07 769.104   3
 -23  25   6 5920.44 758.397   3
 -25  23   6 6867.71 830.550   3
  -1 -24  -7 1064.69 381.003   6
 -25  24  -7 1730.17 470.032   6
 -24  25  -7 1921.60 496.503   6
  -1 -24  -7 1059.57 467.561   5
   1 -25  -7 1360.23 470.095   5
   1 -25  -4 8367.55 683.782   6
  -1 -24  -4 8561.08 674.880   6
  -1 -24  -4 8450.84 900.931   5
   1 -25  -4 7140.69 875.904   5
 -24  25  -1 32725.7 1482.85   3
 -25  24  -1 34420.5 1501.52   3
  -1 -24  -1 37753.7 1646.06   5
   1 -25  -1 34686.7 1580.48   5
 -24  25   2 5506.15 781.091   3
 -25  24   2 5248.46 771.033   3
 -24  25   5-397.475 646.029   3
 -25  24   5 546.418 613.386   3
 -24  25   8 510.885 405.357   3
 -25  24   8 688.250 401.980   3
 -25  25  -8 4947.50 502.493   6
   0 -25  -5 56.8924 403.829   6
   0 -25  -5 83.7196 552.056   5
   0 -25  -2 43448.9 1811.06   5
   0 -25   1-211.374 528.395   5
 -25  25   1-139.990 542.364   3
 -25  25   4 15034.1 1134.75   3
 -25  25   7-515.469 476.252   3
   0  26  -8 773.789 311.766   4
 -26   0  -8 728.704 304.768   6
  26 -26  -8 1292.91 365.630   5
   0  26  -5 25.5367 352.093   4
 -26   0  -5 133.386 365.504   6
   0  26  -2 24936.1 1097.53   4
 -26   0  -2 24691.3 1369.86   3
 -26   0   1 229.815 622.091   3
 -26   0   4 6856.80 910.804   3
 -26   0   7-837.956 438.405   3
   1  25  -9 2342.58 301.863   4
  -1  26  -9 3060.12 330.321   4
 -25  -1  -9 2571.21 336.189   6
 -26   1  -9 2922.69 328.982   6
  25 -26  -6 2241.02 599.888   5
  26 -25  -6 2478.22 593.878   5
   1  25  -6 3179.01 462.084   4
  -1  26  -6 3174.61 464.302   4
 -25  -1  -6 2019.01 449.689   6
 -26   1  -6 3055.83 494.447   6
   1  25  -3 5341.77 552.033   4
  -1  26  -3 5418.78 585.160   4
 -26   1   0 5373.05 823.093   3
 -25  -1   0 6094.63 874.567   3
 -26   1   3 23071.6 1438.86   3
 -25  -1   3 22928.4 1461.00   3
 -26   1   6 11636.5 952.261   3
 -25  -1   6 9478.05 896.963   3
  26 -24  -7 1929.23 513.203   5
   2  24  -7 2002.74 386.238   4
  -2  26  -7 1829.75 425.173   4
 -24  -2  -7 1941.69 460.928   6
 -26   2  -7 1053.28 411.104   6
  24 -26  -7 1794.20 536.575   5
   2  24  -4 1445.25 405.765   4
  -2  26  -4 1281.62 421.670   4
 -24  -2  -4 1788.54 475.377   6
  -2  26  -1 26692.8 1111.47   4
 -26   2  -1 25936.4 1473.87   3
 -24  -2  -1 25650.7 1491.61   3
 -26   2   2 10259.8 1040.66   3
 -24  -2   2 9883.11 1076.05   3
 -26   2   5 4742.57 800.856   3
 -24  -2   5 5613.06 831.665   3
   3  23  -8 811.190 312.275   4
  -3  26  -8 874.930 366.284   4
 -23  -3  -8 1268.77 448.389   6
 -26   3  -8 731.040 363.068   6
  23 -26  -8 1615.59 428.869   5
  23 -26  -5 326.318 599.842   5
   3  23  -5 662.403 372.189   4
 -23  -3  -5 834.602 435.992   6
 -26   3  -5 1425.77 440.229   6
  -3  26  -5 1495.73 450.523   4
 -23  -3  -2 1593.95 604.914   3
  -3  26  -2 1369.76 413.444   4
 -23  -3  -2 982.027 626.586   5
 -26   3   1 28859.0 1553.40   3
 -23  -3   1 27086.5 1547.82   3
 -26   3   4 8632.95 983.298   3
 -23  -3   4 9460.89 1040.79   3
 -26   3   7 2511.57 581.142   3
 -23  -3   7 2698.46 554.873   3
   4  22  -9 2052.22 322.228   4
  -4  26  -9 2889.04 397.878   4
 -22  -4  -9 2669.80 389.958   6
 -26   4  -9 2827.04 386.493   6
  -4  26  -9 2345.93 406.548   6
  22 -26  -6 1745.53 606.255   5
   4  22  -6 2527.58 467.829   4
  -4  26  -6 3208.36 534.308   4
 -22  -4  -6 2875.65 555.008   6
 -26   4  -6 1876.37 473.038   6
 -22  -4  -3 5801.01 628.620   6
  -4  26  -3 4714.52 575.577   4
 -22  -4  -3 4986.65 799.342   5
   4  22   0 9434.75 1577.57   1
 -26   4   0 9642.49 977.869   3
 -22  -4   0 8234.69 948.849   5
 -22  -4   0 9689.01 1053.94   3
 -26   4   3 14134.6 1191.13   3
 -22  -4   3 13926.4 1192.86   3
 -26   4   6 7036.55 843.999   3
 -22  -4   6 7576.17 852.257   3
  -5  26 -10 889.296 244.827   4
 -21  -5 -10 1054.58 238.325   6
   5  21  -7 10560.8 700.495   4
  -5  26  -7 9476.59 764.356   4
 -21  -5  -7 9996.17 787.364   6
 -26   5  -7 10172.9 702.645   6
  21 -26  -7 9690.69 858.946   5
  26 -21  -7 10066.6 802.671   5
 -21  -5  -4 29115.3 1277.13   6
  -5  26  -4 31206.0 1283.38   4
 -21  -5  -4 29787.8 1505.28   5
  21 -26  -4 32346.7 1593.62   5
   5  21  -1 13575.1 1836.40   1
 -21  -5  -1 12798.1 1047.48   5
 -26   5  -1 12193.6 1031.14   3
  -5  26  -1 10680.5 2024.80   2
 -26   5   2 20521.6 1345.38   3
 -21  -5   2 21612.8 1401.27   3
   5  21   2 21941.4 2171.30   1
 -26   5   5 9549.97 988.511   3
 -21  -5   5 9087.54 1014.90   3
   6  20  -8 777.134 340.824   4
  -6  26  -8 444.844 445.508   4
 -20  -6  -8 758.529 459.041   6
 -26   6  -8 920.574 415.673   6
  20 -26  -8 1600.08 490.597   5
  -6  26  -5 62125.9 1972.70   4
 -20  -6  -5 59975.9 1938.14   6
 -26   6  -5 57205.4 1825.93   6
 -20  -6  -5 62456.4 2132.78   5
  20 -26  -5 65580.2 2275.22   5
   6  20  -2 19457.1 2067.01   1
  -6  26  -2 21542.0 1037.95   4
 -20  -6  -2 21462.0 1049.54   6
  -6  26  -2 22000.3 2126.95   1
  -6  26  -2 23736.5 2742.96   2
 -20  -6  -2 21394.3 1280.17   5
  20 -26  -2 17166.1 1238.79   5
   6  20   1 5974.32 1242.31   1
 -26   6   1 5531.77 812.380   3
 -20  -6   1 5180.09 802.657   5
 -26   6   4 1410.37 715.810   3
 -20  -6   4 1683.30 749.355   3
 -26   6   7 8370.05 817.344   3
   7  19  -9 2617.65 375.161   4
  -7  26  -9 2156.52 418.606   4
 -19  -7  -9 2777.21 428.031   6
 -26   7  -9 2619.55 414.455   6
  -7  26  -9 1924.07 468.407   6
  -7  26  -6 1180.85 614.119   4
 -19  -7  -6 683.792 519.529   6
 -26   7  -6 636.560 414.969   6
  19 -26  -6 1107.50 580.836   5
  -7  26  -3 57838.7 1846.59   4
 -19  -7  -3 56174.1 1822.90   6
  -7  26  -3 58864.5 4217.97   2
 -19  -7  -3 59485.7 2165.21   5
  19 -26  -3 54939.7 2198.57   5
   7  19   0 20817.1 2171.36   1
 -19  -7   0 23955.2 1370.68   5
 -26   7   0 24793.9 1397.33   3
  19 -26   0 22736.2 1260.67   5
 -26   7   3 5264.89 819.938   3
 -19  -7   3 5461.17 860.427   3
 -26   7   6 11226.3 1011.20   3
 -19  -7   6 13061.1 1032.16   3
  -8  26 -10 6276.86 444.378   4
 -18  -8 -10 6047.33 405.047   6
 -26   8 -10 5444.44 402.251   6
  -8  26 -10 5956.50 451.966   6
  -8  26  -7 3156.34 577.970   4
 -18  -8  -7 4015.09 637.962   6
 -26   8  -7 3142.41 515.187   6
  18 -26  -7 3853.00 707.589   5
  18 -26  -4 6315.32 890.072   5
 -18  -8  -4 7167.04 728.491   6
  -8  26  -4 6711.66 698.825   4
 -18  -8  -4 5839.48 787.337   5
  18 -26  -1 2135.00 606.358   5
 -26   8  -1 2244.50 630.050   3
 -18  -8  -1 2649.23 513.471   6
   8  18  -1 1825.81 929.542   1
 -18  -8  -1 2405.89 623.180   5
  -8  26  -1 1135.71 1100.70   2
   8  18   2 25741.8 2328.91   1
 -18  -8   2 27414.8 1406.52   5
 -26   8   2 27043.9 1470.70   3
 -26   8   5 10482.3 1009.88   3
 -18  -8   5 9768.19 997.109   3
  -9  26  -8 2262.91 509.739   4
 -17  -9  -8 2998.28 545.420   6
 -26   9  -8 2472.71 475.114   6
  17 -26  -8 2182.20 544.302   5
  -9  26  -5 41063.4 1596.94   4
 -17  -9  -5 43622.6 1620.09   6
 -26   9  -5 36838.3 1387.08   6
 -17  -9  -5 41302.2 1722.51   5
  17 -26  -5 43155.0 1836.16   5
 -17  -9  -2 54534.5 1748.23   6
  -9  26  -2 55963.3 3920.75   2
 -17  -9  -2 47778.2 1929.81   5
  17 -26  -2 50672.8 2005.25   5
   9  17  -2 48873.5 3234.47   1
   9  17   1 12398.0 1680.95   1
 -17  -9   1 10893.6 920.786   5
 -26   9   1 10197.6 980.592   3
 -26   9   4 11349.3 1043.65   3
 -17  -9   4 11128.2 1037.12   3
 -26   9   7 7631.16 815.317   3
 -16 -10  -9 2446.56 437.511   6
 -10  26  -9 1014.53 380.593   4
 -26  10  -9 1841.15 403.763   6
 -10  26  -9 1498.40 474.405   6
 -10  26  -6 22423.9 1139.23   4
 -16 -10  -6 24744.9 1221.46   6
 -26  10  -6 22853.0 1074.87   6
 -16 -10  -6 22486.3 1180.40   5
  16 -26  -6 24340.6 1362.81   5
  16 -26  -3 2812.91 734.024   5
  10  16  -3 1884.74 1031.50   1
 -26  10  -3 3240.41 1413.86   2
 -16 -10  -3 3040.74 554.234   6
 -10  26  -3 2654.41 528.571   4
 -16 -10  -3 2363.86 649.322   5
 -10  26  -3 4352.50 1505.85   2
  16 -26   0 1294.95 524.585   5
 -26  10   0 2354.10 652.499   3
 -16 -10   0 2380.17 478.684   6
  10  16   0 2070.22 928.444   1
 -16 -10   0 3116.88 657.301   5
 -26  10   3 5717.49 839.901   3
 -16 -10   3 5040.36 707.975   5
 -16 -10   6 16754.6 1143.12   3
 -26  10   6 15574.4 1167.99   3
 -11  26 -10 3211.28 378.502   4
 -15 -11 -10 3755.58 370.252   6
 -26  11 -10 4135.54 385.115   6
 -11  26 -10 3688.67 427.283   6
 -11  26  -7 4151.66 621.484   4
 -15 -11  -7 4781.59 691.969   6
 -26  11  -7 3746.66 579.192   6
  15 -26  -7 4767.87 755.960   5
 -15 -11  -4 1926.64 545.990   6
 -11  26  -4 1595.78 508.807   4
 -15 -11  -4 849.899 575.927   5
  15 -26  -4 1158.43 663.695   5
  11  15  -1 13017.6 1735.93   1
 -15 -11  -1 15323.0 906.169   6
 -15 -11  -1 12780.1 970.453   5
 -26  11  -1 14731.6 1061.01   3
  15 -26  -1 12076.1 1017.84   5
 -11  26  -1 13098.7 1806.87   2
 -26  11   2 7314.48 834.806   3
  11  15   2 5106.67 1287.49   1
 -15 -11   2 7769.32 801.595   5
 -26  11   5 13497.7 1098.47   3
 -15 -11   5 13941.7 1116.73   3
 -26  11   8 18598.0 999.858   3
 -12  26  -8 7823.41 684.815   4
 -14 -12  -8 8865.87 729.336   6
 -26  12  -8 8593.48 682.453   6
 -12  26  -8 6752.64 793.387   6
  14 -26  -8 7456.36 716.752   5
 -14 -12  -5 6482.00 750.925   6
 -12  26  -5 6994.87 712.495   4
 -14 -12  -5 6698.24 815.533   5
  14 -26  -5 6244.21 920.847   5
  12  14  -2 1028.59 994.395   1
 -26  12  -2 1488.12 1208.22   2
  26 -14  -2 2590.45 1365.71   1
 -14 -12  -2 1437.36 490.493   6
 -14 -12  -2 868.562 538.649   5
 -12  26  -2 2857.81 1211.18   2
  14 -26  -2 1612.83 695.168   5
  12  14   1 21005.0 2042.67   1
 -12  26   1 25468.4 1373.57   3
 -14 -12   1 23115.4 1284.46   5
 -26  12   1 21513.9 1295.73   3
 -26  12   4 10087.6 990.372   3
 -12  26   4 10863.3 1063.93   3
 -26  12   7 5113.85 710.646   3
 -13  26  -9 4789.71 506.721   4
 -26  13  -9 4976.55 508.794   6
 -13  26  -9 5219.17 633.938   6
 -13 -13  -9 6002.46 522.790   6
 -13  26  -6 8166.11 742.402   4
 -13 -13  -6 9028.02 829.279   6
 -26  13  -6 7773.07 689.859   6
 -13 -13  -6 9425.99 841.688   5
  13 -26  -6 9327.52 956.157   5
 -26  13  -3 3715.85 1372.99   2
  26 -13  -3 3491.63 1591.07   1
 -13 -13  -3 4884.63 631.500   6
 -13  26  -3 4958.20 602.819   4
  13  13  -3 3506.20 1191.66   1
 -13 -13  -3 4110.38 727.300   5
 -13  26  -3 2418.20 1178.21   2
  13 -26  -3 3565.93 781.408   5
 -26  13   0-3.51318 508.856   3
  13  13   0 342.359 858.833   1
 -13 -13   0 162.801 389.556   6
 -13 -13   0 157.876 551.301   5
  13 -26   0-80.9987 498.709   5
 -26  13   3 3937.39 723.166   3
 -13  26   3 5130.42 829.595   3
 -26  13   6 8803.03 934.498   3
 -14  26 -10 129.706 254.474   4
 -12 -14 -10-77.5468 230.751   6
 -26  14 -10 146.141 275.384   6
 -14  26 -10 752.220 353.055   6
 -14  26  -7 3963.33 587.681   4
 -12 -14  -7 5918.27 679.118   6
 -26  14  -7 3666.23 561.445   6
  12 -26  -7 5426.35 782.765   5
 -14  26  -4 10968.3 803.131   4
 -12 -14  -4 10872.8 821.788   6
 -12 -14  -4 9137.15 863.026   5
  12 -26  -4 10439.2 1052.15   5
 -12 -14  -1 23664.5 1135.11   6
 -14  26  -1 20445.3 2212.46   2
 -12 -14  -1 22282.7 1229.21   5
 -26  14  -1 22830.3 1262.10   3
 -26  14  -1 22384.3 2470.49   2
  12 -26  -1 22562.8 1274.07   5
  14  12  -1 23529.1 2241.97   1
 -26  14   2 953.381 577.054   3
 -12 -14   2 1495.65 573.140   5
 -14  26   2 913.591 593.245   3
 -26  14   5 6894.69 896.492   3
 -14  26   5 7818.96 875.713   3
 -26  14   8 8533.91 721.865   3
 -15  26  -8 16389.2 880.898   4
 -11 -15  -8 17519.9 910.624   6
 -26  15  -8 17415.2 901.941   6
 -15  26  -8 16812.2 1055.12   6
  11 -26  -8 15584.8 947.900   5
 -15  26  -5 12643.0 878.054   4
 -11 -15  -5 13477.8 935.380   6
 -11 -15  -5 12055.7 947.019   5
  11 -26  -5 14175.5 1179.01   5
 -26  15  -2 5090.32 1379.41   2
 -11 -15  -2 8095.96 687.724   6
  26 -11  -2 9109.48 1887.77   1
  15  11  -2 7985.18 1468.23   1
 -11 -15  -2 6972.71 769.489   5
  11 -26  -2 7526.19 893.591   5
 -15  26  -2 6663.35 1501.54   2
  15  11   1 13290.0 1680.20   1
 -15  26   1 14503.4 1071.50   3
 -11 -15   1 14063.8 979.885   5
 -26  15   1 13321.1 1015.71   3
 -26  15   4 1662.73 690.210   3
 -15  26   4 1131.68 643.842   3
 -26  15   7 3297.73 640.781   3
 -16  26  -9 8155.94 575.118   4
 -10 -16  -9 7048.89 539.151   6
 -26  16  -9 8925.87 629.963   6
 -16  26  -9 8462.23 711.371   6
 -16  26  -6 15266.3 919.805   4
 -10 -16  -6 15776.3 952.133   6
 -26  16  -6 14708.8 877.701   6
 -10 -16  -6 14499.6 999.916   5
  10 -26  -6 14556.6 1149.85   5
 -16  26  -3 6373.15 1627.81   2
 -26  16  -3 4375.39 1448.19   2
 -10 -16  -3 5473.31 653.287   6
 -16  26  -3 5378.98 604.127   4
  26 -10  -3 5659.63 1734.62   1
  16  10  -3 6038.28 1468.33   1
 -10 -16  -3 4770.54 693.627   5
  10 -26  -3 6246.52 911.697   5
  16  10   0 3316.48 1207.17   1
 -26  16   0 3704.43 657.180   3
 -26  16   0 5767.41 1521.00   2
 -10 -16   0 2741.12 501.840   6
 -16  26   0 2445.80 630.312   3
 -10 -16   0 3522.04 658.092   5
  10 -26   0 4163.33 779.886   5
 -26  16   3 2547.46 689.016   3
  10 -26   3 2983.60 791.300   7
 -16  26   3 2429.66 710.451   3
 -16  26   6 22407.6 1293.56   3
 -26  16   6 25164.0 1383.23   3
 -26  17 -10 1135.96 297.390   6
 -17  26 -10-1034.26 368.723   6
 -17  26  -7 6834.91 630.404   4
  -9 -17  -7 5903.11 655.404   6
 -26  17  -7 6738.90 634.243   6
 -17  26  -7 6001.48 787.067   6
  -9 -17  -7 7490.30 696.959   5
   9 -26  -7 6490.30 783.543   5
 -17  26  -4 11114.4 789.093   4
   9 -26  -4 11224.0 1122.54   5
  -9 -17  -4 9728.10 789.992   6
  -9 -17  -4 8538.61 859.685   5
 -26  17  -1 11822.5 1908.52   2
 -17  26  -1 12808.8 944.419   3
 -26  17  -1 13102.9 977.821   3
  -9 -17  -1 10804.2 933.654   5
  -9 -17  -1 12828.1 812.427   6
  17   9  -1 11485.1 1657.91   1
   9 -26  -1 12804.5 1038.16   5
   9 -26   2 48850.0 2539.20   7
 -17  26   2 52152.5 2039.53   3
  -9 -17   2 51000.4 1850.54   5
 -26  17   2 47972.6 1949.84   3
 -17  26   5 40709.4 1768.20   3
 -26  17   5 40515.6 1833.53   3
 -26  17   8 2329.27 493.164   3
 -18  26  -8 5675.65 560.530   4
  -8 -18  -8 5797.78 567.544   6
 -26  18  -8 6486.85 639.322   6
 -18  26  -8 5310.80 686.794   6
   8 -26  -8 5367.95 598.763   5
 -18  26  -5 9828.32 752.464   4
  -8 -18  -5 10117.0 774.001   6
  -8 -18  -5 10980.3 917.343   5
   8 -26  -5 9831.40 1043.58   5
  -8 -18  -2 28737.4 1215.97   6
 -18  26  -2 25194.5 2449.19   2
 -26  18  -2 26428.1 2635.14   2
  -8 -18  -2 26367.8 1332.56   5
  26  -8  -2 25370.1 2708.43   1
   8 -26  -2 28635.0 1521.16   5
  18   8  -2 29197.2 2564.20   1
 -26  18   1 2255.20 650.399   3
  -8 -18   1 2911.22 620.031   5
 -18  26   1 1332.43 595.178   3
 -26  18   4 7181.36 889.538   3
 -18  26   4 6398.88 861.092   3
 -18  26   7 4167.74 641.970   3
 -26  18   7 4269.22 721.239   3
 -26  19  -9 18091.7 795.980   6
 -19  26  -9 18646.0 878.105   6
 -19  26  -6 11264.7 762.492   4
  -7 -19  -6 10558.8 811.366   6
 -26  19  -6 9932.03 753.477   6
 -19  26  -6 11024.4 922.904   6
  -7 -19  -6 11504.7 877.747   5
   7 -26  -6 10887.7 952.862   5
 -19  26  -3 2737.68 1354.03   2
  -7 -19  -3 4901.97 608.490   6
 -19  26  -3 6540.81 628.218   4
  26  -7  -3 2556.84 1317.27   1
  -7 -19  -3 5243.85 731.612   5
   7 -26  -3 6642.51 904.191   5
 -19  26   0 25556.1 1334.40   3
 -26  19   0 24638.6 1329.72   3
  -7 -19   0 27013.4 1388.59   5
 -26  19   0 24543.4 2453.47   2
   7 -26   0 26362.5 1383.19   5
  19   7   0 25603.4 2336.43   1
   7 -26   3 60410.7 2976.74   7
 -19  26   3 56488.7 2165.82   3
 -26  19   3 56627.7 2188.13   3
 -19  26   6 1365.68 570.864   3
 -26  19   6 1580.65 624.656   3
 -20  26 -10 8535.91 492.058   6
 -20  26  -7 7752.95 611.538   4
  -6 -20  -7 6755.66 640.068   6
 -26  20  -7 6759.11 638.956   6
 -20  26  -7 6581.59 753.057   6
  -6 -20  -7 7181.82 690.982   5
   6 -26  -7 6431.46 733.925   5
  -6 -20  -4 972.392 446.200   6
 -20  26  -4 1043.28 451.800   4
  -6 -20  -4 492.394 556.271   5
   6 -26  -4 1577.09 753.751   5
 -26  20  -1 6427.69 1393.59   2
  -6 -20  -1 6163.74 600.336   6
  20   6  -1 3985.53 1197.93   1
 -20  26  -1 5535.00 684.316   3
  -6 -20  -1 5326.31 756.749   5
   6 -26  -1 5449.75 795.531   5
 -26  20  -1 5073.57 716.223   3
 -20  26   2 19990.7 1277.81   3
 -26  20   2 19428.6 1220.86   3
 -20  26   5 62909.5 2266.07   3
 -26  20   5 64108.2 2336.83   3
 -26  20   8 1075.68 431.676   3
 -26  21  -8 7945.97 619.363   6
 -21  26  -8 8912.11 700.301   6
   5 -26  -8 7099.77 598.040   5
 -21  26  -5 9163.70 693.460   4
  -5 -21  -5 9031.73 729.404   6
 -21  26  -5 8632.92 818.111   6
  -5 -21  -5 8834.66 883.575   5
   5 -26  -5 7815.61 931.562   5
 -26  21  -2 17936.4 2265.50   2
 -21  26  -2 20996.5 2310.29   2
  21   5  -2 21327.1 2348.71   1
  -5 -21  -2 20103.7 1197.70   5
   5 -26  -2 21153.4 1310.19   5
  -5 -21  -2 20167.2 1036.67   6
  26  -5  -2 19324.2 2501.16   1
 -21  26   1 11766.7 1003.52   3
 -26  21   1 11760.5 990.481   3
  -5 -21   1 13913.9 1018.16   5
   5 -26   1 12257.6 964.839   5
 -21  26   4 29609.6 1528.40   3
 -26  21   4 30438.5 1566.52   3
 -26  21   7 10671.7 871.815   3
 -21  26   7 10084.1 1049.41   3
 -26  22  -9 3829.59 423.351   6
 -22  26  -9 2810.60 397.673   6
  -4 -22  -6 6001.22 614.425   6
 -26  22  -6 6565.59 613.532   6
 -22  26  -6 7597.85 743.743   6
  -4 -22  -6 5706.03 751.020   5
   4 -26  -6 5664.57 755.939   5
 -22  26  -3 15990.3 878.639   4
  -4 -22  -3 14028.6 872.320   6
  -4 -22  -3 14714.5 1030.02   5
   4 -26  -3 15760.9 1173.68   5
 -26  22   0 9184.60 853.203   3
  -4 -22   0 10005.8 906.457   5
 -22  26   0 7918.30 813.300   3
   4 -26   0 9590.73 901.906   5
 -22  26   3 4625.91 752.438   3
 -26  22   3 4175.76 747.184   3
 -22  26   6 2450.08 623.988   3
 -26  22   6 2334.47 664.631   3
  -3 -23  -7 2326.08 421.150   6
 -26  23  -7 2778.97 472.028   6
 -23  26  -7 3363.91 568.699   6
  -3 -23  -7 2046.62 494.384   5
   3 -26  -7 3292.49 570.521   5
  -3 -23  -4 7804.06 680.405   6
  -3 -23  -4 9897.54 917.051   5
   3 -26  -4 9404.49 968.410   5
 -23  26  -1 26226.0 1294.11   3
 -26  23  -1 27127.4 1335.08   3
  -3 -23  -1 26871.0 1401.33   5
   3 -26  -1 26441.2 1413.48   5
 -23  26   2 1149.66 597.620   3
 -26  23   2 701.284 602.931   3
 -23  26   5 1056.67 579.882   3
 -26  23   5 1937.95 693.483   3
 -23  26   8 1202.89 412.156   3
 -26  23   8 700.424 397.779   3
 -26  24  -8 2585.32 418.373   6
   2 -26  -8 2362.25 404.601   5
  -2 -24  -5 4220.79 538.553   6
 -24  26  -5 5550.31 652.411   6
  -2 -24  -5 6108.00 775.762   5
   2 -26  -5 5533.37 808.548   5
  -2 -24  -2 11553.4 977.185   5
   2 -26  -2 11161.8 1015.51   5
 -24  26   1 25876.6 1400.05   3
 -26  24   1 25745.6 1410.35   3
  -2 -24   1 30512.3 1405.71   5
   2 -26   1 28756.9 1391.29   5
 -24  26   4 898.566 592.910   3
 -26  24   4 197.671 607.456   3
 -24  26   7 2172.09 531.698   3
 -26  24   7 2020.10 547.108   3
 -26  25  -9 138.105 249.676   6
 -25  26  -9-288.790 269.008   6
 -26  25  -6 10865.6 747.615   6
 -25  26  -6 11466.7 774.331   6
  -1 -25  -6 9764.80 843.744   5
   1 -26  -6 9756.56 855.264   5
  -1 -25  -3 24760.4 1330.65   5
   1 -26  -3 21067.3 1308.95   5
  -1 -25   0 5552.52 745.428   5
   1 -26   0 5887.92 781.021   5
 -25  26   0 5679.15 748.059   3
 -26  25   0 5807.23 747.692   3
 -25  26   3 4695.62 749.482   3
 -26  25   3 4765.63 800.163   3
 -25  26   6 2464.21 593.634   3
 -26  25   6 3160.97 647.379   3
 -26  26  -7-506.721 411.141   6
   0 -26  -7-456.243 411.939   5
   0 -26  -4 5703.91 807.987   5
 -26  26  -1-47.3453 451.613   3
   0 -26  -1 771.876 608.709   5
 -26  26   2 23094.7 1340.04   3
 -26  26   5-847.848 650.788   3
 -26  26   8 1236.72 371.025   3
  27 -27  -6 2087.05 566.723   5
   0  27  -6 3073.98 424.337   4
 -27   0  -6 2680.18 433.642   6
   0  27  -3-209.229 360.610   4
 -27   0   0 22221.5 1414.96   3
 -27   0   3 166.615 664.235   3
 -27   0   6 959.620 534.049   3
   1  26  -7 1704.77 357.370   4
  -1  27  -7 1755.80 379.896   4
 -26  -1  -7 1958.24 390.066   6
 -27   1  -7 2524.04 395.783   6
  26 -27  -7 1756.05 458.296   5
  27 -26  -7 2063.91 443.561   5
   1  26  -4 12675.9 740.312   4
  -1  27  -4 12731.7 751.439   4
  26 -27  -4 12164.9 1020.77   5
  -1  27  -1 23272.4 1024.69   4
 -27   1  -1 21807.6 1356.97   3
 -26  -1  -1 21086.1 1365.76   3
 -27   1   2 3314.25 777.174   3
 -26  -1   2 3147.56 752.000   3
 -27   1   5 3650.24 712.354   3
 -26  -1   5 3662.18 740.047   3
   2  25  -8 3032.38 356.414   4
  -2  27  -8 2552.70 370.357   4
 -25  -2  -8 2367.11 381.143   6
 -27   2  -8 3054.71 372.089   6
  25 -27  -8 3147.80 427.896   5
  25 -27  -5 2784.22 691.799   5
   2  25  -5 3887.78 498.138   4
  -2  27  -5 3611.98 518.844   4
 -25  -2  -5 3028.59 509.104   6
 -27   2  -5 2806.74 462.215   6
 -27   2  -2 1214.29 572.293   3
 -25  -2  -2 1540.09 613.469   3
  -2  27  -2 1827.25 483.263   4
 -27   2   1 50479.5 2121.46   3
 -25  -2   1 50201.4 2141.72   3
 -27   2   4 1651.83 691.445   3
 -25  -2   4 1502.08 713.358   3
 -27   2   7 4792.48 596.840   3
 -25  -2   7 5924.49 611.039   3
  -3  27  -9 424.953 241.406   4
 -24  -3  -9 997.660 263.278   6
 -27   3  -9 1037.51 253.895   6
  24 -27  -6 338.437 554.230   5
   3  24  -6 736.235 391.560   4
  -3  27  -6 519.537 375.599   4
 -24  -3  -6 946.691 426.797   6
 -27   3  -6 228.210 336.934   6
  -3  27  -3 2060.85 459.208   4
 -24  -3  -3 1688.91 695.193   5
 -27   3   0 23311.9 1445.54   3
 -24  -3   0 24557.2 1480.63   3
 -27   3   3 9279.83 1014.23   3
 -24  -3   3 9457.18 1051.19   3
 -27   3   6 3311.62 683.742   3
 -24  -3   6 2510.41 629.862   3
  27 -23  -7 1387.45 456.601   5
   4  23  -7 1422.62 359.577   4
  -4  27  -7 1636.07 416.036   4
 -23  -4  -7 2025.75 479.200   6
 -27   4  -7 1191.60 356.547   6
  23 -27  -7 1726.93 525.622   5
  23 -27  -4 1934.67 647.795   5
 -23  -4  -4 2340.01 513.599   6
  -4  27  -4 2729.40 504.067   4
 -23  -4  -4 2358.81 674.776   5
 -27   4  -1-67.1217 550.939   3
 -23  -4  -1 58.0558 590.166   3
 -23  -4  -1 56.1309 581.716   5
 -27   4   2 4876.66 837.522   3
 -23  -4   2 6052.59 937.160   3
 -27   4   5 29043.1 1543.54   3
 -23  -4   5 28042.0 1529.72   3
   5  22  -8 11853.1 630.717   4
  -5  27  -8 13269.3 730.444   4
 -22  -5  -8 10827.7 722.872   6
 -27   5  -8 11225.7 657.411   6
  22 -27  -8 13118.7 776.100   5
  22 -27  -5 3216.03 743.570   5
   5  22  -5 3410.92 476.594   4
  -5  27  -5 3833.25 564.846   4
 -22  -5  -5 3431.35 591.100   6
 -22  -5  -5 2948.41 601.543   5
  -5  27  -2 8280.88 674.464   4
 -22  -5  -2 7806.98 886.305   3
 -22  -5  -2 7581.34 894.622   5
 -22  -5   1 13507.3 1135.13   5
 -27   5   1 13334.6 1145.51   3
 -22  -5   1 11812.8 1123.38   3
 -27   5   4 50818.8 2123.99   3
 -22  -5   4 55026.9 2226.41   3
 -27   5   7 3131.44 597.901   3
  -6  27  -9 5963.54 475.474   4
 -21  -6  -9 5817.55 480.906   6
 -27   6  -9 5396.02 427.252   6
  -6  27  -9 5315.35 511.087   6
   6  21  -6 5369.15 559.378   4
  -6  27  -6 5262.56 637.055   4
 -21  -6  -6 6327.82 667.680   6
 -27   6  -6 3765.99 508.871   6
  21 -27  -6 4688.48 760.260   5
  -6  27  -3 14820.3 872.800   4
 -21  -6  -3 13678.5 865.683   6
 -21  -6  -3 14145.7 1133.43   5
  21 -27  -3 13663.7 1097.97   5
  21 -27   0 1477.98 537.646   5
 -27   6   0 1885.65 635.181   3
   6  21   0 2159.41 1112.84   1
 -21  -6   0 1800.76 651.531   5
 -27   6   3 4275.16 800.921   3
 -21  -6   3 6169.94 906.477   3
 -27   6   6 6945.55 864.885   3
 -21  -6   6 7156.37 810.880   3
  -7  27  -7 717.452 482.440   4
 -20  -7  -7 1338.03 502.235   6
 -27   7  -7 502.695 369.106   6
  20 -27  -7 1388.00 560.218   5
  -7  27  -4 25748.3 1190.09   4
 -20  -7  -4 22316.5 1123.06   6
 -20  -7  -4 25015.7 1397.61   5
  20 -27  -4 24921.2 1424.16   5
   7  20  -1 17302.1 1940.22   1
 -20  -7  -1 16278.7 1154.29   5
 -27   7  -1 17708.5 1169.50   3
  20 -27  -1 15999.7 1106.64   5
 -27   7   2 1699.73 650.019   3
 -20  -7   2 2220.42 672.711   5
 -27   7   5 2947.49 737.531   3
 -20  -7   5 2371.92 671.405   3
  -8  27  -8 597.312 428.041   4
 -19  -8  -8 1056.18 440.694   6
 -27   8  -8 619.530 365.526   6
  19 -27  -8 1141.62 489.294   5
  19 -27  -5 6322.88 849.156   5
  -8  27  -5 8189.85 739.262   4
 -19  -8  -5 7433.87 731.066   6
 -19  -8  -5 6818.54 806.067   5
  19 -27  -2 6007.96 817.083   5
 -19  -8  -2 6034.16 655.490   6
 -19  -8  -2 6719.99 831.406   5
  -8  27  -2 8564.19 1883.19   2
 -27   8   1 723.520 589.865   3
 -19  -8   1 1298.17 633.357   5
   8  19   1 34.2065 825.122   1
 -27   8   4 9257.38 1006.61   3
 -19  -8   4 10693.4 1046.99   3
 -27   8   7 5750.85 718.122   3
  -9  27  -9 6328.58 532.639   4
 -18  -9  -9 6570.37 520.714   6
 -27   9  -9 6929.90 506.305   6
  -9  27  -9 5521.37 585.057   6
  -9  27  -6 447.404 455.929   4
 -18  -9  -6 871.930 515.031   6
 -27   9  -6 433.639 404.384   6
 -18  -9  -6 917.681 485.939   5
  18 -27  -6 1062.02 635.395   5
  -9  27  -3 53149.9 1801.46   4
 -18  -9  -3 52862.8 1781.95   6
 -18  -9  -3 50553.9 2051.10   5
   9  18   0 16225.4 1935.16   1
 -18  -9   0 15961.4 1117.69   5
 -27   9   0 16246.8 1142.47   3
  18 -27   0 13863.2 1029.06   5
 -27   9   3 8747.51 945.107   3
 -27   9   6 3261.01 735.760   3
 -18  -9   6 4133.38 685.637   3
 -17 -10 -10 835.344 240.095   6
 -10  27 -10 1293.26 279.009   4
 -10  27  -7 960.933 483.163   4
 -17 -10  -7 2186.25 582.030   6
 -27  10  -7 1251.24 420.024   6
  17 -27  -7 2472.81 666.509   5
  17 -27  -4 2497.87 745.812   5
 -17 -10  -4 2165.77 569.091   6
 -10  27  -4 2140.53 533.077   4
 -17 -10  -4 1935.06 632.000   5
 -17 -10  -1 31370.5 1323.08   6
 -17 -10  -1 31733.6 1517.90   5
 -27  10  -1 31617.7 1549.57   3
  17 -27  -1 30332.7 1503.48   5
  10  17  -1 27741.0 2471.61   1
 -27  10   2 3091.30 705.038   3
  10  17   2 2507.02 1145.33   1
 -17 -10   2 4143.52 699.001   5
 -27  10   5 13505.9 1118.08   3
 -17 -10   5 14696.3 1147.71   3
 -27  10   8 304.119 381.759   3
 -11  27  -8 598.741 414.121   4
 -16 -11  -8 199.725 428.892   6
 -27  11  -8-199.391 375.260   6
 -11  27  -8-293.795 542.962   6
  16 -27  -8-55.1502 426.307   5
 -16 -11  -5 5882.27 727.354   6
 -11  27  -5 5533.64 666.404   4
 -16 -11  -5 5555.47 755.798   5
  16 -27  -5 6073.89 886.896   5
 -16 -11  -2 27243.1 1206.73   6
 -11  27  -2 23112.1 2537.38   2
 -16 -11  -2 23270.5 1350.56   5
  16 -27  -2 23541.1 1399.63   5
  11  16  -2 23727.8 2306.98   1
  11  16   1 117299. 4973.39   1
 -16 -11   1 114663. 3240.33   5
 -27  11   1 109333. 3281.98   3
 -27  11   4 9077.84 977.294   3
 -27  11   7 13017.2 980.590   3
 -12  27  -9 10435.9 642.204   4
 -15 -12  -9 11622.0 645.041   6
 -27  12  -9 10514.8 623.830   6
 -12  27  -9 10368.9 752.351   6
 -15 -12  -6 8647.70 786.956   6
 -27  12  -6 6668.25 625.496   6
 -12  27  -6 7587.15 721.301   4
 -15 -12  -6 8031.79 792.069   5
  15 -27  -6 7933.77 927.906   5
 -12  27  -3 30059.1 1296.07   4
 -15 -12  -3 29870.7 1306.41   6
  27 -15  -3 28221.2 3131.23   1
 -15 -12  -3 28060.2 1451.03   5
  15 -27  -3 31073.2 1594.55   5
 -27  12   0 6347.49 789.246   3
 -15 -12   0 5346.10 599.990   6
  12  15   0 4092.55 1177.62   1
 -15 -12   0 4926.95 750.499   5
  15 -27   0 4987.61 726.310   5
 -15 -12   3 17247.4 1088.01   5
 -27  12   3 16540.9 1197.28   3
 -27  12   6 10499.0 964.280   3
 -14 -13 -10 1561.04 261.447   6
 -13  27 -10 3186.53 381.628   6
 -13  27  -7 3868.19 571.823   4
 -14 -13  -7 5014.74 664.699   6
 -27  13  -7 4396.45 537.163   6
  14 -27  -7 3497.33 678.963   5
 -13  27  -4 12628.6 868.047   4
 -14 -13  -4 11261.9 860.970   6
 -14 -13  -4 12832.0 1043.51   5
  14 -27  -4 12043.2 1146.30   5
  13  14  -1 15253.9 1844.35   1
 -14 -13  -1 16284.4 937.553   6
 -14 -13  -1 15668.0 1097.61   5
 -27  13  -1 15949.1 1076.25   3
  14 -27  -1 17298.5 1158.42   5
 -27  13   2 4179.60 737.023   3
 -14 -13   2 4635.34 706.816   5
 -13  27   2 5368.31 834.588   3
 -27  13   5 15434.1 1159.24   3
 -14 -13   5 17276.9 1197.94   3
 -27  13   8 4753.33 575.286   3
 -14  27  -8 4093.08 512.879   4
 -13 -14  -8 5279.46 568.951   6
 -27  14  -8 5497.59 564.600   6
 -14  27  -8 3363.45 637.078   6
  13 -27  -8 3462.53 559.256   5
 -14  27  -5 15569.7 957.453   4
 -13 -14  -5 15734.2 995.291   6
 -13 -14  -5 15122.6 1086.79   5
  13 -27  -5 14648.9 1193.70   5
 -27  14  -2 7075.04 1765.93   2
 -13 -14  -2 4853.33 609.320   6
  27 -13  -2 4093.59 1633.65   1
 -13 -14  -2 5022.34 753.727   5
  14  13  -2 4036.46 1293.23   1
 -14  27  -2 5443.02 1486.60   2
  13 -27  -2 5193.77 813.228   5
  14  13   1 15753.9 1846.55   1
 -14  27   1 15604.7 1153.93   3
 -13 -14   1 15844.8 1057.27   5
 -27  14   1 14834.2 1118.15   3
 -27  14   4 10737.7 1027.00   3
 -14  27   4 11827.9 1062.01   3
 -27  14   7 3447.48 639.985   3
 -15  27  -9 9788.71 624.525   4
 -12 -15  -9 9932.19 589.041   6
 -27  15  -9 10573.5 618.021   6
 -15  27  -9 10554.6 750.263   6
 -15  27  -6 11032.7 803.089   4
 -12 -15  -6 10522.7 841.525   6
 -27  15  -6 10267.7 727.032   6
 -12 -15  -6 10869.5 861.945   5
  12 -27  -6 9795.53 989.384   5
 -15  27  -3 19072.8 1006.58   4
 -12 -15  -3 17455.5 1028.50   6
 -12 -15  -3 16850.1 1110.74   5
  12 -27  -3 17995.5 1262.49   5
 -27  15   0 5922.48 776.746   3
  15  12   0 4417.35 1104.61   1
 -12 -15   0 5147.46 593.219   6
 -15  27   0 5749.04 777.444   3
 -12 -15   0 5415.02 734.822   5
  12 -27   0 5449.81 759.017   5
 -15  27   3 29001.6 1559.88   3
 -27  15   3 28626.5 1537.94   3
 -27  15   6 7932.63 882.430   3
 -16  27 -10 3525.42 396.782   6
 -16  27  -7 12972.3 818.725   4
 -11 -16  -7 12678.8 853.158   6
 -27  16  -7 12226.9 783.005   6
 -16  27  -7 12238.8 962.951   6
 -11 -16  -7 12711.8 839.506   5
  11 -27  -7 11985.4 932.522   5
 -16  27  -4 8937.23 740.950   4
 -11 -16  -4 8052.15 763.434   6
 -11 -16  -4 9526.61 901.581   5
  11 -27  -4 9189.83 1006.21   5
 -11 -16  -1 123866. 3024.80   6
 -27  16  -1 115162. 3252.85   3
 -11 -16  -1 110972. 3209.87   5
 -27  16  -1 116213. 5626.43   2
  11 -27  -1 116921. 3291.21   5
  16  11  -1 110300. 5091.60   1
  11 -27   2 23802.5 1774.19   7
 -16  27   2 27235.7 1513.13   3
 -11 -16   2 25091.7 1288.94   5
 -27  16   2 24190.1 1380.49   3
 -27  16   5 6104.70 855.264   3
 -16  27   5 6152.06 818.736   3
 -27  16   8-49.4739 403.901   3
 -17  27  -8 143.541 354.540   4
 -27  17  -8 606.751 419.866   6
 -17  27  -8-498.944 535.273   6
  10 -27  -8-394.767 426.340   5
 -10 -17  -8 260.102 377.289   6
 -17  27  -5 15403.7 926.627   4
 -10 -17  -5 14261.4 926.680   6
 -10 -17  -5 13760.2 1004.90   5
  10 -27  -5 14943.2 1201.76   5
 -17  27  -2 1911.67 1256.30   2
 -27  17  -2 5150.40 1517.59   2
 -10 -17  -2 1453.73 489.013   6
  27 -10  -2 1617.42 1349.16   1
  17  10  -2 4153.33 1267.29   1
 -10 -17  -2 2616.46 604.236   5
  10 -27  -2 3979.22 795.012   5
 -17  27   1 33252.8 1608.41   3
 -10 -17   1 33929.3 1520.51   5
 -27  17   1 31778.8 1567.66   3
 -27  17   4 2307.24 699.047   3
 -17  27   4 3142.20 791.521   3
 -27  17   7 1245.83 536.272   3
 -27  18  -9 12325.9 640.026   6
 -18  27  -9 13278.2 746.458   6
 -18  27  -6 4278.57 562.027   4
  -9 -18  -6 3996.45 616.174   6
 -27  18  -6 3223.40 495.103   6
  -9 -18  -6 3815.42 653.551   5
   9 -27  -6 4603.67 803.766   5
 -18  27  -3 9703.20 738.458   4
  -9 -18  -3 8245.08 741.058   6
   9 -27  -3 9860.39 1061.24   5
  -9 -18  -3 8270.94 811.901   5
  18   9   0 12876.6 1831.26   1
 -27  18   0 17069.4 2166.36   2
  -9 -18   0 17403.7 947.758   6
 -18  27   0 15381.5 1098.74   3
 -27  18   0 17822.6 1133.02   3
  -9 -18   0 15930.9 1100.26   5
   9 -27   0 17079.2 1139.98   5
 -18  27   3 53003.5 2118.10   3
 -27  18   3 54345.3 2125.14   3
 -27  18   6-41.3555 622.091   3
 -18  27   6 645.753 542.778   3
 -19  27  -7 4978.52 553.572   4
  -8 -19  -7 3935.60 557.533   6
 -27  19  -7 5062.15 560.501   6
 -19  27  -7 3767.89 647.450   6
  -8 -19  -7 4614.64 596.688   5
   8 -27  -7 4073.96 648.954   5
 -19  27  -4 11014.8 785.345   4
  -8 -19  -4 9697.61 771.127   6
   8 -27  -4 11079.1 1096.66   5
  -8 -19  -4 8418.97 855.641   5
 -27  19  -1 539.696 524.496   3
 -27  19  -1 1378.99 1245.62   2
  -8 -19  -1 570.557 420.028   6
  19   8  -1 334.958 942.362   1
 -19  27  -1 1062.14 499.805   3
  -8 -19  -1 492.561 524.922   5
   8 -27  -1 1560.03 640.420   5
 -27  19   2 6560.07 867.122   3
  -8 -19   2 6467.97 746.408   5
 -19  27   2 7355.12 894.933   3
 -27  19   5 6694.90 888.964   3
 -19  27   5 6405.03 854.377   3
 -27  19   8 58.6671 388.541   3
  -7 -20  -8-68.2317 331.542   6
 -27  20  -8 127.671 351.436   6
 -20  27  -8 597.219 460.881   6
   7 -27  -8 1012.07 413.740   5
  -7 -20  -5 2942.67 534.659   6
 -20  27  -5 2977.94 506.236   4
  -7 -20  -5 2477.08 633.198   5
   7 -27  -5 2365.50 713.376   5
  -7 -20  -2 1089.16 443.871   6
  -7 -20  -2 1357.55 560.897   5
   7 -27  -2 2152.31 696.448   5
 -20  27   1 16950.2 1191.23   3
 -27  20   1 16577.3 1147.67   3
  -7 -20   1 18888.1 1145.33   5
 -20  27   4 23408.3 1372.02   3
 -27  20   4 23912.6 1397.71   3
 -20  27   7 1267.56 522.052   3
 -27  20   7 424.420 478.031   3
  -6 -21  -9 3061.69 302.751   6
 -21  27  -9 4634.31 465.327   6
 -21  27  -6 6558.77 594.795   4
  -6 -21  -6 6131.41 634.777   6
 -27  21  -6 5622.29 568.660   6
 -21  27  -6 6933.84 739.033   6
  -6 -21  -6 6115.11 699.728   5
   6 -27  -6 5695.61 758.730   5
  -6 -21  -3 4287.63 557.158   6
 -21  27  -3 6411.57 617.965   4
  -6 -21  -3 4441.05 704.743   5
   6 -27  -3 5165.26 854.572   5
 -27  21   0 1951.30 605.648   3
 -21  27   0 1693.68 593.149   3
  -6 -21   0 2748.60 690.068   5
   6 -27   0 1956.23 592.537   5
 -21  27   3 15086.8 1134.44   3
 -27  21   3 13920.3 1097.76   3
 -21  27   6 5082.94 737.199   3
 -27  21   6 4378.88 763.577   3
  -5 -22  -7 2533.71 426.082   6
 -27  22  -7 2130.99 438.013   6
 -22  27  -7 3104.26 565.948   6
  -5 -22  -7 2291.98 458.046   5
   5 -27  -7 3437.93 571.063   5
 -22  27  -4 56310.7 1743.27   4
  -5 -22  -4 50889.2 1692.79   6
 -22  27  -4 51299.4 1827.90   6
  -5 -22  -4 51782.7 1930.63   5
   5 -27  -4 53431.1 2145.84   5
 -22  27  -1 12865.4 975.809   3
  -5 -22  -1 13444.0 1029.94   5
   5 -27  -1 13306.7 1045.06   5
 -22  27   2 7661.72 881.967   3
 -27  22   2 7765.04 864.351   3
 -22  27   5 3889.76 716.987   3
 -27  22   5 4257.34 765.567   3
 -27  22   8 12789.5 764.036   3
  -4 -23  -8 1918.73 325.288   6
 -27  23  -8 4085.13 468.602   6
 -23  27  -8 4313.21 497.712   6
   4 -27  -8 2784.36 427.689   5
  -4 -23  -5 25948.7 1155.10   6
 -23  27  -5 27626.6 1274.02   6
  -4 -23  -5 27215.8 1352.52   5
   4 -27  -5 26859.7 1433.06   5
  -4 -23  -2 4436.07 575.113   6
 -23  27  -2 5574.37 586.733   4
  -4 -23  -2 5463.01 738.397   5
   4 -27  -2 4336.96 781.695   5
  -4 -23   1-248.967 537.562   5
 -23  27   1-10.9814 555.373   3
   4 -27   1 553.296 532.315   5
 -27  23   1 311.628 605.993   3
 -23  27   4 2736.48 702.939   3
 -27  23   4 3271.85 736.776   3
 -23  27   7 1909.33 504.537   3
 -27  23   7 818.649 513.738   3
 -24  27  -9 13.1000 262.576   6
  -3 -24  -6 1642.83 442.349   6
 -24  27  -6 2976.81 532.143   6
  -3 -24  -6 2916.03 615.068   5
   3 -27  -6 2208.00 591.552   5
  -3 -24  -3 8883.62 694.992   6
  -3 -24  -3 10032.5 932.800   5
   3 -27  -3 8913.85 921.925   5
 -24  27   0 23813.3 1324.42   3
 -27  24   0 23865.2 1321.28   3
  -3 -24   0 26226.5 1347.26   5
   3 -27   0 26510.3 1349.99   5
 -24  27   3 991.076 621.248   3
 -27  24   3 2427.72 710.577   3
 -24  27   6 137.318 511.018   3
 -27  24   6-17.1374 623.671   3
 -27  25  -7 4617.31 487.166   6
 -25  27  -7 5630.93 560.194   6
  -2 -25  -7 4726.15 533.241   5
   2 -27  -7 5046.55 560.932   5
  -2 -25  -4 540.360 408.757   6
  -2 -25  -4 948.583 570.454   5
   2 -27  -4 410.565 605.443   5
 -25  27  -1 46500.3 1769.43   3
  -2 -25  -1 48933.3 1906.56   5
   2 -27  -1 52395.1 1955.08   5
 -25  27   2 1462.44 627.660   3
 -27  25   2 2220.05 644.542   3
 -25  27   5 3649.65 699.782   3
 -27  25   5 3093.38 674.214   3
 -27  25   8 3346.06 422.606   3
 -27  26  -8 1783.68 327.017   6
 -26  27  -8 1337.60 312.903   6
  -1 -26  -5 2962.10 648.313   5
   1 -27  -5 3798.03 707.938   5
  -1 -26  -2 4297.67 757.389   5
   1 -27  -2 4450.67 759.437   5
 -26  27   1 20866.3 1263.48   3
 -27  26   1 21793.1 1275.81   3
  -1 -26   1 24699.3 1251.15   5
   1 -27   1 23717.4 1219.16   5
 -26  27   4 11854.3 982.404   3
 -27  26   4 11502.4 982.376   3
 -26  27   7 2178.52 478.765   3
 -27  26   7 1755.22 482.313   3
   0 -27  -6 657.771 468.040   5
   0 -27  -3-212.037 631.535   5
 -27  27   0 22462.8 1239.51   3
   0 -27   0 25055.5 1302.46   5
 -27  27   3-924.724 653.127   3
 -27  27   6 2663.72 584.414   3
   0  28  -7-142.494 258.905   4
 -28   0  -7 591.856 260.528   6
  28 -28  -7-381.223 339.878   5
  28 -28  -4 3812.81 737.053   5
   0  28  -4 4317.12 471.232   4
 -28   0  -1-272.984 544.736   3
   0  28  -1-362.224 378.893   4
 -28   0   2 28341.3 1548.56   3
 -28   0   5-490.898 573.386   3
  -1  28  -8 379.514 243.513   4
   1  27  -8 379.838 237.087   4
 -27  -1  -8 441.588 237.826   6
 -28   1  -8 598.108 240.231   6
  -1  28  -8-20.3482 272.980   6
  27 -28  -5 715.558 533.216   5
  28 -27  -5 375.269 550.179   5
   1  27  -5 1961.02 397.113   4
  -1  28  -5 1689.90 393.216   4
 -27  -1  -5 1183.51 374.844   6
   1  27  -2 24811.9 1058.03   4
  -1  28  -2 23599.1 1061.96   4
 -28   1  -2 23060.0 1249.34   3
 -27  -1  -2 23542.1 1304.04   3
 -28   1   1 7139.87 905.780   3
 -27  -1   1 7257.95 937.358   3
 -28   1   4 4954.07 791.539   3
 -27  -1   4 5680.29 837.758   3
 -28   1   7 2763.69 451.758   3
 -27  -1   7 2888.65 449.339   3
  26 -28  -6 4881.11 685.771   5
  28 -26  -6 4227.62 613.178   5
   2  26  -6 5537.53 506.151   4
 -28   2  -6 4869.05 460.325   6
  -2  28  -6 5082.79 499.815   4
 -26  -2  -6 4876.15 502.248   6
  26 -28  -3 3942.24 752.464   5
   2  26  -3 4552.04 526.184   4
  -2  28  -3 4460.81 523.208   4
 -28   2   0 3955.02 800.480   3
 -26  -2   0 3363.93 780.757   3
  -2  28   0 3849.86 531.500   4
 -28   2   3 22042.8 1379.84   3
 -26  -2   3 22660.7 1434.93   3
 -28   2   6 2683.06 595.749   3
 -26  -2   6 2236.89 554.900   3
  28 -25  -7 1550.12 437.174   5
   3  25  -7 1957.78 342.989   4
  -3  28  -7 1984.08 389.670   4
 -25  -3  -7 1897.89 399.974   6
 -28   3  -7 1947.96 342.202   6
  25 -28  -7 2976.45 501.032   5
  25 -28  -4-83.7549 683.922   5
   3  25  -4 668.219 374.166   4
 -25  -3  -4 483.630 392.876   6
  -3  28  -4 791.763 402.151   4
  -3  28  -1 16742.6 921.847   4
 -28   3  -1 16695.9 1191.12   3
 -25  -3  -1 17266.6 1259.17   3
 -28   3   2 4587.78 842.907   3
 -25  -3   2 5015.48 869.762   3
 -28   3   5 2352.92 668.145   3
 -25  -3   5 1641.66 619.901   3
   4  24  -8 5583.21 410.444   4
  -4  28  -8 6656.40 500.913   4
 -24  -4  -8 5576.45 490.309   6
 -28   4  -8 4985.15 422.747   6
  24 -28  -8 6549.67 523.976   5
  24 -28  -5-139.976 594.892   5
   4  24  -5-82.1900 345.826   4
  -4  28  -5-121.549 385.735   4
 -24  -4  -5 488.387 390.347   6
  -4  28  -2 38422.2 1418.76   4
 -24  -4  -2 39183.7 1804.63   5
  24 -28  -2 37395.5 1698.47   5
 -24  -4  -2 35105.1 1727.19   3
 -28   4   1 3297.07 759.518   3
 -24  -4   1 2910.07 781.126   3
 -28   4   4 10229.9 1036.97   3
 -24  -4   4 10574.5 1068.76   3
 -28   4   7 12295.8 836.190   3
 -24  -4   7 13853.9 818.167   3
  -5  28  -9 1934.08 306.367   4
 -23  -5  -9 1618.06 297.717   6
  -5  28  -9 947.202 387.674   6
   5  23  -6 12673.0 722.631   4
  -5  28  -6 11555.4 769.950   4
 -23  -5  -6 11466.2 757.037   6
 -28   5  -6 10211.7 666.674   6
  23 -28  -6 12474.3 956.753   5
  23 -28  -3 3515.01 773.016   5
 -23  -5  -3 5011.94 575.225   6
  -5  28  -3 5314.60 594.382   4
 -23  -5  -3 4924.09 813.600   5
 -23  -5   0 59245.9 2285.65   5
 -28   5   0 60187.3 2296.62   3
  23 -28   0 57447.6 2004.59   5
 -23  -5   0 59442.8 2327.23   3
 -28   5   3 26987.3 1525.93   3
 -23  -5   3 28036.5 1624.07   3
 -28   5   6 1993.91 603.200   3
 -23  -5   6 1366.22 576.191   3
  28 -22  -7 2362.55 474.894   5
  -6  28  -7 2396.45 451.252   4
 -22  -6  -7 2544.91 512.979   6
 -28   6  -7 2393.34 385.892   6
  22 -28  -7 3590.36 625.504   5
  -6  28  -4 23100.4 1104.84   4
 -22  -6  -4 22669.6 1079.83   6
 -22  -6  -4 21752.1 1325.97   5
  22 -28  -4 22939.9 1357.15   5
 -22  -6  -1 41389.4 1833.60   5
 -28   6  -1 41392.9 1793.79   3
  22 -28  -1 40188.1 1717.37   5
 -28   6   2 4833.96 780.319   3
 -22  -6   2 5241.78 913.036   3
 -28   6   5 243.919 600.276   3
 -22  -6   5-378.170 617.222   3
  -7  28  -8 1224.35 398.387   4
 -21  -7  -8 970.458 394.520   6
 -28   7  -8 1350.27 321.934   6
  21 -28  -8 1070.03 414.809   5
  21 -28  -5 7579.82 884.343   5
  -7  28  -5 8524.02 730.329   4
 -21  -7  -5 7536.23 735.679   6
 -21  -7  -5 6900.26 786.692   5
  21 -28  -2 3841.14 713.252   5
  -7  28  -2 4938.14 598.601   4
 -21  -7  -2 5526.82 860.832   5
 -21  -7  -2 5420.19 606.089   6
 -28   7   1 2909.18 714.650   3
 -21  -7   1 3629.11 729.692   5
 -28   7   4 4784.31 814.045   3
 -21  -7   4 5264.99 892.356   3
 -28   7   7 18021.5 1036.95   3
  -8  28  -9 1445.73 330.839   4
 -20  -8  -9 1597.16 332.807   6
 -28   8  -9 757.556 278.050   6
  -8  28  -9 1766.59 392.713   6
  -8  28  -6 5897.21 625.171   4
 -20  -8  -6 5986.38 641.836   6
 -28   8  -6 4928.33 520.810   6
  20 -28  -6 5975.21 810.579   5
  20 -28  -3 8514.93 942.140   5
  -8  28  -3 10111.8 766.882   4
 -20  -8  -3 8569.15 725.128   6
 -20  -8  -3 9164.19 923.072   5
 -20  -8   0 37004.9 1700.32   5
 -28   8   0 37601.6 1729.13   3
  20 -28   0 36120.3 1571.09   5
 -28   8   3 7620.46 943.603   3
 -20  -8   3 8121.61 1019.14   3
 -28   8   6 3981.88 714.843   3
 -20  -8   6 2342.40 607.999   3
  -9  28  -7 2676.81 513.014   4
 -19  -9  -7 2918.78 544.328   6
 -28   9  -7 1702.21 413.372   6
  19 -28  -7 2852.58 581.971   5
  -9  28  -4 31918.3 1363.16   4
 -19  -9  -4 30689.5 1290.27   6
 -19  -9  -4 29736.9 1519.79   5
  19 -28  -4 29838.0 1610.58   5
 -19  -9  -1 41716.2 1509.86   6
 -19  -9  -1 40282.6 1780.97   5
 -28   9  -1 40434.5 1762.62   3
  19 -28  -1 39504.1 1754.46   5
 -28   9   2 7116.06 880.190   3
 -19  -9   2 5052.62 775.322   5
 -28   9   5 10921.9 1038.44   3
 -19  -9   5 8713.09 943.237   3
 -10  28  -8 956.272 412.848   4
 -18 -10  -8 986.017 411.122   6
 -28  10  -8 462.560 339.181   6
 -10  28  -8-30.8149 473.471   6
  18 -28  -8 586.563 416.621   5
 -10  28  -5 23185.8 1141.38   4
 -18 -10  -5 23342.9 1147.50   6
 -18 -10  -5 24521.4 1321.82   5
  18 -28  -5 22289.9 1416.32   5
 -18 -10  -2 21705.4 1107.12   6
 -18 -10  -2 20666.5 1288.87   5
  18 -28  -2 21508.3 1342.37   5
  10  18   1 11754.3 1800.70   1
 -18 -10   1 10648.5 1023.42   5
 -28  10   1 11180.3 1007.25   3
 -28  10   4 2947.26 746.176   3
 -18 -10   4 1400.45 672.469   3
 -28  10   7 9386.59 827.635   3
 -11  28  -9 2281.39 386.110   4
 -17 -11  -9 2444.58 378.309   6
 -28  11  -9 2766.59 361.885   6
 -11  28  -9 1684.41 446.158   6
 -11  28  -6-12.2508 443.876   4
 -17 -11  -6 762.212 520.484   6
 -28  11  -6 583.764 336.846   6
 -17 -11  -6-303.550 479.185   5
  17 -28  -6 304.059 642.065   5
 -17 -11  -3 200.881 443.482   6
 -11  28  -3 3.11657 442.965   4
 -17 -11  -3 635.795 622.012   5
  17 -28  -3 234.408 604.083   5
 -28  11   0 3594.61 746.470   3
 -17 -11   0 3301.99 519.454   6
 -17 -11   0 3464.53 721.647   5
  11  17   0 2904.23 1118.30   1
  17 -28   0 3980.34 670.051   5
 -28  11   3 2715.73 696.329   3
 -17 -11   3 3967.37 672.178   5
 -28  11   6 1868.10 622.065   3
 -17 -11   6 3136.83 653.448   3
 -12  28  -7 4085.30 575.995   4
 -16 -12  -7 3561.25 599.723   6
 -28  12  -7 3164.09 456.198   6
  16 -28  -7 3776.04 694.029   5
 -16 -12  -4 6468.85 712.116   6
 -12  28  -4 5320.49 651.346   4
 -16 -12  -4 5221.53 778.786   5
  16 -28  -4 6783.06 920.121   5
 -16 -12  -1 10920.2 787.806   6
  12  16  -1 9963.27 1602.91   1
 -16 -12  -1 10855.1 945.353   5
 -28  12  -1 10981.9 951.349   3
  16 -28  -1 10365.2 983.397   5
 -16 -12   2 13652.7 1031.58   5
 -28  12   2 13831.6 1104.46   3
 -28  12   5 8411.44 962.626   3
 -16 -12   5 9362.96 981.427   3
 -28  12   8 1422.16 429.698   3
 -13  28  -8 4404.32 527.351   4
 -15 -13  -8 3776.25 512.053   6
 -28  13  -8 3889.60 458.180   6
 -13  28  -8 4195.09 647.115   6
  15 -28  -8 3436.15 530.572   5
 -13  28  -5 17417.3 1027.25   4
 -15 -13  -5 17487.4 1033.58   6
 -15 -13  -5 17445.8 1132.80   5
  15 -28  -5 18791.5 1257.59   5
 -15 -13  -2 4010.37 580.684   6
 -15 -13  -2 3846.39 752.783   5
 -13  28  -2 6318.52 1864.88   2
  15 -28  -2 3978.20 824.508   5
  13  15   1 6804.79 1463.52   1
 -28  13   1 7336.56 883.846   3
 -15 -13   1 8919.70 871.380   5
 -28  13   4 4056.00 812.320   3
 -28  13   7 2605.71 591.116   3
 -14  28  -9 4703.06 453.733   4
 -14 -14  -9 4897.67 432.426   6
 -28  14  -9 4175.18 403.847   6
 -14  28  -9 4953.99 544.437   6
 -14  28  -6 4673.54 619.815   4
 -14 -14  -6 5139.98 685.866   6
 -14 -14  -6 5334.38 709.988   5
  14 -28  -6 5570.54 800.544   5
 -14 -14  -3 3872.95 599.786   6
 -14  28  -3 4242.45 596.174   4
 -14 -14  -3 3498.32 697.414   5
  14 -28  -3 3508.89 829.133   5
 -28  14   0 4695.60 710.095   3
 -14 -14   0 4858.97 592.444   6
  14  14   0 4062.67 1228.34   1
 -14 -14   0 5313.12 762.179   5
  14 -28   0 4664.64 739.270   5
 -28  14   3 2895.28 730.683   3
 -14  28   3 4106.50 814.841   3
 -28  14   6 5470.70 786.544   3
 -15  28  -7 2979.55 507.993   4
 -28  15  -7 3157.23 483.302   6
 -13 -15  -7 2983.12 557.458   6
  13 -28  -7 3557.95 671.454   5
 -13 -15  -4 3217.85 601.801   6
 -15  28  -4 4451.86 597.052   4
 -13 -15  -4 2940.29 648.030   5
  13 -28  -4 5386.71 907.672   5
 -28  15  -1 7152.17 797.492   3
  15  13  -1 7078.22 1506.78   1
 -13 -15  -1 8083.64 700.964   6
  13 -28  -1 8103.31 954.782   5
 -13 -15  -1 8112.65 900.081   5
 -28  15   2 4564.64 746.494   3
 -13 -15   2 4600.25 687.271   5
 -15  28   2 5584.92 903.196   3
 -28  15   5 15652.3 1193.06   3
 -13 -15   5 18517.6 1200.67   3
 -28  15   8 4752.76 557.387   3
 -16  28  -8 1354.80 388.114   4
 -12 -16  -8 1393.47 398.743   6
 -16  28  -8 1101.17 489.185   6
  12 -28  -8 632.239 415.526   5
 -16  28  -5 9780.60 755.116   4
 -12 -16  -5 8730.72 793.209   6
 -12 -16  -5 9300.94 885.787   5
  12 -28  -5 8056.62 984.195   5
 -12 -16  -2 13895.8 911.650   6
 -12 -16  -2 13245.9 996.404   5
  12 -28  -2 14746.3 1196.77   5
 -16  28   1 11276.4 1029.74   3
 -12 -16   1 11310.0 951.099   5
 -28  16   1 10751.9 1000.45   3
 -28  16   4 5815.84 868.535   3
 -16  28   4 5529.38 875.860   3
 -28  16   7 3309.59 604.663   3
 -17  28  -9 2514.18 341.833   4
 -11 -17  -9 1935.14 325.606   6
 -28  17  -9 2740.10 346.490   6
 -17  28  -6 2714.59 524.189   4
 -11 -17  -6 2907.89 579.113   6
 -11 -17  -6 2478.32 595.608   5
  11 -28  -6 2468.91 727.621   5
 -11 -17  -3 3306.62 577.688   6
 -17  28  -3 4894.48 629.027   4
 -11 -17  -3 3608.82 643.858   5
  11 -28  -3 4133.11 818.358   5
 -28  17   0 2923.35 658.259   3
  17  11   0 2633.82 1200.82   1
 -11 -17   0 3612.31 544.677   6
 -17  28   0 4147.00 737.740   3
 -11 -17   0 3781.91 705.215   5
  11 -28   0 3689.63 705.215   5
 -28  17   3 325.639 620.528   3
 -17  28   3 957.018 677.035   3
 -28  17   6 653.273 609.560   3
 -18  28  -7 8544.06 674.479   4
 -10 -18  -7 8402.06 684.715   6
 -28  18  -7 8465.10 651.398   6
 -18  28  -7 8202.08 777.575   6
 -10 -18  -7 8457.44 686.383   5
  10 -28  -7 7002.45 722.406   5
 -10 -18  -4 1949.45 514.744   6
 -18  28  -4 2269.61 532.702   4
 -10 -18  -4 1861.97 602.364   5
  10 -28  -4 3304.02 831.900   5
 -28  18  -1 12253.6 2075.74   2
 -10 -18  -1 11178.5 820.706   6
 -18  28  -1 11424.9 912.902   3
 -28  18  -1 11740.8 937.464   3
 -10 -18  -1 12084.9 997.811   5
  10 -28  -1 12469.5 1041.96   5
  18  10  -1 8819.08 1571.09   1
 -18  28   2 22504.4 1370.62   3
 -10 -18   2 23674.4 1251.75   5
 -28  18   2 21346.3 1341.54   3
 -18  28   5 22637.0 1307.01   3
 -28  18   5 23777.0 1378.23   3
 -28  18   8 228.416 363.550   3
 -19  28  -8 5538.98 495.277   4
 -28  19  -8 6526.54 524.910   6
  -9 -19  -8 4606.96 474.100   6
 -19  28  -8 5540.46 580.396   6
   9 -28  -8 5517.46 558.030   5
 -19  28  -5 10305.9 760.161   4
  -9 -19  -5 10231.5 794.149   6
   9 -28  -5 10089.0 1023.90   5
  -9 -19  -5 8210.35 866.141   5
  -9 -19  -2 5803.34 634.514   6
  -9 -19  -2 4567.43 748.768   5
   9 -28  -2 6929.44 914.786   5
 -19  28   1 41403.8 1822.89   3
 -28  19   1 41401.9 1804.47   3
  -9 -19   1 43687.8 1785.25   5
 -19  28   4 28033.7 1510.36   3
 -28  19   4 29392.0 1550.20   3
 -28  19   7 2758.80 575.039   3
  -8 -20  -9 314.347 221.091   6
 -28  20  -9 1258.46 302.659   6
 -20  28  -9 1175.55 349.820   6
 -20  28  -6 3293.04 473.837   4
  -8 -20  -6 2312.89 514.713   6
 -20  28  -6 3720.81 632.399   6
  -8 -20  -6 3278.46 628.414   5
   8 -28  -6 2338.45 680.020   5
 -20  28  -3 7550.27 723.196   4
  -8 -20  -3 6240.85 665.729   6
  -8 -20  -3 6706.29 784.427   5
 -20  28   0 38009.4 1672.91   3
 -28  20   0 37559.1 1661.03   3
  -8 -20   0 39982.0 1704.85   5
   8 -28   0 37097.9 1645.34   5
 -28  20   3 8465.63 928.224   3
 -20  28   3 8090.04 930.353   3
 -20  28   6 5990.63 771.783   3
 -28  20   6 6296.15 782.218   3
 -21  28  -7 15731.5 768.474   4
  -7 -21  -7 14636.2 792.566   6
 -28  21  -7 15527.8 797.729   6
 -21  28  -7 14852.9 890.680   6
  -7 -21  -7 14895.8 854.134   5
   7 -28  -7 15856.6 944.283   5
  -7 -21  -4 4027.16 571.285   6
 -21  28  -4 5596.75 599.555   4
  -7 -21  -4 4156.98 708.911   5
   7 -28  -4 4609.23 858.481   5
  -7 -21  -1 2821.60 520.242   6
 -21  28  -1 4669.87 677.865   3
  -7 -21  -1 4249.92 739.923   5
   7 -28  -1 4395.34 795.025   5
 -28  21   2 4605.74 753.377   3
  -7 -21   2 6217.91 729.609   5
 -21  28   2 6541.59 859.535   3
 -21  28   5 8565.46 916.806   3
 -28  21   5 8384.89 939.452   3
 -28  21   8 270.275 351.932   3
 -28  22  -8 5433.16 472.669   6
  -6 -22  -8 3707.28 389.041   6
 -22  28  -8 6068.84 528.778   6
   6 -28  -8 4530.83 479.736   5
  -6 -22  -5-761.610 459.792   6
 -22  28  -5 421.212 367.043   4
 -22  28  -5 629.989 482.399   6
  -6 -22  -5 1194.17 577.043   5
   6 -28  -5 668.127 623.729   5
 -22  28  -2 6578.25 634.762   4
  -6 -22  -2 4957.28 606.523   6
  -6 -22  -2 5417.93 758.746   5
   6 -28  -2 5287.17 829.660   5
 -22  28   1 39185.5 1758.63   3
 -28  22   1 39836.5 1758.77   3
  -6 -22   1 44460.5 1788.87   5
 -22  28   4 20665.7 1304.16   3
 -28  22   4 22799.6 1346.70   3
 -22  28   7 3022.00 570.363   3
 -28  22   7 2176.09 529.390   3
 -23  28  -9-52.7932 260.298   6
  -5 -23  -6 1037.02 403.142   6
 -23  28  -6 1035.10 468.656   6
  -5 -23  -6 311.976 483.396   5
   5 -28  -6 751.835 538.223   5
 -23  28  -3 28243.5 1200.57   4
  -5 -23  -3 26953.1 1169.10   6
  -5 -23  -3 26352.8 1363.32   5
   5 -28  -3 28806.8 1509.10   5
 -23  28   0 58768.9 2156.31   3
 -28  23   0 60836.3 2170.32   3
  -5 -23   0 64615.9 2223.03   5
   5 -28   0 63299.1 2184.49   5
 -23  28   3 4594.84 792.029   3
 -28  23   3 4717.49 761.063   3
 -23  28   6 11843.8 925.824   3
 -28  23   6 10019.5 898.924   3
  -4 -24  -7 9758.76 633.759   6
 -24  28  -7 12583.3 732.947   6
  -4 -24  -7 12285.3 746.601   5
   4 -28  -7 11607.8 760.277   5
  -4 -24  -4 9042.76 703.245   6
  -4 -24  -4 9733.60 901.216   5
   4 -28  -4 9567.79 950.483   5
 -24  28  -1 3100.45 587.964   3
  -4 -24  -1 3419.96 702.832   5
   4 -28  -1 2037.15 632.907   5
 -24  28   2 35872.8 1686.70   3
 -28  24   2 38505.1 1724.25   3
 -24  28   5 365.397 580.608   3
 -28  24   5 351.398 599.631   3
 -28  24   8 6494.01 515.888   3
 -28  25  -8 1792.70 321.131   6
 -25  28  -8 1327.68 309.922   6
   3 -28  -8 1377.07 329.663   5
  -3 -25  -5 1006.49 402.384   6
  -3 -25  -5 2384.20 604.828   5
   3 -28  -5 2114.75 660.455   5
  -3 -25  -2 4710.35 718.983   5
   3 -28  -2 4829.72 752.727   5
 -25  28   1 16673.4 1119.64   3
 -28  25   1 15895.0 1137.03   3
  -3 -25   1 19520.9 1154.80   5
   3 -28   1 21477.9 1143.71   5
 -25  28   4 488.392 592.972   3
 -28  25   4 886.947 644.250   3
 -25  28   7 2273.84 516.055   3
 -28  25   7 1545.55 457.111   3
  -2 -26  -6 2228.05 501.105   5
   2 -28  -6 2125.78 555.237   5
  -2 -26  -3 20744.5 1240.31   5
   2 -28  -3 21872.7 1303.00   5
 -26  28   0 3832.90 669.449   3
  -2 -26   0 4409.97 736.148   5
   2 -28   0 5093.00 730.927   5
 -28  26   0 3677.44 650.043   3
 -26  28   3 3609.19 718.827   3
 -28  26   3 3581.58 714.989   3
 -26  28   6 4435.59 630.591   3
 -28  26   6 4686.66 660.059   3
  -1 -27  -7 2899.16 456.566   5
   1 -28  -7 2096.16 395.738   5
  -1 -27  -4 5168.64 795.934   5
   1 -28  -4 4591.10 783.379   5
  -1 -27  -1 7853.88 820.517   5
   1 -28  -1 8051.10 833.353   5
 -27  28   2 22452.5 1289.98   3
 -28  27   2 23958.2 1315.82   3
 -27  28   5 1081.57 557.889   3
 -28  27   5 1155.95 558.121   3
   0 -28  -5 320.293 538.679   5
   0 -28  -2 25105.6 1333.48   5
   0 -28   1-141.939 449.151   5
 -28  28   1-424.623 584.621   3
 -28  28   4 4299.39 714.084   3
 -28  28   7 577.800 405.702   3
  29 -29  -5-256.303 482.627   5
   0  29  -5 51.9966 276.434   4
   0  29  -2 15964.5 797.773   4
 -29   0   1-109.368 602.212   3
 -29   0   4 12223.9 1005.40   3
 -29   0   7-381.526 313.369   3
   1  28  -6 7444.15 490.471   4
  -1  29  -6 7723.28 519.316   4
 -28  -1  -6 5345.23 428.474   6
  29 -28  -6 6403.77 657.258   5
  28 -29  -6 6588.64 666.399   5
  28 -29  -3 9242.00 937.056   5
   1  28  -3 9731.53 643.746   4
  -1  29  -3 9565.77 630.864   4
  28 -29   0 2912.37 548.990   5
 -29   1   0 4575.89 789.051   3
 -28  -1   0 3550.61 724.222   3
  -1  29   0 3951.31 526.416   4
 -29   1   3 586.031 632.251   3
 -28  -1   3-102.633 643.885   3
 -29   1   6 2162.72 531.867   3
 -28  -1   6 2854.73 536.095   3
   2  27  -7 2112.53 319.703   4
  -2  29  -7 2269.34 350.279   4
 -27  -2  -7 1714.68 303.678   6
 -29   2  -7 1981.92 290.294   6
  27 -29  -7 2357.01 430.367   5
  29 -27  -7 1961.39 404.729   5
  27 -29  -4-720.791 613.218   5
   2  27  -4 384.758 332.408   4
  -2  29  -4-33.2347 351.824   4
  -2  29  -1 16368.8 888.628   4
 -29   2  -1 14515.5 1072.12   3
 -27  -2  -1 15766.9 1160.86   3
  27 -29  -1 14730.5 1029.14   5
 -29   2   2 14866.3 1179.46   3
 -27  -2   2 15142.3 1212.86   3
 -29   2   5 13648.7 1003.01   3
 -27  -2   5 13584.0 1006.10   3
  -3  29  -8 728.046 256.039   4
 -26  -3  -8 773.164 256.028   6
  -3  29  -8 1154.76 317.235   6
  26 -29  -5 7370.06 813.114   5
  29 -26  -5 6331.97 735.656   5
   3  26  -5 8240.90 580.113   4
  -3  29  -5 6988.16 592.329   4
 -26  -3  -5 6249.16 561.762   6
  26 -29  -2 35.2637 603.875   5
 -26  -3  -2 441.101 580.415   3
  -3  29  -2-109.268 376.702   4
 -29   3   1 1949.94 694.321   3
 -26  -3   1 2099.97 728.160   3
 -29   3   4 2484.94 733.579   3
 -26  -3   4 2315.58 674.182   3
 -29   3   7 1633.51 440.172   3
 -26  -3   7 1467.21 392.315   3
  29 -25  -6-283.663 463.625   5
  -4  29  -6-177.928 332.745   4
 -25  -4  -6 315.680 344.661   6
  25 -29  -6 439.590 463.464   5
  25 -29  -3-321.155 589.401   5
  -4  29  -3 265.322 377.173   4
 -29   4   0 21610.3 1351.21   3
  25 -29   0 20716.5 1137.76   5
 -25  -4   0 21062.3 1398.36   3
 -29   4   3 1412.49 651.303   3
 -25  -4   3 1428.20 915.919   3
 -29   4   6 3229.30 610.403   3
 -25  -4   6 3227.65 574.216   3
  29 -24  -7 4779.73 540.307   5
  -5  29  -7 4721.20 475.466   4
 -24  -5  -7 4564.62 482.181   6
 -29   5  -7 3982.51 399.323   6
  24 -29  -7 5109.30 583.164   5
  24 -29  -4 8822.28 967.449   5
  -5  29  -4 10011.8 718.673   4
 -24  -5  -4 8986.46 680.284   6
  24 -29  -1 6032.68 796.457   5
  -5  29  -1 7263.94 664.368   4
 -29   5  -1 6812.69 841.336   3
 -24  -5  -1 6242.28 905.110   3
 -24  -5  -1 6748.86 931.510   5
 -29   5   2 25971.7 1519.79   3
 -24  -5   2 26318.2 1570.45   3
 -29   5   5 12508.0 1058.14   3
 -24  -5   5 12457.1 1046.61   3
  -6  29  -8 1545.65 343.736   4
 -23  -6  -8 1876.20 352.311   6
 -29   6  -8 1927.22 311.297   6
  -6  29  -8 2593.12 454.618   6
  23 -29  -8 1980.51 382.512   5
  23 -29  -5 3960.00 751.243   5
 -23  -6  -5 3982.02 553.219   6
  -6  29  -5 4694.47 575.838   4
  23 -29  -2 8720.35 926.271   5
  -6  29  -2 10017.0 741.701   4
 -23  -6  -2 10411.2 1001.65   5
 -23  -6  -2 10498.0 1019.79   3
 -23  -6   1 9900.15 1052.82   3
 -29   6   1 11445.0 1069.30   3
 -29   6   4 30200.7 1577.32   3
 -23  -6   4 29322.1 1598.61   3
 -29   6   7 11802.2 793.053   3
  -7  29  -9 1399.45 288.044   4
 -22  -7  -9 953.058 253.238   6
  -7  29  -6 1656.50 478.423   4
 -22  -7  -6 1847.49 473.247   6
  22 -29  -6 1946.33 622.374   5
  22 -29  -3 8838.14 952.878   5
  -7  29  -3 9746.73 748.551   4
 -22  -7  -3 8309.84 719.758   6
 -22  -7  -3 9903.12 983.952   5
 -22  -7   0 13854.6 1111.51   5
 -29   7   0 13416.1 1092.25   3
  22 -29   0 13192.1 957.409   5
 -29   7   3 14240.5 1167.36   3
 -22  -7   3 12670.6 1151.07   3
 -29   7   6 1241.50 578.256   3
 -22  -7   6 1154.94 531.547   3
  29 -21  -7 3869.52 533.970   5
  -8  29  -7 3890.41 521.470   4
 -21  -8  -7 3560.85 534.242   6
 -29   8  -7 3340.66 411.684   6
  21 -29  -7 5192.96 640.110   5
  21 -29  -4 2049.24 738.981   5
 -21  -8  -4 2956.43 529.675   6
  -8  29  -4 2606.85 540.204   4
 -21  -8  -4 2399.98 716.636   5
 -21  -8  -1 15570.8 1177.82   5
 -29   8  -1 14322.3 1079.93   3
  21 -29  -1 15415.4 1075.58   5
 -29   8   2 1404.14 647.781   3
 -21  -8   2 2186.96 739.292   3
 -29   8   5 7918.38 895.670   3
 -21  -8   5 8454.81 923.868   3
 -20  -9  -8 4916.84 511.928   6
 -29   9  -8 5083.76 411.036   6
  -9  29  -8 5357.32 509.214   4
  -9  29  -8 5458.27 623.737   6
  20 -29  -8 4992.58 506.924   5
 -20  -9  -5 3646.92 569.607   6
  -9  29  -5 3055.40 553.408   4
 -20  -9  -5 2973.81 654.009   5
  20 -29  -5 3749.50 766.471   5
  -9  29  -2 36985.6 1427.53   4
 -20  -9  -2 35075.8 1361.68   6
 -20  -9  -2 34398.0 1655.75   5
  20 -29  -2 34114.6 1669.38   5
 -20  -9   1 41741.5 1859.87   5
 -29   9   1 43499.7 1905.57   3
 -29   9   4 11944.4 1058.63   3
 -20  -9   4 12026.3 1101.81   3
 -29   9   7 37923.5 1492.05   3
 -10  29  -9 1715.93 313.275   4
 -19 -10  -9 876.869 277.700   6
 -10  29  -9 1193.07 351.690   6
 -10  29  -6 5860.24 638.396   4
 -19 -10  -6 5084.54 641.407   6
 -19 -10  -6 4435.35 630.069   5
  19 -29  -6 5553.53 771.339   5
 -10  29  -3 49034.0 1711.90   4
 -19 -10  -3 50136.1 1692.53   6
 -19 -10  -3 47168.4 1934.40   5
  19 -29  -3 47954.4 2054.59   5
 -19 -10   0 9919.76 968.035   5
 -29  10   0 11736.3 1029.68   3
  19 -29   0 11235.5 928.116   5
 -29  10   3 6512.91 880.659   3
 -19 -10   3 6182.09 895.667   3
 -29  10   6 4465.59 705.948   3
 -19 -10   6 5266.13 686.458   3
 -11  29  -7 22083.3 999.694   4
 -18 -11  -7 18515.9 1010.41   6
 -29  11  -7 17826.9 810.809   6
  18 -29  -7 22185.4 1140.52   5
 -11  29  -4 16863.0 992.795   4
 -18 -11  -4 16098.7 970.606   6
 -18 -11  -4 15968.2 1146.17   5
  18 -29  -4 17174.9 1242.17   5
 -18 -11  -1 33147.6 1322.90   6
 -18 -11  -1 32302.0 1586.27   5
 -29  11  -1 30996.3 1535.53   3
  18 -29  -1 30259.6 1525.39   5
 -18 -11   2 20747.9 1287.69   5
 -29  11   2 20930.0 1322.55   3
 -29  11   5 4445.91 799.254   3
 -18 -11   5 3997.62 754.839   3
 -29  11   8 11538.2 703.395   3
 -12  29  -8 1338.24 390.157   4
 -17 -12  -8 1972.42 416.636   6
 -29  12  -8 1363.98 322.861   6
 -12  29  -8 1282.67 489.167   6
  17 -29  -8 1804.30 436.779   5
 -17 -12  -5 6584.58 712.680   6
 -12  29  -5 5656.58 650.355   4
 -17 -12  -5 5457.43 754.649   5
  17 -29  -5 5529.54 835.003   5
 -17 -12  -2 1703.38 474.347   6
 -17 -12  -2 2761.13 682.212   5
  17 -29  -2 2604.96 724.614   5
 -17 -12   1 12820.7 1065.92   5
 -29  12   1 13058.6 1085.49   3
 -29  12   4 4123.02 812.718   3
 -17 -12   4 4930.66 795.240   3
 -29  12   7 4977.49 632.195   3
 -13  29  -9 5367.88 446.635   4
 -16 -13  -9 4778.08 405.221   6
 -29  13  -9 5021.26 386.782   6
 -13  29  -9 4565.99 511.537   6
 -13  29  -6 11184.9 827.831   4
 -16 -13  -6 13079.7 885.169   6
 -16 -13  -6 10897.4 858.229   5
  16 -29  -6 12693.3 1031.15   5
 -13  29  -3 42099.6 1564.49   4
 -16 -13  -3 42130.7 1557.42   6
 -16 -13  -3 37904.3 1739.10   5
  16 -29  -3 42484.7 1862.26   5
 -16 -13   0 22777.5 1132.98   6
 -16 -13   0 23235.8 1356.74   5
 -29  13   0 23300.5 1355.17   3
  16 -29   0 22574.2 1278.74   5
 -16 -13   3 27703.5 1380.19   5
 -29  13   3 28619.2 1571.18   3
 -29  13   6 6603.41 814.517   3
 -14  29  -7 19962.1 979.571   4
 -15 -14  -7 21953.2 1025.99   6
 -29  14  -7 18144.7 823.603   6
  15 -29  -7 20330.8 1115.37   5
 -15 -14  -4 1237.89 515.265   6
 -14  29  -4 1132.58 508.290   4
 -15 -14  -4 313.492 549.597   5
  15 -29  -4 2092.31 756.977   5
 -15 -14  -1 19434.1 1041.18   6
 -15 -14  -1 16207.4 1172.79   5
 -29  14  -1 19293.9 1205.04   3
  15 -29  -1 18870.6 1230.83   5
 -29  14   2 2910.38 728.623   3
 -15 -14   2 3921.60 722.712   5
 -29  14   5 22158.8 1313.91   3
 -15 -14   5 21621.6 1311.54   3
 -29  14   8 1770.73 417.394   3
 -15  29  -8 1522.23 415.027   4
 -14 -15  -8 1678.06 409.536   6
 -29  15  -8 1108.77 323.484   6
 -15  29  -8 1388.16 501.913   6
  14 -29  -8-2.51182 390.652   5
 -15  29  -5 20444.6 1080.60   4
 -14 -15  -5 21504.8 1106.07   6
 -14 -15  -5 19062.4 1191.79   5
  14 -29  -5 21504.5 1363.21   5
 -14 -15  -2 2959.54 544.861   6
 -14 -15  -2 2985.37 680.256   5
  14 -29  -2 3520.82 835.558   5
 -14 -15   1 18363.3 1235.97   5
 -29  15   1 18816.4 1242.47   3
 -29  15   4 1272.93 675.586   3
 -29  15   7 20626.4 1098.27   3
 -16  29  -9 1978.62 326.870   4
 -13 -16  -9 1215.86 290.720   6
 -29  16  -9 1700.90 304.393   6
 -16  29  -6 6489.43 626.889   4
 -13 -16  -6 6480.46 713.566   6
 -13 -16  -6 5932.61 712.847   5
  13 -29  -6 6910.37 862.056   5
 -16  29  -3 31323.3 1353.04   4
 -13 -16  -3 30835.6 1340.29   6
 -13 -16  -3 29449.5 1454.56   5
  13 -29  -3 32707.1 1716.03   5
 -13 -16   0 23939.4 1363.99   5
 -29  16   0 22566.7 1317.72   3
  13 -29   0 23426.3 1321.40   5
 -16  29   3 41832.6 1907.54   3
 -29  16   3 39981.4 1824.30   3
 -29  16   6 11464.6 968.697   3
 -17  29  -7 3527.58 500.204   4
 -12 -17  -7 3319.26 520.602   6
 -29  17  -7 3293.45 439.573   6
 -17  29  -7 3361.38 592.924   6
 -12 -17  -7 4681.07 567.504   5
  12 -29  -7 2936.00 595.539   5
 -12 -17  -4 4501.98 637.868   6
 -17  29  -4 4638.28 608.138   4
 -12 -17  -4 4597.10 707.058   5
  12 -29  -4 6397.87 960.029   5
 -12 -17  -1 13129.2 875.621   6
 -29  17  -1 12605.8 979.249   3
 -12 -17  -1 12262.2 1042.84   5
  12 -29  -1 13330.7 1062.28   5
 -29  17   2 2151.02 676.118   3
 -12 -17   2 3177.81 649.501   5
 -17  29   2 3554.84 793.300   3
 -29  17   5 5478.42 827.880   3
 -17  29   5 6967.52 830.883   3
 -29  17   8 351.432 374.563   3
 -18  29  -8 10789.0 619.376   4
 -11 -18  -8 9286.39 597.694   6
 -29  18  -8 9538.91 568.780   6
 -18  29  -8 9723.19 708.888   6
  11 -29  -8 9865.37 675.270   5
 -11 -18  -5 4541.79 630.194   6
 -18  29  -5 4894.68 605.773   4
 -11 -18  -5 3605.84 685.462   5
  11 -29  -5 5130.09 865.228   5
 -11 -18  -2 21061.0 1092.08   6
 -11 -18  -2 20192.4 1237.89   5
  11 -29  -2 23065.9 1399.71   5
 -18  29   1 31768.5 1610.65   3
 -11 -18   1 33820.6 1555.68   5
 -29  18   1 31711.9 1566.55   3
 -18  29   4 17590.2 1206.67   3
 -29  18   4 17027.9 1205.77   3
 -29  18   7 20638.4 1081.31   3
 -10 -19  -9 16983.3 647.430   6
 -19  29  -9 23241.7 830.024   6
 -19  29  -6 4874.40 545.404   4
 -10 -19  -6 4303.78 595.894   6
 -19  29  -6 4010.10 618.497   6
 -10 -19  -6 4706.28 656.818   5
  10 -29  -6 3198.78 724.676   5
 -10 -19  -3 5621.52 669.961   6
 -19  29  -3 5513.98 639.817   4
 -10 -19  -3 5652.70 784.183   5
  10 -29  -3 6158.91 950.216   5
 -19  29   0 10870.9 960.999   3
 -29  19   0 11746.8 992.803   3
  10 -29   0 11995.4 1007.06   5
 -10 -19   0 10056.0 970.460   5
 -19  29   3 46677.9 1970.04   3
 -29  19   3 45587.3 1949.60   3
 -29  19   6 6054.47 773.730   3
 -20  29  -7 34700.7 1193.50   4
  -9 -20  -7 31899.8 1190.96   6
 -20  29  -7 32992.6 1293.60   6
  -9 -20  -7 33022.4 1250.59   5
   9 -29  -7 32309.3 1326.65   5
 -20  29  -4 13887.7 868.187   4
  -9 -20  -4 10750.9 808.916   6
  -9 -20  -4 12520.3 971.393   5
   9 -29  -4 12316.0 1120.33   5
  -9 -20  -1 45191.5 1587.95   6
 -20  29  -1 40933.7 1691.89   3
  -9 -20  -1 45420.1 1860.47   5
   9 -29  -1 43716.5 1837.59   5
 -20  29   2 33895.0 1691.43   3
 -29  20   2 33337.9 1629.87   3
  -9 -20   2 37372.6 1581.16   5
 -20  29   5 3408.91 679.558   3
 -29  20   5 2910.95 671.151   3
 -29  20   8 5342.39 505.751   3
  -8 -21  -8 2439.34 371.364   6
 -21  29  -8 3035.94 440.749   6
   8 -29  -8 2202.34 387.816   5
 -21  29  -5 7397.67 626.302   4
  -8 -21  -5 5997.37 639.484   6
 -21  29  -5 7314.01 707.924   6
  -8 -21  -5 7283.16 804.074   5
   8 -29  -5 7512.99 935.580   5
  -8 -21  -2 2155.31 493.547   6
 -21  29  -2 2585.43 532.151   4
  -8 -21  -2 1850.21 670.447   5
   8 -29  -2 3287.84 782.234   5
 -21  29   1 16084.8 1173.30   3
 -29  21   1 15251.8 1133.40   3
  -8 -21   1 16761.5 1116.39   5
 -29  21   4 2664.34 702.767   3
 -21  29   4 2139.28 667.104   3
 -29  21   7 3930.69 579.307   3
 -22  29  -6 1126.41 358.110   4
  -7 -22  -6 828.620 384.865   6
 -22  29  -6 872.662 476.475   6
  -7 -22  -6 1291.27 486.106   5
   7 -29  -6-39.3869 543.770   5
 -22  29  -3 13971.5 871.127   4
  -7 -22  -3 12762.4 852.044   6
  -7 -22  -3 12573.9 968.921   5
   7 -29  -3 14119.2 1163.45   5
 -22  29   0 12704.7 1012.01   3
 -29  22   0 13438.4 1036.37   3
  -7 -22   0 13917.9 1074.60   5
   7 -29   0 13721.0 1005.00   5
 -22  29   3 8028.38 900.678   3
 -29  22   3 8845.20 927.795   3
 -22  29   6 1814.23 562.542   3
 -29  22   6 2427.18 630.116   3
  -6 -23  -7 9292.94 602.136   6
 -23  29  -7 10883.2 689.761   6
  -6 -23  -7 9135.17 657.502   5
   6 -29  -7 9436.60 723.562   5
 -23  29  -4 29252.0 1174.63   4
  -6 -23  -4 28911.1 1190.32   6
  -6 -23  -4 27853.0 1363.74   5
   6 -29  -4 28279.1 1521.62   5
 -23  29  -1 11122.5 883.184   3
   6 -29  -1 9571.10 934.026   5
  -6 -23  -1 11636.3 959.786   5
 -23  29   2 10649.4 992.292   3
 -29  23   2 9095.97 952.490   3
 -23  29   5 3869.77 663.038   3
 -29  23   5 4553.20 763.287   3
 -29  23   8 2442.80 378.063   3
 -24  29  -8 437.596 287.754   6
   5 -29  -8 863.322 304.246   5
  -5 -24  -5 11404.4 765.699   6
 -24  29  -5 12229.6 811.335   6
  -5 -24  -5 11918.9 896.352   5
   5 -29  -5 11378.9 962.113   5
 -24  29  -2 27847.9 1161.23   4
  -5 -24  -2 28070.8 1390.77   5
   5 -29  -2 29046.7 1476.34   5
  -5 -24   1 6986.73 796.773   5
 -24  29   1 6248.13 815.107   3
 -29  24   1 6485.03 781.120   3
 -24  29   4 10125.0 948.504   3
 -29  24   4 11126.6 995.798   3
 -24  29   7 5065.32 598.109   3
 -29  24   7 3608.05 513.112   3
  -4 -25  -6 1671.67 363.268   6
 -25  29  -6 3499.89 491.439   6
  -4 -25  -6 3418.83 566.988   5
   4 -29  -6 2850.61 605.331   5
  -4 -25  -3 1531.71 592.213   5
   4 -29  -3 677.318 626.042   5
 -25  29   0 21437.9 1223.86   3
 -29  25   0 22929.1 1270.90   3
  -4 -25   0 23332.9 1267.33   5
   4 -29   0 22754.8 1249.24   5
 -25  29   3-105.723 644.813   3
 -29  25   3-240.882 615.574   3
 -25  29   6 577.645 503.005   3
 -29  25   6-18.7945 484.653   3
 -26  29  -7 1511.06 322.634   6
  -3 -26  -7 963.984 365.672   5
   3 -29  -7 1145.38 363.746   5
  -3 -26  -4 1775.39 613.371   5
   3 -29  -4 2553.76 696.571   5
  -3 -26  -1 2400.38 645.471   5
   3 -29  -1 2619.42 701.847   5
 -26  29   2 1367.45 627.856   3
 -29  26   2 800.289 568.072   3
 -26  29   5 8792.34 832.697   3
 -29  26   5 6730.13 749.876   3
  -2 -27  -5 13150.9 914.012   5
   2 -29  -5 13209.1 959.507   5
  -2 -27  -2 15222.8 1075.07   5
   2 -29  -2 15751.4 1088.02   5
 -27  29   1 15039.6 1059.02   3
 -29  27   1 14968.2 1042.80   3
  -2 -27   1 18427.8 1070.89   5
   2 -29   1 18133.2 1049.14   5
 -27  29   4 64.6207 543.558   3
 -29  27   4-264.642 617.444   3
 -27  29   7 2857.23 458.279   3
 -29  27   7 2114.65 432.471   3
  -1 -28  -6 2609.15 494.961   5
   1 -29  -6 1169.86 421.526   5
  -1 -28  -3 421.506 540.354   5
   1 -29  -3 558.858 610.402   5
 -28  29   0 3934.62 635.729   3
  -1 -28   0 3778.91 647.917   5
   1 -29   0 4678.34 665.047   5
 -29  28   0 2838.43 583.303   3
 -28  29   3 8071.49 861.703   3
 -29  28   3 8789.17 854.468   3
 -28  29   6 7655.05 682.713   3
 -29  28   6 6882.09 652.188   3
   0 -29  -7-427.517 308.644   5
   0 -29  -4 12456.2 947.292   5
   0 -29  -1-208.773 548.327   5
 -29  29   2 14975.7 1025.95   3
 -29  29   5 255.378 466.681   3
   0  30  -6 6298.13 415.159   4
  30 -30  -6 6084.16 549.951   5
  30 -30  -3-910.665 633.120   5
   0  30  -3-2.91080 287.185   4
 -30   0   0 15271.5 1104.46   3
  30 -30   0 14435.1 871.085   5
 -30   0   3-87.6483 596.865   3
 -30   0   6 19269.7 898.202   3
  29 -30  -7 1758.34 334.245   5
  30 -29  -7 1211.87 324.501   5
  29 -30  -4 99.2820 549.417   5
  30 -29  -4-58.0589 568.239   5
   1  29  -4 539.223 311.598   4
  -1  30  -4 187.880 290.212   4
  29 -30  -1 1662.31 532.203   5
 -30   1  -1 2419.75 598.425   3
 -29  -1  -1 1952.45 589.933   3
  -1  30  -1 2686.73 491.083   4
 -30   1   2 2487.30 694.092   3
 -29  -1   2 1259.69 615.924   3
 -30   1   5 2183.57 557.170   3
 -29  -1   5 2110.12 570.509   3
  28 -30  -5 4659.22 630.385   5
  30 -28  -5 3604.90 594.821   5
  -2  30  -5 4445.52 448.748   4
  -2  30  -2 21537.1 942.659   4
 -28  -2  -2 18893.9 1123.37   3
  28 -30  -2 19215.9 1181.36   5
  -2  30   1 16403.1 858.192   4
 -30   2   1 14394.0 1136.31   3
 -28  -2   1 15340.1 1172.72   3
 -30   2   4 1460.30 587.684   3
 -28  -2   4 1087.25 590.750   3
 -30   2   7 3229.58 415.940   3
  30 -27  -6 319.468 386.947   5
  -3  30  -6 480.298 321.322   4
 -27  -3  -6 459.766 271.509   6
  27 -30  -6 1342.61 481.310   5
  -3  30  -3 11414.9 720.443   4
  27 -30  -3 10374.2 948.137   5
  -3  30   0 22946.5 1058.36   4
 -30   3   0 22291.9 1318.20   3
 -27  -3   0 22005.6 1373.06   3
  27 -30   0 21709.9 1101.54   5
 -30   3   3 5150.31 808.715   3
 -27  -3   3 6159.21 872.715   3
 -30   3   6 1670.08 479.317   3
 -27  -3   6 854.349 451.483   3
  -4  30  -7 783.829 306.314   4
 -26  -4  -7 456.592 266.829   6
  26 -30  -7 1139.67 388.535   5
  30 -26  -7 408.769 349.579   5
  26 -30  -4 7933.78 894.252   5
  -4  30  -4 8738.60 640.030   4
  26 -30  -1 7156.76 780.564   5
  -4  30  -1 8051.65 668.668   4
 -26  -4  -1 7678.13 918.202   3
 -30   4  -1 8760.84 879.580   3
 -30   4   2 1285.00 672.562   3
 -26  -4   2 2811.66 784.949   3
 -30   4   5 1620.87 589.702   3
 -26  -4   5 838.096 548.221   3
  -5  30  -8 2914.65 335.253   4
 -25  -5  -8 2562.12 304.647   6
  -5  30  -8 2379.44 358.081   6
  -5  30  -5 2147.97 442.668   4
 -25  -5  -5 1655.37 407.031   6
  25 -30  -5 2259.94 600.087   5
  -5  30  -2 48508.9 1592.10   4
  25 -30  -2 47410.4 1869.18   5
 -25  -5  -2 44236.8 1909.31   3
 -30   5   1 7346.97 891.545   3
 -25  -5   1 7487.03 953.220   3
 -30   5   4 466.484 628.226   3
 -25  -5   4 168.919 626.840   3
 -30   5   7 7610.59 612.631   3
  30 -24  -6 5730.67 647.908   5
  -6  30  -6 7024.91 580.004   4
 -24  -6  -6 5940.11 565.827   6
  24 -30  -6 6592.16 722.120   5
  24 -30  -3 5208.18 809.303   5
 -24  -6  -3 3770.68 531.261   6
  -6  30  -3 6291.99 639.082   4
 -24  -6  -3 4809.08 816.797   5
 -30   6   0 22465.1 1348.20   3
  24 -30   0 20089.0 1156.87   5
 -24  -6   0 23077.4 1430.54   3
 -30   6   3 14762.2 1179.69   3
 -24  -6   3 16304.1 1265.52   3
 -30   6   6 3124.42 601.960   3
 -24  -6   6 1953.04 488.631   3
  30 -23  -7 1226.10 395.978   5
  -7  30  -7 1526.46 380.327   4
 -23  -7  -7 1660.57 382.653   6
  23 -30  -7 2121.91 468.580   5
  -7  30  -4 12295.0 809.287   4
 -23  -7  -4 10096.7 735.364   6
 -23  -7  -4 11948.4 998.226   5
  23 -30  -4 10044.5 999.337   5
  23 -30  -1 8034.08 838.672   5
 -30   7  -1 8576.13 860.938   3
  -7  30  -1 9186.44 755.946   4
 -23  -7  -1 7441.83 934.997   3
 -23  -7  -1 8368.07 940.891   5
 -30   7   2 15343.6 1179.66   3
 -23  -7   2 17022.6 1271.54   3
 -30   7   5 3982.03 694.638   3
 -23  -7   5 3156.10 709.731   3
  -8  30  -8 486.638 304.908   4
 -22  -8  -8 534.718 289.687   6
  -8  30  -8 960.460 393.000   6
  22 -30  -8 655.800 324.949   5
  -8  30  -5 1413.71 483.506   4
 -22  -8  -5 995.541 444.210   6
 -22  -8  -5 1143.72 544.966   5
  22 -30  -5 1205.44 615.232   5
  22 -30  -2 5367.92 809.727   5
 -22  -8  -2 6625.09 866.005   3
 -22  -8  -2 4707.44 583.373   6
  -8  30  -2 6392.48 639.456   4
 -22  -8  -2 6614.12 882.562   5
 -22  -8   1 13522.1 1143.00   5
 -30   8   1 14803.8 1171.19   3
 -22  -8   1 13851.1 1170.99   3
 -30   8   4 8948.32 973.064   3
 -22  -8   4 8994.23 972.134   3
 -30   8   7 4453.25 570.052   3
  -9  30  -6 7948.24 656.473   4
 -21  -9  -6 7113.37 646.469   6
  21 -30  -6 7524.97 818.922   5
  21 -30  -3 8712.41 962.119   5
  -9  30  -3 9402.45 786.738   4
 -21  -9  -3 8028.47 709.213   6
 -21  -9  -3 7975.46 881.262   5
 -30   9   0 7339.43 892.780   3
  21 -30   0 8037.16 810.964   5
 -21  -9   0 8150.69 932.727   5
 -30   9   3 157.644 593.218   3
 -21  -9   3 381.809 687.647   3
 -30   9   6 433.070 523.450   3
 -21  -9   6 275.666 441.468   3
  30 -20  -7 1663.37 433.475   5
 -10  30  -7 1896.02 426.797   4
 -20 -10  -7 2482.97 457.281   6
  20 -30  -7 2586.77 541.367   5
 -10  30  -4 12519.3 893.933   4
 -20 -10  -4 9940.97 807.607   6
 -20 -10  -4 12595.6 1014.00   5
  20 -30  -4 12210.7 1081.61   5
 -20 -10  -1 43840.4 1593.40   6
 -20 -10  -1 45793.1 1927.04   5
 -30  10  -1 45254.9 1821.74   3
  20 -30  -1 47383.7 1855.73   5
 -20 -10   2 10621.8 1004.03   5
 -30  10   2 11917.0 1068.01   3
 -30  10   5 1042.69 646.292   3
 -20 -10   5 1593.43 619.560   3
 -30  11  -8 3802.72 360.732   6
 -11  30  -8 4090.89 443.342   4
 -19 -11  -8 3432.24 438.641   6
 -11  30  -8 3981.49 548.576   6
  19 -30  -8 3742.52 453.569   5
 -19 -11  -5 3418.65 565.746   6
 -11  30  -5 3561.71 576.726   4
 -19 -11  -5 2596.93 616.861   5
  19 -30  -5 3033.93 788.585   5
 -11  30  -2 16986.8 976.209   4
 -19 -11  -2 16306.4 941.651   6
 -19 -11  -2 16929.4 1185.85   5
  19 -30  -2 16335.3 1219.69   5
 -19 -11   1 27420.2 1492.10   5
 -30  11   1 25457.9 1457.49   3
 -30  11   4 2432.32 723.417   3
 -19 -11   4 3070.64 746.494   3
 -30  11   7 610.436 439.222   3
 -12  30  -9 1251.01 276.974   4
 -18 -12  -9 810.247 244.337   6
 -12  30  -9 1452.00 338.753   6
 -12  30  -6 318.077 410.025   4
 -18 -12  -6-70.5962 445.733   6
 -18 -12  -6 119.829 443.917   5
  18 -30  -6 791.575 598.317   5
 -18 -12  -3 1601.61 507.752   6
 -12  30  -3 743.605 458.564   4
 -18 -12  -3 1350.18 657.884   5
  18 -30  -3 1975.87 715.136   5
 -18 -12   0 25516.7 1410.57   5
 -30  12   0 22800.6 1354.18   3
  18 -30   0 23114.1 1287.36   5
 -30  12   3 10660.9 1037.06   3
 -30  12   6 21436.0 1204.97   3
 -18 -12   6 20936.3 1131.82   3
 -13  30  -7 2699.52 460.185   4
 -17 -13  -7 2719.73 485.955   6
  17 -30  -7 2380.91 570.667   5
 -17 -13  -4 5000.42 619.361   6
 -13  30  -4 4957.99 684.383   4
 -17 -13  -4 3955.56 734.111   5
  17 -30  -4 4483.79 819.040   5
 -17 -13  -1 20219.8 1056.89   6
 -17 -13  -1 17360.9 1226.25   5
 -30  13  -1 18385.7 1171.91   3
  17 -30  -1 19547.8 1251.12   5
 -30  13   2 10735.3 997.584   3
 -17 -13   2 10106.6 942.204   5
 -30  13   5 5959.04 787.046   3
 -17 -13   5 5973.57 775.179   3
 -30  13   8 696.765 358.772   3
 -14  30  -8 1999.22 396.626   4
 -16 -14  -8 1727.02 399.963   6
 -30  14  -8 1216.46 299.136   6
 -14  30  -8 1237.39 435.360   6
  16 -30  -8 648.013 340.735   5
 -14  30  -5 14902.1 907.611   4
 -16 -14  -5 14402.3 922.240   6
 -16 -14  -5 14761.5 1031.13   5
  16 -30  -5 14225.3 1182.79   5
 -14  30  -2 9897.78 786.419   4
 -16 -14  -2 8774.15 733.150   6
  16 -30  -2 8775.37 1031.22   5
 -16 -14  -2 8581.44 899.963   5
 -16 -14   1 30751.8 1543.08   5
 -30  14   1 27751.5 1506.99   3
 -30  14   4 17394.2 1229.24   3
 -30  14   7 18504.5 1010.21   3
 -15 -15  -9-139.427 226.520   6
 -15  30  -9 631.047 316.946   6
 -15  30  -6 706.035 451.483   4
 -15 -15  -6 563.051 466.426   6
 -15 -15  -6 162.926 438.702   5
  15 -30  -6 1456.52 672.785   5
 -15  30  -3 18161.7 1033.48   4
 -15 -15  -3 16726.3 989.744   6
 -15 -15  -3 16516.0 1114.69   5
  15 -30  -3 18739.1 1307.31   5
 -30  15   0 7835.19 864.035   3
  15 -30   0 8222.24 863.540   5
 -15 -15   0 8176.28 912.786   5
 -30  15   3 15730.0 1215.14   3
 -30  15   6 818.203 553.197   3
 -16  30  -7 17282.3 861.305   4
 -14 -16  -7 16512.2 867.461   6
 -16  30  -7 16235.1 957.027   6
  14 -30  -7 16678.4 968.160   5
 -16  30  -4 16298.2 960.469   4
 -14 -16  -4 16341.5 988.938   6
 -14 -16  -4 15569.3 1065.49   5
  14 -30  -4 18167.3 1295.00   5
 -14 -16  -1 30777.4 1280.62   6
 -14 -16  -1 26277.2 1441.21   5
 -30  16  -1 30393.9 1437.12   3
  14 -30  -1 27450.0 1462.29   5
 -30  16   2 8749.54 956.002   3
 -14 -16   2 9345.13 900.976   5
 -30  16   5 14225.9 1110.01   3
 -14 -16   5 14869.6 1057.77   3
 -30  16   8 1249.64 367.469   3
 -17  30  -8 261.466 292.486   4
 -13 -17  -8 901.977 333.331   6
 -17  30  -8-297.858 400.502   6
  13 -30  -8 282.668 328.853   5
 -13 -17  -5 5500.00 651.576   6
 -17  30  -5 5528.67 615.509   4
 -13 -17  -5 6430.54 782.215   5
  13 -30  -5 7131.24 932.221   5
 -13 -17  -2 10890.6 802.180   6
  13 -30  -2 12674.5 1113.18   5
 -13 -17   1 22295.2 1303.40   5
 -30  17   1 18439.7 1228.73   3
 -30  17   4 4919.66 818.577   3
 -30  17   7 2665.53 540.898   3
 -12 -18  -9 1356.94 244.342   6
 -18  30  -9 2670.03 348.818   6
 -18  30  -6 20126.9 952.727   4
 -12 -18  -6 18829.2 979.329   6
 -12 -18  -6 19822.2 1077.95   5
  12 -30  -6 18267.6 1170.01   5
 -18  30  -3 12632.1 839.427   4
 -12 -18  -3 10587.9 831.379   6
 -12 -18  -3 10700.2 942.853   5
  12 -30  -3 12807.0 1186.15   5
 -30  18   0 25593.5 1379.61   3
 -12 -18   0 25473.8 1411.34   5
  12 -30   0 24728.4 1352.97   5
 -30  18   3 875.262 653.221   3
 -18  30   3 2585.07 712.288   3
 -30  18   6 432.889 558.116   3
 -19  30  -7 982.409 351.331   4
 -11 -19  -7 265.476 367.712   6
 -19  30  -7 456.565 413.688   6
 -11 -19  -7 589.197 362.514   5
  11 -30  -7 415.164 452.188   5
 -11 -19  -4 2532.91 546.481   6
 -19  30  -4 2880.16 517.339   4
 -11 -19  -4 2687.19 676.530   5
  11 -30  -4 3733.80 847.220   5
 -11 -19  -1 27785.5 1224.39   6
 -11 -19  -1 26809.4 1428.24   5
  11 -30  -1 28466.9 1508.51   5
 -19  30   2 16864.4 1230.03   3
 -11 -19   2 18097.9 1096.02   5
 -30  19   2 15336.5 1139.30   3
 -30  19   5 3231.59 692.898   3
 -19  30   5 4427.48 757.141   3
 -30  19   8 3513.52 426.197   3
 -20  30  -8 7698.83 477.167   4
 -10 -20  -8 5886.14 457.454   6
 -20  30  -8 6962.18 556.742   6
  10 -30  -8 6988.66 510.330   5
 -10 -20  -5 704.901 459.179   6
 -20  30  -5 1608.28 440.145   4
 -10 -20  -5 871.393 525.578   5
  10 -30  -5 1391.88 673.377   5
 -20  30  -2 14116.0 883.857   4
 -10 -20  -2 10514.1 813.526   6
 -10 -20  -2 10831.2 959.259   5
  10 -30  -2 13542.9 1119.06   5
 -20  30   1 46233.4 1940.08   3
 -30  20   1 46036.2 1940.26   3
 -20  30   4 11980.3 1044.98   3
 -30  20   4 12702.5 1047.90   3
 -30  20   7 1698.47 471.917   3
 -21  30  -6 317.139 350.537   4
  -9 -21  -6-77.0312 440.018   6
 -21  30  -6 514.645 421.550   6
  -9 -21  -6 949.183 500.085   5
   9 -30  -6 170.367 539.326   5
  -9 -21  -3 580.010 433.062   6
 -21  30  -3 687.453 417.310   4
  -9 -21  -3 8.69970 567.163   5
   9 -30  -3 1443.73 715.528   5
 -30  21   0 8656.83 858.396   3
 -21  30   0 8316.55 880.802   3
  -9 -21   0 8753.19 936.363   5
   9 -30   0 8948.37 885.704   5
 -30  21   3 8755.80 947.456   3
 -21  30   3 9069.50 981.450   3
 -30  21   6 8132.66 809.544   3
  -8 -22  -7 3394.17 436.257   6
 -22  30  -7 3899.43 493.416   6
  -8 -22  -7 3380.74 470.732   5
   8 -30  -7 4329.69 573.851   5
 -22  30  -4 10327.4 729.333   4
  -8 -22  -4 8458.35 723.158   6
 -22  30  -4 9037.45 751.602   6
  -8 -22  -4 8188.34 840.747   5
   8 -30  -4 10096.1 1035.33   5
  -8 -22  -1 16445.8 1121.95   5
   8 -30  -1 16162.3 1147.63   5
  -8 -22   2 5904.81 718.007   5
 -22  30   2 6878.94 857.038   3
 -30  22   2 5685.82 813.284   3
 -22  30   5 2123.62 639.712   3
 -30  22   5 769.786 579.307   3
 -30  22   8 741.740 309.605   3
 -23  30  -8 4422.03 393.556   6
   7 -30  -8 3653.20 384.441   5
  -7 -23  -5 3089.56 507.601   6
 -23  30  -5 3860.11 460.420   4
 -23  30  -5 3730.50 541.711   6
  -7 -23  -5 3065.90 624.124   5
   7 -30  -5 3186.49 686.281   5
 -23  30  -2 17405.9 908.759   4
  -7 -23  -2 14326.4 1046.97   5
   7 -30  -2 15318.2 1130.23   5
  -7 -23   1 10825.4 936.578   5
 -23  30   1 8363.10 876.681   3
 -30  23   1 8046.23 870.503   3
 -23  30   4 11049.3 973.429   3
 -30  23   4 11513.9 1027.02   3
 -30  23   7 652.983 396.538   3
  -6 -24  -6 622.892 347.442   6
 -24  30  -6 1455.44 383.470   6
  -6 -24  -6 1334.47 451.357   5
   6 -30  -6 2174.70 558.538   5
 -24  30  -3 16294.0 873.340   4
  -6 -24  -3 13826.5 831.318   6
  -6 -24  -3 14893.4 1020.76   5
   6 -30  -3 15005.0 1137.96   5
 -24  30   0 23353.7 1274.81   3
 -30  24   0 23891.1 1309.65   3
  -6 -24   0 26393.2 1367.84   5
   6 -30   0 23940.0 1283.74   5
 -24  30   3 5550.43 794.051   3
 -30  24   3 5064.25 784.913   3
 -24  30   6 7565.21 757.533   3
 -30  24   6 6810.36 698.290   3
 -25  30  -7 6846.72 479.081   6
  -5 -25  -7 6967.86 548.455   5
   5 -30  -7 6534.55 549.859   5
  -5 -25  -4-52.9302 526.857   5
   5 -30  -4-460.127 683.186   5
 -25  30  -1 7015.24 712.131   3
[truncated: 87,999 more chars]
